# Supplementary material
Source: PubMed Central journal article supplement (PMC3431965)

# Supporting Information

## Synthesis and Evaluation of Eight- and Four-membered Iminosugar Analogues as Inhibitors of Testicular Ceramide-specific Glucosyltransferase, Testicular $\beta$ -Glucosidase 2, and other Glycosidases

Jae Chul Lee, Subhashree Francis, Dinah Dutta, Vijayalaxmi Gupta, Yan Yang, Jin-Yi Zhu,

Joseph S. Tash, Ernst Schönbrunn, and Gunda I. Georg

georg@umn.edu

### Table of Contents

|                                         |     |
|-----------------------------------------|-----|
| X-ray crystal structure data-----       | S5  |
| Proton NMR of compound <b>15</b> -----  | S28 |
| Carbon NMR of compound <b>15</b> -----  | S29 |
| Proton NMR of compound <b>8a</b> -----  | S30 |
| Carbon NMR of compound <b>8a</b> -----  | S31 |
| Proton NMR of compound <b>7a</b> -----  | S32 |
| Carbon NMR of compound <b>7a</b> -----  | S33 |
| Proton NMR of compound <b>8b</b> -----  | S34 |
| Carbon NMR of compound <b>8b</b> -----  | S35 |
| Proton NMR of compound <b>7b</b> -----  | S36 |
| Carbon NMR of compound <b>7b</b> -----  | S37 |
| Proton NMR of compound <b>16</b> -----  | S38 |
| Carbon NMR of compound <b>16</b> -----  | S39 |
| Proton NMR of compound <b>17a</b> ----- | S40 |

|                                         |     |
|-----------------------------------------|-----|
| Carbon NMR of compound <b>17a</b> ----- | S41 |
| Proton NMR of compound <b>17b</b> ----- | S42 |
| Carbon NMR of compound <b>17b</b> ----- | S43 |
| Proton NMR of compound <b>1</b> -----   | S44 |
| Carbon NMR of compound <b>1</b> -----   | S45 |
| Proton NMR of compound <b>2</b> -----   | S46 |
| Carbon NMR of compound <b>2</b> -----   | S47 |
| Proton NMR of compound <b>3</b> -----   | S48 |
| Carbon NMR of compound <b>3</b> -----   | S49 |
| Proton NMR of compound <b>4</b> -----   | S50 |
| Carbon NMR of compound <b>4</b> -----   | S51 |
| Proton NMR of compound <b>18</b> -----  | S52 |
| Carbon NMR of compound <b>18</b> -----  | S53 |
| Proton NMR of compound <b>19</b> -----  | S54 |
| Carbon NMR of compound <b>19</b> -----  | S55 |
| Proton NMR of compound <b>20</b> -----  | S56 |
| Carbon NMR of compound <b>20</b> -----  | S57 |
| Proton NMR of compound <b>21a</b> ----- | S58 |
| Carbon NMR of compound <b>21a</b> ----- | S59 |
| Proton NMR of compound <b>21b</b> ----- | S60 |
| Carbon NMR of compound <b>21b</b> ----- | S61 |
| Proton NMR of compound <b>5</b> -----   | S62 |
| Carbon NMR of compound <b>5</b> -----   | S63 |
| Proton NMR of compound <b>6</b> -----   | S64 |
| Carbon NMR of compound <b>6</b> -----   | S65 |
| Proton NMR of compound <b>29</b> -----  | S66 |
| Carbon NMR of compound <b>29</b> -----  | S67 |
| Proton NMR of compound <b>30</b> -----  | S68 |
| Carbon NMR of compound <b>30</b> -----  | S69 |
| Proton NMR of compound <b>31</b> -----  | S70 |
| Carbon NMR of compound <b>31</b> -----  | S71 |

|                                         |      |
|-----------------------------------------|------|
| Proton NMR of compound <b>32</b> -----  | S72  |
| Carbon NMR of compound <b>32</b> -----  | S73  |
| Proton NMR of compound <b>33</b> -----  | S74  |
| Carbon NMR of compound <b>33</b> -----  | S75  |
| Proton NMR of compound <b>34</b> -----  | S76  |
| Carbon NMR of compound <b>34</b> -----  | S77  |
| Proton NMR of compound <b>35a</b> ----- | S78  |
| Carbon NMR of compound <b>35a</b> ----- | S79  |
| Proton NMR of compound <b>35b</b> ----- | S80  |
| Carbon NMR of compound <b>35b</b> ----- | S81  |
| Proton NMR of compound <b>22</b> -----  | S82  |
| Carbon NMR of compound <b>22</b> -----  | S83  |
| Proton NMR of compound <b>23</b> -----  | S84  |
| Carbon NMR of compound <b>23</b> -----  | S85  |
| Proton NMR of compound <b>37</b> -----  | S86  |
| Carbon NMR of compound <b>37</b> -----  | S87  |
| Proton NMR of compound <b>38</b> -----  | S88  |
| Carbon NMR of compound <b>38</b> -----  | S89  |
| Proton NMR of compound <b>39</b> -----  | S90  |
| Carbon NMR of compound <b>39</b> -----  | S91  |
| Proton NMR of compound <b>40</b> -----  | S92  |
| Carbon NMR of compound <b>40</b> -----  | S93  |
| Proton NMR of compound <b>41a</b> ----- | S94  |
| Carbon NMR of compound <b>41a</b> ----- | S95  |
| Proton NMR of compound <b>41b</b> ----- | S96  |
| Carbon NMR of compound <b>41b</b> ----- | S97  |
| Proton NMR of compound <b>24</b> -----  | S98  |
| Carbon NMR of compound <b>24</b> -----  | S99  |
| Proton NMR of compound <b>25</b> -----  | S100 |
| Carbon NMR of compound <b>25</b> -----  | S101 |
| Proton NMR of compound <b>43</b> -----  | S102 |

|                                         |      |
|-----------------------------------------|------|
| Carbon NMR of compound <b>43</b> -----  | S103 |
| Proton NMR of compound <b>44</b> -----  | S104 |
| Carbon NMR of compound <b>44</b> -----  | S105 |
| Proton NMR of compound <b>45</b> -----  | S106 |
| Carbon NMR of compound <b>45</b> -----  | S107 |
| Proton NMR of compound <b>46</b> -----  | S108 |
| Carbon NMR of compound <b>46</b> -----  | S109 |
| Proton NMR of compound <b>47a</b> ----- | S110 |
| Carbon NMR of compound <b>47a</b> ----- | S111 |
| Proton NMR of compound <b>47b</b> ----- | S112 |
| Carbon NMR of compound <b>47b</b> ----- | S113 |
| Proton NMR of compound <b>26</b> -----  | S114 |
| Carbon NMR of compound <b>26</b> -----  | S115 |
| Proton NMR of compound <b>27</b> -----  | S116 |
| Carbon NMR of compound <b>27</b> -----  | S117 |

REFERENCE NUMBER: 08001

CRYSTAL STRUCTURE REPORT

$2(\text{C}_{16}\text{H}_{33}\text{N}\text{O}_5); \text{H}_2\text{O}$

$\text{C}_{32}\text{H}_{68}\text{N}_2\text{O}_{11}$

Report prepared for:

Dr. Jae Chul Lee

Prof. Gunda Georg

January 9, 2008

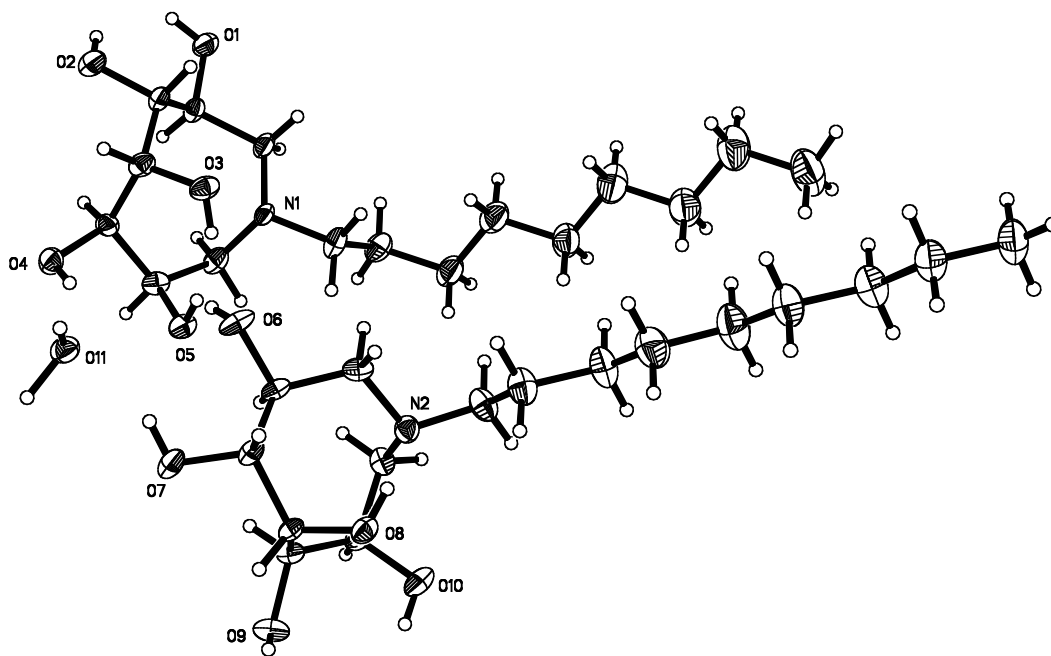

Benjamin E. Kucera

X-Ray Crystallographic Laboratory

Department of Chemistry

University of Minnesota

207 Pleasant St. S.E.

Minneapolis, MN 55455

### Data collection

A crystal (approximate dimensions  $0.35 \times 0.30 \times 0.02 \text{ mm}^3$ ) was placed onto the tip of a 0.1 mm diameter glass capillary and mounted on a Bruker SMART Platform CCD diffractometer for a data collection at 173(2) K.<sup>1</sup> A preliminary set of cell constants was calculated from reflections harvested from three sets of 20 frames. These initial sets of frames were oriented such that orthogonal wedges of reciprocal space were surveyed. This produced initial orientation matrices determined from 93 reflections. The data collection was carried out using MoK $\alpha$  radiation (graphite monochromator) with a frame time of 120 seconds and a detector distance of 4.86 cm. A randomly oriented region of reciprocal space was surveyed to the extent of one sphere and to a resolution of 0.84 Å. Four major sections of frames were collected with 0.30° steps in  $\omega$  at four different  $\phi$  settings and a detector position of -28° in  $2\theta$ . The intensity data were corrected for absorption and decay (SADABS).<sup>2</sup> Final cell constants were calculated from the xyz centroids of 2524 strong reflections from the actual data collection after integration (SAINT).<sup>3</sup> Please refer to Table 1 for additional crystal and refinement information.

### Structure solution and refinement

The structure was solved using SHELXS-97<sup>4</sup> and refined using SHELXL-97.<sup>4</sup> The space group  $P2_1$  was determined based on systematic absences and intensity statistics. A direct-methods solution was calculated which provided most non-hydrogen atoms from the E-map. Full-matrix least squares / difference Fourier cycles were performed which located the remaining non-hydrogen atoms. All non-hydrogen atoms were refined with anisotropic displacement parameters. All hydrogen atoms were placed in ideal positions and refined as riding atoms with relative isotropic displacement parameters. The final full matrix least squares refinement converged to  $R1 = 0.0527$  and  $wR2 = 0.1700$  ( $F^2$ , all data).

### Structure description

The structure is the one suggested. There are two identical molecules in the asymmetric unit, as well as one water molecule. The absolute stereochemistry cannot be assigned from the diffraction data due to the lack of a heavy atom ( $> \text{Si}$ ); however, the chemist has assigned the stereochemistry based on a known chiral center. The stereochemistry of C2, C3, C5 and C6 are S, R, R, and R respectively; and the stereochemistry of C18, C19, C21 and C22 are S, R, R, and R respectively. The two molecules have several hydrogen bond interactions to each other, as well as to the water molecule.

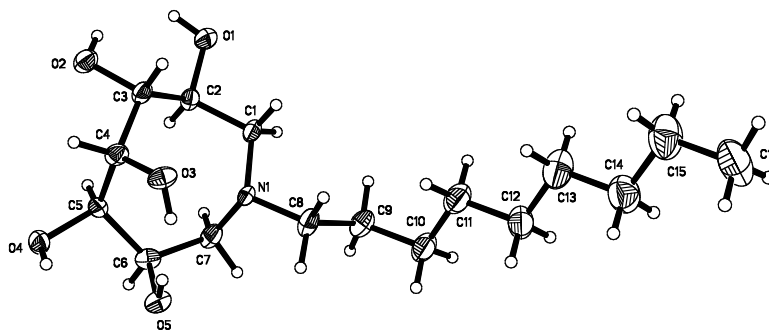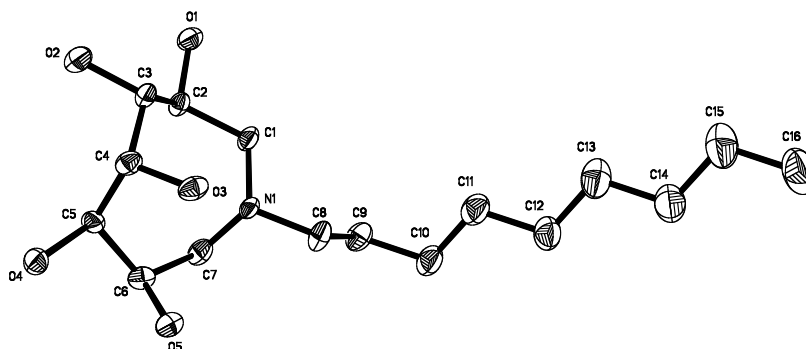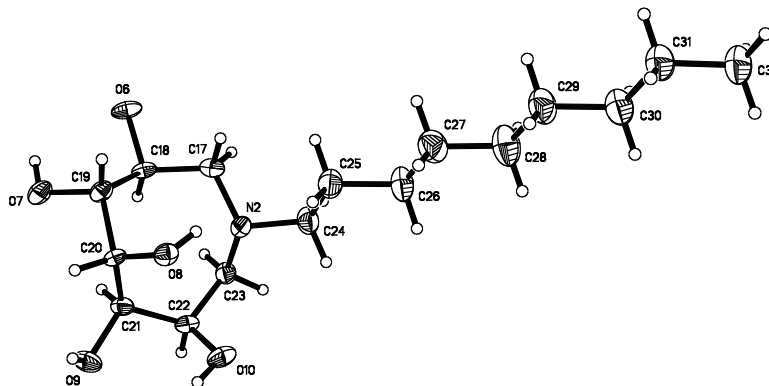

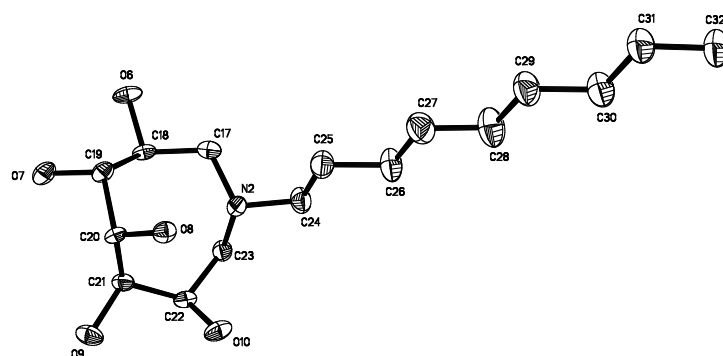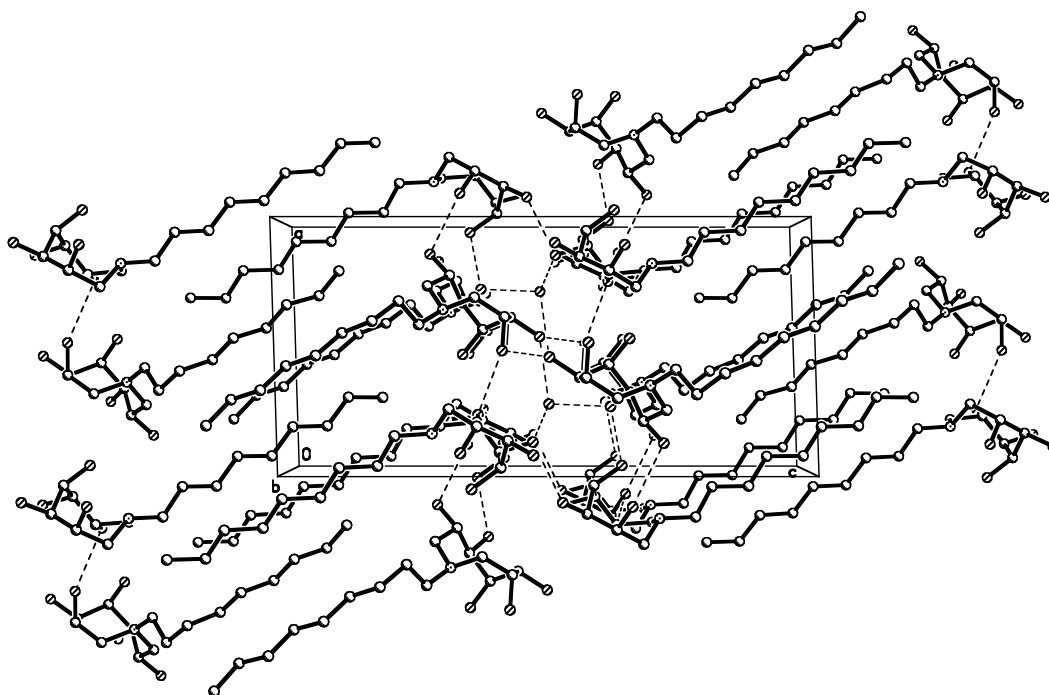

**Matrix Packing Plot (looking down the b-axis, hydrogen atoms omitted for clarity)**

Data collection and structure solution were conducted at the X-Ray Crystallographic Laboratory, S146 Kolthoff Hall, Department of Chemistry, University of Minnesota. All calculations were performed using Pentium computers using the current SHELXTL suite of programs. All publications arising from this report MUST either 1)include Benjamin E. Kucera as a coauthor or 2)acknowledge Benjamin E. Kucera, Victor G. Young, Jr., and the X-Ray Crystallographic Laboratory.



**References:**

1. SMART V5.054, Bruker Analytical X-ray Systems, Madison, WI (2001).
2. An empirical correction for absorption anisotropy, R. Blessing, *Acta Cryst.* **A51**, 33-38 (1995).
3. SAINT+ V6.45, Bruker Analytical X-Ray Systems, Madison, WI (2003).
4. SHELXTL V6.14, Bruker Analytical X-Ray Systems, Madison, WI (2000).

Some equations of interest:

$$R_{\text{int}} = \Sigma |F_o^2 - \langle F_o^2 \rangle| / \Sigma |F_o^2|$$

$$R_1 = \Sigma ||F_o| - |F_c|| / \Sigma |F_o|$$

$$wR2 = [\Sigma [w(F_o^2 - F_c^2)^2] / \Sigma [w(F_o^2)^2]]^{1/2}$$

$$\text{where } w = q / [\sigma^2 (F_o^2) + (a*P)^2 + b*P + d + e*\sin(\theta)]$$

$$\text{Goof} = S = [\Sigma [w(F_o^2 - F_c^2)^2] / (n-p)]^{1/2}$$

**Table 1.** Crystal data and structure refinement for 08001.

|                                        |                                                            |                           |
|----------------------------------------|------------------------------------------------------------|---------------------------|
| Identification code                    | 08001                                                      |                           |
| Empirical formula                      | $C_{32} H_{68} N_2 O_{11}$                                 |                           |
| Formula weight                         | 656.88                                                     |                           |
| Temperature                            | 173(2) K                                                   |                           |
| Wavelength                             | 0.71073 Å                                                  |                           |
| Crystal system                         | Monoclinic                                                 |                           |
| Space group                            | $P2_1$                                                     |                           |
| Unit cell dimensions                   | $a = 10.3632(13)$ Å                                        | $\alpha = 90^\circ$       |
|                                        | $b = 8.1773(10)$ Å                                         | $\beta = 91.751(2)^\circ$ |
|                                        | $c = 21.547(3)$ Å                                          | $\gamma = 90^\circ$       |
| Volume                                 | $1825.1(4)$ Å <sup>3</sup>                                 |                           |
| Z                                      | 2                                                          |                           |
| Density (calculated)                   | 1.195 Mg/m <sup>3</sup>                                    |                           |
| Absorption coefficient                 | 0.088 mm <sup>-1</sup>                                     |                           |
| $F(000)$                               | 724                                                        |                           |
| Crystal color, morphology              | colorless, plate                                           |                           |
| Crystal size                           | 0.35 x 0.30 x 0.02 mm <sup>3</sup>                         |                           |
| Theta range for data collection        | 0.95 to 25.08°                                             |                           |
| Index ranges                           | $-12 \leq h \leq 12, -9 \leq k \leq 9, -25 \leq l \leq 23$ |                           |
| Reflections collected                  | 13985                                                      |                           |
| Independent reflections                | 3487 [ $R(\text{int}) = 0.0746$ ]                          |                           |
| Observed reflections                   | 2408                                                       |                           |
| Completeness to theta = 25.08°         | 99.6%                                                      |                           |
| Absorption correction                  | Multi-scan                                                 |                           |
| Max. and min. transmission             | 0.9982 and 0.9697                                          |                           |
| Refinement method                      | Full-matrix least-squares on $F^2$                         |                           |
| Data / restraints / parameters         | 3487 / 1 / 408                                             |                           |
| Goodness-of-fit on $F^2$               | 1.016                                                      |                           |
| Final $R$ indices [ $I > 2\sigma(I)$ ] | $R1 = 0.0527, wR2 = 0.1310$                                |                           |
| $R$ indices (all data)                 | $R1 = 0.1022, wR2 = 0.1700$                                |                           |
| Absolute structure parameter           | 0(10)                                                      |                           |
| Largest diff. peak and hole            | 0.314 and -0.460 e.Å <sup>-3</sup>                         |                           |

**Table 2.** Atomic coordinates ( $\times 10^4$ ) and equivalent isotropic displacement parameters ( $\text{\AA}^2 \times 10^3$ ) for 08001.  $U_{\text{eq}}$  is defined as one third of the trace of the orthogonalized  $U_{ij}$  tensor.

|     | x        | y        | z        | $U_{\text{eq}}$ |
|-----|----------|----------|----------|-----------------|
| O1  | 1311(4)  | 707(5)   | 7139(2)  | 29(1)           |
| O2  | 2682(4)  | -818(5)  | 6198(2)  | 27(1)           |
| O3  | 5308(3)  | 1909(5)  | 6554(2)  | 25(1)           |
| O4  | 4608(4)  | 1994(5)  | 5087(2)  | 26(1)           |
| O5  | 5152(3)  | 4703(5)  | 5785(2)  | 24(1)           |
| N1  | 3562(4)  | 4120(6)  | 6867(2)  | 21(1)           |
| C1  | 2623(6)  | 3056(7)  | 7163(3)  | 25(1)           |
| C2  | 2174(5)  | 1622(7)  | 6764(3)  | 20(1)           |
| C3  | 3249(5)  | 474(7)   | 6560(3)  | 23(1)           |
| C4  | 4322(5)  | 1164(7)  | 6169(3)  | 22(1)           |
| C5  | 3844(6)  | 2274(7)  | 5627(3)  | 21(1)           |
| C6  | 3847(5)  | 4148(7)  | 5728(3)  | 22(1)           |
| C7  | 3102(5)  | 4796(8)  | 6270(3)  | 27(1)           |
| C8  | 4153(6)  | 5330(8)  | 7303(3)  | 30(1)           |
| C9  | 3272(6)  | 6510(7)  | 7633(3)  | 31(2)           |
| C10 | 4040(6)  | 7555(9)  | 8102(3)  | 38(2)           |
| C11 | 4481(7)  | 6607(8)  | 8680(3)  | 41(2)           |
| C12 | 5336(7)  | 7555(10) | 9136(3)  | 41(2)           |
| C13 | 5735(7)  | 6591(10) | 9719(3)  | 49(2)           |
| C14 | 6641(7)  | 7494(11) | 10157(3) | 51(2)           |
| C15 | 7016(8)  | 6530(11) | 10740(4) | 58(2)           |
| C16 | 7977(8)  | 7383(14) | 11162(3) | 65(3)           |
| O6  | 7638(4)  | 3831(5)  | 6277(2)  | 28(1)           |
| O7  | 8657(4)  | 5383(5)  | 5264(2)  | 27(1)           |
| O8  | 10348(3) | 7959(5)  | 6390(2)  | 23(1)           |
| O9  | 8998(4)  | 10016(5) | 5252(2)  | 29(1)           |
| O10 | 8888(4)  | 10945(5) | 6529(2)  | 30(1)           |
| N2  | 8263(4)  | 7804(6)  | 7073(2)  | 24(1)           |
| C17 | 8018(5)  | 6049(7)  | 6959(3)  | 24(1)           |
| C18 | 7888(5)  | 5563(7)  | 6280(3)  | 22(1)           |
| C19 | 9029(5)  | 5854(7)  | 5881(3)  | 22(1)           |

|     |          |          |          |       |
|-----|----------|----------|----------|-------|
| C20 | 9552(5)  | 7630(7)  | 5854(2)  | 19(1) |
| C21 | 8501(5)  | 8903(7)  | 5705(3)  | 23(1) |
| C22 | 7942(5)  | 9882(7)  | 6240(3)  | 22(1) |
| C23 | 7326(5)  | 8878(7)  | 6744(3)  | 23(1) |
| C24 | 8344(6)  | 8176(8)  | 7742(3)  | 32(2) |
| C25 | 9493(6)  | 7443(9)  | 8084(3)  | 36(2) |
| C26 | 9543(7)  | 8005(10) | 8759(3)  | 43(2) |
| C27 | 10682(7) | 7341(10) | 9137(3)  | 46(2) |
| C28 | 10719(6) | 7865(12) | 9809(3)  | 50(2) |
| C29 | 11839(7) | 7229(10) | 10196(3) | 44(2) |
| C30 | 11895(6) | 7800(11) | 10869(3) | 45(2) |
| C31 | 13007(7) | 7106(10) | 11260(3) | 49(2) |
| C32 | 13006(8) | 7702(12) | 11926(3) | 61(2) |
| O11 | 7251(3)  | 2615(5)  | 4946(2)  | 26(1) |

---

**Table 3.** Bond lengths [ $\text{\AA}$ ] and angles [ $^\circ$ ] for 08001.

|            |          |              |           |
|------------|----------|--------------|-----------|
| O(1)-C(2)  | 1.435(7) | C(10)-C(11)  | 1.525(9)  |
| O(1)-H(1C) | 0.8400   | C(10)-H(10A) | 0.9900    |
| O(2)-C(3)  | 1.430(7) | C(10)-H(10B) | 0.9900    |
| O(2)-H(2B) | 0.8400   | C(11)-C(12)  | 1.516(9)  |
| O(3)-C(4)  | 1.432(6) | C(11)-H(11A) | 0.9900    |
| O(3)-H(3B) | 0.8400   | C(11)-H(11B) | 0.9900    |
| O(4)-C(5)  | 1.445(6) | C(12)-C(13)  | 1.530(10) |
| O(4)-H(4B) | 0.8400   | C(12)-H(12A) | 0.9900    |
| O(5)-C(6)  | 1.429(7) | C(12)-H(12B) | 0.9900    |
| O(5)-H(5B) | 0.8400   | C(13)-C(14)  | 1.504(10) |
| N(1)-C(1)  | 1.466(7) | C(13)-H(13A) | 0.9900    |
| N(1)-C(7)  | 1.467(7) | C(13)-H(13B) | 0.9900    |
| N(1)-C(8)  | 1.483(7) | C(14)-C(15)  | 1.524(10) |
| C(1)-C(2)  | 1.520(8) | C(14)-H(14A) | 0.9900    |
| C(1)-H(1A) | 0.9900   | C(14)-H(14B) | 0.9900    |
| C(1)-H(1B) | 0.9900   | C(15)-C(16)  | 1.499(11) |
| C(2)-C(3)  | 1.531(8) | C(15)-H(15A) | 0.9900    |
| C(2)-H(2A) | 1.0000   | C(15)-H(15B) | 0.9900    |
| C(3)-C(4)  | 1.525(8) | C(16)-H(16A) | 0.9800    |
| C(3)-H(3A) | 1.0000   | C(16)-H(16B) | 0.9800    |
| C(4)-C(5)  | 1.548(8) | C(16)-H(16C) | 0.9800    |
| C(4)-H(4A) | 1.0000   | O(6)-C(18)   | 1.439(7)  |
| C(5)-C(6)  | 1.547(8) | O(6)-H(6B)   | 0.8400    |
| C(5)-H(5A) | 1.0000   | O(7)-C(19)   | 1.426(7)  |
| C(6)-C(7)  | 1.515(8) | O(7)-H(7C)   | 0.8400    |
| C(6)-H(6A) | 1.0000   | O(8)-C(20)   | 1.424(6)  |
| C(7)-H(7A) | 0.9900   | O(8)-H(8C)   | 0.8400    |
| C(7)-H(7B) | 0.9900   | O(9)-C(21)   | 1.441(7)  |
| C(8)-C(9)  | 1.520(8) | O(9)-H(9C)   | 0.8400    |
| C(8)-H(8A) | 0.9900   | O(10)-C(22)  | 1.438(7)  |
| C(8)-H(8B) | 0.9900   | O(10)-H(10C) | 0.8400    |
| C(9)-C(10) | 1.529(8) | N(2)-C(24)   | 1.473(7)  |
| C(9)-H(9A) | 0.9900   | N(2)-C(23)   | 1.475(7)  |
| C(9)-H(9B) | 0.9900   | N(2)-C(17)   | 1.476(8)  |

|              |          |                  |           |
|--------------|----------|------------------|-----------|
| C(17)-C(18)  | 1.518(8) | C(31)-C(32)      | 1.514(10) |
| C(17)-H(17A) | 0.9900   | C(31)-H(31A)     | 0.9900    |
| C(17)-H(17B) | 0.9900   | C(31)-H(31B)     | 0.9900    |
| C(18)-C(19)  | 1.502(8) | C(32)-H(32A)     | 0.9800    |
| C(18)-H(18A) | 1.0000   | C(32)-H(32B)     | 0.9800    |
| C(19)-C(20)  | 1.552(8) | C(32)-H(32C)     | 0.9800    |
| C(19)-H(19A) | 1.0000   | O(11)-H(11C)     | 1.0679    |
| C(20)-C(21)  | 1.535(8) | O(11)-H(11D)     | 0.8495    |
| C(20)-H(20A) | 1.0000   |                  |           |
| C(21)-C(22)  | 1.532(8) | C(2)-O(1)-H(1C)  | 109.5     |
| C(21)-H(21A) | 1.0000   | C(3)-O(2)-H(2B)  | 109.5     |
| C(22)-C(23)  | 1.516(8) | C(4)-O(3)-H(3B)  | 109.5     |
| C(22)-H(22A) | 1.0000   | C(5)-O(4)-H(4B)  | 109.5     |
| C(23)-H(23A) | 0.9900   | C(6)-O(5)-H(5B)  | 109.5     |
| C(23)-H(23B) | 0.9900   | C(1)-N(1)-C(7)   | 113.8(4)  |
| C(24)-C(25)  | 1.505(8) | C(1)-N(1)-C(8)   | 112.8(4)  |
| C(24)-H(24A) | 0.9900   | C(7)-N(1)-C(8)   | 114.9(5)  |
| C(24)-H(24B) | 0.9900   | N(1)-C(1)-C(2)   | 114.0(4)  |
| C(25)-C(26)  | 1.524(8) | N(1)-C(1)-H(1A)  | 108.7     |
| C(25)-H(25A) | 0.9900   | C(2)-C(1)-H(1A)  | 108.7     |
| C(25)-H(25B) | 0.9900   | N(1)-C(1)-H(1B)  | 108.7     |
| C(26)-C(27)  | 1.515(9) | C(2)-C(1)-H(1B)  | 108.7     |
| C(26)-H(26A) | 0.9900   | H(1A)-C(1)-H(1B) | 107.6     |
| C(26)-H(26B) | 0.9900   | O(1)-C(2)-C(1)   | 105.6(4)  |
| C(27)-C(28)  | 1.509(9) | O(1)-C(2)-C(3)   | 108.3(5)  |
| C(27)-H(27A) | 0.9900   | C(1)-C(2)-C(3)   | 115.0(4)  |
| C(27)-H(27B) | 0.9900   | O(1)-C(2)-H(2A)  | 109.3     |
| C(28)-C(29)  | 1.502(9) | C(1)-C(2)-H(2A)  | 109.3     |
| C(28)-H(28A) | 0.9900   | C(3)-C(2)-H(2A)  | 109.3     |
| C(28)-H(28B) | 0.9900   | O(2)-C(3)-C(4)   | 105.4(4)  |
| C(29)-C(30)  | 1.523(9) | O(2)-C(3)-C(2)   | 108.6(4)  |
| C(29)-H(29A) | 0.9900   | C(4)-C(3)-C(2)   | 118.8(5)  |
| C(29)-H(29B) | 0.9900   | O(2)-C(3)-H(3A)  | 107.9     |
| C(30)-C(31)  | 1.517(9) | C(4)-C(3)-H(3A)  | 107.9     |
| C(30)-H(30A) | 0.9900   | C(2)-C(3)-H(3A)  | 107.9     |
| C(30)-H(30B) | 0.9900   | O(3)-C(4)-C(3)   | 110.9(4)  |

|                  |          |                     |          |
|------------------|----------|---------------------|----------|
| O(3)-C(4)-C(5)   | 113.2(4) | C(11)-C(10)-H(10A)  | 109.0    |
| C(3)-C(4)-C(5)   | 114.3(4) | C(9)-C(10)-H(10A)   | 109.0    |
| O(3)-C(4)-H(4A)  | 105.9    | C(11)-C(10)-H(10B)  | 109.0    |
| C(3)-C(4)-H(4A)  | 105.9    | C(9)-C(10)-H(10B)   | 109.0    |
| C(5)-C(4)-H(4A)  | 105.9    | H(10A)-C(10)-H(10B) | 107.8    |
| O(4)-C(5)-C(6)   | 105.8(4) | C(12)-C(11)-C(10)   | 115.1(6) |
| O(4)-C(5)-C(4)   | 110.1(4) | C(12)-C(11)-H(11A)  | 108.5    |
| C(6)-C(5)-C(4)   | 118.4(5) | C(10)-C(11)-H(11A)  | 108.5    |
| O(4)-C(5)-H(5A)  | 107.4    | C(12)-C(11)-H(11B)  | 108.5    |
| C(6)-C(5)-H(5A)  | 107.4    | C(10)-C(11)-H(11B)  | 108.5    |
| C(4)-C(5)-H(5A)  | 107.4    | H(11A)-C(11)-H(11B) | 107.5    |
| O(5)-C(6)-C(7)   | 109.0(5) | C(11)-C(12)-C(13)   | 114.0(6) |
| O(5)-C(6)-C(5)   | 108.9(5) | C(11)-C(12)-H(12A)  | 108.7    |
| C(7)-C(6)-C(5)   | 117.1(5) | C(13)-C(12)-H(12A)  | 108.7    |
| O(5)-C(6)-H(6A)  | 107.1    | C(11)-C(12)-H(12B)  | 108.7    |
| C(7)-C(6)-H(6A)  | 107.1    | C(13)-C(12)-H(12B)  | 108.7    |
| C(5)-C(6)-H(6A)  | 107.1    | H(12A)-C(12)-H(12B) | 107.6    |
| N(1)-C(7)-C(6)   | 112.7(5) | C(14)-C(13)-C(12)   | 114.2(7) |
| N(1)-C(7)-H(7A)  | 109.1    | C(14)-C(13)-H(13A)  | 108.7    |
| C(6)-C(7)-H(7A)  | 109.1    | C(12)-C(13)-H(13A)  | 108.7    |
| N(1)-C(7)-H(7B)  | 109.1    | C(14)-C(13)-H(13B)  | 108.7    |
| C(6)-C(7)-H(7B)  | 109.1    | C(12)-C(13)-H(13B)  | 108.7    |
| H(7A)-C(7)-H(7B) | 107.8    | H(13A)-C(13)-H(13B) | 107.6    |
| N(1)-C(8)-C(9)   | 118.5(5) | C(13)-C(14)-C(15)   | 113.7(7) |
| N(1)-C(8)-H(8A)  | 107.7    | C(13)-C(14)-H(14A)  | 108.8    |
| C(9)-C(8)-H(8A)  | 107.7    | C(15)-C(14)-H(14A)  | 108.8    |
| N(1)-C(8)-H(8B)  | 107.7    | C(13)-C(14)-H(14B)  | 108.8    |
| C(9)-C(8)-H(8B)  | 107.7    | C(15)-C(14)-H(14B)  | 108.8    |
| H(8A)-C(8)-H(8B) | 107.1    | H(14A)-C(14)-H(14B) | 107.7    |
| C(8)-C(9)-C(10)  | 110.9(5) | C(16)-C(15)-C(14)   | 114.0(8) |
| C(8)-C(9)-H(9A)  | 109.5    | C(16)-C(15)-H(15A)  | 108.7    |
| C(10)-C(9)-H(9A) | 109.5    | C(14)-C(15)-H(15A)  | 108.7    |
| C(8)-C(9)-H(9B)  | 109.5    | C(16)-C(15)-H(15B)  | 108.7    |
| C(10)-C(9)-H(9B) | 109.5    | C(14)-C(15)-H(15B)  | 108.7    |
| H(9A)-C(9)-H(9B) | 108.0    | H(15A)-C(15)-H(15B) | 107.6    |
| C(11)-C(10)-C(9) | 113.1(6) | C(15)-C(16)-H(16A)  | 109.5    |

|                     |          |                     |          |
|---------------------|----------|---------------------|----------|
| C(15)-C(16)-H(16B)  | 109.5    | C(19)-C(20)-H(20A)  | 105.7    |
| H(16A)-C(16)-H(16B) | 109.5    | O(9)-C(21)-C(22)    | 109.4(4) |
| C(15)-C(16)-H(16C)  | 109.5    | O(9)-C(21)-C(20)    | 107.7(4) |
| H(16A)-C(16)-H(16C) | 109.5    | C(22)-C(21)-C(20)   | 118.6(5) |
| H(16B)-C(16)-H(16C) | 109.5    | O(9)-C(21)-H(21A)   | 106.9    |
| C(18)-O(6)-H(6B)    | 109.5    | C(22)-C(21)-H(21A)  | 106.9    |
| C(19)-O(7)-H(7C)    | 109.5    | C(20)-C(21)-H(21A)  | 106.9    |
| C(20)-O(8)-H(8C)    | 109.5    | O(10)-C(22)-C(23)   | 108.3(5) |
| C(21)-O(9)-H(9C)    | 109.5    | O(10)-C(22)-C(21)   | 111.9(4) |
| C(22)-O(10)-H(10C)  | 109.5    | C(23)-C(22)-C(21)   | 115.7(5) |
| C(24)-N(2)-C(23)    | 111.4(4) | O(10)-C(22)-H(22A)  | 106.8    |
| C(24)-N(2)-C(17)    | 111.6(5) | C(23)-C(22)-H(22A)  | 106.8    |
| C(23)-N(2)-C(17)    | 113.0(5) | C(21)-C(22)-H(22A)  | 106.8    |
| N(2)-C(17)-C(18)    | 115.1(5) | N(2)-C(23)-C(22)    | 112.4(5) |
| N(2)-C(17)-H(17A)   | 108.5    | N(2)-C(23)-H(23A)   | 109.1    |
| C(18)-C(17)-H(17A)  | 108.5    | C(22)-C(23)-H(23A)  | 109.1    |
| N(2)-C(17)-H(17B)   | 108.5    | N(2)-C(23)-H(23B)   | 109.1    |
| C(18)-C(17)-H(17B)  | 108.5    | C(22)-C(23)-H(23B)  | 109.1    |
| H(17A)-C(17)-H(17B) | 107.5    | H(23A)-C(23)-H(23B) | 107.9    |
| O(6)-C(18)-C(19)    | 107.3(5) | N(2)-C(24)-C(25)    | 114.7(5) |
| O(6)-C(18)-C(17)    | 105.9(5) | N(2)-C(24)-H(24A)   | 108.6    |
| C(19)-C(18)-C(17)   | 117.5(5) | C(25)-C(24)-H(24A)  | 108.6    |
| O(6)-C(18)-H(18A)   | 108.6    | N(2)-C(24)-H(24B)   | 108.6    |
| C(19)-C(18)-H(18A)  | 108.6    | C(25)-C(24)-H(24B)  | 108.6    |
| C(17)-C(18)-H(18A)  | 108.6    | H(24A)-C(24)-H(24B) | 107.6    |
| O(7)-C(19)-C(18)    | 107.2(4) | C(24)-C(25)-C(26)   | 110.5(5) |
| O(7)-C(19)-C(20)    | 107.6(4) | C(24)-C(25)-H(25A)  | 109.6    |
| C(18)-C(19)-C(20)   | 116.9(5) | C(26)-C(25)-H(25A)  | 109.6    |
| O(7)-C(19)-H(19A)   | 108.3    | C(24)-C(25)-H(25B)  | 109.6    |
| C(18)-C(19)-H(19A)  | 108.3    | C(26)-C(25)-H(25B)  | 109.6    |
| C(20)-C(19)-H(19A)  | 108.3    | H(25A)-C(25)-H(25B) | 108.1    |
| O(8)-C(20)-C(21)    | 115.6(4) | C(27)-C(26)-C(25)   | 114.1(6) |
| O(8)-C(20)-C(19)    | 109.9(4) | C(27)-C(26)-H(26A)  | 108.7    |
| C(21)-C(20)-C(19)   | 113.3(4) | C(25)-C(26)-H(26A)  | 108.7    |
| O(8)-C(20)-H(20A)   | 105.7    | C(27)-C(26)-H(26B)  | 108.7    |
| C(21)-C(20)-H(20A)  | 105.7    | C(25)-C(26)-H(26B)  | 108.7    |



|                     |          |                     |          |
|---------------------|----------|---------------------|----------|
| H(26A)-C(26)-H(26B) | 107.6    | C(31)-C(30)-H(30A)  | 108.6    |
| C(28)-C(27)-C(26)   | 114.3(6) | C(29)-C(30)-H(30A)  | 108.6    |
| C(28)-C(27)-H(27A)  | 108.7    | C(31)-C(30)-H(30B)  | 108.6    |
| C(26)-C(27)-H(27A)  | 108.7    | C(29)-C(30)-H(30B)  | 108.6    |
| C(28)-C(27)-H(27B)  | 108.7    | H(30A)-C(30)-H(30B) | 107.5    |
| C(26)-C(27)-H(27B)  | 108.7    | C(32)-C(31)-C(30)   | 112.6(7) |
| H(27A)-C(27)-H(27B) | 107.6    | C(32)-C(31)-H(31A)  | 109.1    |
| C(29)-C(28)-C(27)   | 115.5(6) | C(30)-C(31)-H(31A)  | 109.1    |
| C(29)-C(28)-H(28A)  | 108.4    | C(32)-C(31)-H(31B)  | 109.1    |
| C(27)-C(28)-H(28A)  | 108.4    | C(30)-C(31)-H(31B)  | 109.1    |
| C(29)-C(28)-H(28B)  | 108.4    | H(31A)-C(31)-H(31B) | 107.8    |
| C(27)-C(28)-H(28B)  | 108.4    | C(31)-C(32)-H(32A)  | 109.5    |
| H(28A)-C(28)-H(28B) | 107.5    | C(31)-C(32)-H(32B)  | 109.5    |
| C(28)-C(29)-C(30)   | 115.4(6) | H(32A)-C(32)-H(32B) | 109.5    |
| C(28)-C(29)-H(29A)  | 108.4    | C(31)-C(32)-H(32C)  | 109.5    |
| C(30)-C(29)-H(29A)  | 108.4    | H(32A)-C(32)-H(32C) | 109.5    |
| C(28)-C(29)-H(29B)  | 108.4    | H(32B)-C(32)-H(32C) | 109.5    |
| C(30)-C(29)-H(29B)  | 108.4    | H(11C)-O(11)-H(11D) | 102.2    |
| H(29A)-C(29)-H(29B) | 107.5    |                     |          |
| C(31)-C(30)-C(29)   | 114.9(6) |                     |          |

---

Symmetry transformations used to generate equivalent atoms:

**Table 4.** Anisotropic displacement parameters ( $\text{\AA}^2 \times 10^3$ ) for 08001. The anisotropic displacement factor exponent takes the form:  $-2\pi^2 [ h^2 a^{*2} U_{11} + \dots + 2 h k a^* b^* U_{12} ]$

|     | $U_{11}$ | $U_{22}$ | $U_{33}$ | $U_{23}$ | $U_{13}$ | $U_{12}$ |
|-----|----------|----------|----------|----------|----------|----------|
| O1  | 35(2)    | 22(2)    | 31(2)    | -3(2)    | 8(2)     | -8(2)    |
| O2  | 26(2)    | 22(2)    | 34(2)    | -3(2)    | 5(2)     | -3(2)    |
| O3  | 20(2)    | 22(2)    | 33(2)    | 5(2)     | -6(2)    | -4(2)    |
| O4  | 26(2)    | 28(2)    | 26(2)    | -6(2)    | 8(2)     | -5(2)    |
| O5  | 21(2)    | 20(2)    | 30(2)    | 3(2)     | -5(2)    | -1(2)    |
| N1  | 27(3)    | 15(2)    | 21(2)    | -6(2)    | 4(2)     | -5(2)    |
| C1  | 30(3)    | 20(3)    | 25(3)    | -8(3)    | 5(3)     | -6(3)    |
| C2  | 15(3)    | 22(3)    | 24(3)    | -6(2)    | 4(2)     | -5(2)    |
| C3  | 28(3)    | 18(3)    | 21(3)    | -4(2)    | -3(2)    | -4(2)    |
| C4  | 18(3)    | 21(3)    | 28(3)    | -1(3)    | 4(2)     | -3(2)    |
| C5  | 26(3)    | 19(3)    | 19(3)    | 0(2)     | 7(2)     | 0(2)     |
| C6  | 15(3)    | 23(3)    | 28(3)    | 4(3)     | -2(2)    | 0(2)     |
| C7  | 27(3)    | 19(3)    | 34(4)    | -6(3)    | 2(3)     | 0(3)     |
| C8  | 29(3)    | 27(3)    | 33(3)    | -12(3)   | -2(3)    | -4(3)    |
| C9  | 31(3)    | 23(3)    | 39(4)    | -6(3)    | -1(3)    | 3(3)     |
| C10 | 46(4)    | 27(3)    | 40(4)    | -9(3)    | -3(3)    | -3(3)    |
| C11 | 51(4)    | 28(4)    | 43(4)    | -6(3)    | -5(3)    | -2(3)    |
| C12 | 46(4)    | 45(4)    | 32(4)    | -10(4)   | 2(3)     | -4(4)    |
| C13 | 56(5)    | 42(4)    | 49(4)    | -10(4)   | -14(4)   | 7(4)     |
| C14 | 51(4)    | 62(5)    | 39(4)    | -3(4)    | -3(3)    | -6(4)    |
| C15 | 61(5)    | 62(6)    | 49(5)    | -7(4)    | -16(4)   | 10(4)    |
| C16 | 57(5)    | 103(8)   | 35(4)    | -3(5)    | 2(4)     | -8(5)    |
| O6  | 19(2)    | 14(2)    | 49(3)    | 2(2)     | -3(2)    | -4(2)    |
| O7  | 26(2)    | 22(2)    | 33(2)    | -8(2)    | 0(2)     | -6(2)    |
| O8  | 21(2)    | 22(2)    | 27(2)    | -1(2)    | -3(2)    | -4(2)    |
| O9  | 24(2)    | 27(2)    | 37(3)    | 11(2)    | 8(2)     | 1(2)     |
| O10 | 27(2)    | 18(2)    | 43(3)    | -3(2)    | -6(2)    | -4(2)    |
| N2  | 29(3)    | 21(3)    | 22(3)    | -3(2)    | 0(2)     | 2(2)     |
| C17 | 21(3)    | 20(3)    | 30(3)    | 6(3)     | 2(2)     | 1(2)     |
| C18 | 22(3)    | 12(3)    | 32(3)    | 1(3)     | 0(3)     | -3(2)    |
| C19 | 20(3)    | 19(3)    | 28(3)    | -4(3)    | 0(2)     | -5(2)    |

|     |       |       |       |       |        |        |
|-----|-------|-------|-------|-------|--------|--------|
| C20 | 21(3) | 11(3) | 25(3) | -1(3) | 0(2)   | -1(2)  |
| C21 | 24(3) | 17(3) | 26(3) | 3(3)  | 3(2)   | -2(3)  |
| C22 | 20(3) | 15(3) | 29(3) | 2(3)  | -3(3)  | 0(2)   |
| C23 | 24(3) | 24(3) | 21(3) | -1(3) | 0(2)   | 6(3)   |
| C24 | 35(3) | 38(4) | 23(3) | -1(3) | 4(3)   | 7(3)   |
| C25 | 40(4) | 39(4) | 29(3) | -5(3) | -3(3)  | 8(3)   |
| C26 | 47(4) | 57(5) | 25(3) | -6(4) | -3(3)  | 3(4)   |
| C27 | 49(4) | 50(5) | 37(4) | 1(3)  | -7(3)  | 8(4)   |
| C28 | 39(4) | 76(6) | 35(4) | -5(4) | -5(3)  | 5(4)   |
| C29 | 45(4) | 55(5) | 33(4) | -2(3) | -10(3) | 3(4)   |
| C30 | 48(4) | 56(5) | 32(4) | -1(4) | -3(3)  | 3(4)   |
| C31 | 60(5) | 50(5) | 35(4) | -2(4) | -12(4) | -6(4)  |
| C32 | 87(6) | 57(5) | 37(4) | -5(4) | -21(4) | -12(5) |
| O11 | 29(2) | 19(2) | 30(2) | 0(2)  | 2(2)   | 0(2)   |

---

**Table 5.** Hydrogen coordinates ( $\times 10^4$ ) and isotropic displacement parameters ( $\text{\AA}^2 \times 10^3$ ) for 08001.

|      | x    | y     | z     | U(eq) |
|------|------|-------|-------|-------|
| H1C  | 1209 | -234  | 6989  | 44    |
| H2B  | 1947 | -1036 | 6329  | 41    |
| H3B  | 5470 | 2847  | 6418  | 37    |
| H4B  | 5374 | 2282  | 5164  | 39    |
| H5B  | 5578 | 4068  | 6019  | 36    |
| H1A  | 1861 | 3718  | 7270  | 30    |
| H1B  | 3014 | 2628  | 7556  | 30    |
| H2A  | 1691 | 2043  | 6388  | 24    |
| H3A  | 3658 | -22   | 6942  | 27    |
| H4A  | 4737 | 199   | 5972  | 27    |
| H5A  | 2937 | 1943  | 5516  | 25    |
| H6A  | 3460 | 4654  | 5343  | 26    |
| H7A  | 3181 | 6002  | 6283  | 32    |
| H7B  | 2177 | 4525  | 6205  | 32    |
| H8A  | 4776 | 5987  | 7069  | 36    |
| H8B  | 4655 | 4718  | 7625  | 36    |
| H9A  | 2603 | 5886  | 7850  | 38    |
| H9B  | 2832 | 7229  | 7323  | 38    |
| H10A | 4807 | 8006  | 7900  | 45    |
| H10B | 3498 | 8487  | 8229  | 45    |
| H11A | 3707 | 6232  | 8898  | 49    |
| H11B | 4955 | 5622  | 8547  | 49    |
| H12A | 4873 | 8555  | 9262  | 49    |
| H12B | 6124 | 7902  | 8924  | 49    |
| H13A | 4948 | 6297  | 9944  | 59    |
| H13B | 6153 | 5561  | 9592  | 59    |
| H14A | 6229 | 8532  | 10281 | 61    |
| H14B | 7434 | 7773  | 9935  | 61    |
| H15A | 6227 | 6305  | 10974 | 69    |
| H15B | 7381 | 5465  | 10616 | 69    |

|      |       |       |       |    |
|------|-------|-------|-------|----|
| H16A | 8256  | 6640  | 11497 | 98 |
| H16B | 7576  | 8354  | 11340 | 98 |
| H16C | 8726  | 7711  | 10925 | 98 |
| H6B  | 6884  | 3658  | 6139  | 41 |
| H7C  | 8242  | 4501  | 5274  | 41 |
| H8C  | 9982  | 7617  | 6708  | 35 |
| H9C  | 9777  | 9797  | 5193  | 44 |
| H10C | 9350  | 11355 | 6256  | 44 |
| H17A | 7215  | 5739  | 7167  | 28 |
| H17B | 8733  | 5413  | 7156  | 28 |
| H18A | 7122  | 6137  | 6090  | 27 |
| H19A | 9747  | 5123  | 6030  | 26 |
| H20A | 10142 | 7655  | 5496  | 23 |
| H21A | 7764  | 8306  | 5498  | 27 |
| H22A | 7250  | 10599 | 6055  | 26 |
| H23A | 6934  | 9625  | 7046  | 28 |
| H23B | 6627  | 8201  | 6554  | 28 |
| H24A | 7549  | 7776  | 7935  | 38 |
| H24B | 8372  | 9378  | 7795  | 38 |
| H25A | 10294 | 7778  | 7880  | 43 |
| H25B | 9436  | 6235  | 8068  | 43 |
| H26A | 9576  | 9215  | 8768  | 52 |
| H26B | 8737  | 7662  | 8956  | 52 |
| H27A | 10660 | 6132  | 9119  | 55 |
| H27B | 11488 | 7705  | 8944  | 55 |
| H28A | 10735 | 9074  | 9824  | 60 |
| H28B | 9910  | 7501  | 9999  | 60 |
| H29A | 12648 | 7564  | 9999  | 53 |
| H29B | 11808 | 6019  | 10191 | 53 |
| H30A | 11957 | 9008  | 10874 | 54 |
| H30B | 11075 | 7497  | 11063 | 54 |
| H31A | 12952 | 5897  | 11257 | 59 |
| H31B | 13831 | 7421  | 11073 | 59 |
| H32A | 13740 | 7222  | 12158 | 91 |
| H32B | 12200 | 7373  | 12116 | 91 |
| H32C | 13079 | 8897  | 11933 | 91 |

|      |      |      |      |    |
|------|------|------|------|----|
| H11C | 7564 | 2984 | 4500 | 39 |
| H11D | 7769 | 1840 | 5037 | 39 |

---

**Table 6.** Torsion angles [°] for 08001.

|                 |           |                 |           |
|-----------------|-----------|-----------------|-----------|
| C7-N1-C1-C2     | 56.9(6)   | C23-N2-C17-C18  | 52.1(6)   |
| C8-N1-C1-C2     | -169.9(5) | N2-C17-C18-O6   | -179.2(4) |
| N1-C1-C2-O1     | 177.9(5)  | N2-C17-C18-C19  | 61.0(7)   |
| N1-C1-C2-C3     | 58.6(7)   | O6-C18-C19-O7   | 63.8(6)   |
| O1-C2-C3-O2     | 61.4(5)   | C17-C18-C19-O7  | -177.1(5) |
| C1-C2-C3-O2     | 179.2(5)  | O6-C18-C19-C20  | -175.3(5) |
| O1-C2-C3-C4     | -178.2(4) | C17-C18-C19-C20 | -56.3(7)  |
| C1-C2-C3-C4     | -60.5(7)  | O7-C19-C20-O8   | -159.1(4) |
| O2-C3-C4-O3     | -154.1(4) | C18-C19-C20-O8  | 80.2(6)   |
| C2-C3-C4-O3     | 84.0(6)   | O7-C19-C20-C21  | 69.8(5)   |
| O2-C3-C4-C5     | 76.5(6)   | C18-C19-C20-C21 | -50.8(7)  |
| C2-C3-C4-C5     | -45.5(7)  | O8-C20-C21-O9   | 95.9(5)   |
| O3-C4-C5-O4     | 90.0(5)   | C19-C20-C21-O9  | -135.9(5) |
| C3-C4-C5-O4     | -141.7(5) | O8-C20-C21-C22  | -28.9(7)  |
| O3-C4-C5-C6     | -31.8(7)  | C19-C20-C21-C22 | 99.3(6)   |
| C3-C4-C5-C6     | 96.5(6)   | O9-C21-C22-O10  | -57.8(6)  |
| O4-C5-C6-O5     | -56.0(6)  | C20-C21-C22-O10 | 66.1(6)   |
| C4-C5-C6-O5     | 67.9(6)   | O9-C21-C22-C23  | 177.5(4)  |
| O4-C5-C6-C7     | 179.7(4)  | C20-C21-C22-C23 | -58.6(7)  |
| C4-C5-C6-C7     | -56.3(7)  | C24-N2-C23-C22  | 120.4(5)  |
| C1-N1-C7-C6     | -113.2(5) | C17-N2-C23-C22  | -113.0(5) |
| C8-N1-C7-C6     | 114.6(5)  | O10-C22-C23-N2  | -63.0(6)  |
| O5-C6-C7-N1     | -65.5(6)  | C21-C22-C23-N2  | 63.5(7)   |
| C5-C6-C7-N1     | 58.7(7)   | C23-N2-C24-C25  | -165.6(5) |
| C1-N1-C8-C9     | -58.1(7)  | C17-N2-C24-C25  | 67.0(7)   |
| C7-N1-C8-C9     | 74.5(7)   | N2-C24-C25-C26  | 175.7(6)  |
| N1-C8-C9-C10    | 175.0(5)  | C24-C25-C26-C27 | -179.2(6) |
| C8-C9-C10-C11   | -73.0(7)  | C25-C26-C27-C28 | -178.7(7) |
| C9-C10-C11-C12  | 175.3(6)  | C26-C27-C28-C29 | -179.9(7) |
| C10-C11-C12-C13 | 178.4(6)  | C27-C28-C29-C30 | 178.3(7)  |
| C11-C12-C13-C14 | 176.9(6)  | C28-C29-C30-C31 | 178.1(7)  |
| C12-C13-C14-C15 | 179.2(6)  | C29-C30-C31-C32 | -179.5(7) |
| C13-C14-C15-C16 | 176.8(7)  |                 |           |
| C24-N2-C17-C18  | 178.6(4)  |                 |           |

**Table 7.** Hydrogen bonds for 08001 [ $\text{\AA}$  and  $^\circ$ ].

| D-H...A         | d(D-H) | d(H...A) | d(D...A) | $\angle(\text{DHA})$ |
|-----------------|--------|----------|----------|----------------------|
| O1-H1C...O8#1   | 0.84   | 2.14     | 2.924(5) | 155.5                |
| O1-H1C...O2     | 0.84   | 2.37     | 2.805(5) | 112.7                |
| O2-H2B...O8#1   | 0.84   | 1.86     | 2.662(5) | 159.6                |
| O2-H2B...O1     | 0.84   | 2.36     | 2.805(5) | 113.5                |
| O3-H3B...O5     | 0.84   | 2.06     | 2.825(5) | 150.9                |
| O3-H3B...O6     | 0.84   | 2.41     | 2.958(5) | 123.0                |
| O4-H4B...O11    | 0.84   | 2.03     | 2.811(5) | 153.8                |
| O5-H5B...O3     | 0.84   | 2.13     | 2.825(5) | 139.6                |
| O5-H5B...O6     | 0.84   | 2.20     | 2.847(5) | 134.0                |
| O6-H6B...O5     | 0.84   | 2.11     | 2.847(5) | 146.3                |
| O6-H6B...O3     | 0.84   | 2.37     | 2.958(5) | 127.8                |
| O7-H7C...O11    | 0.84   | 1.97     | 2.767(5) | 157.6                |
| O7-H7C...O6     | 0.84   | 2.33     | 2.762(6) | 112.1                |
| O8-H8C...N2     | 0.84   | 1.98     | 2.654(6) | 137.2                |
| O9-H9C...O7#2   | 0.84   | 1.98     | 2.719(5) | 145.9                |
| O10-H10C...O9   | 0.84   | 2.44     | 2.861(6) | 111.7                |
| O11-H11C...O2#3 | 1.07   | 1.81     | 2.781(5) | 149.8                |
| O11-H11D...O9#4 | 0.85   | 2.01     | 2.856(6) | 179.8                |

Symmetry transformations used to generate equivalent atoms:

#1  $x-1, y-1, z$  #2  $-x+2, y+1/2, -z+1$  #3  $-x+1, y+1/2, -z+1$

#4  $x, y-1, z$



## checkCIF/PLATON report

No syntax errors found.            CIF dictionary            Interpreting this report

**Datablock:** 08001

**Bond precision:** C-C = 0.0092 A      Wavelength=0.71073

**Cell:** a=10.3632(13)            b=8.1773(10)            c=21.547(3)  
          alpha=90                    beta=91.751(2)            gamma=90

|                        | Calculated                                                            | Reported                                                              |
|------------------------|-----------------------------------------------------------------------|-----------------------------------------------------------------------|
| Volume                 | 1825.1(4)                                                             | 1825.1(4)                                                             |
| Space group            | P 21                                                                  | P2(1)                                                                 |
| Hall group             | P 2yb                                                                 | ?                                                                     |
| Moiety formula         | 2(C <sub>16</sub> H <sub>33</sub> NO <sub>5</sub> ), H <sub>2</sub> O | 2(C <sub>16</sub> H <sub>33</sub> NO <sub>5</sub> ), H <sub>2</sub> O |
| Sum formula            | C <sub>32</sub> H <sub>68</sub> N <sub>2</sub> O <sub>11</sub>        | C <sub>32</sub> H <sub>68</sub> N <sub>2</sub> O <sub>11</sub>        |
| Mr                     | 656.88                                                                | 656.88                                                                |
| Dx,g cm <sup>-3</sup>  | 1.195                                                                 | 1.195                                                                 |
| Z                      | 2                                                                     | 2                                                                     |
| Mu (mm <sup>-1</sup> ) | 0.088                                                                 | 0.088                                                                 |
| F000                   | 724.0                                                                 | 724.0                                                                 |
| F000'                  | 724.38                                                                |                                                                       |
| h,k,lmax               | 12,9,25                                                               | 12,9,25                                                               |
| Nref                   | 3501( 6500)                                                           | 3487                                                                  |
| Tmin,Tmax              | 0.970,0.998                                                           | 0.970,0.998                                                           |
| Tmin'                  | 0.970                                                                 |                                                                       |

**Correction method= AbsCorr=MULTI-SCAN**

**Data completeness= 1.00(0.54) Theta(max)= 25.080**

**R(reflections)= 0.0527( 2408) wR2(reflections)= 0.1700( 3487)**

**S = 1.016      Npar= 408**

The following ALERTS were generated. Each ALERT has the format test-name\_ALERT\_alert-type\_alert-level.

### Alert level B

PLAT222\_ALERT\_3\_B Large Non-Solvent H Ueq(max)/Ueq(min) ... 4.08 Ratio  
PLAT416\_ALERT\_2\_B Short Intra D-H..H-D H1C .. H2B .. 1.76 Ang.  
PLAT416\_ALERT\_2\_B Short Intra D-H..H-D H3B .. H5B .. 1.32 Ang.  
PLAT417\_ALERT\_2\_B Short Inter D-H..H-D H2B .. H11C .. 2.04 Ang.  
PLAT417\_ALERT\_2\_B Short Inter D-H..H-D H3B .. H6B .. 1.73 Ang.  
PLAT417\_ALERT\_2\_B Short Inter D-H..H-D H5B .. H6B .. 1.41 Ang.

### Alert level C

STRVA01\_ALERT\_4\_C Flack test results are meaningless.  
From the CIF: `_refine_ls_abs_structure_Flack` 0.000  
From the CIF: `_refine_ls_abs_structure_Flack_su` 10.000  
PLAT032\_ALERT\_4\_C Std. Uncertainty in Flack Parameter too High ... 10.00  
PLAT066\_ALERT\_1\_C Predicted and Reported Transmissions Identical . ?  
PLAT220\_ALERT\_2\_C Large Non-Solvent C Ueq(max)/Ueq(min) ... 3.20 Ratio  
PLAT220\_ALERT\_2\_C Large Non-Solvent C Ueq(max)/Ueq(min) ... 3.21 Ratio  
PLAT222\_ALERT\_3\_C Large Non-Solvent H Ueq(max)/Ueq(min) ... 3.96 Ratio  
PLAT340\_ALERT\_3\_C Low Bond Precision on C-C Bonds (x 1000) Ang ... 9  
PLAT355\_ALERT\_3\_C Long O-H Bond (0.82A) O11 - H11C ... 1.07 Ang.  
PLAT414\_ALERT\_2\_C Short Intra D-H..H-X H9C .. H20A .. 1.90 Ang.  
PLAT850\_ALERT\_2\_C Check Flack Parameter Exact Value 0.00 and su .. 10.00

### Alert level G

REFLT03\_ALERT\_4\_G Please check that the estimate of the number of Friedel pairs is correct. If it is not, please give the correct count in the `_publ_section_exptl_refinement` section of the submitted CIF.

From the CIF: `_diffn_refl_theta_max` 25.08  
From the CIF: `_reflns_number_total` 3487  
Count of symmetry unique reflns 3501  
Completeness (`_total/calc`) 99.60%  
TEST3: Check Friedels for noncentro structure  
Estimate of Friedel pairs measured 0  
Fraction of Friedel pairs measured 0.000  
Are heavy atom types Z>Si present no  
PLAT791\_ALERT\_1\_G Confirm the Absolute Configuration of C2 ... S  
PLAT791\_ALERT\_1\_G Confirm the Absolute Configuration of C3 ... R  
PLAT791\_ALERT\_1\_G Confirm the Absolute Configuration of C5 ... R  
PLAT791\_ALERT\_1\_G Confirm the Absolute Configuration of C6 ... R  
PLAT791\_ALERT\_1\_G Confirm the Absolute Configuration of C18 ... S  
PLAT791\_ALERT\_1\_G Confirm the Absolute Configuration of C19 ... R  
PLAT791\_ALERT\_1\_G Confirm the Absolute Configuration of C21 ... R  
PLAT791\_ALERT\_1\_G Confirm the Absolute Configuration of C22 ... R

PLAT860\_ALERT\_3\_G Note: Number of Least-Squares Restraints ..... 1

0 ALERT level A = In general: serious problem

6 ALERT level B = Potentially serious problem

10 ALERT level C = Check and explain

10 ALERT level G = General alerts; check

9 ALERT type 1 CIF construction/syntax error, inconsistent or missing data

9 ALERT type 2 Indicator that the structure model may be wrong or deficient

5 ALERT type 3 Indicator that the structure quality may be low

3 ALERT type 4 Improvement, methodology, query or suggestion

0 ALERT type 5 Informative message, check

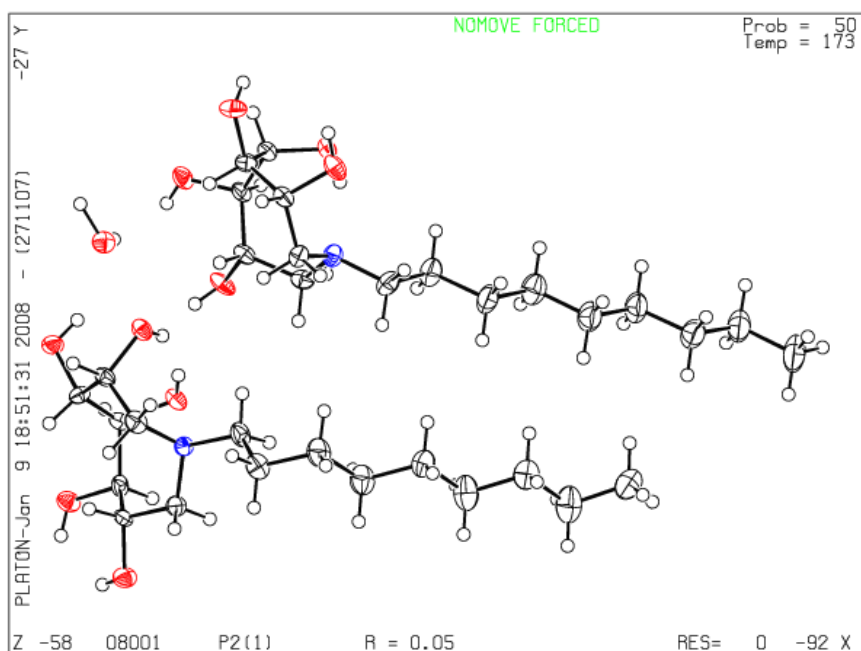

# 1H-NMR

JL-090307 1 1 C:\Bruker\TOPSPIN leex3451

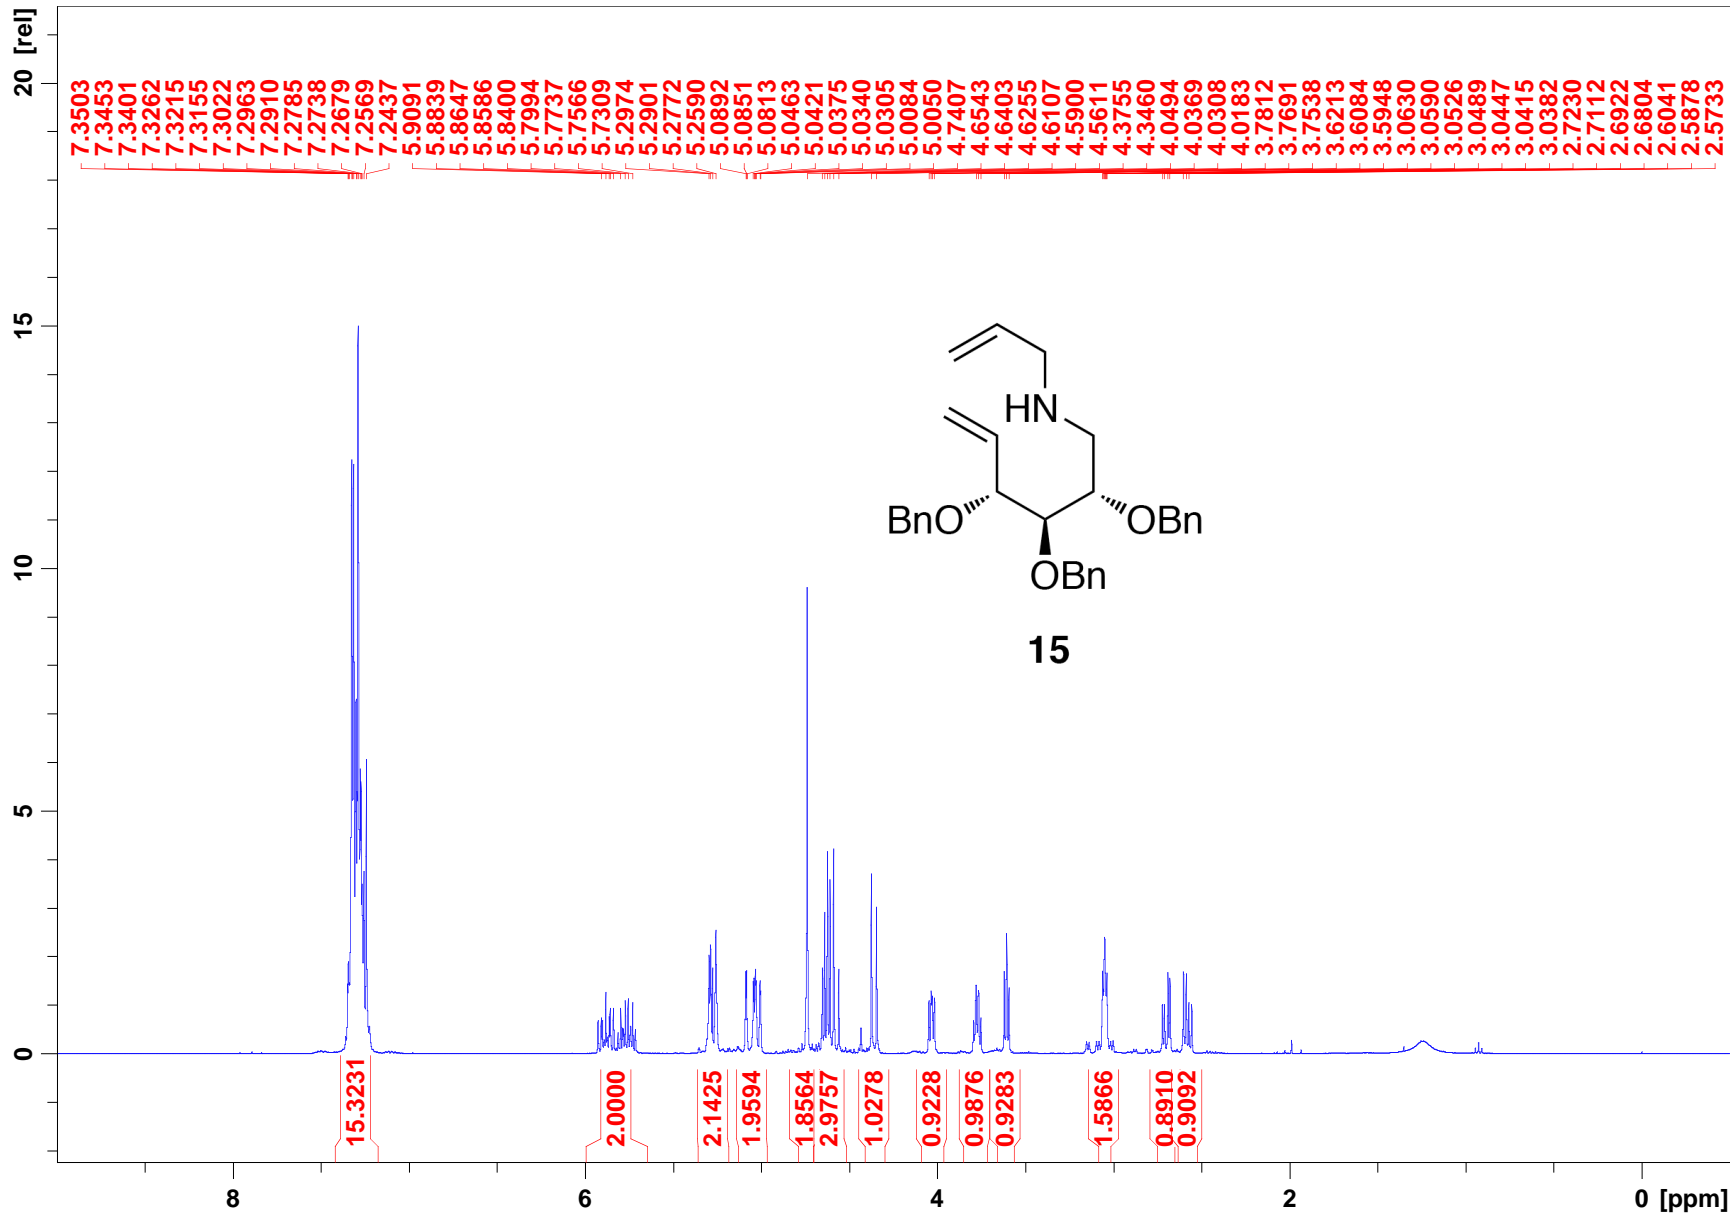

# 13C-NMR

JL-090307 3 1 C:\Bruker\TOPSPIN leex3451

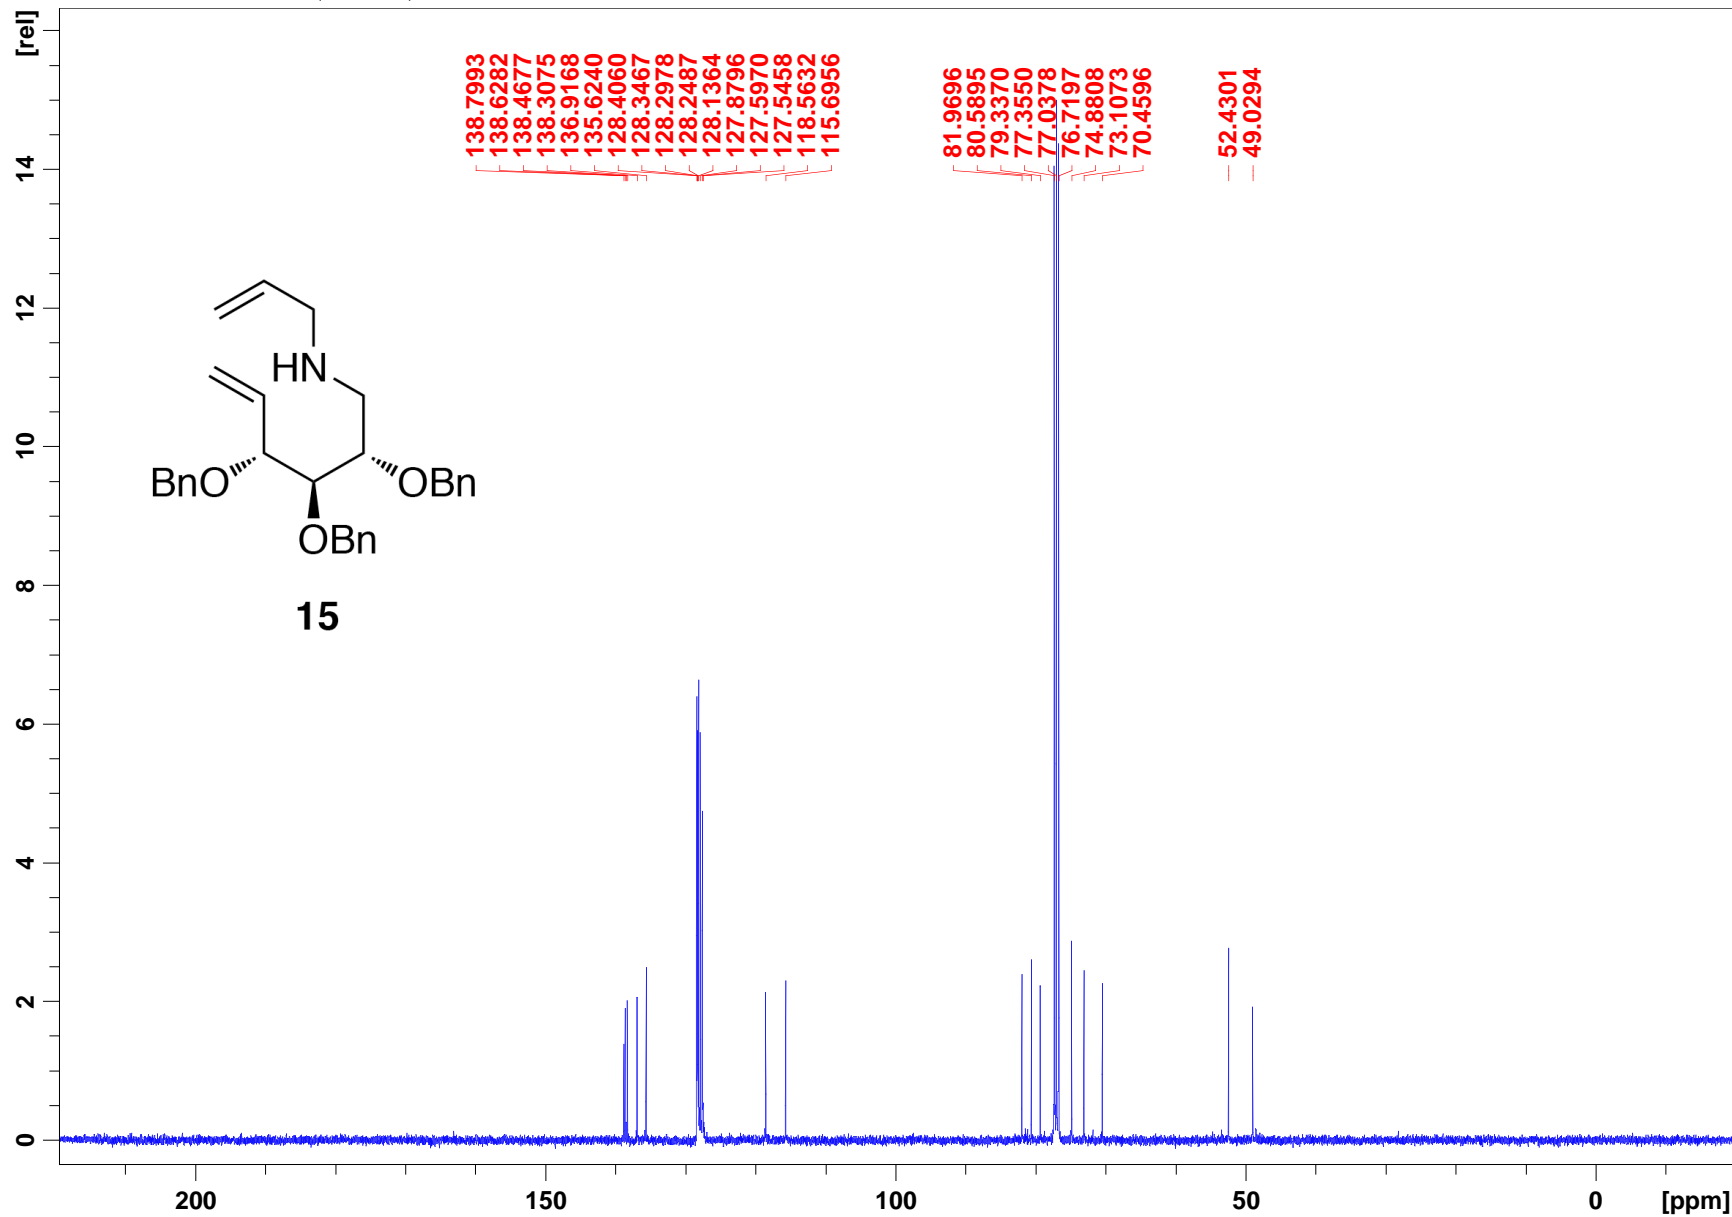

# 1H-NMR

JL-090507 1 1 C:\Bruker\TOPSPIN leex3451

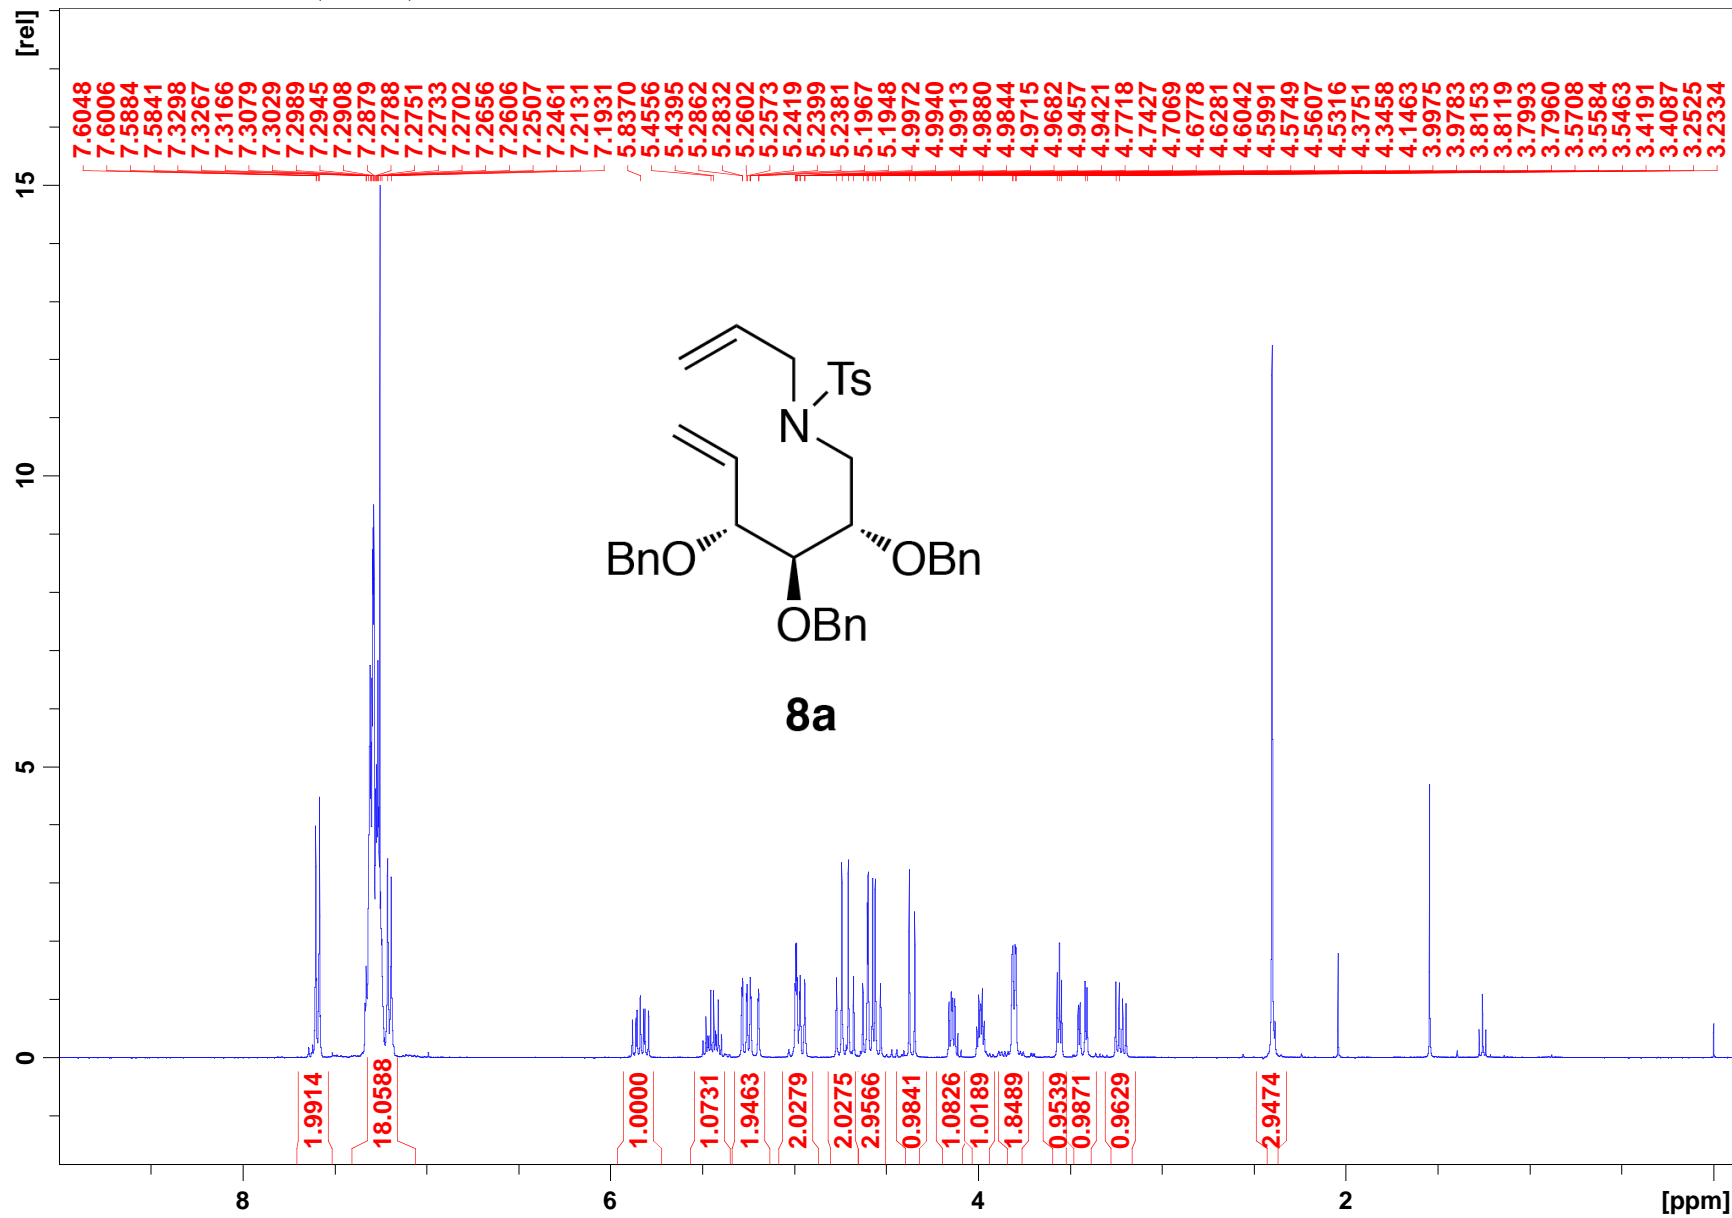

# 13C-NMR

JL-090507 4 1 C:\Bruker\TOPSPIN leex3451

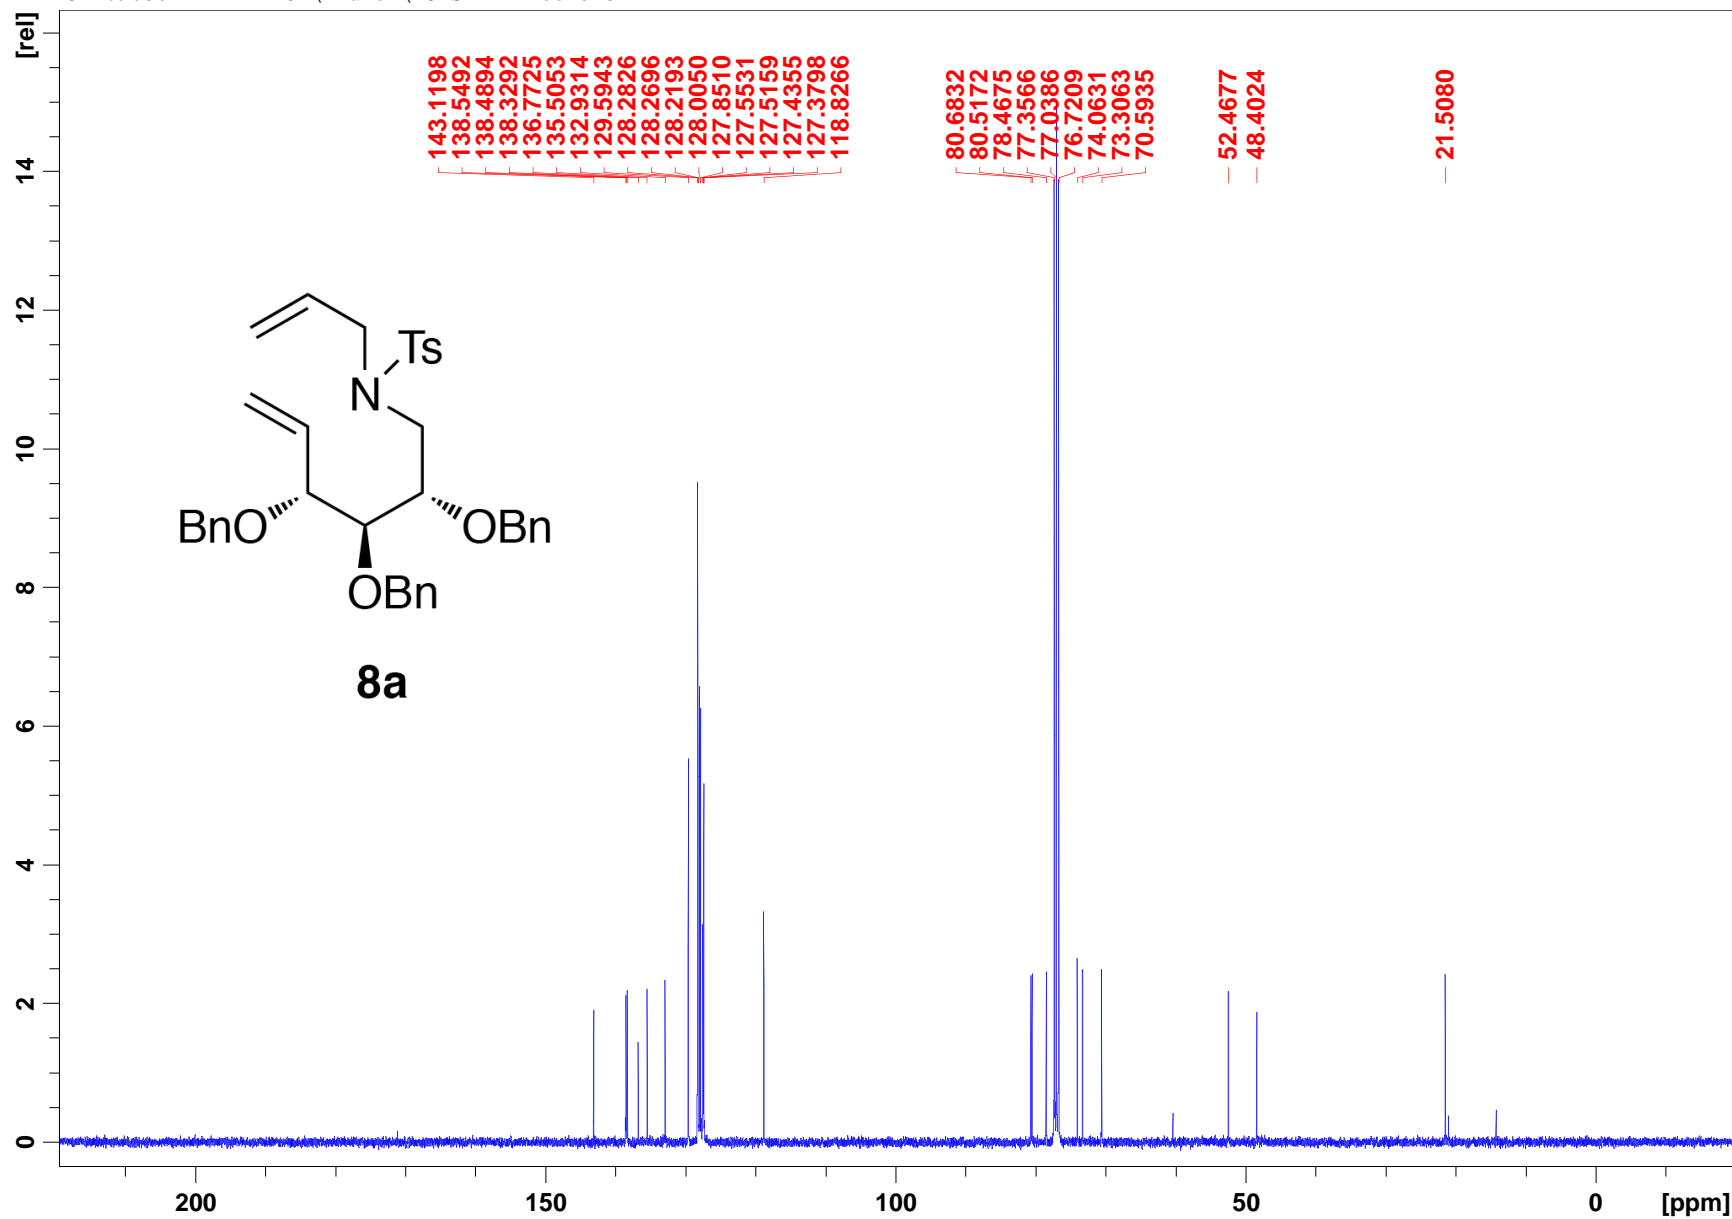

# 1H-NMR

JL-062207 1 1 C:\Bruker\TOPSPIN leex3451

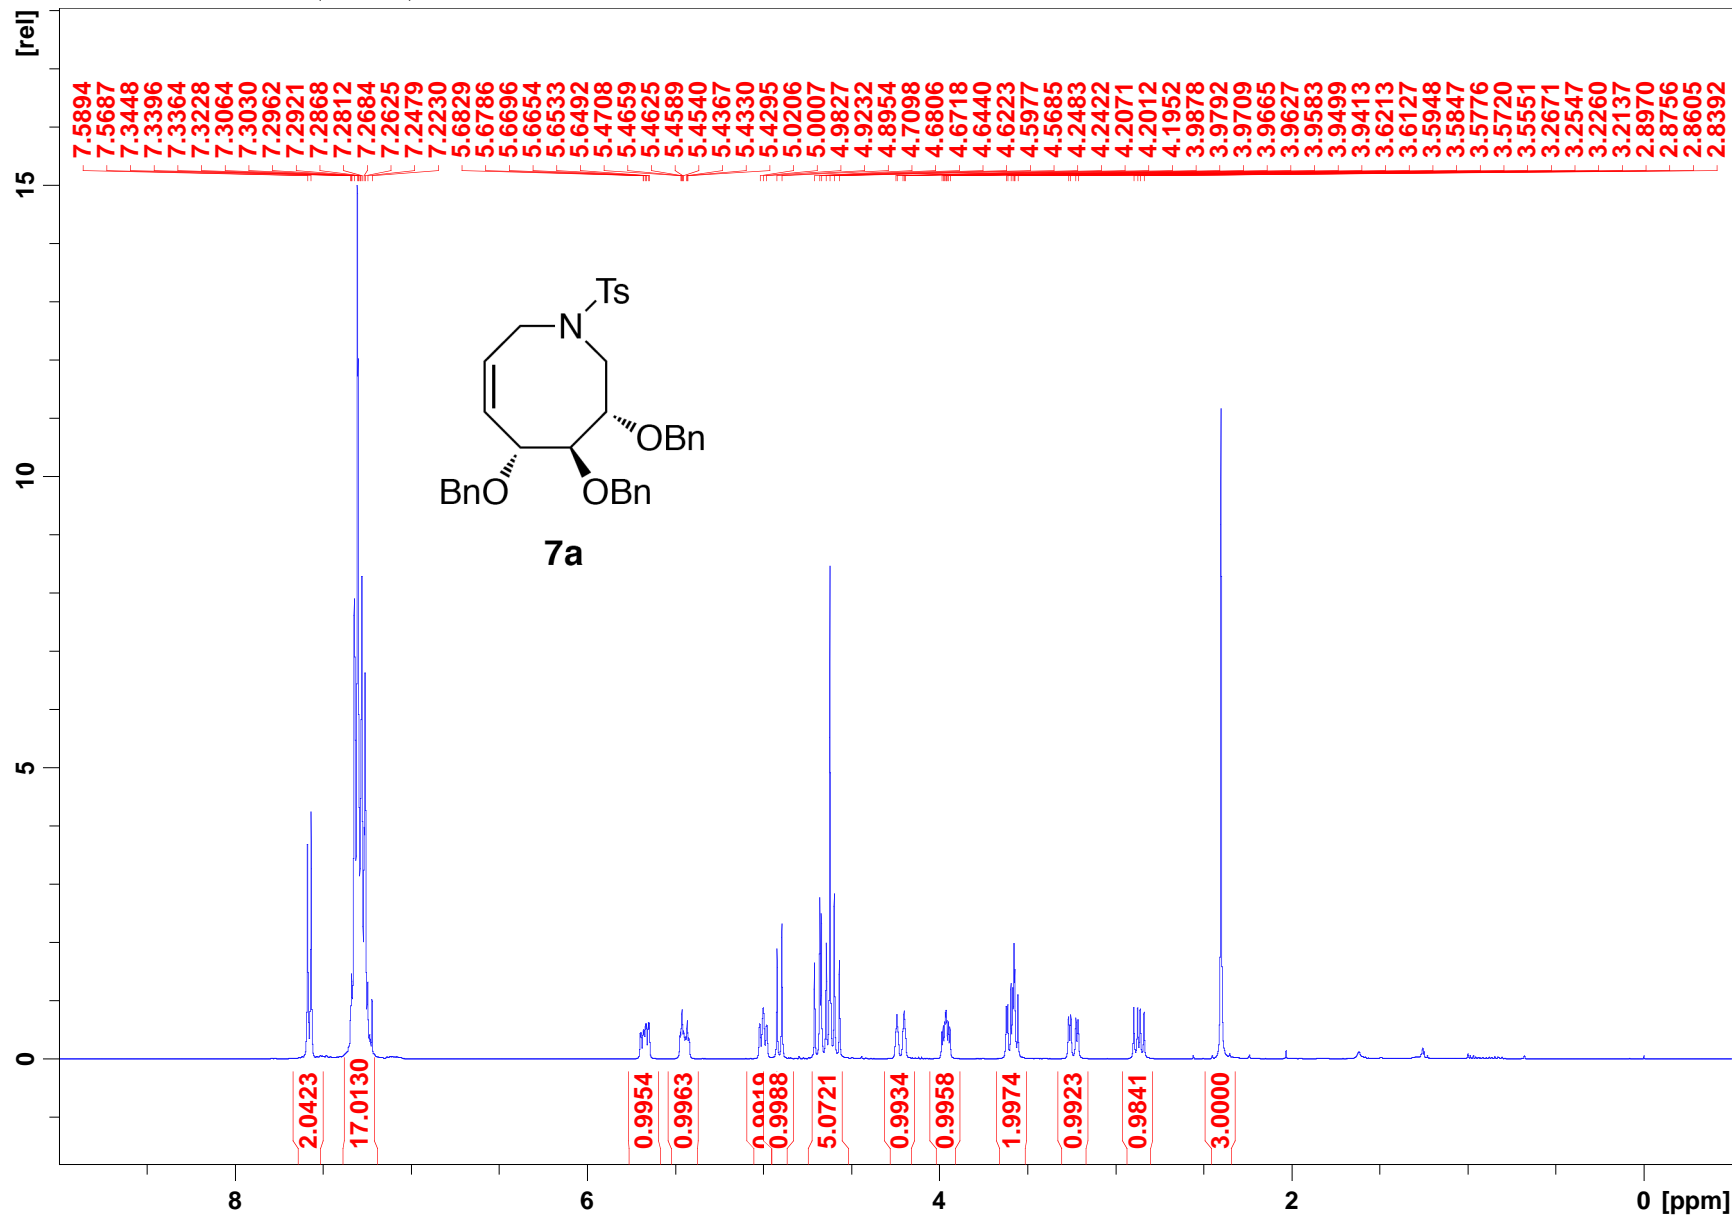



# 13C-NMR

JL-062207 9 1 C:\Bruker\TOPSPIN leex3451

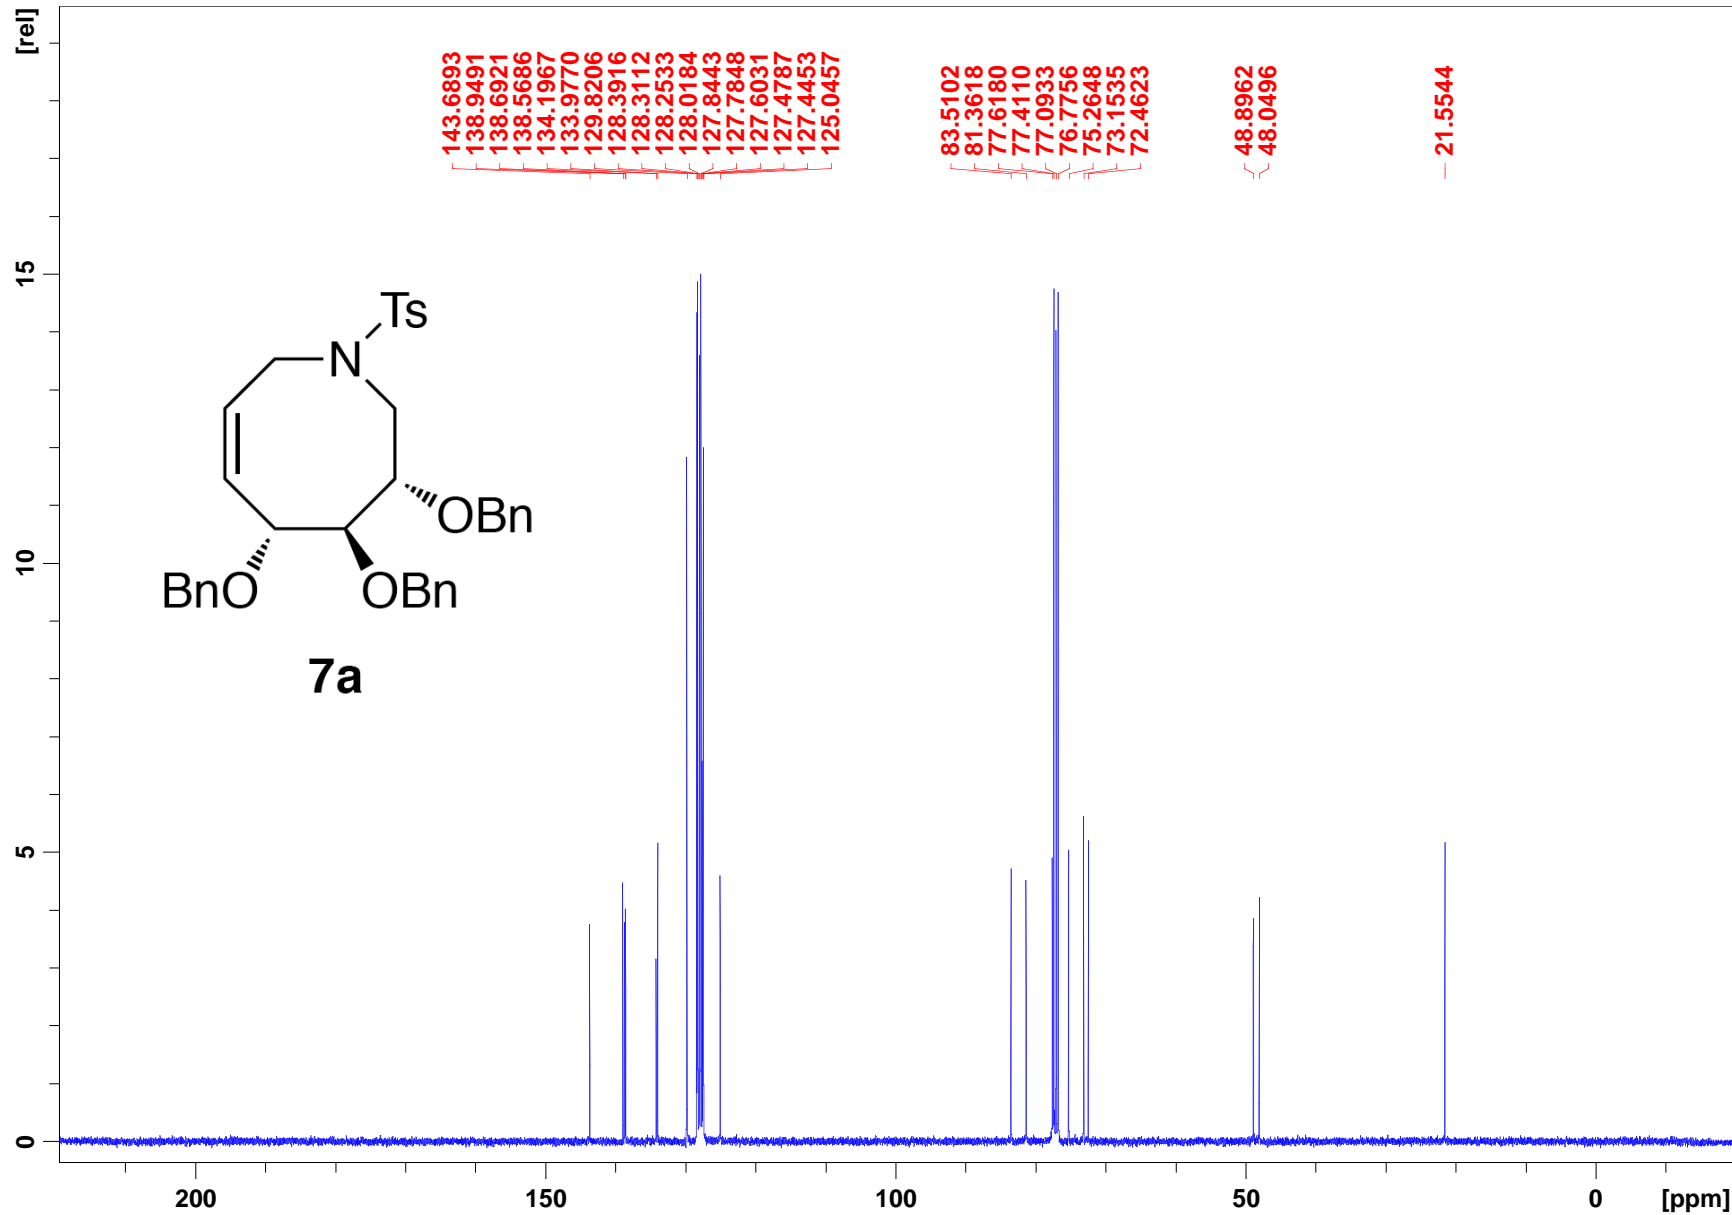

# 1H-NMR

JL-042707 1 1 C:\Bruker\TOPSPIN leex3451

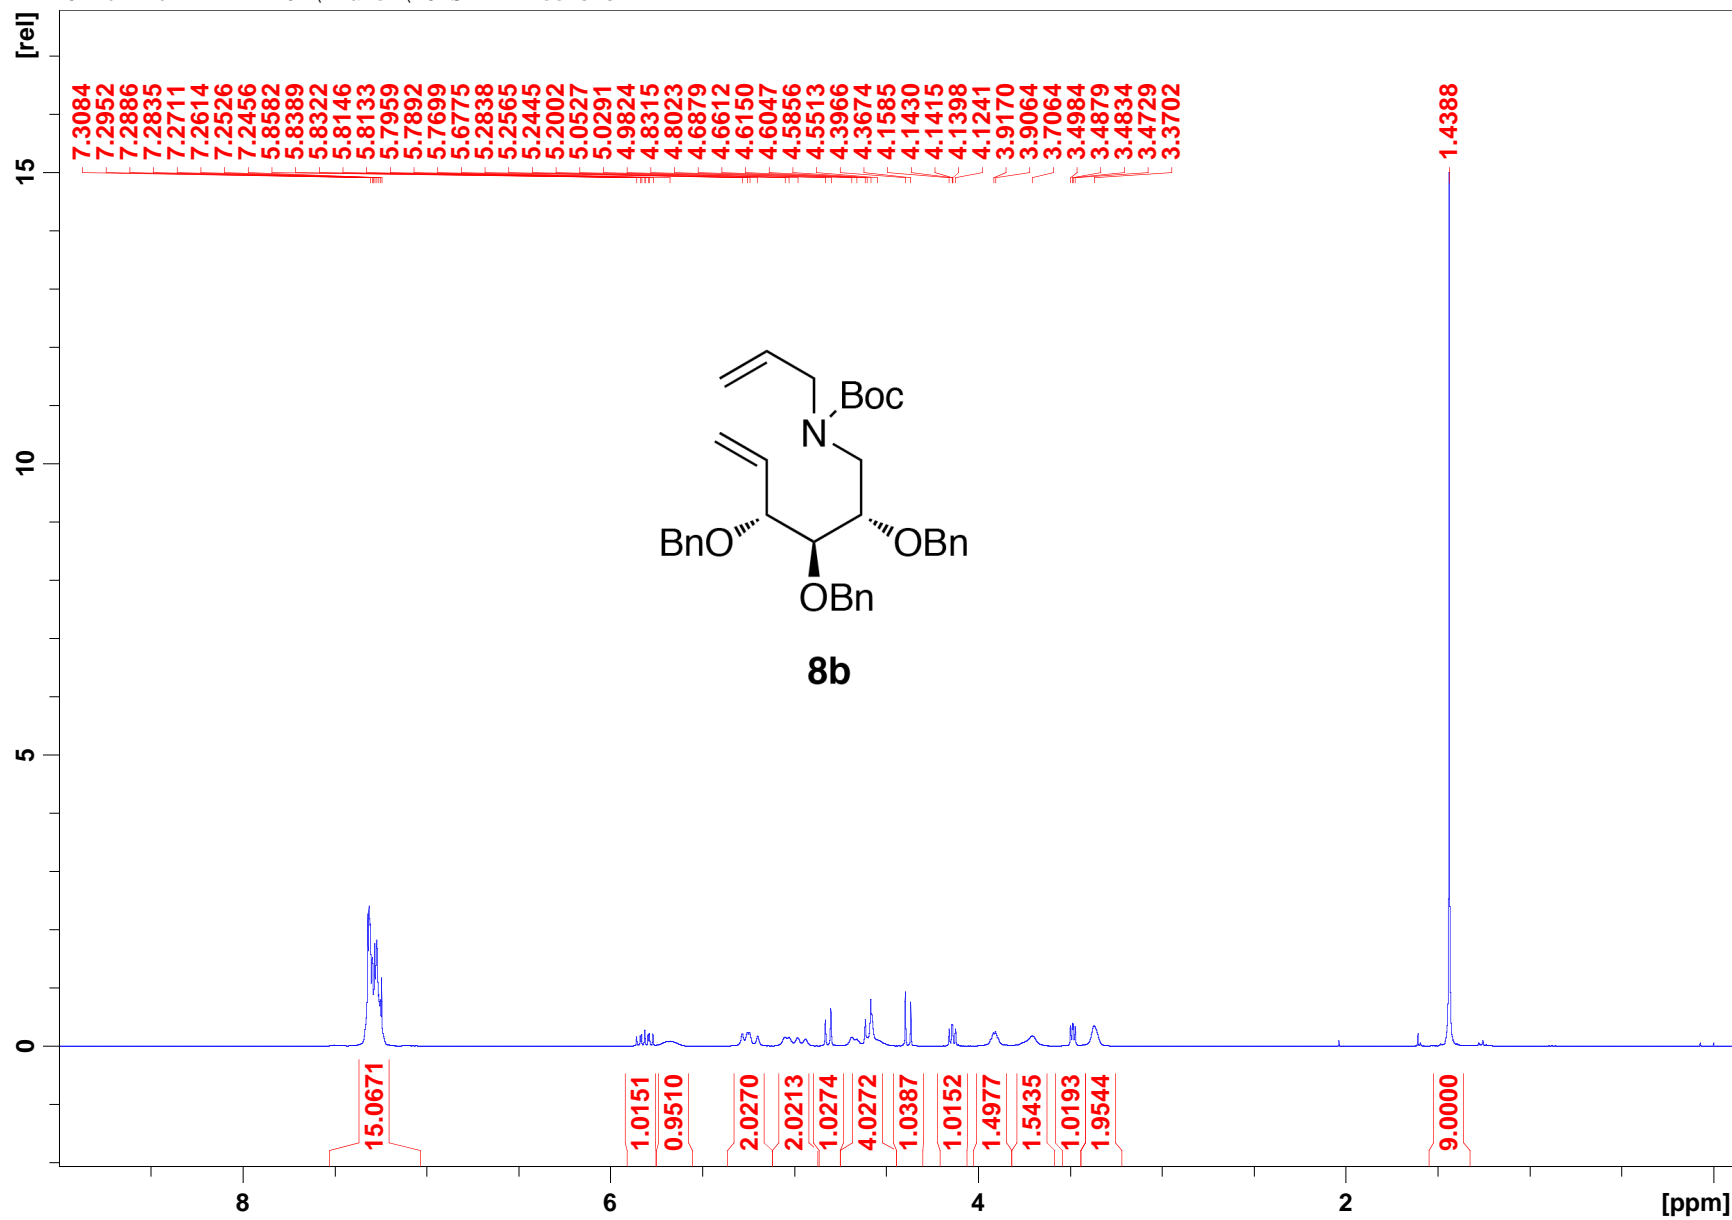

# 13C-NMR

JL-042707 4 1 C:\Bruker\TOPSPIN leex3451

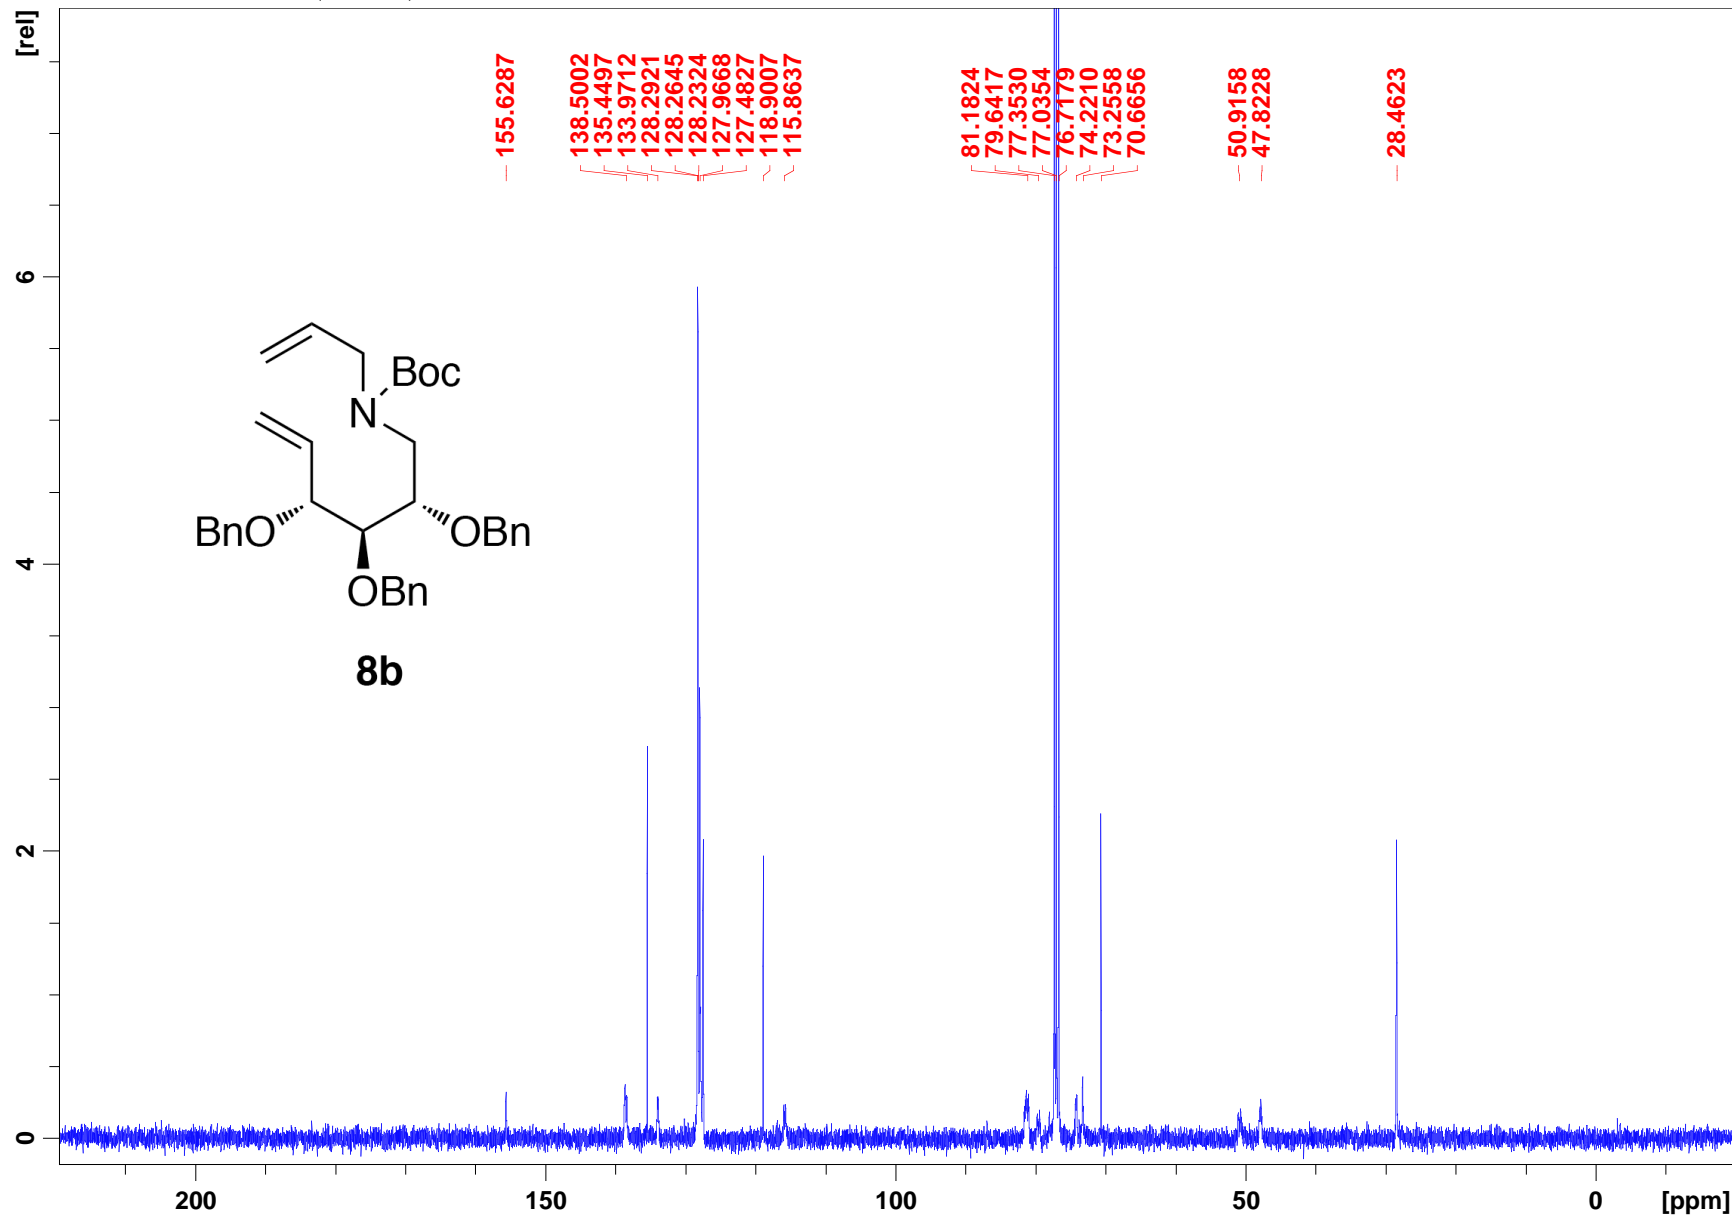

# 1H-NMR

JL-051807-RE 2 1 C:\Bruker\TOPSPIN leex3451

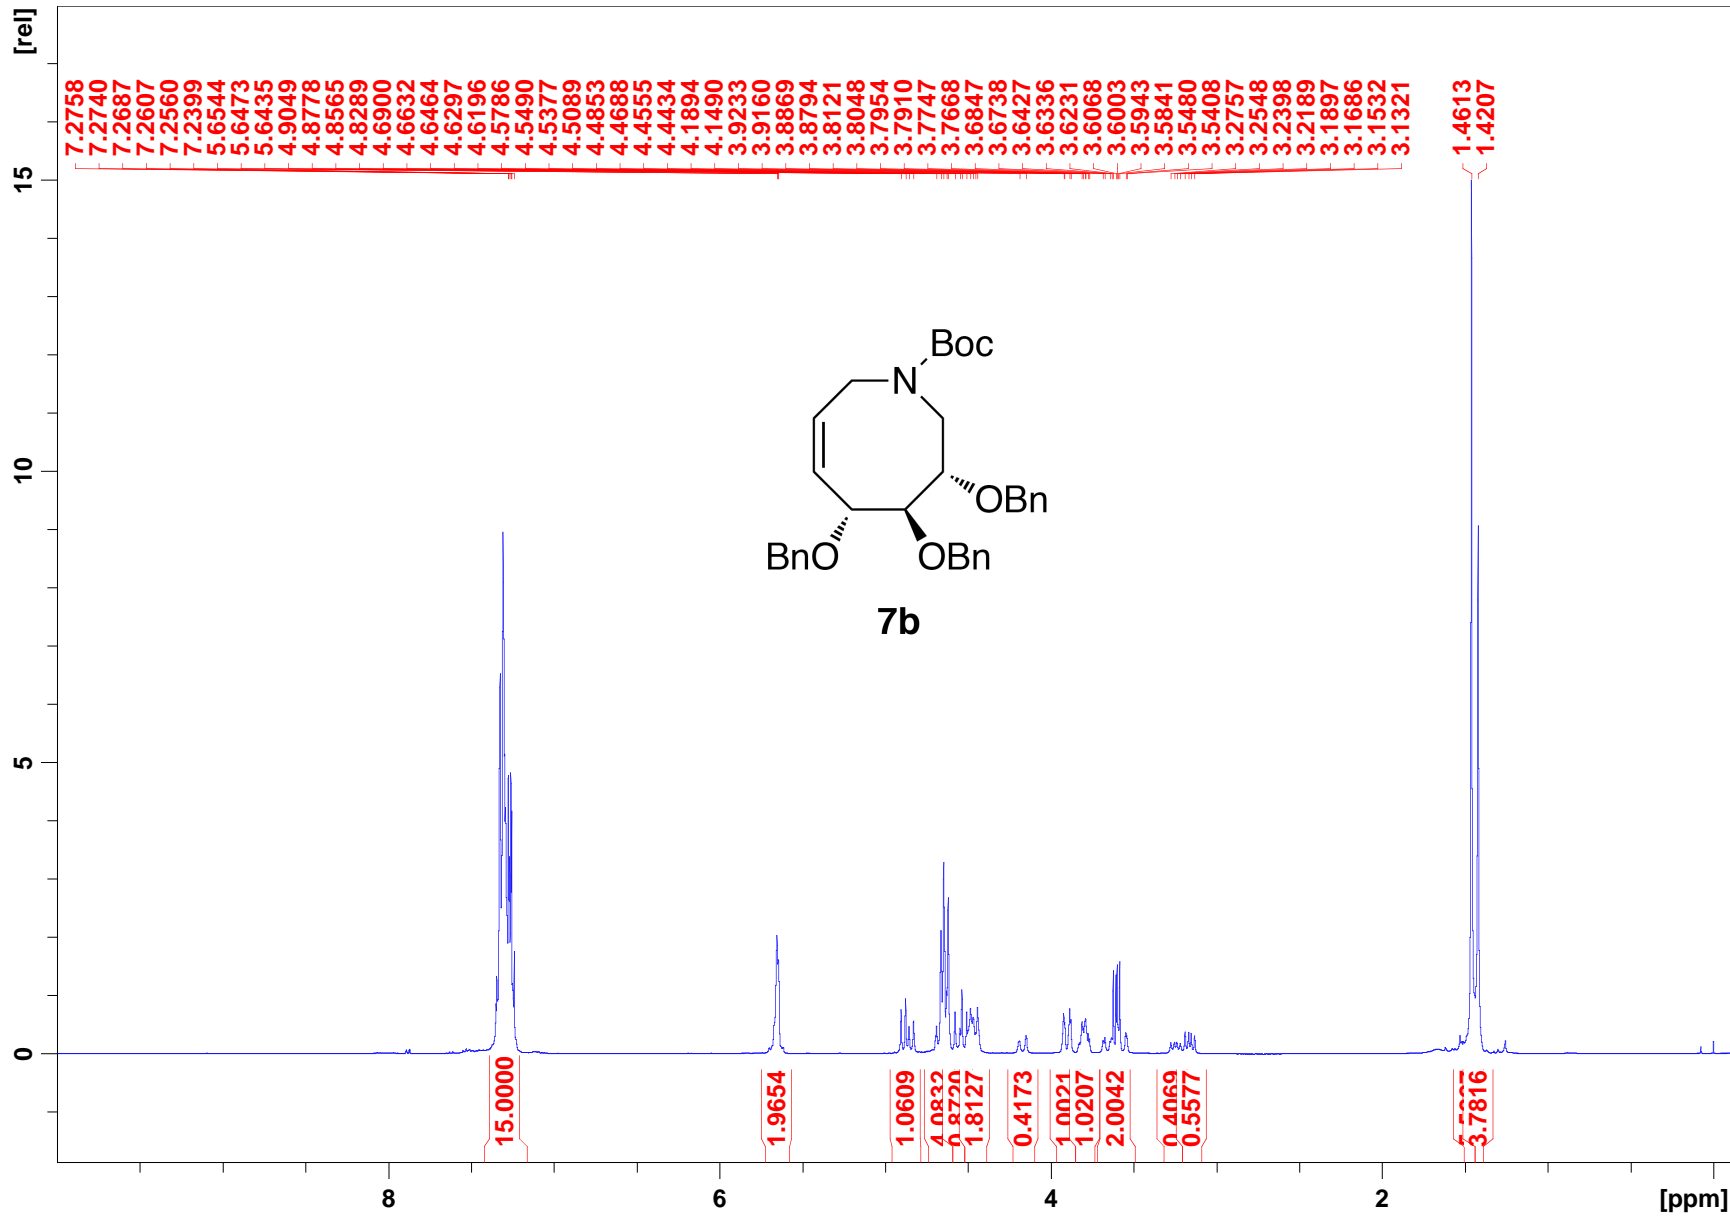

# 13C-NMR

JL-051807-RE 4 1 C:\Bruker\TOPSPIN leex3451

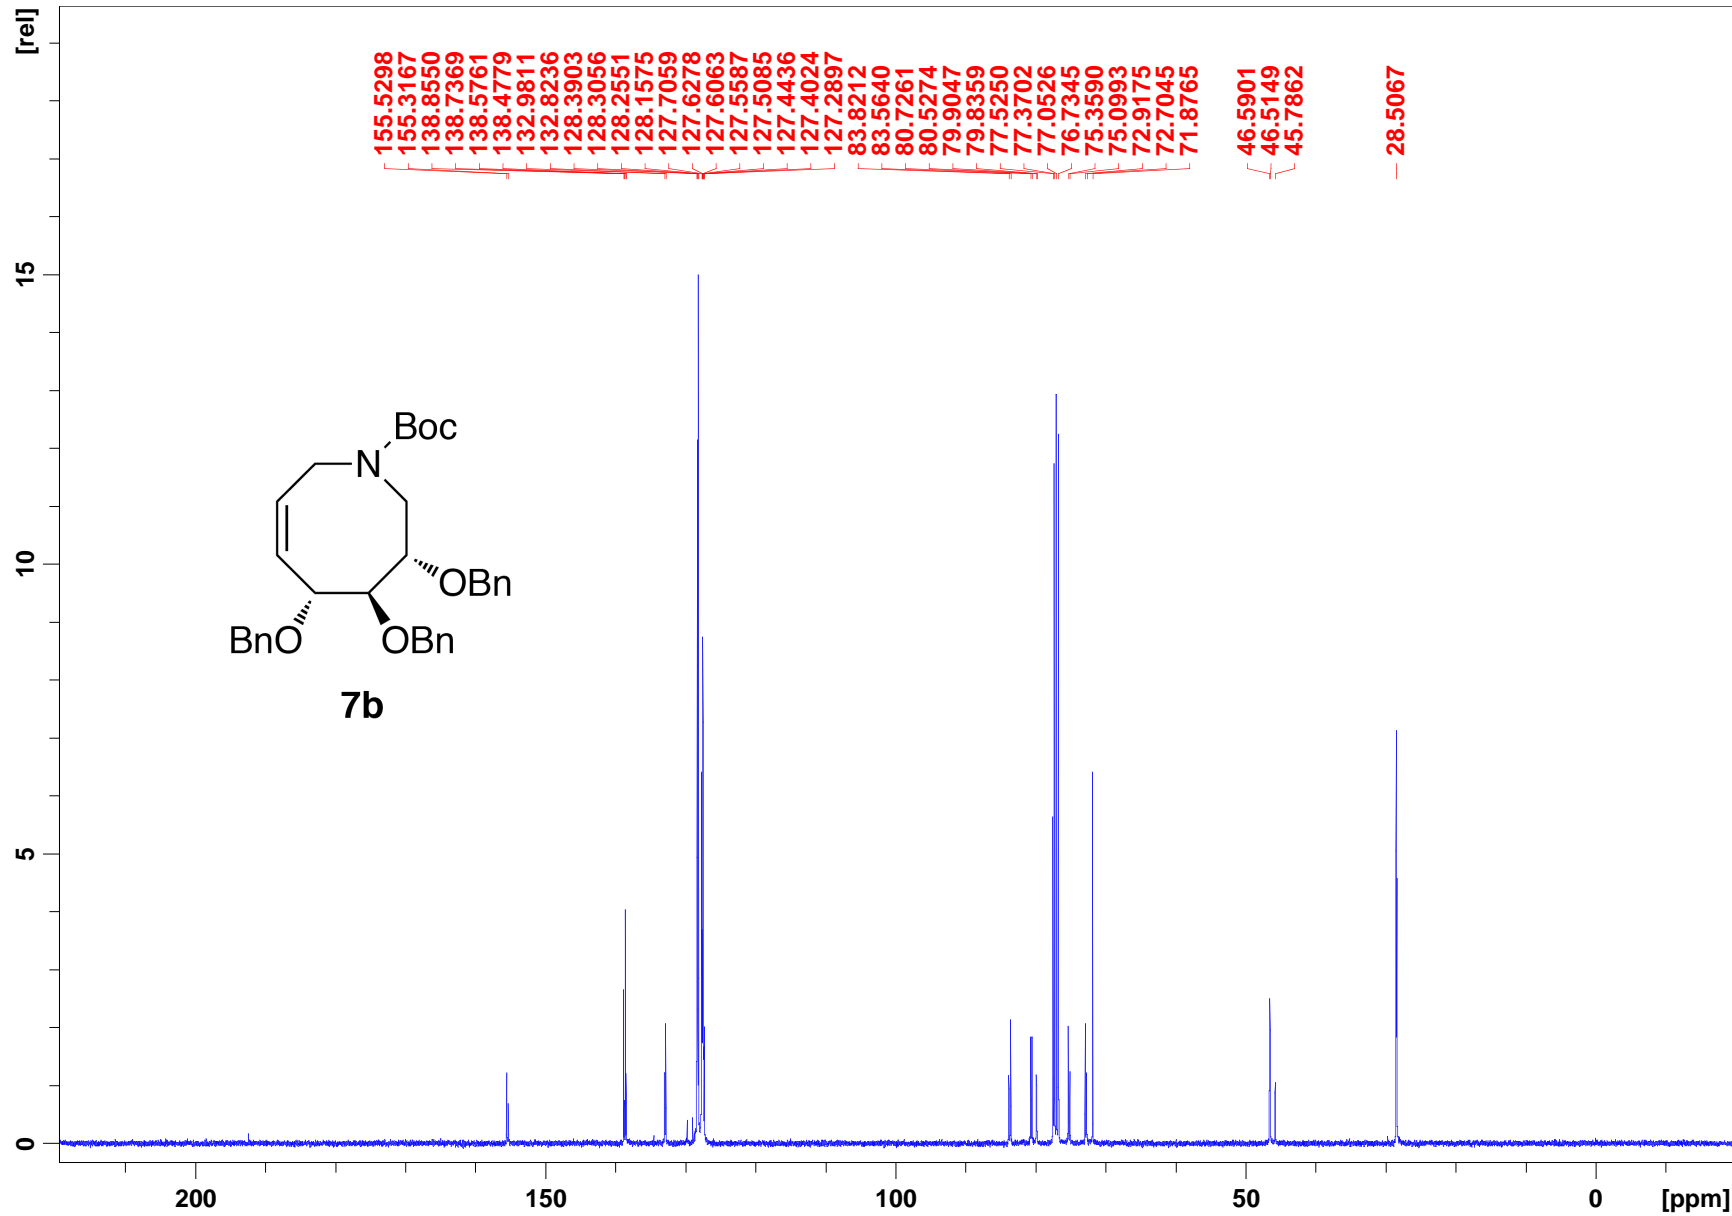

# 1H-NMR

JL070507 20 1 C:\Bruker\TOPSPIN leex3451

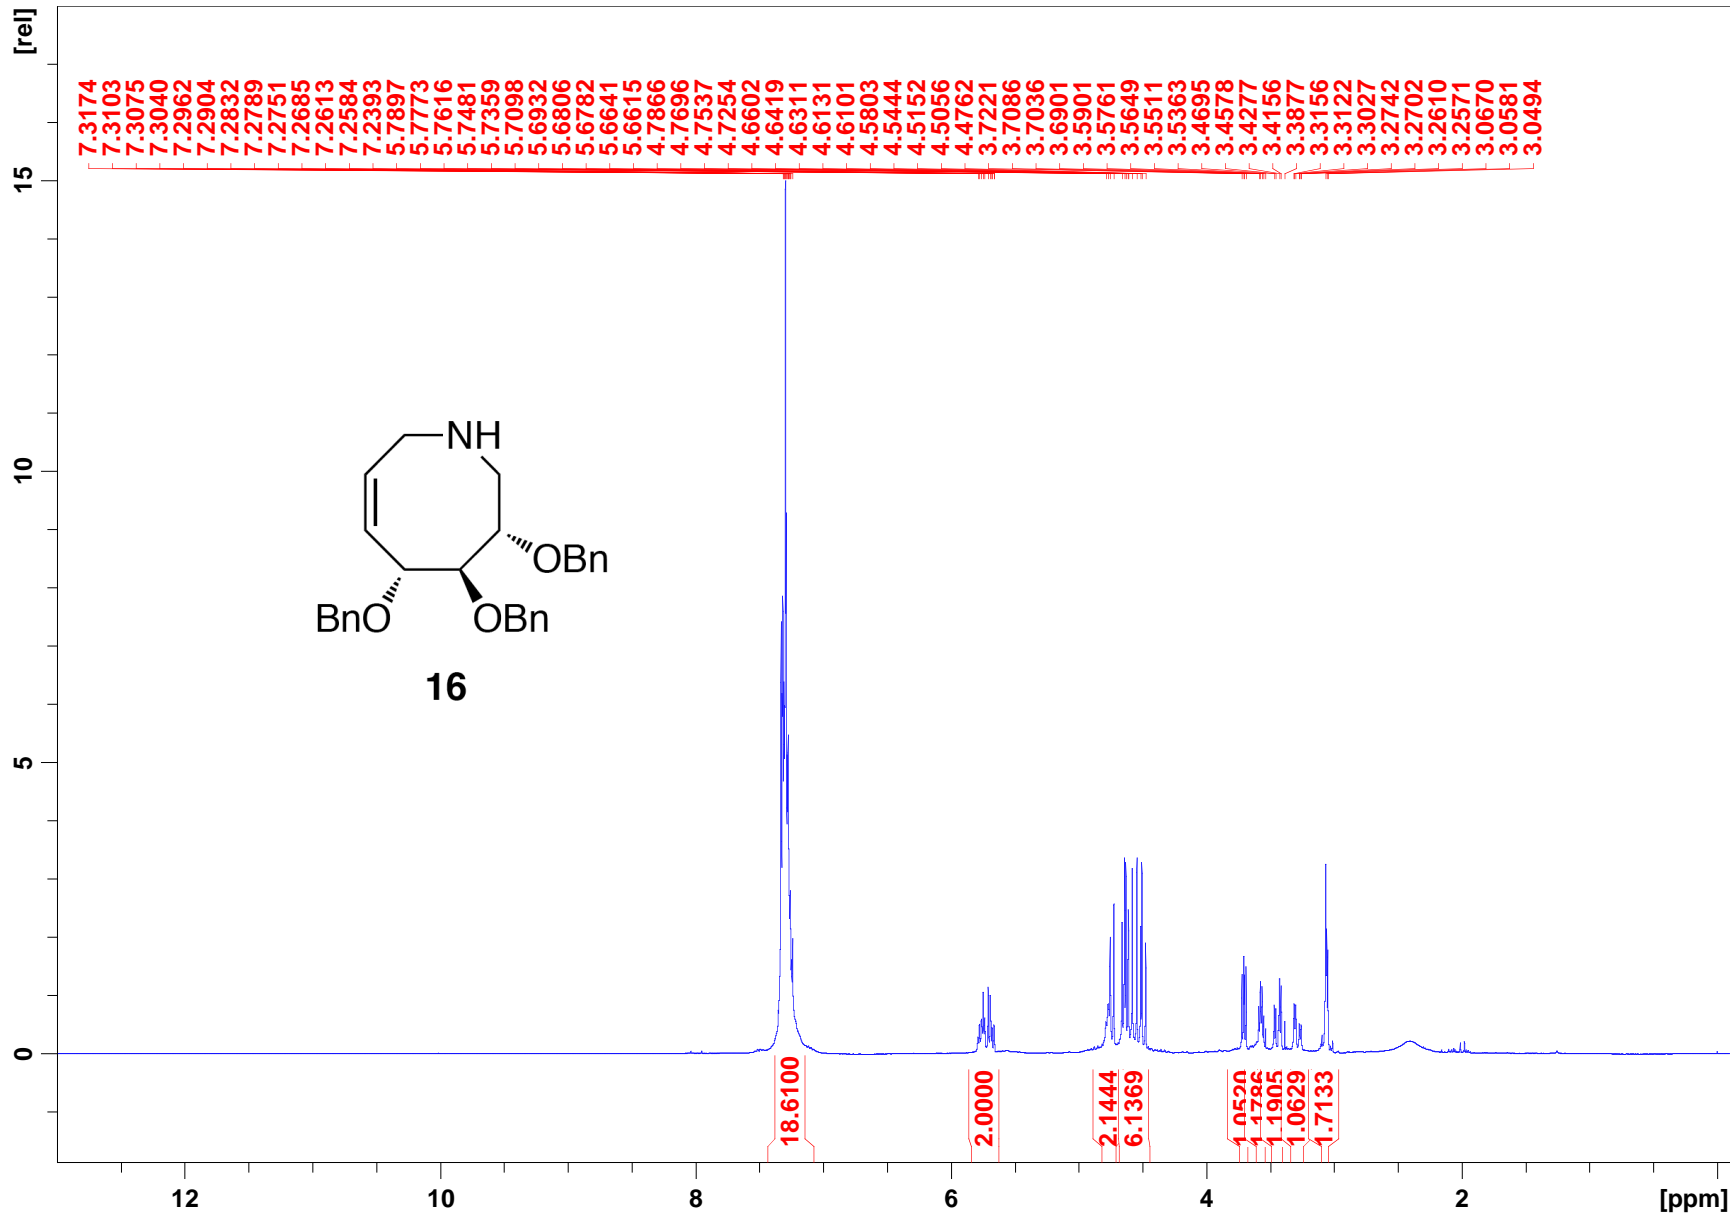

# 13C-NMR

JL070507 11 1 C:\Bruker\TOPSPIN leex3451

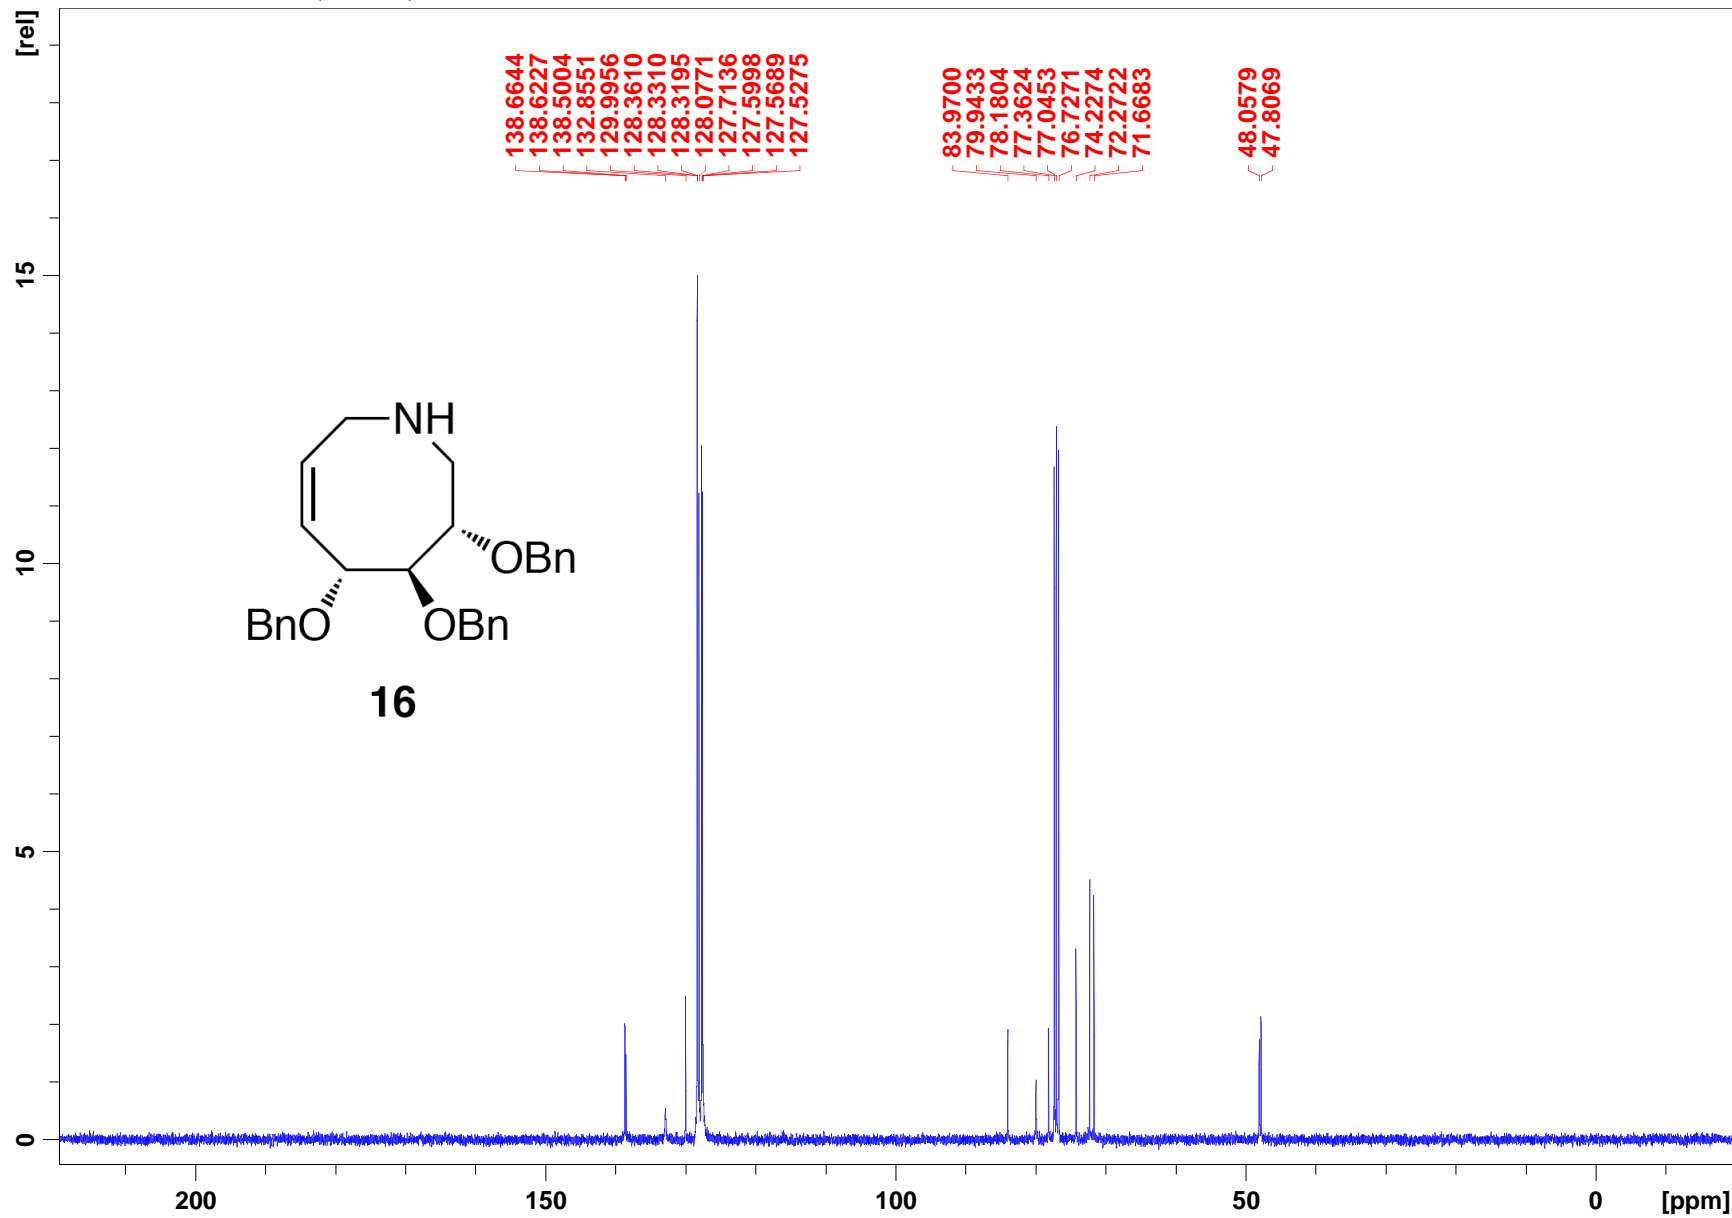

# 1H-NMR

JL-070807 1 1 C:\Bruker\TOPSPIN leex3451

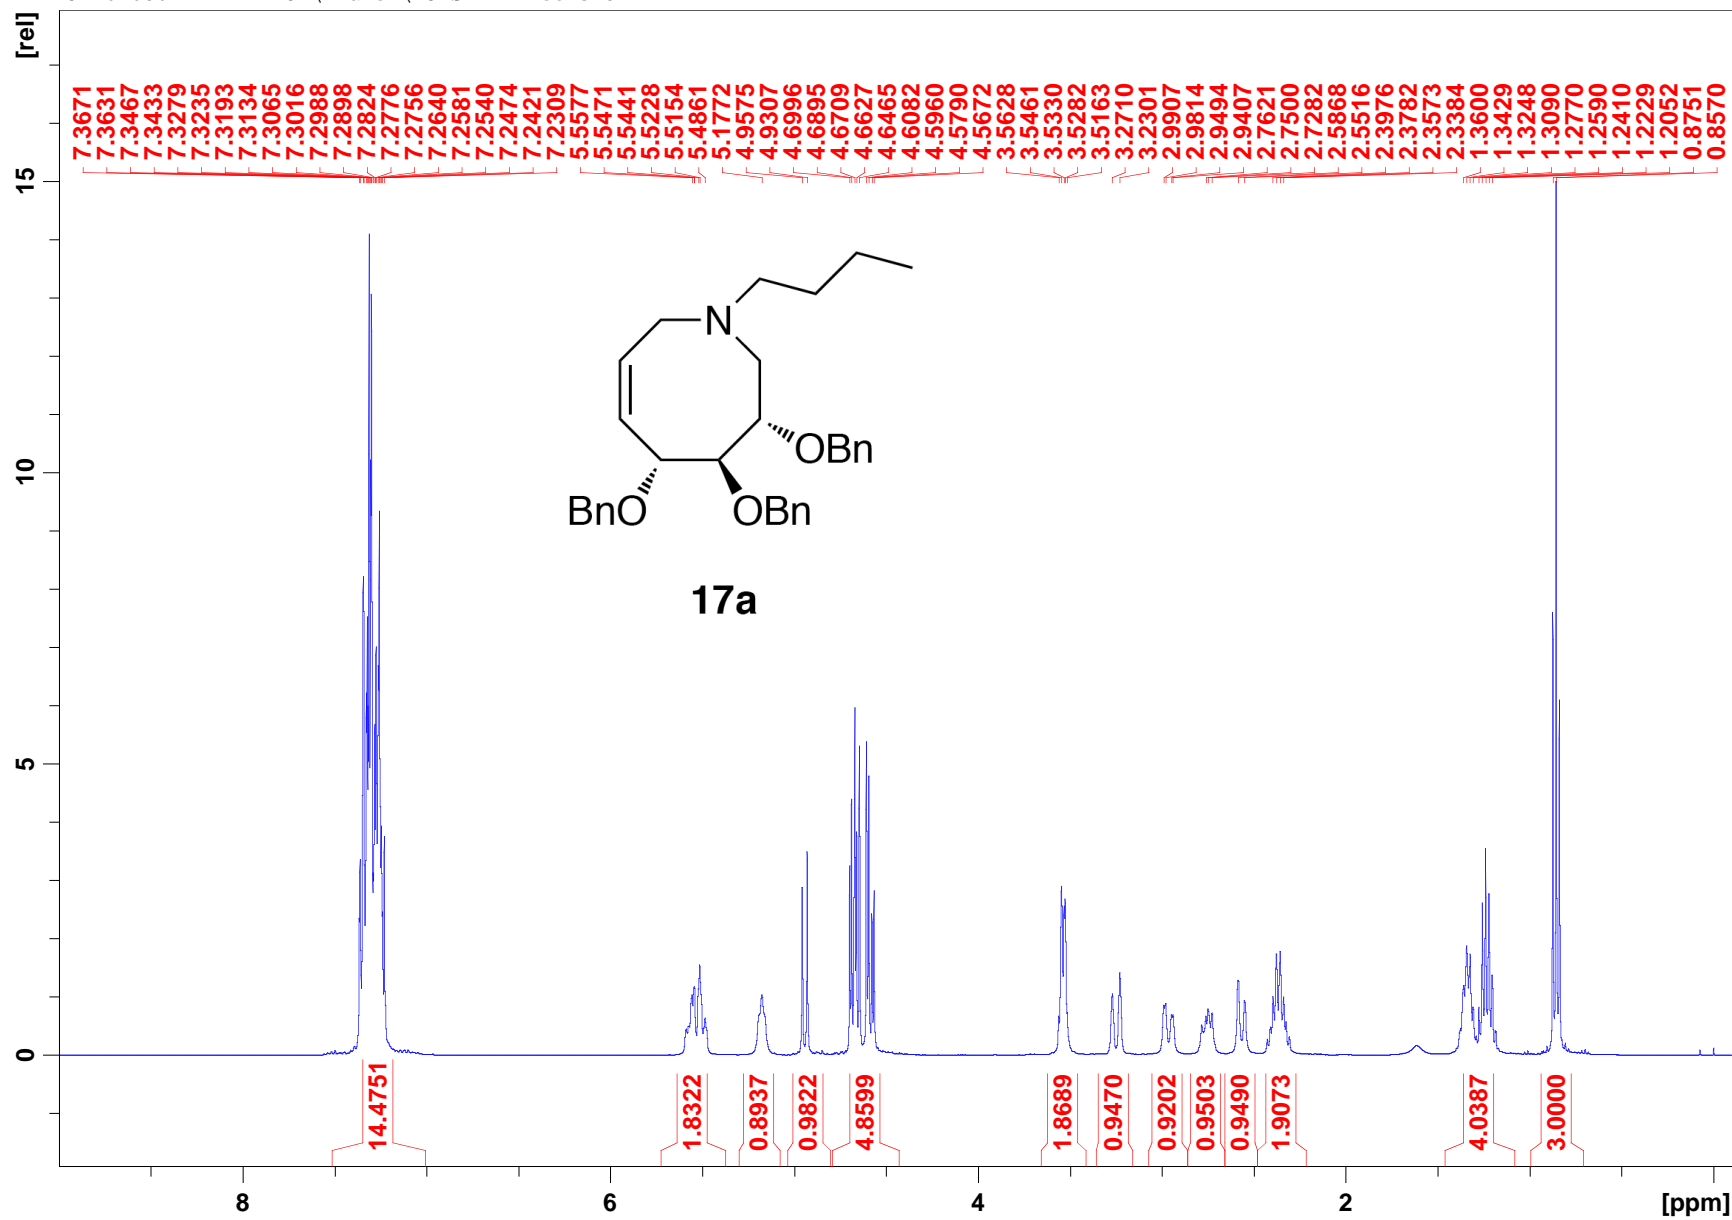



# 13C-NMR

JL-070807 2 1 C:\Bruker\TOPSPIN leex3451

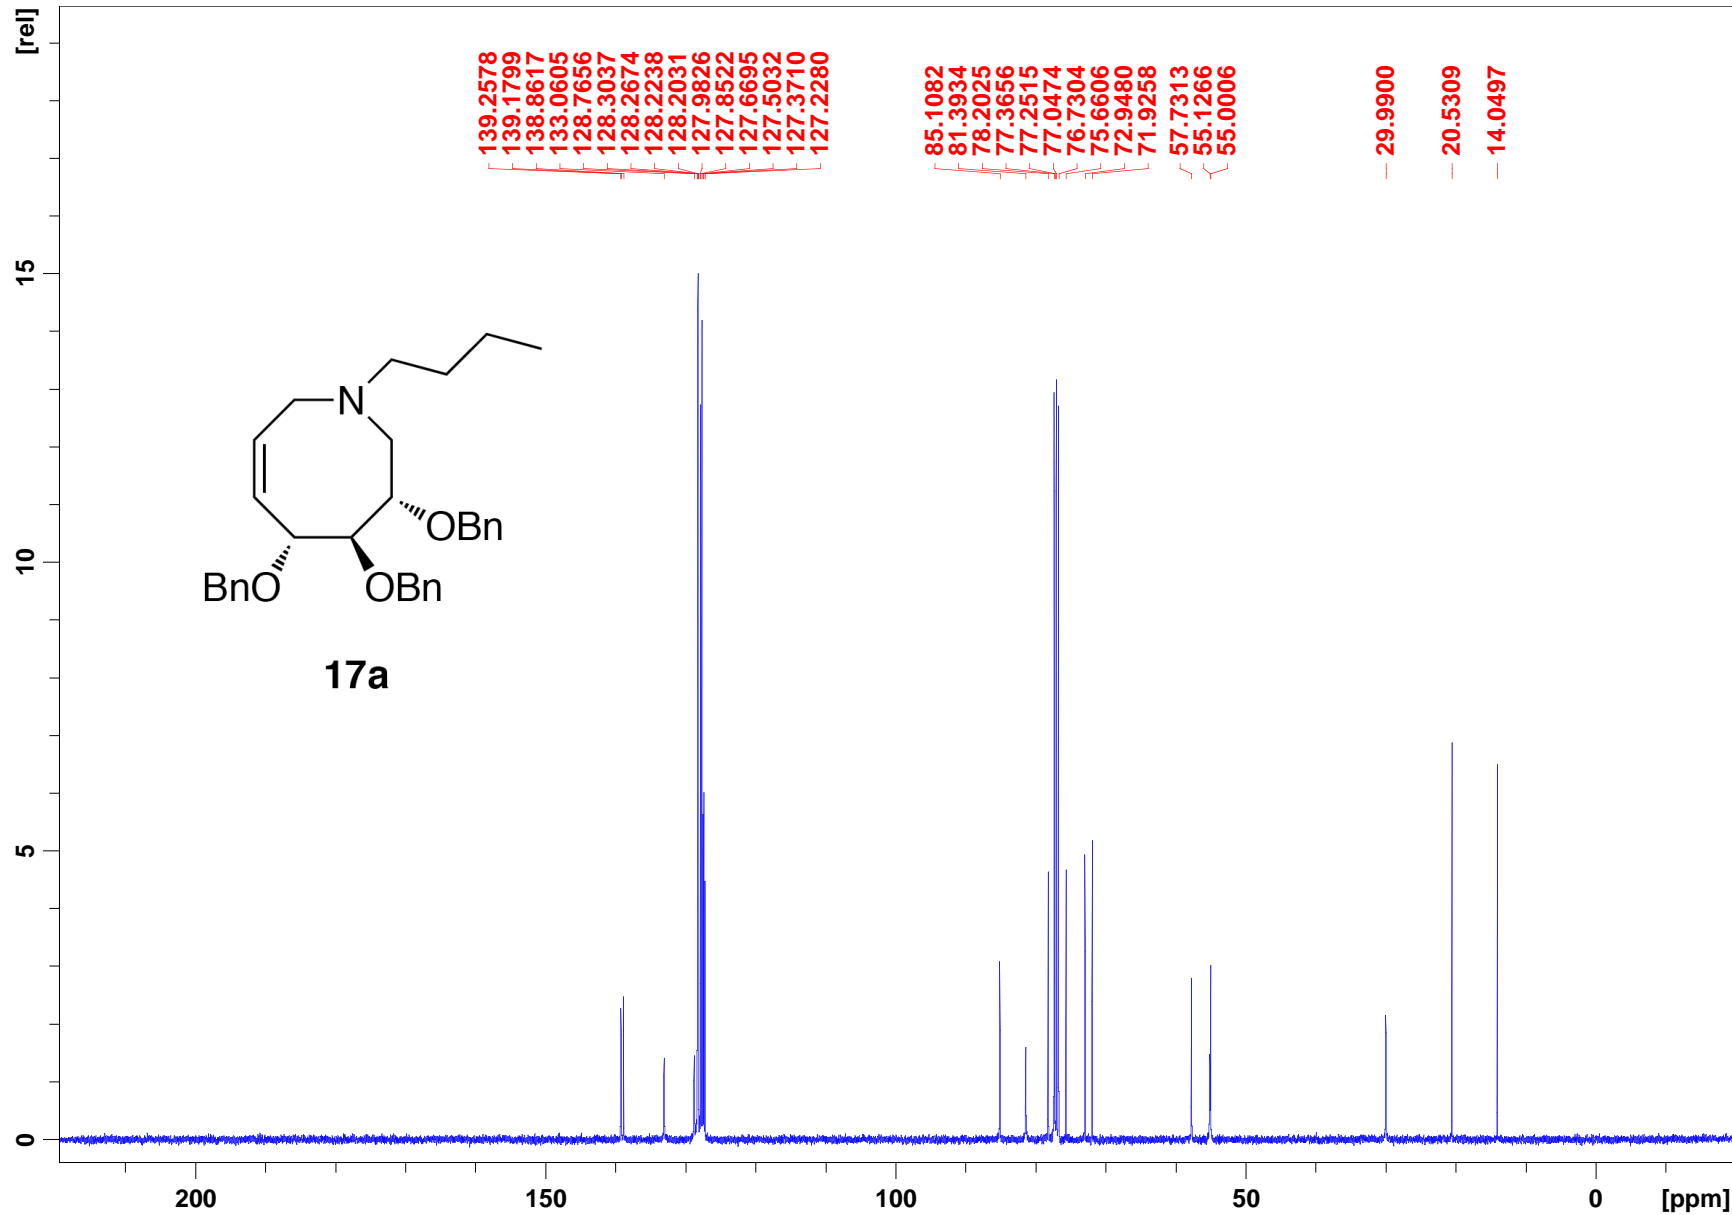

# 1H-NMR

JL-071307 1 1 C:\Bruker\TOPSPIN leex3451

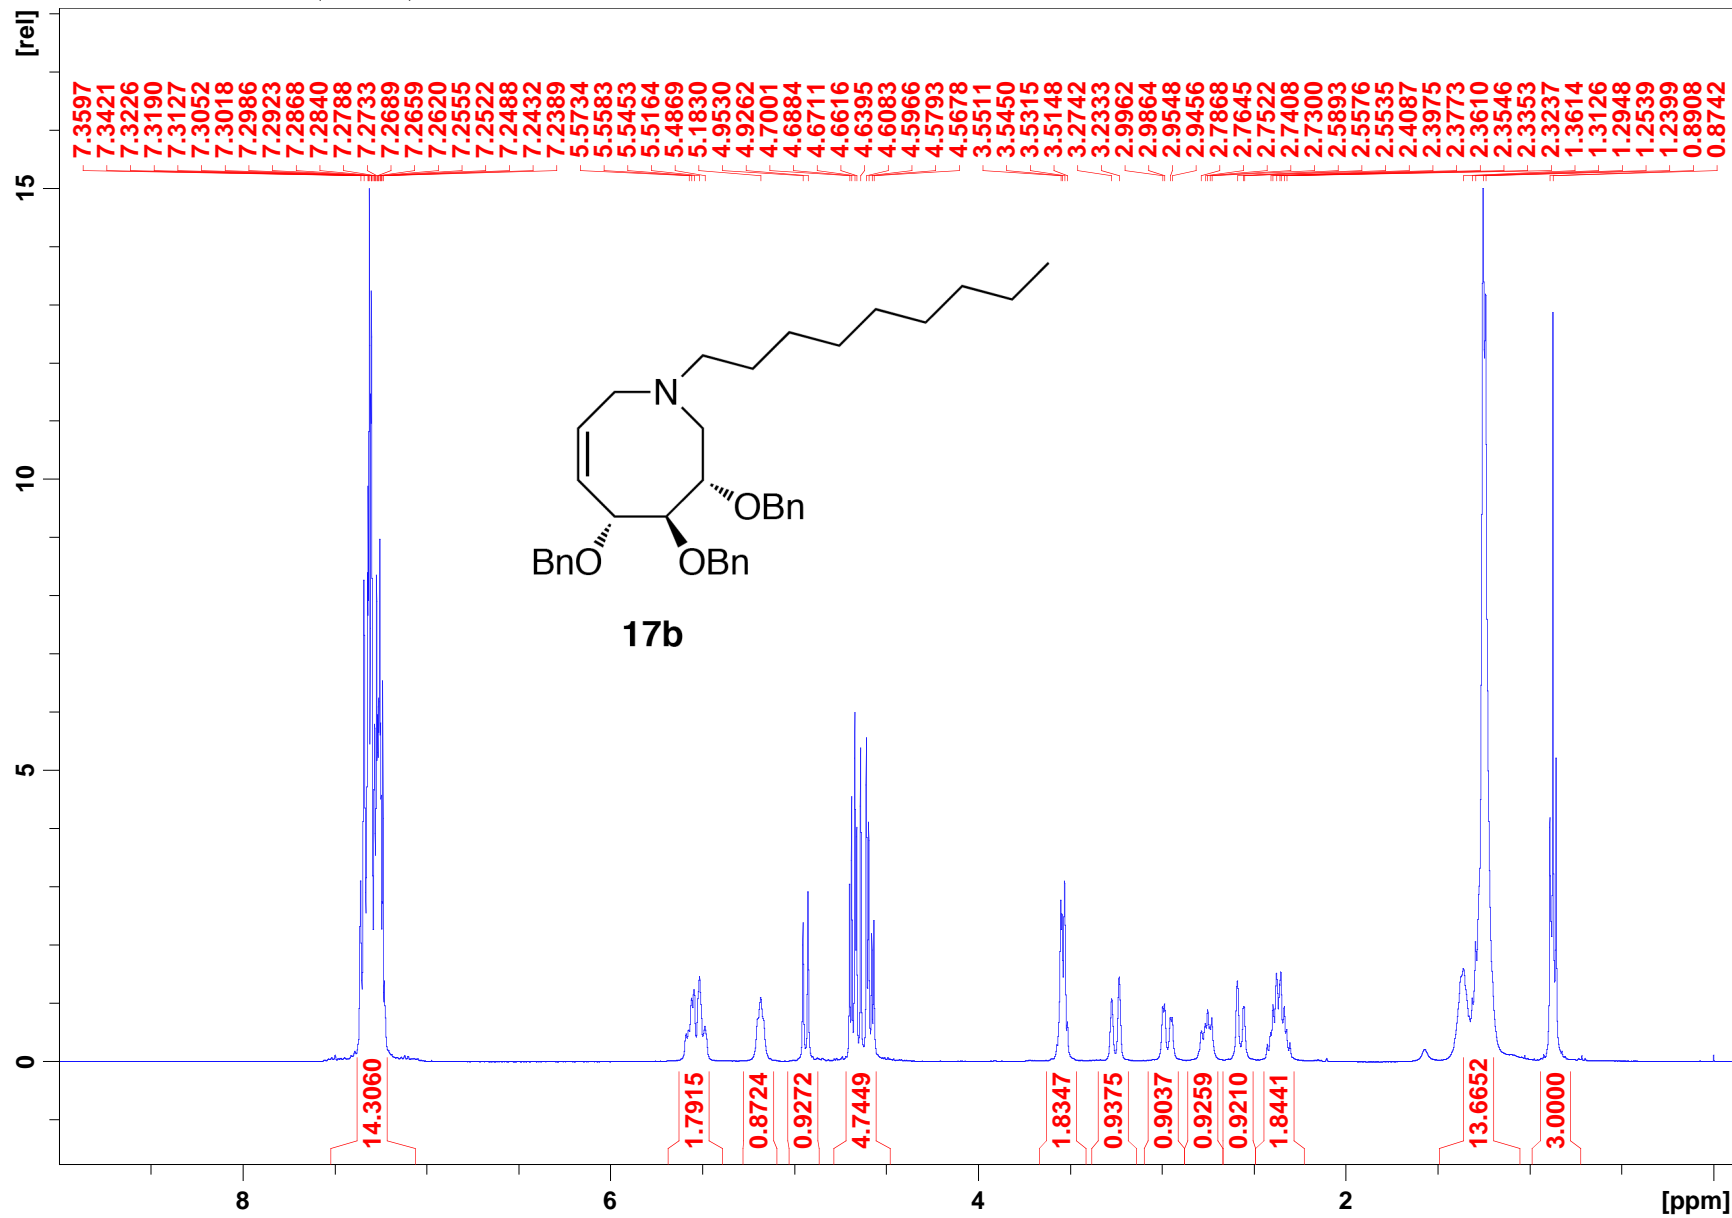

# 13C-NMR

JL-071307 10 1 C:\Bruker\TOPSPIN leex3451

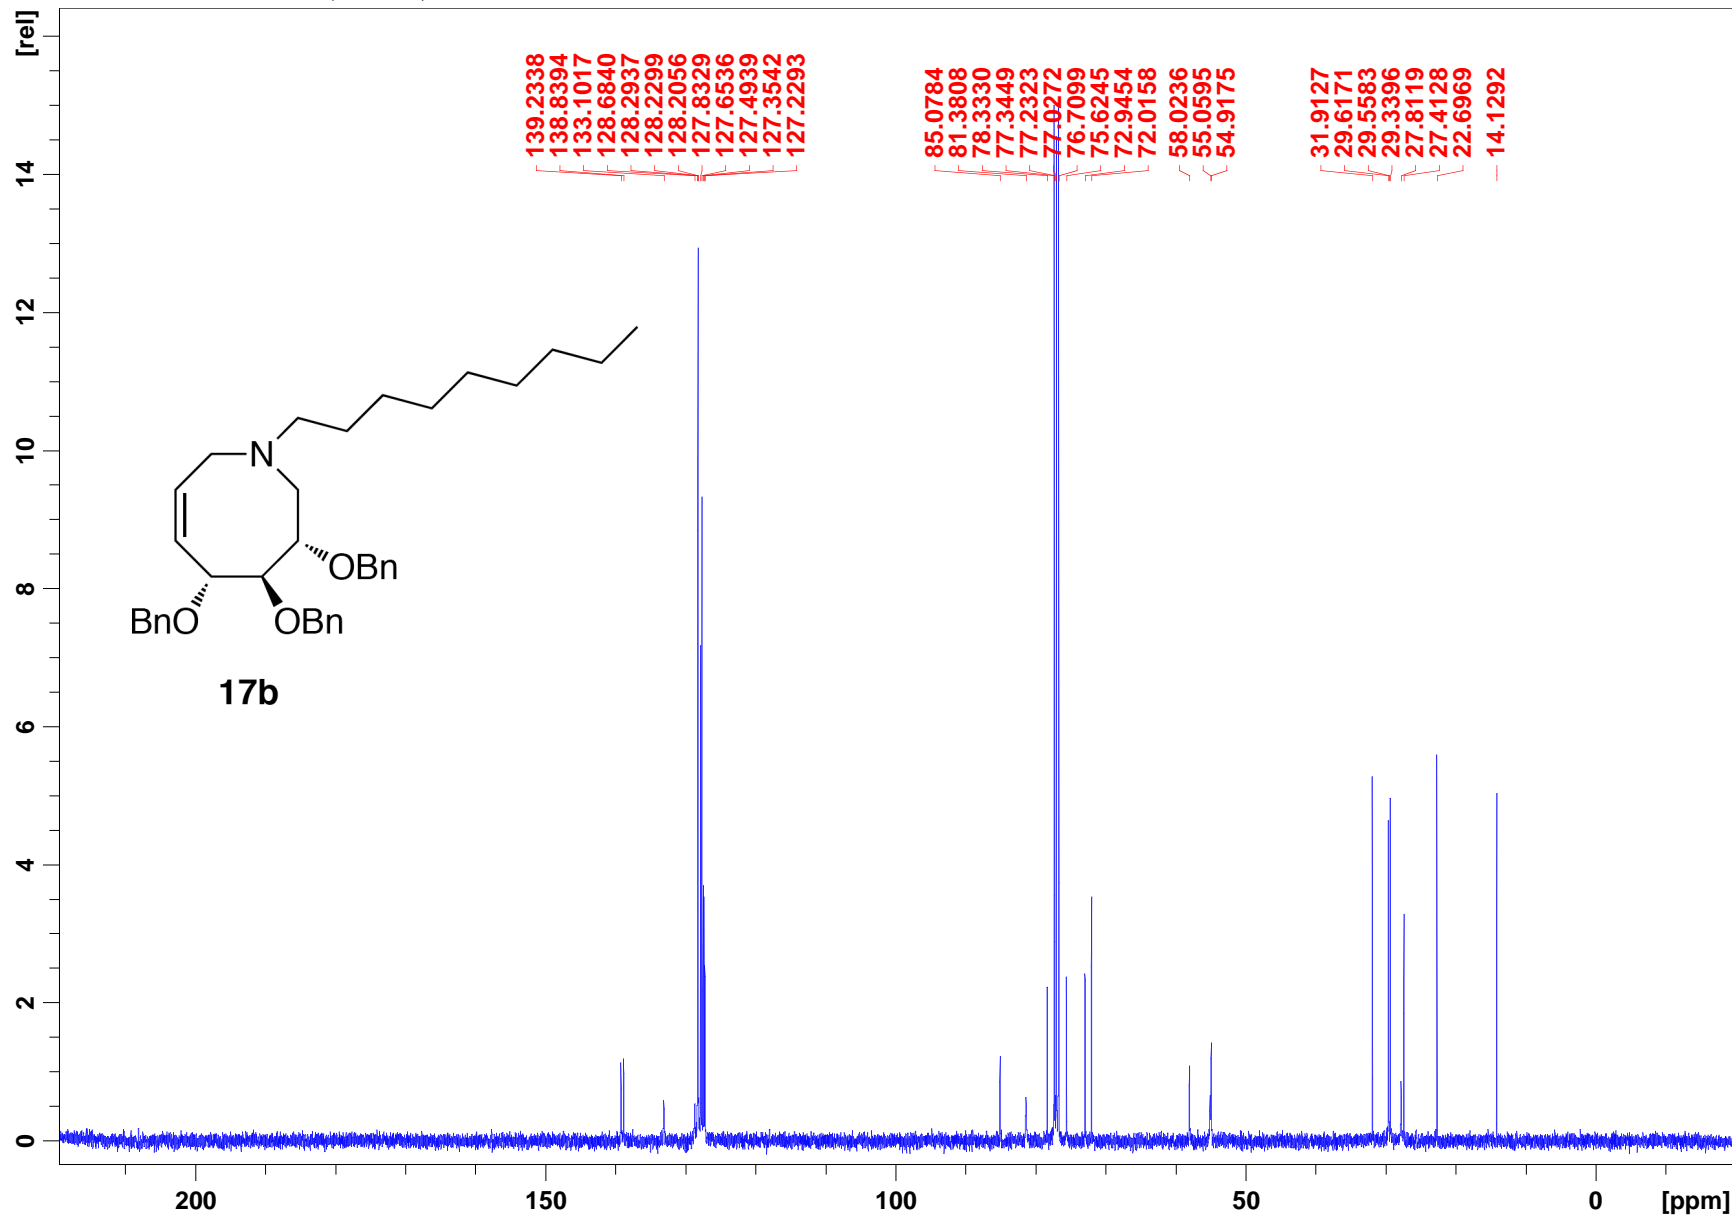

# 1H-NMR

JL-030608 1 1 C:\Bruker\TOPSPIN leex3451

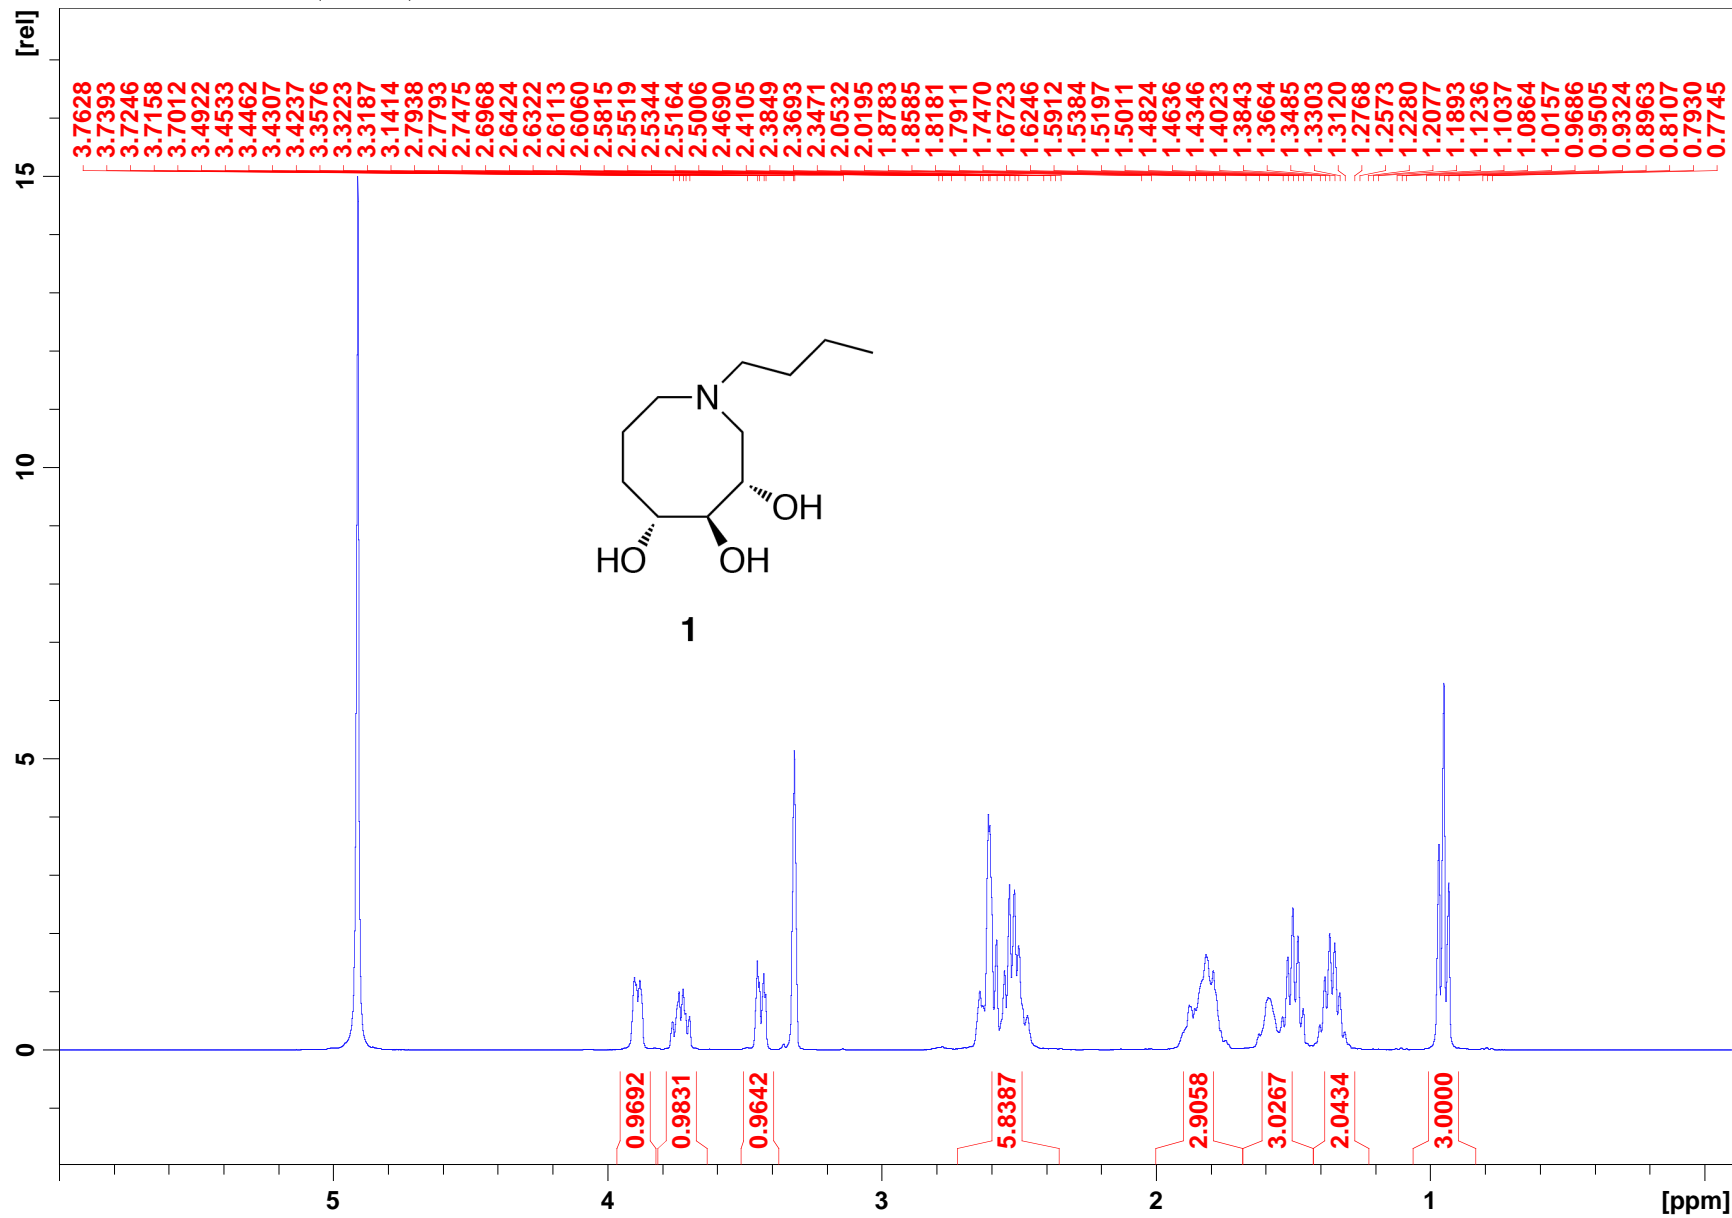

# 13C-NMR

JL-030608 3 1 C:\Bruker\TOPSPIN leex3451

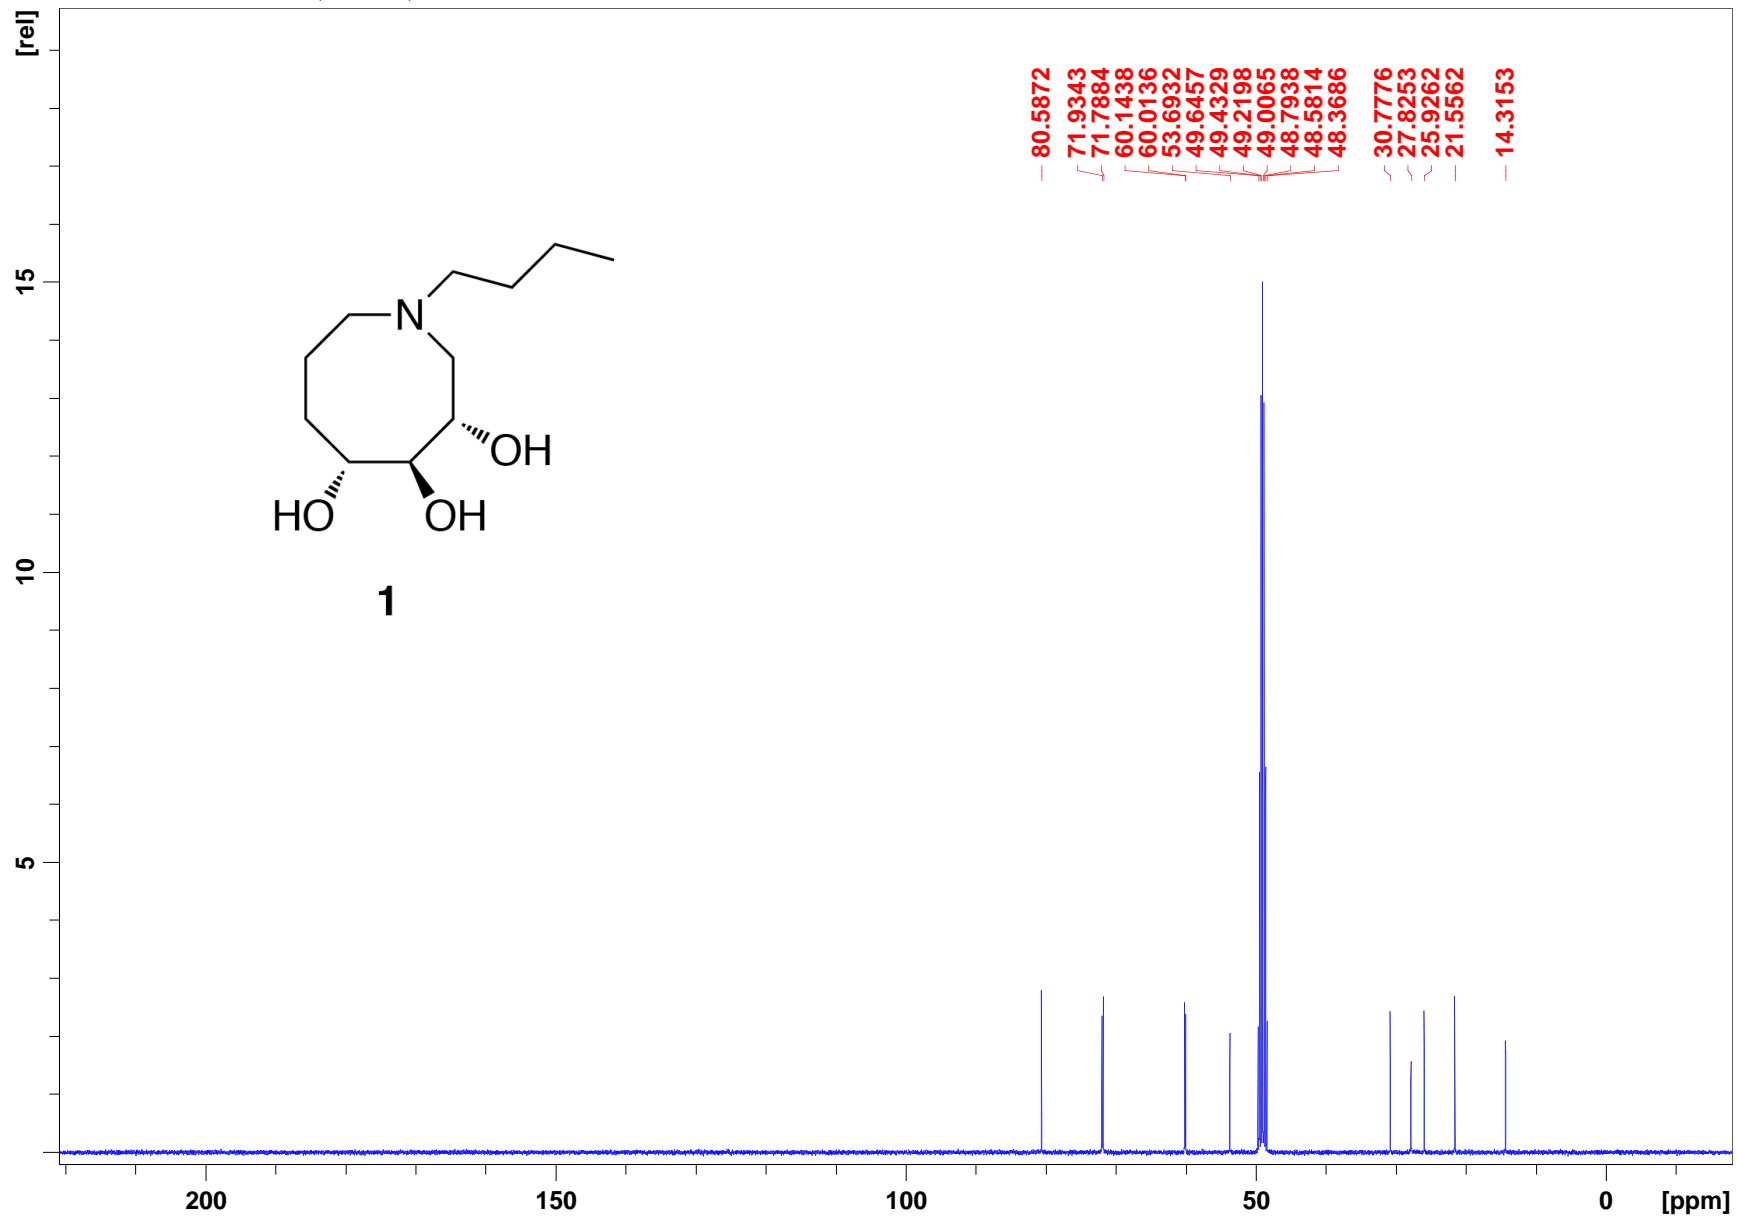

# 1H-NMR

JL-030708 1 1 C:\Bruker\TOPSPIN leex3451

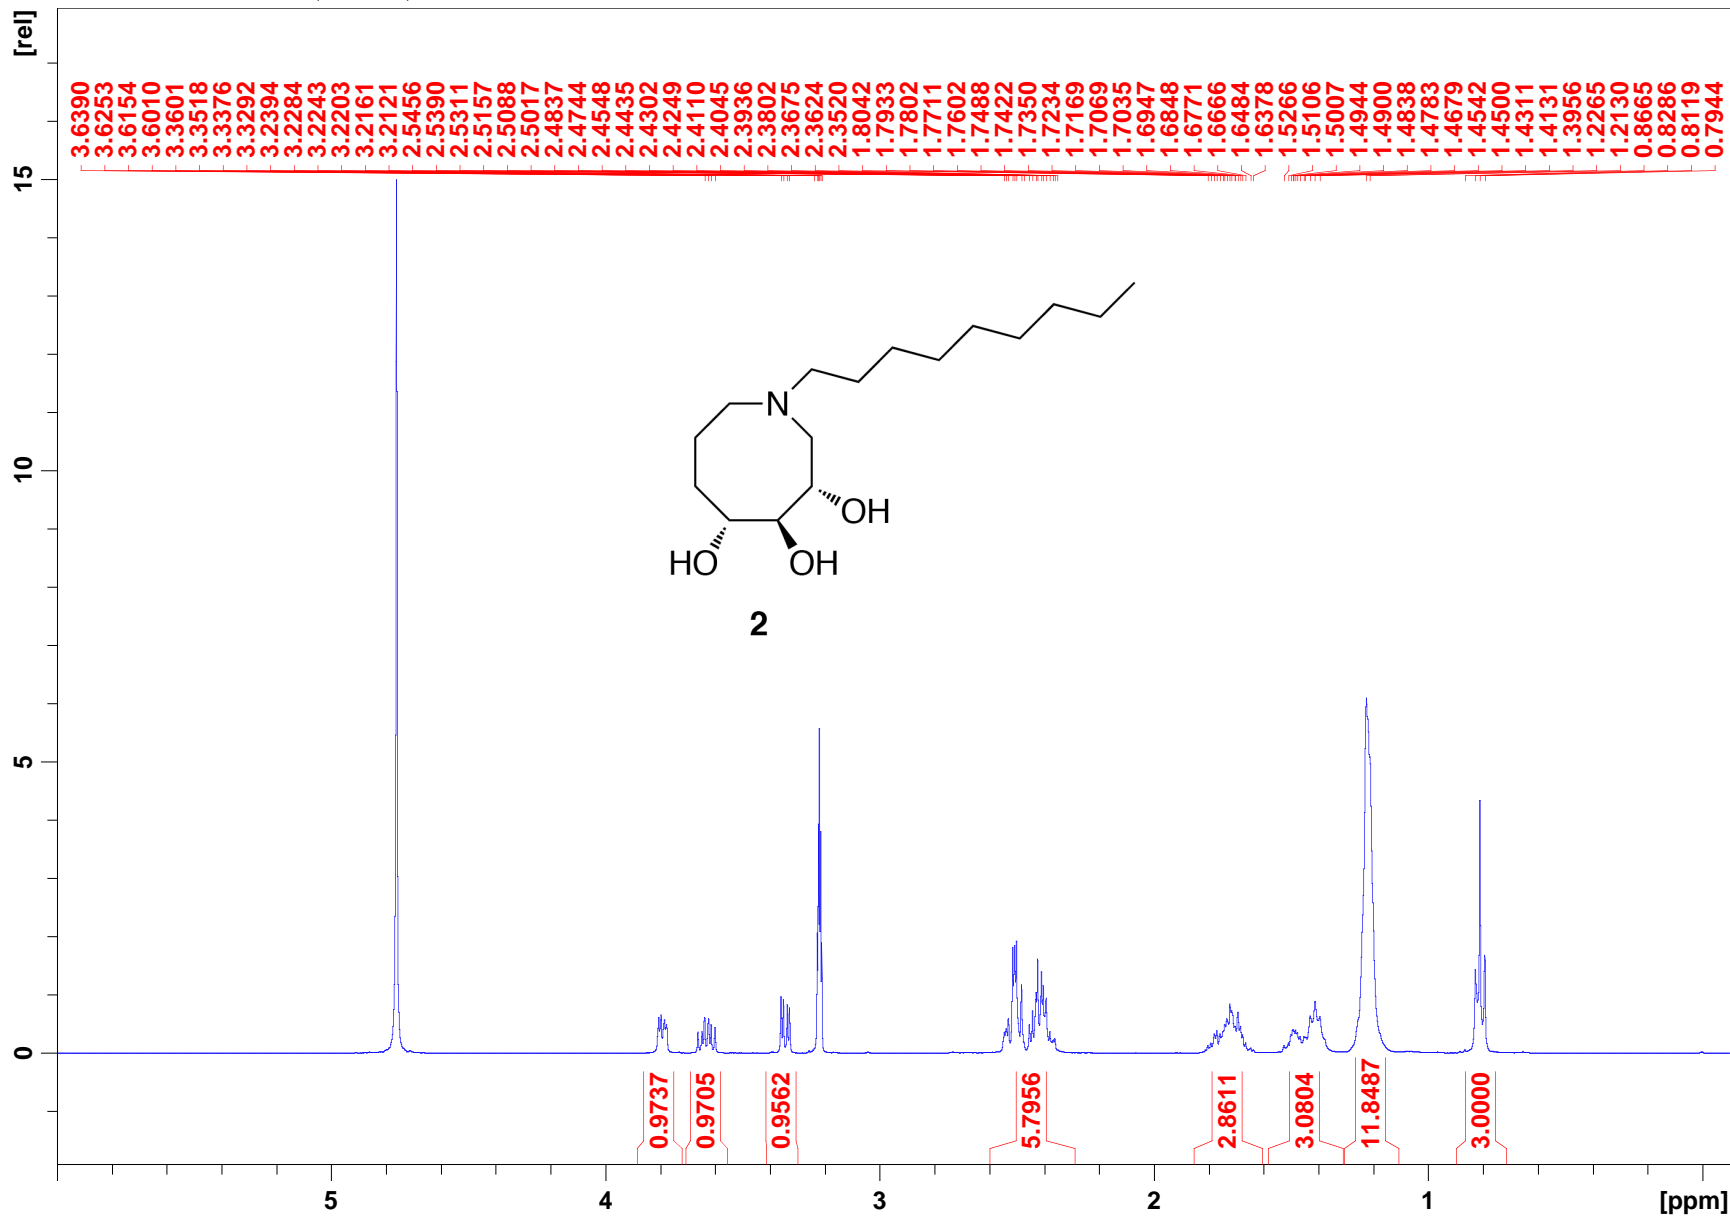

# 13C-NMR

JL-030708 3 1 C:\Bruker\TOPSPIN leex3451

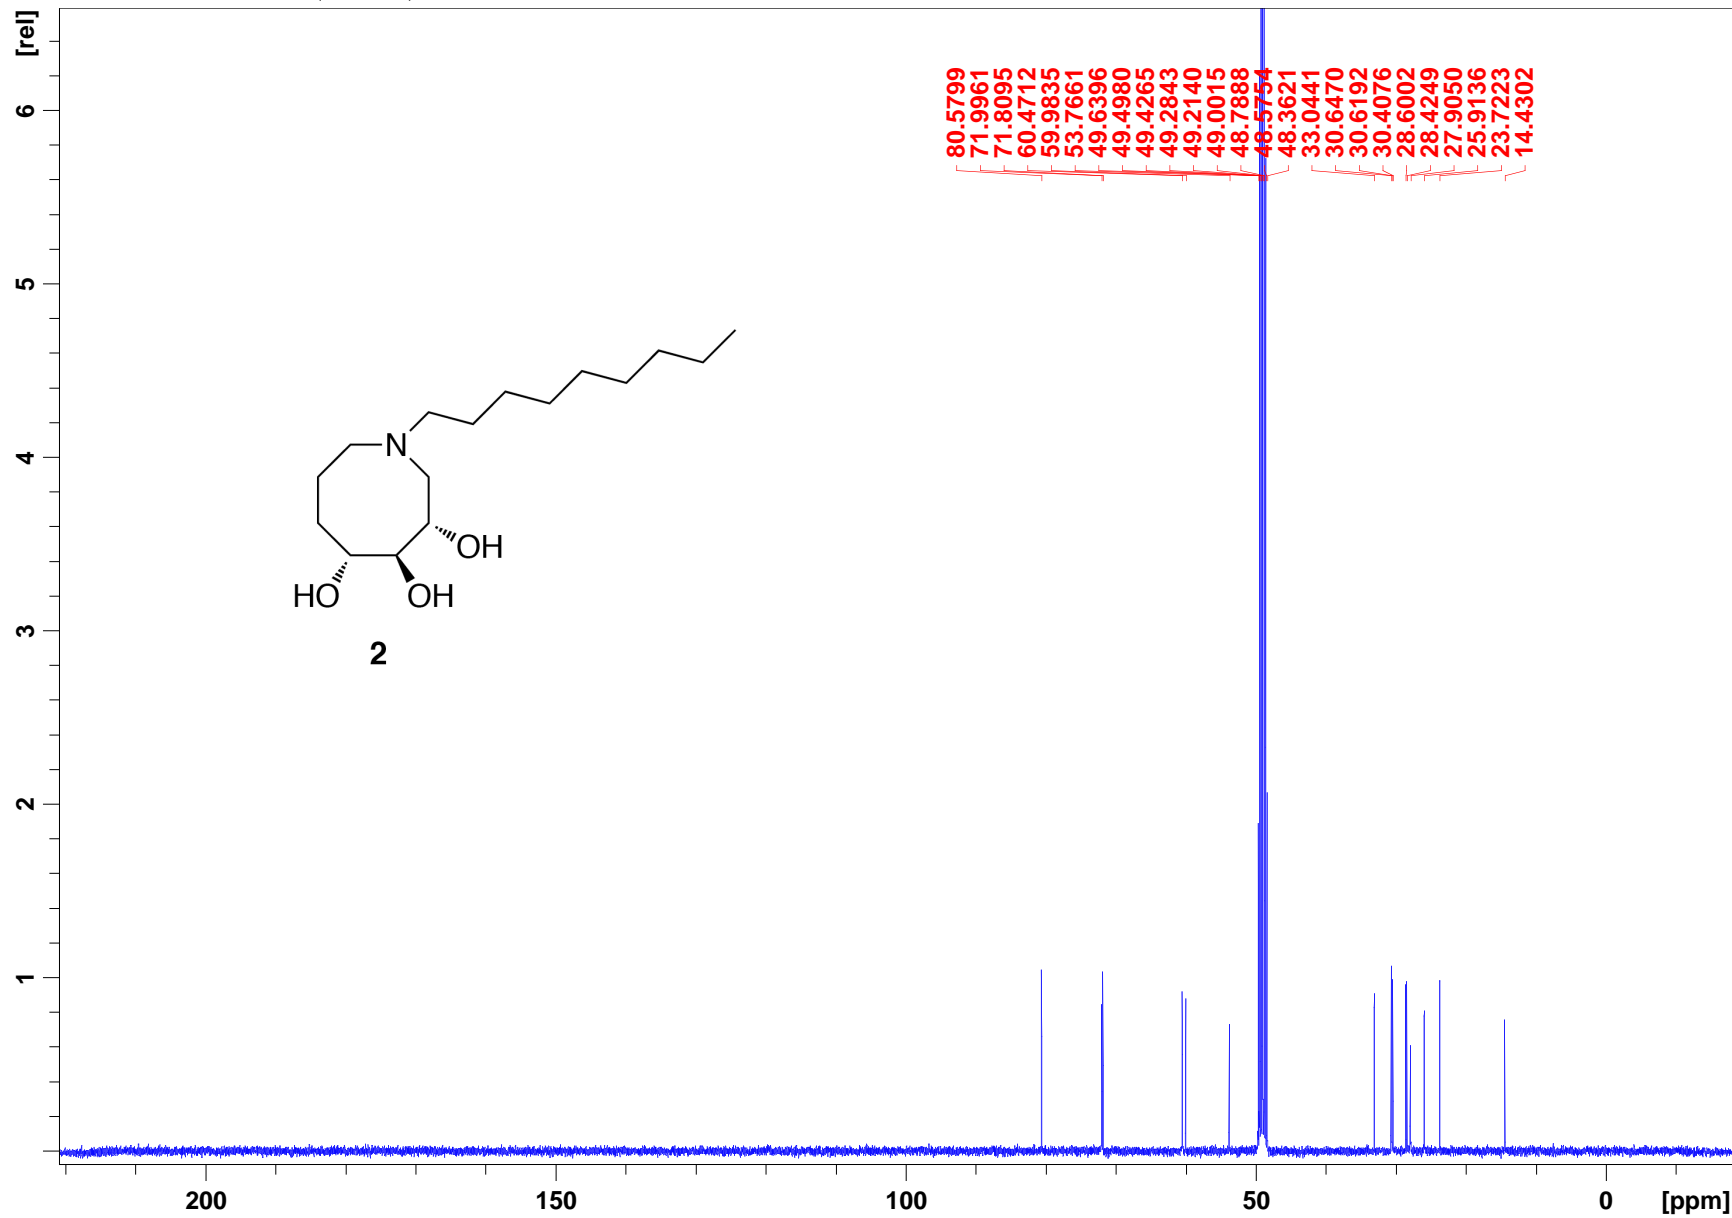

# 1H-NMR

JL-032008 1 1 C:\Bruker\TOPSPIN leex3451

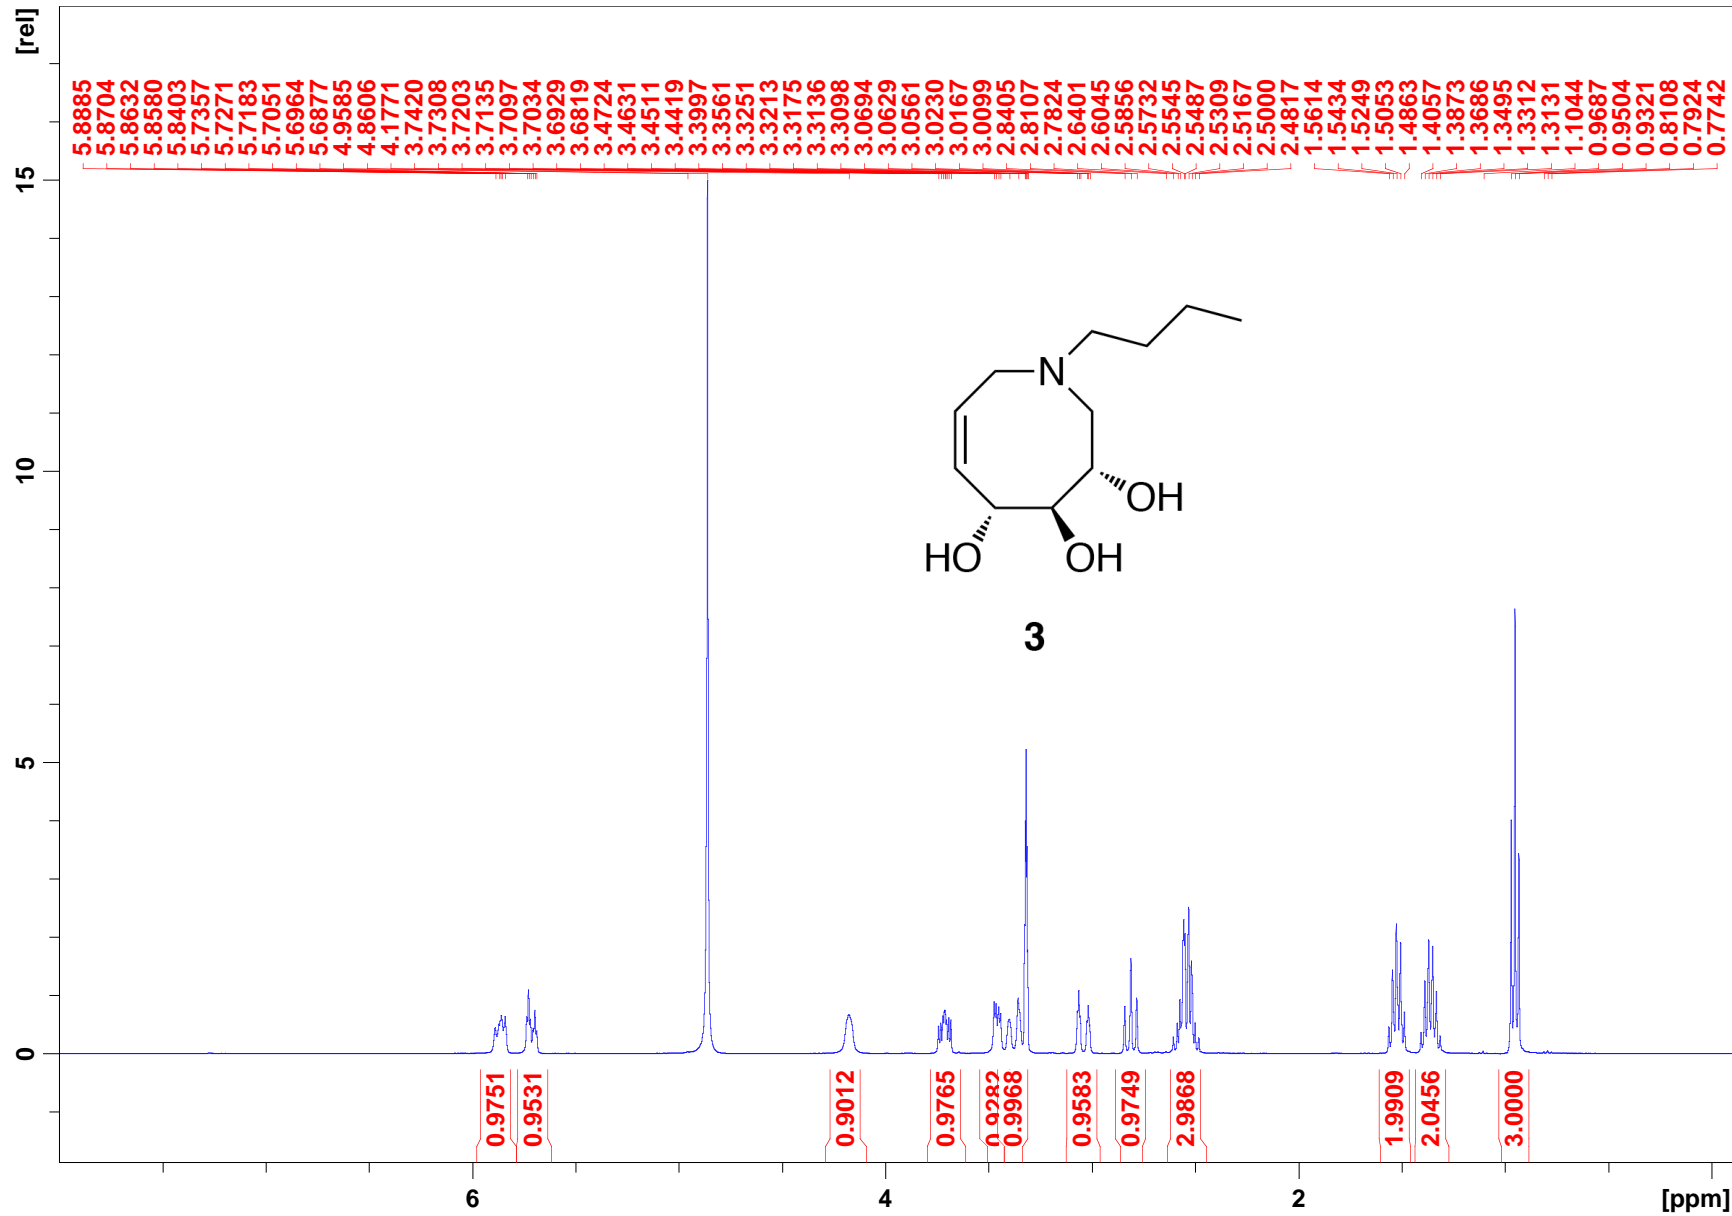



# 13C-NMR

JL-032008 3 1 C:\Bruker\TOPSPIN leex3451

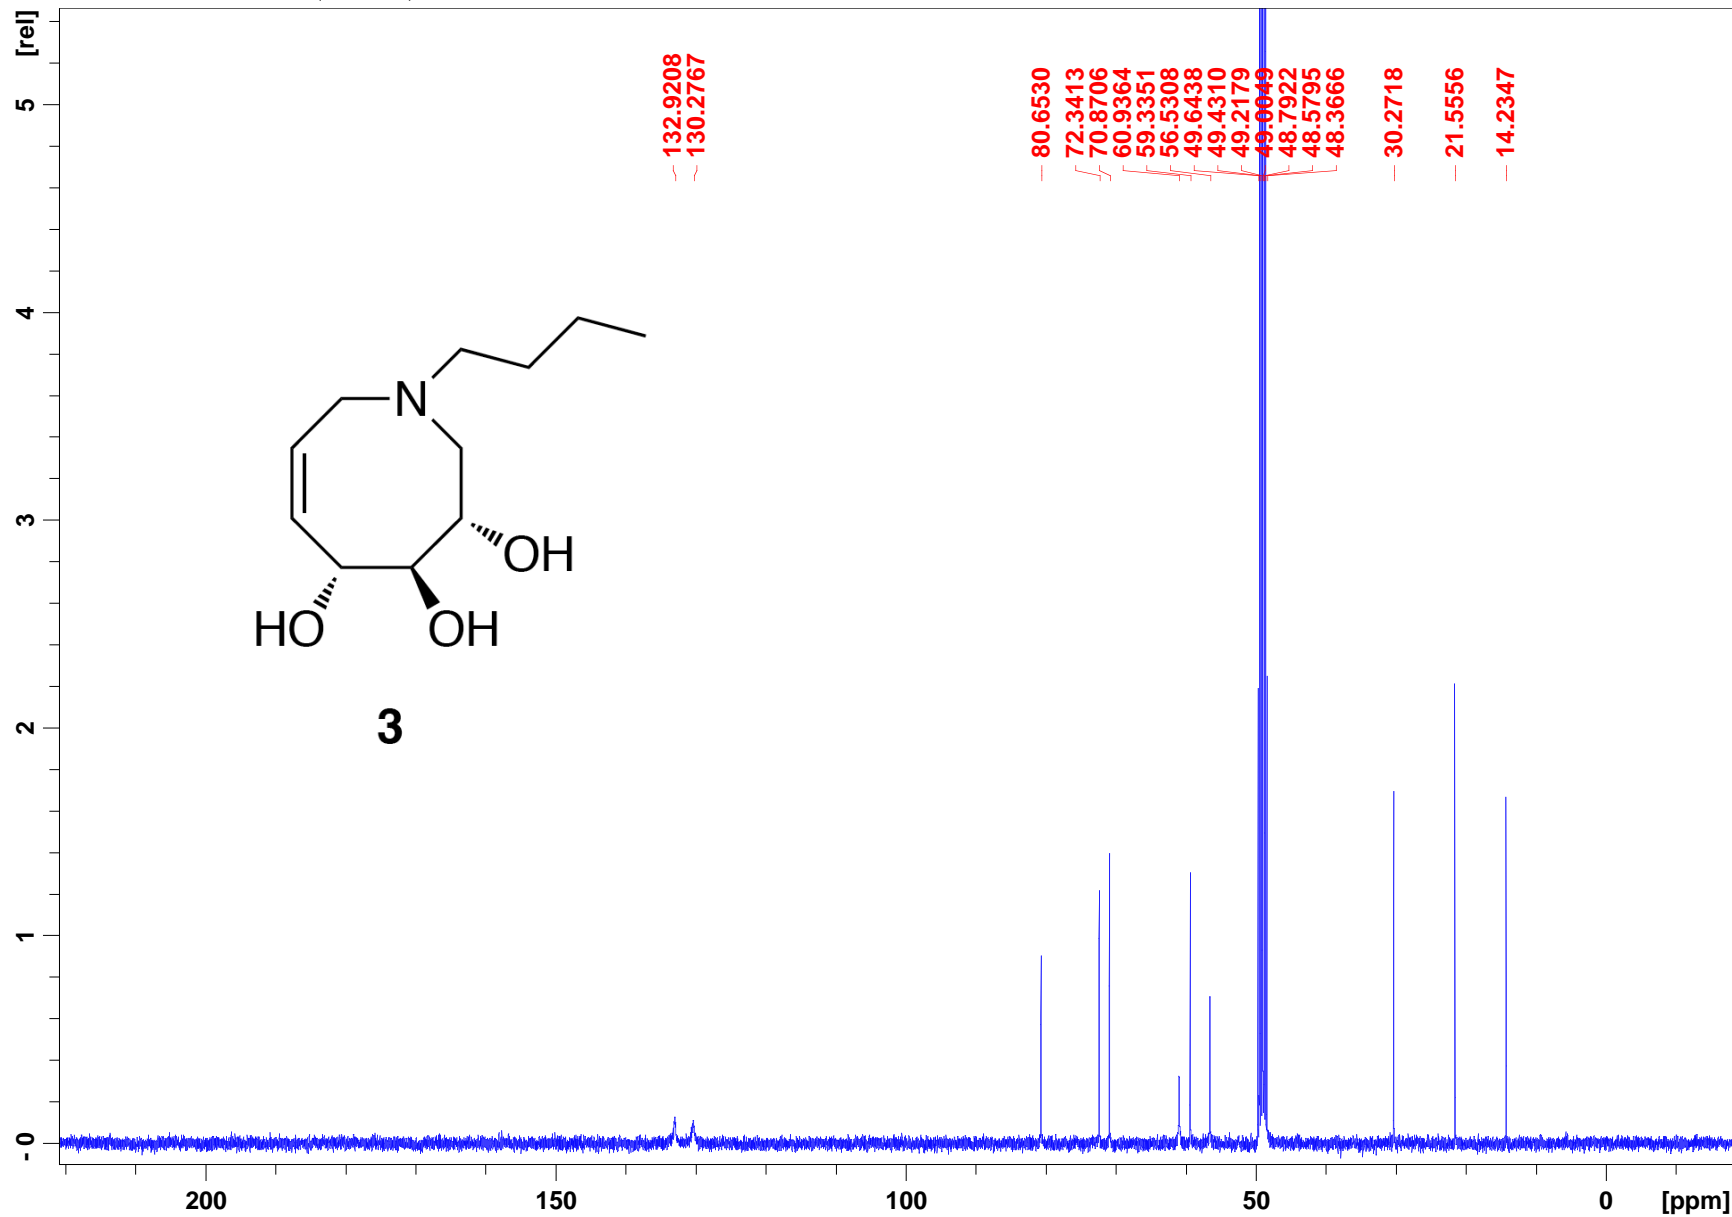

# 1H-NMR

JL-031908-1 1 1 C:\Bruker\TOPSPIN leex3451

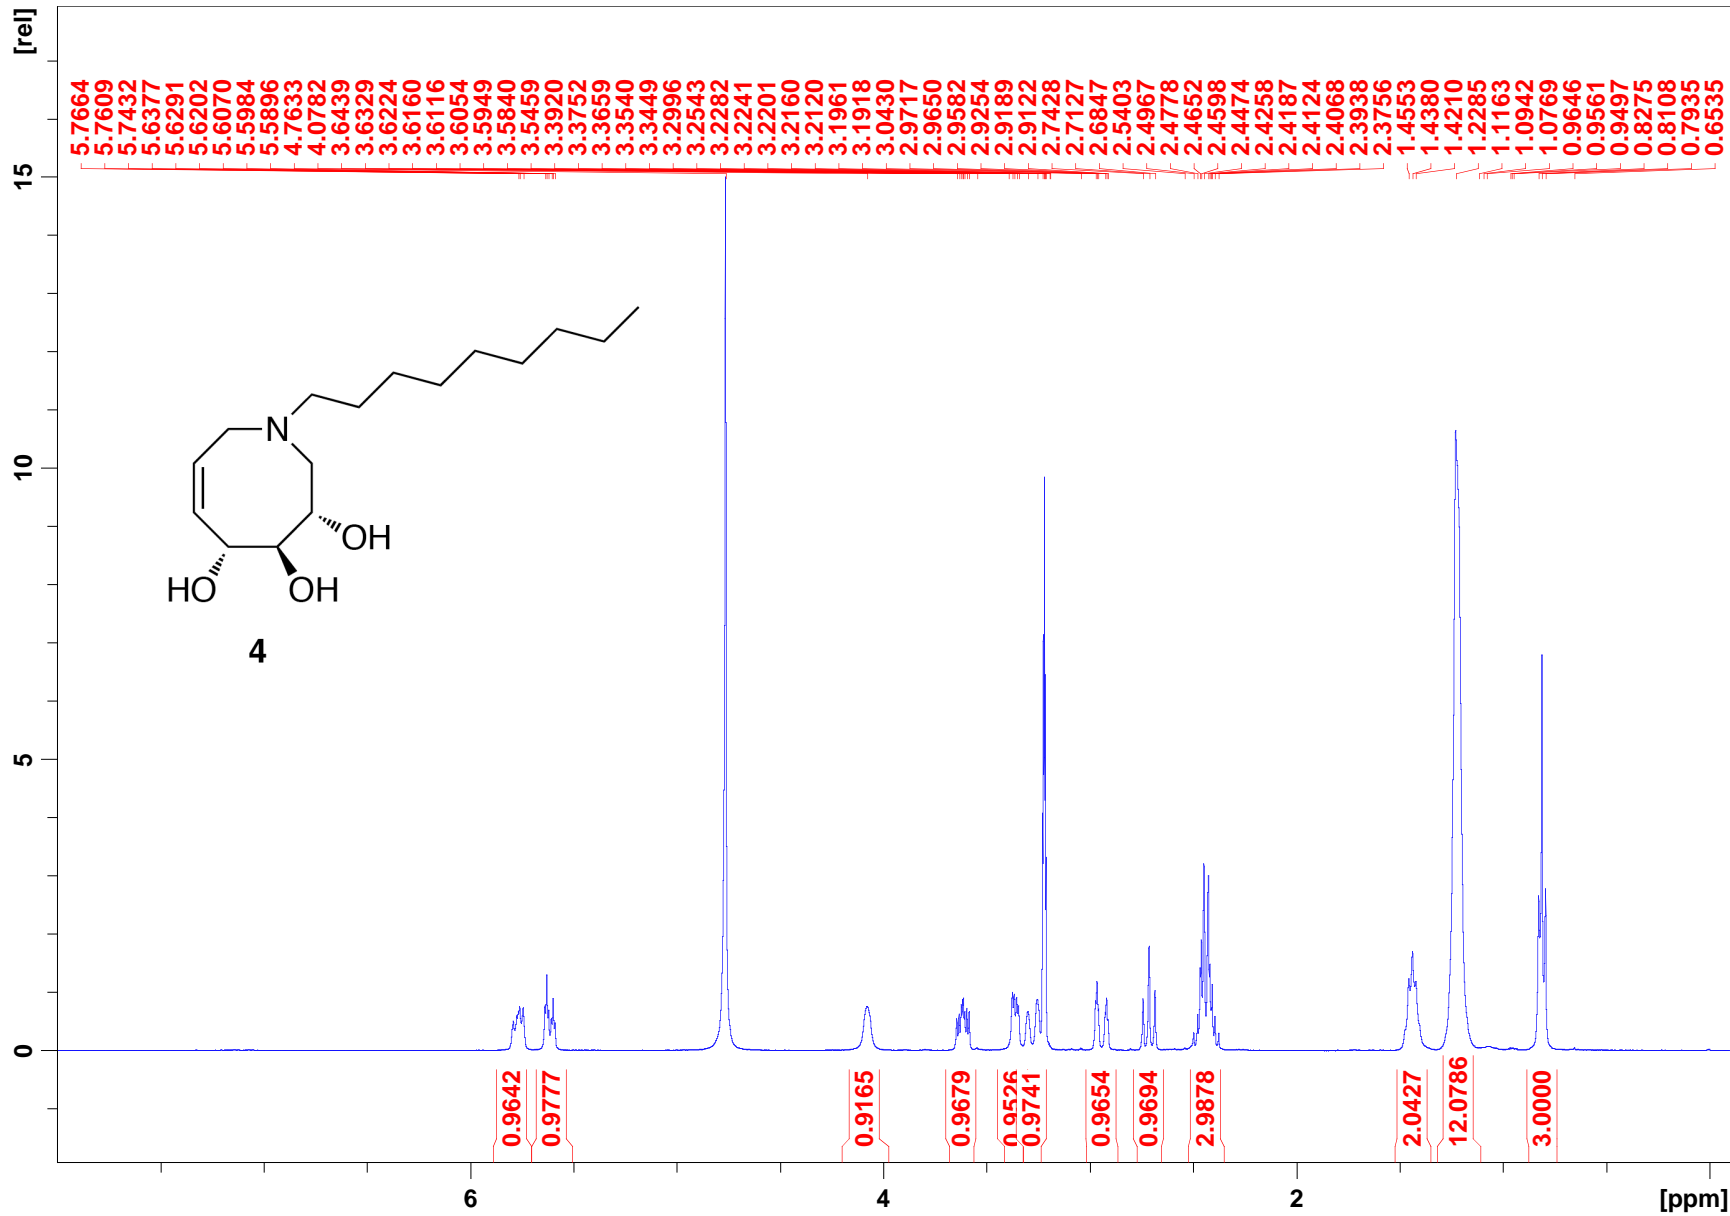

# 13C-NMR

JL-031908 3 1 C:\Bruker\TOPSPIN leex3451

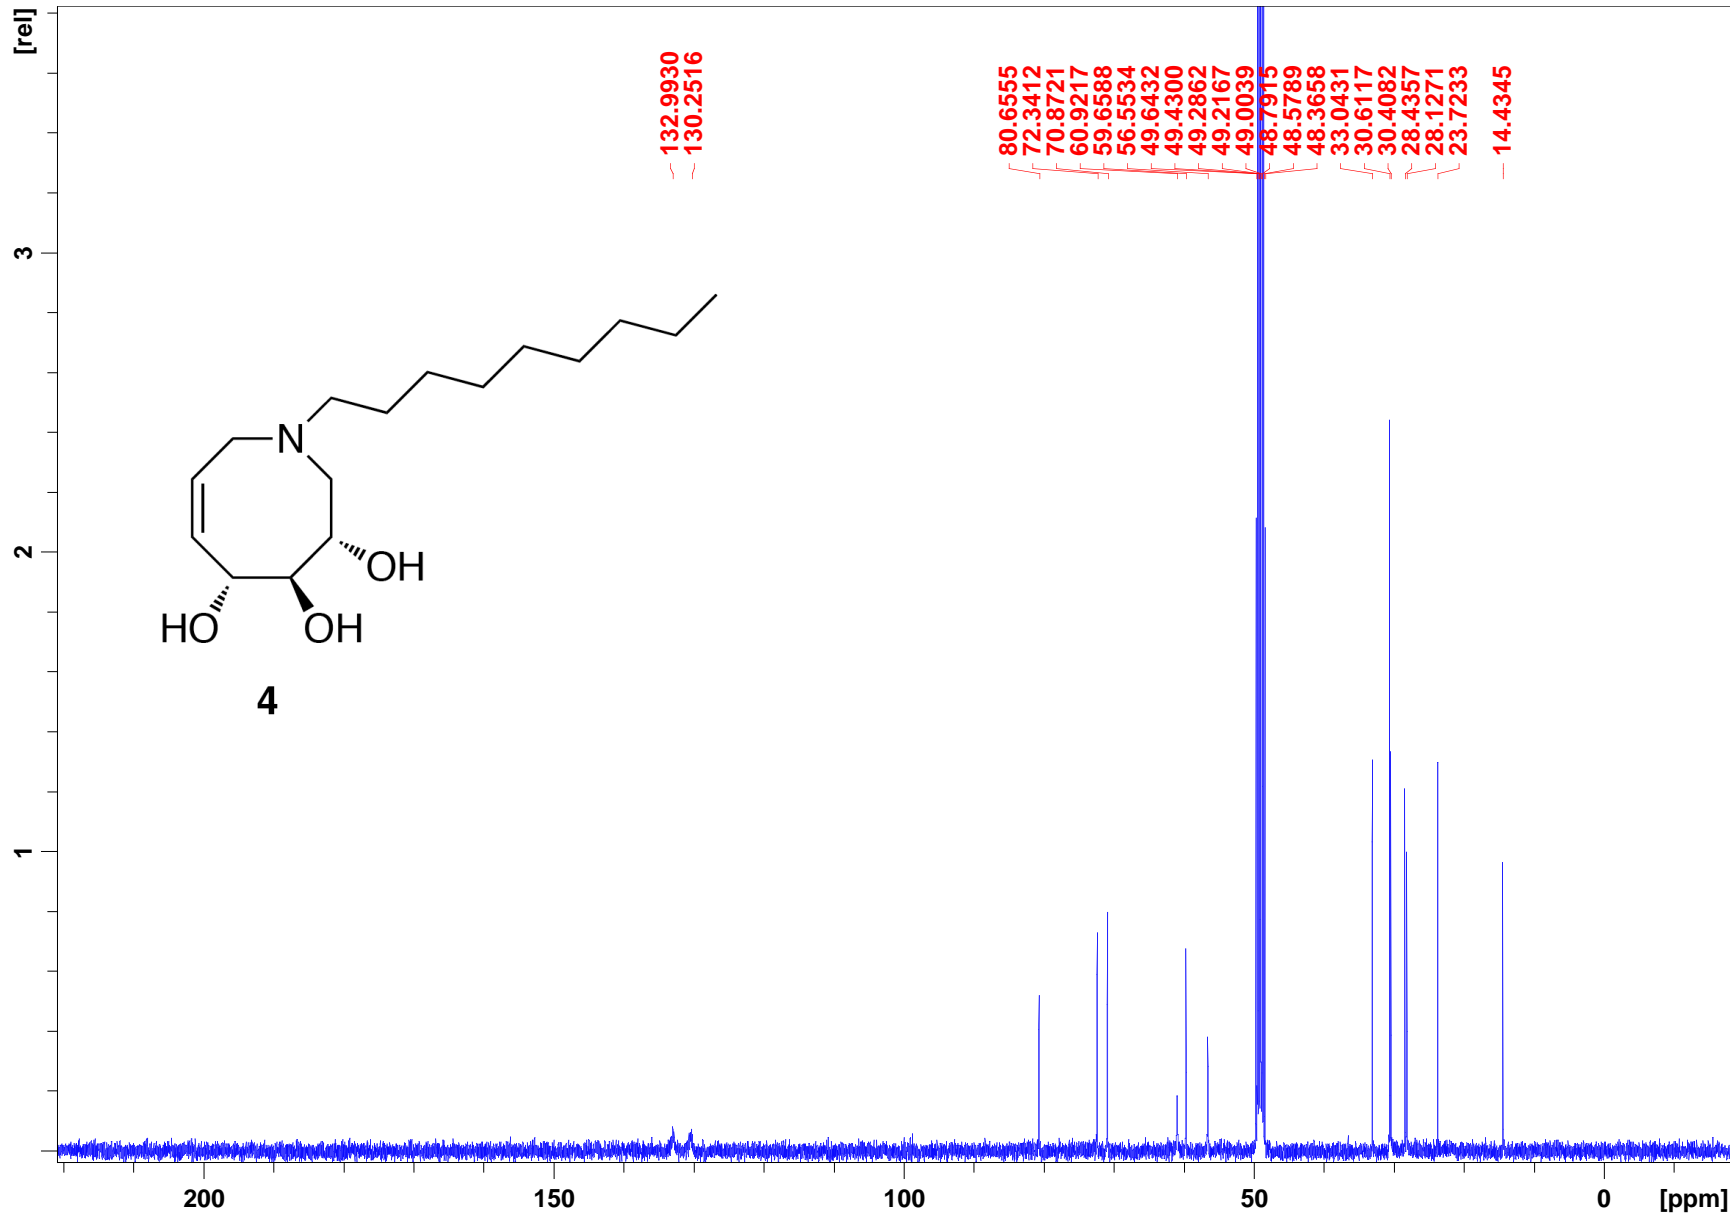

# 1H-NMR

JL-110107-B 1 1 C:\Bruker\TOPSPIN leex3451

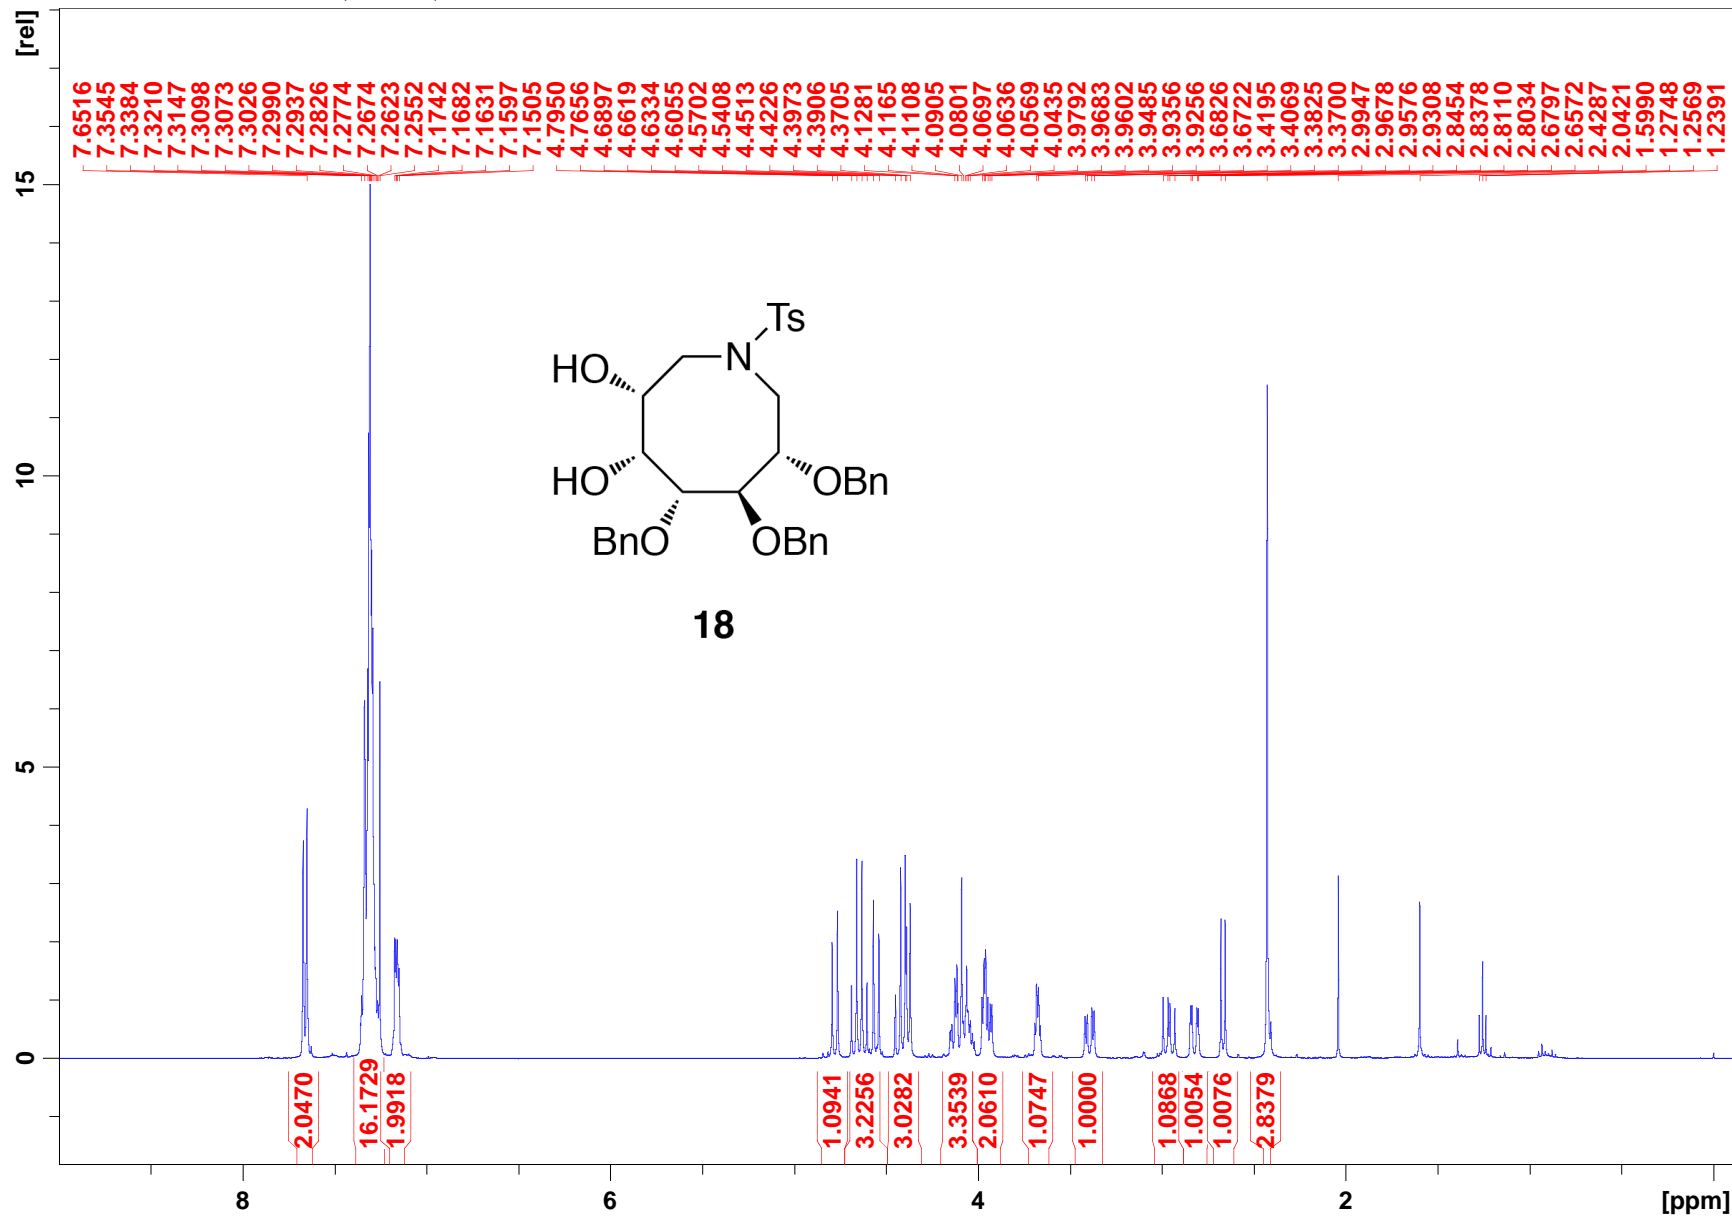

# 13C-NMR

JL-011208 12 1 C:\Bruker\TOPSPIN leex3451

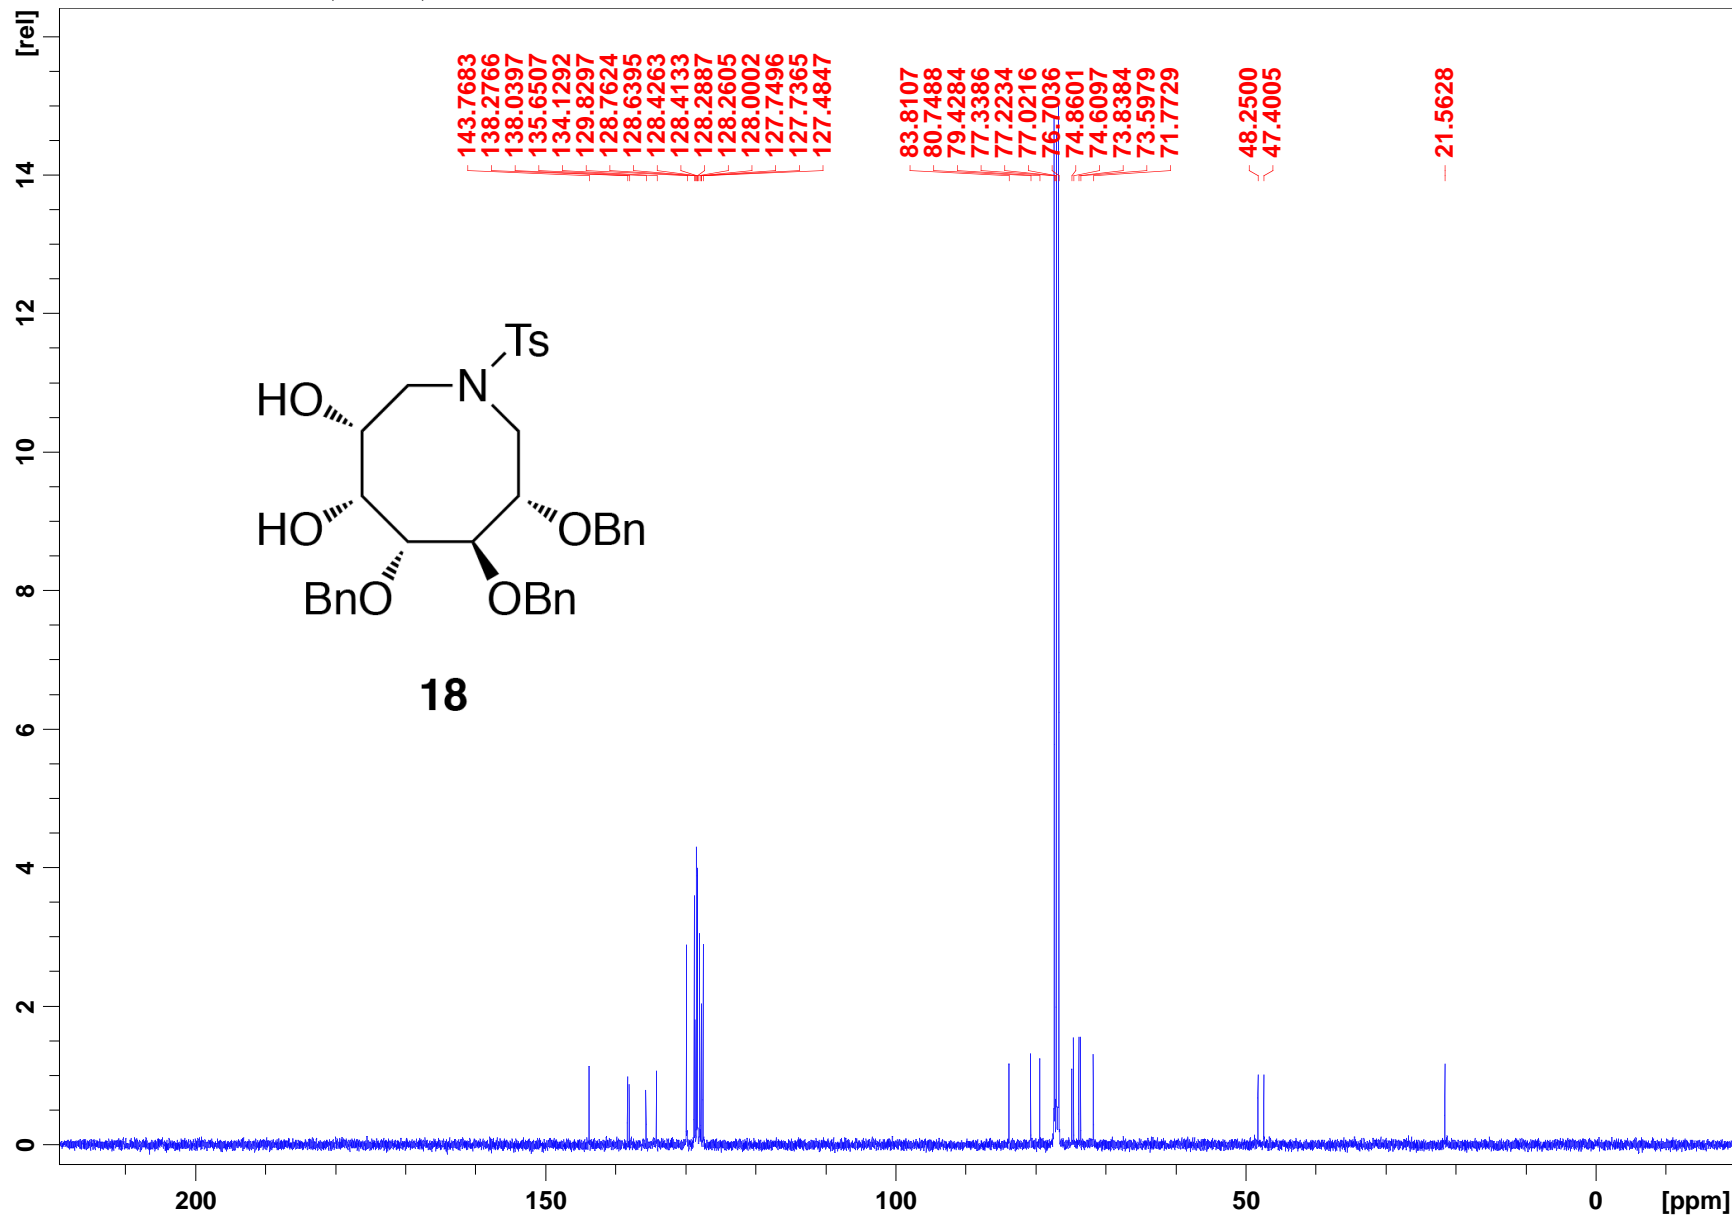

# 1H-NMR

JL-110807 1 1 C:\Bruker\TOPSPIN leex3451

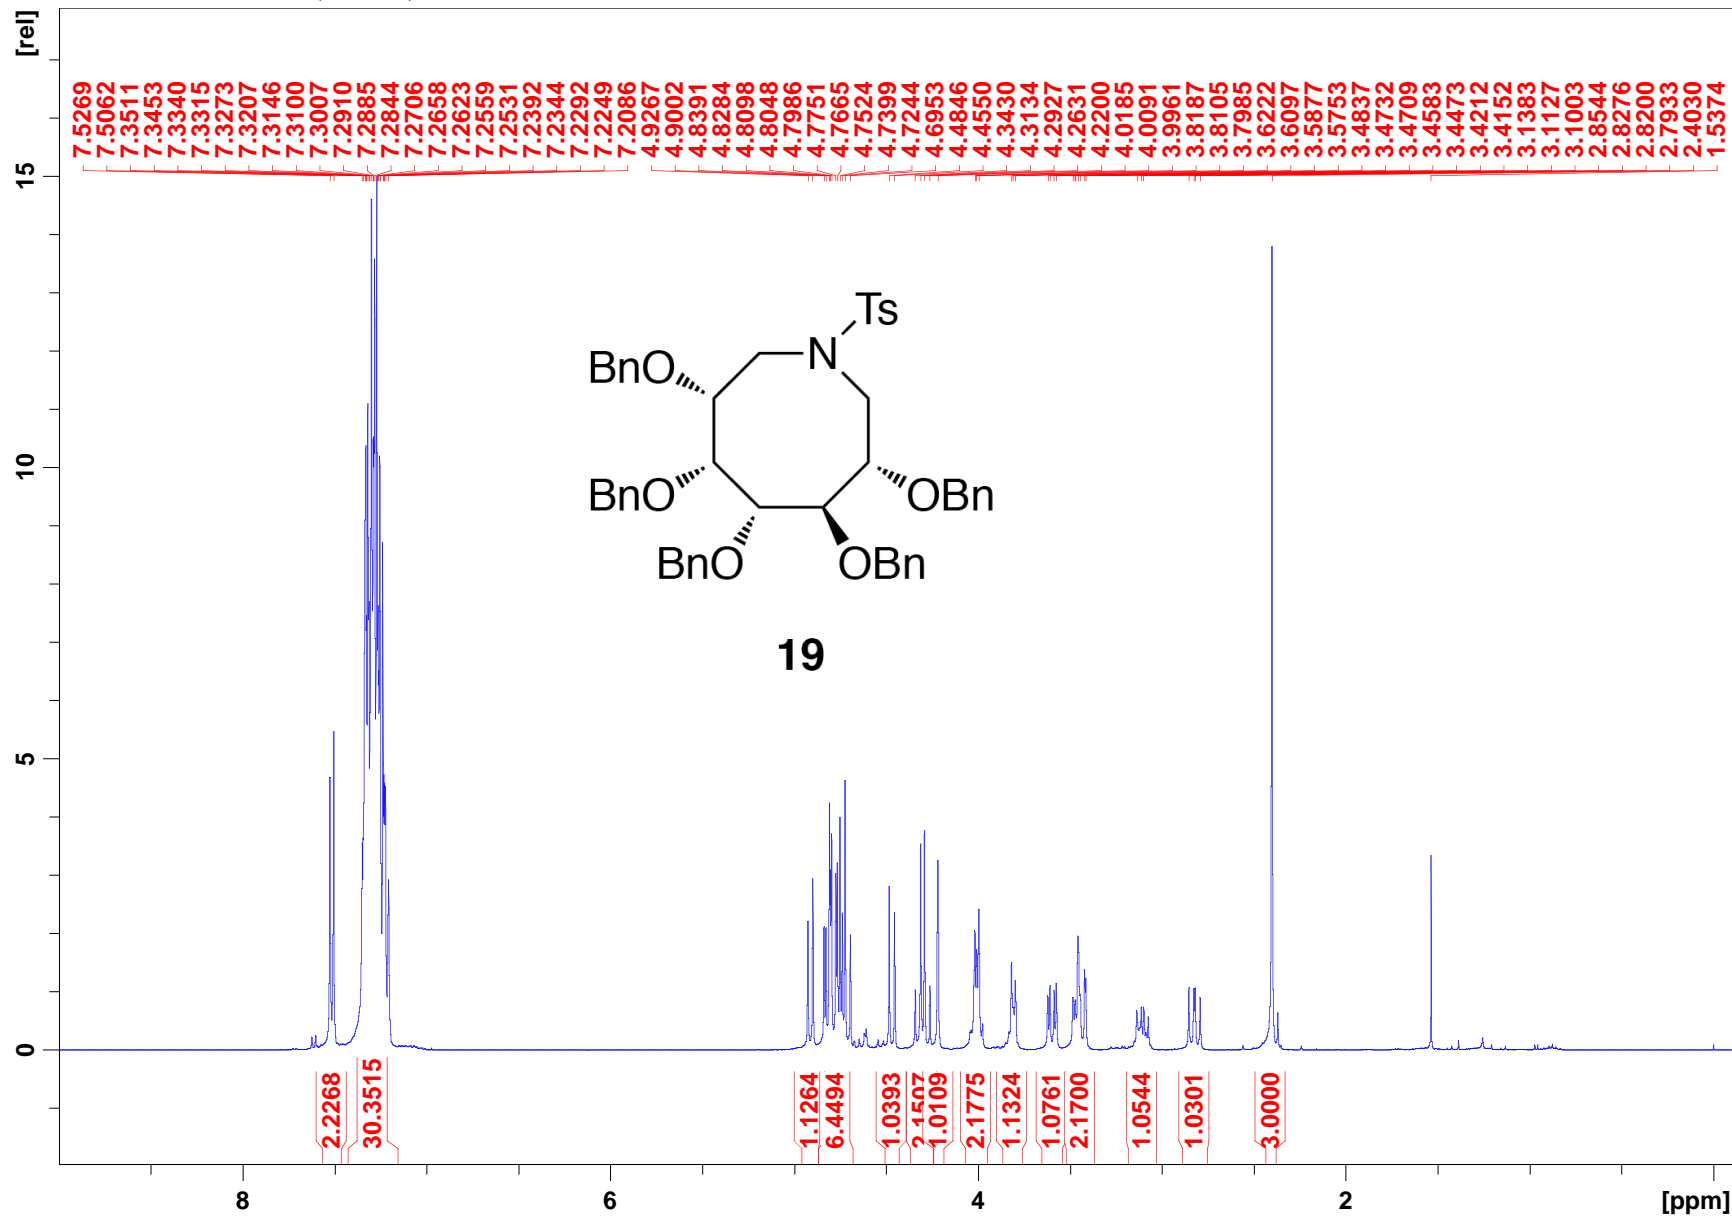

# 13C-NMR

LJC-110807 4 1 C:\Bruker\TOPSPIN leex3451

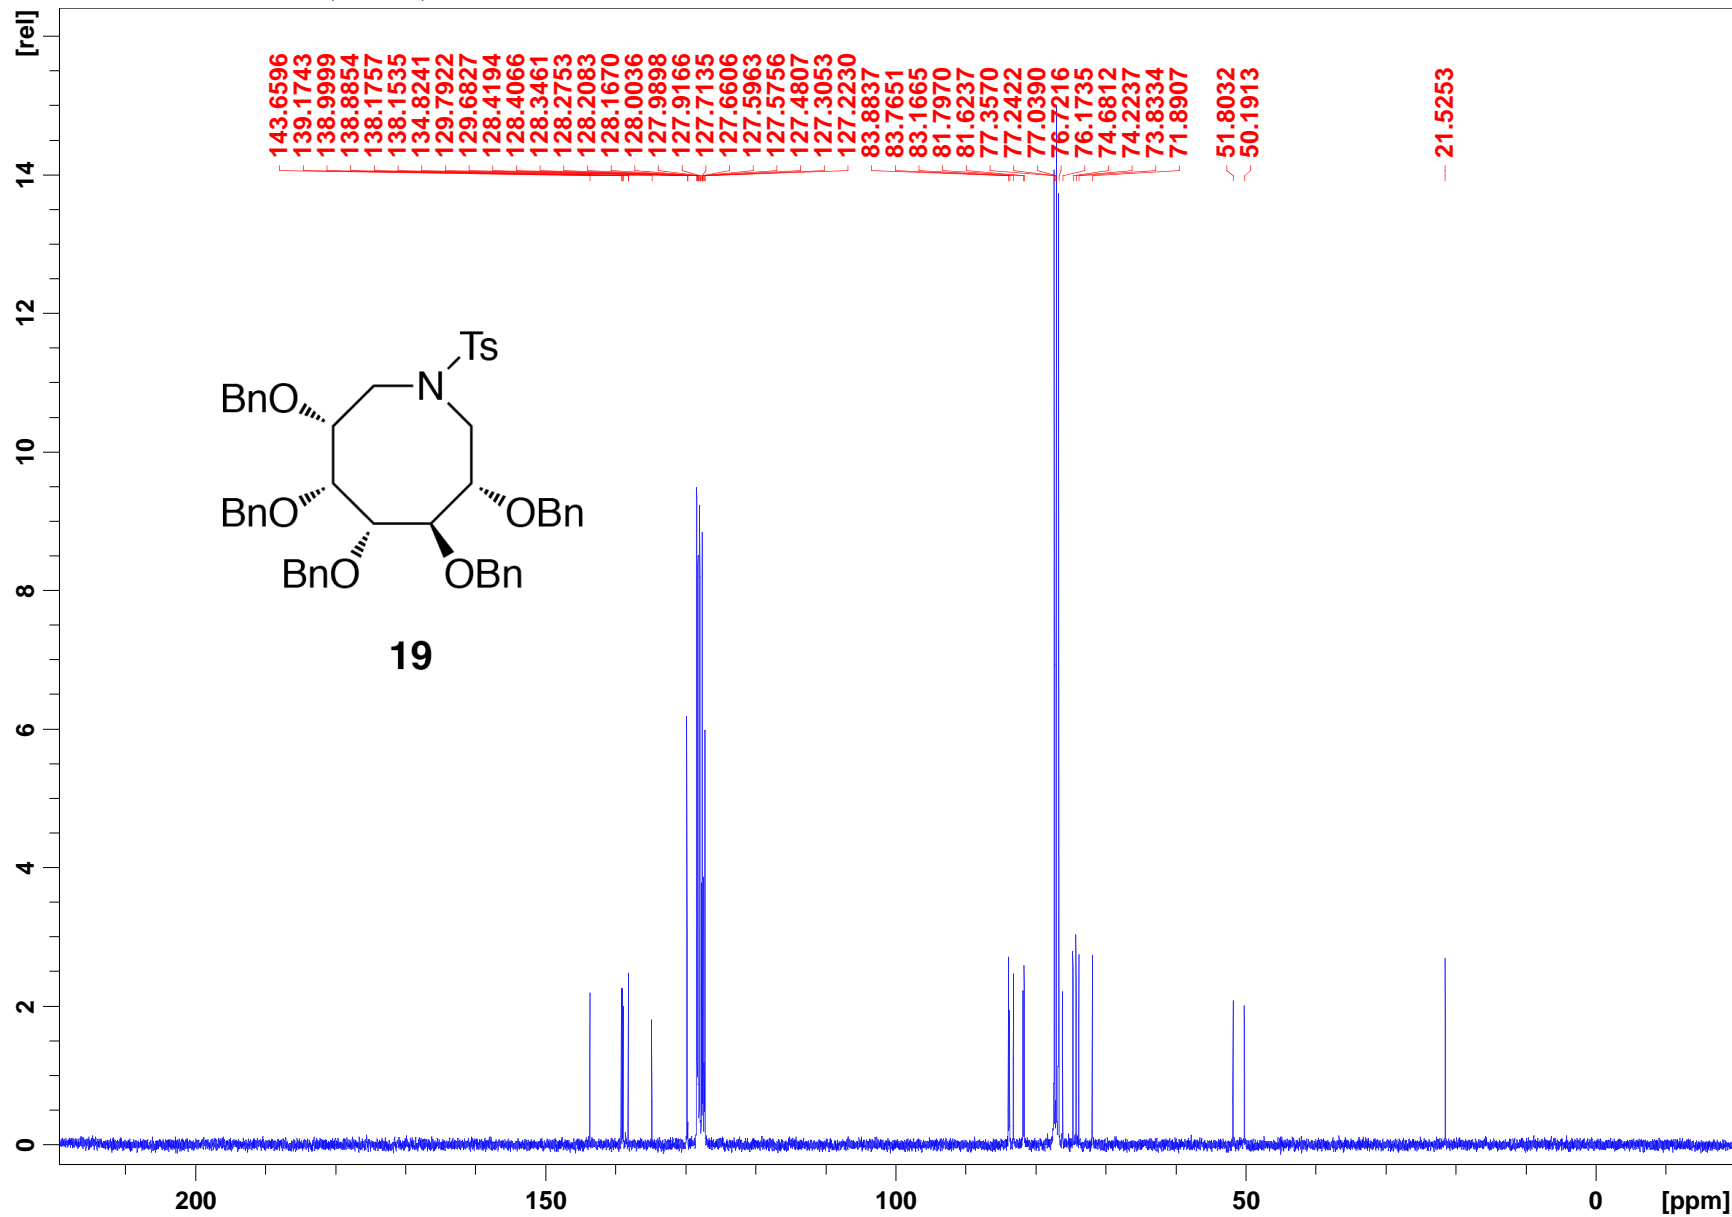

# 1H-NMR

JL-111907 1 1 C:\Bruker\TOPSPIN leex3451

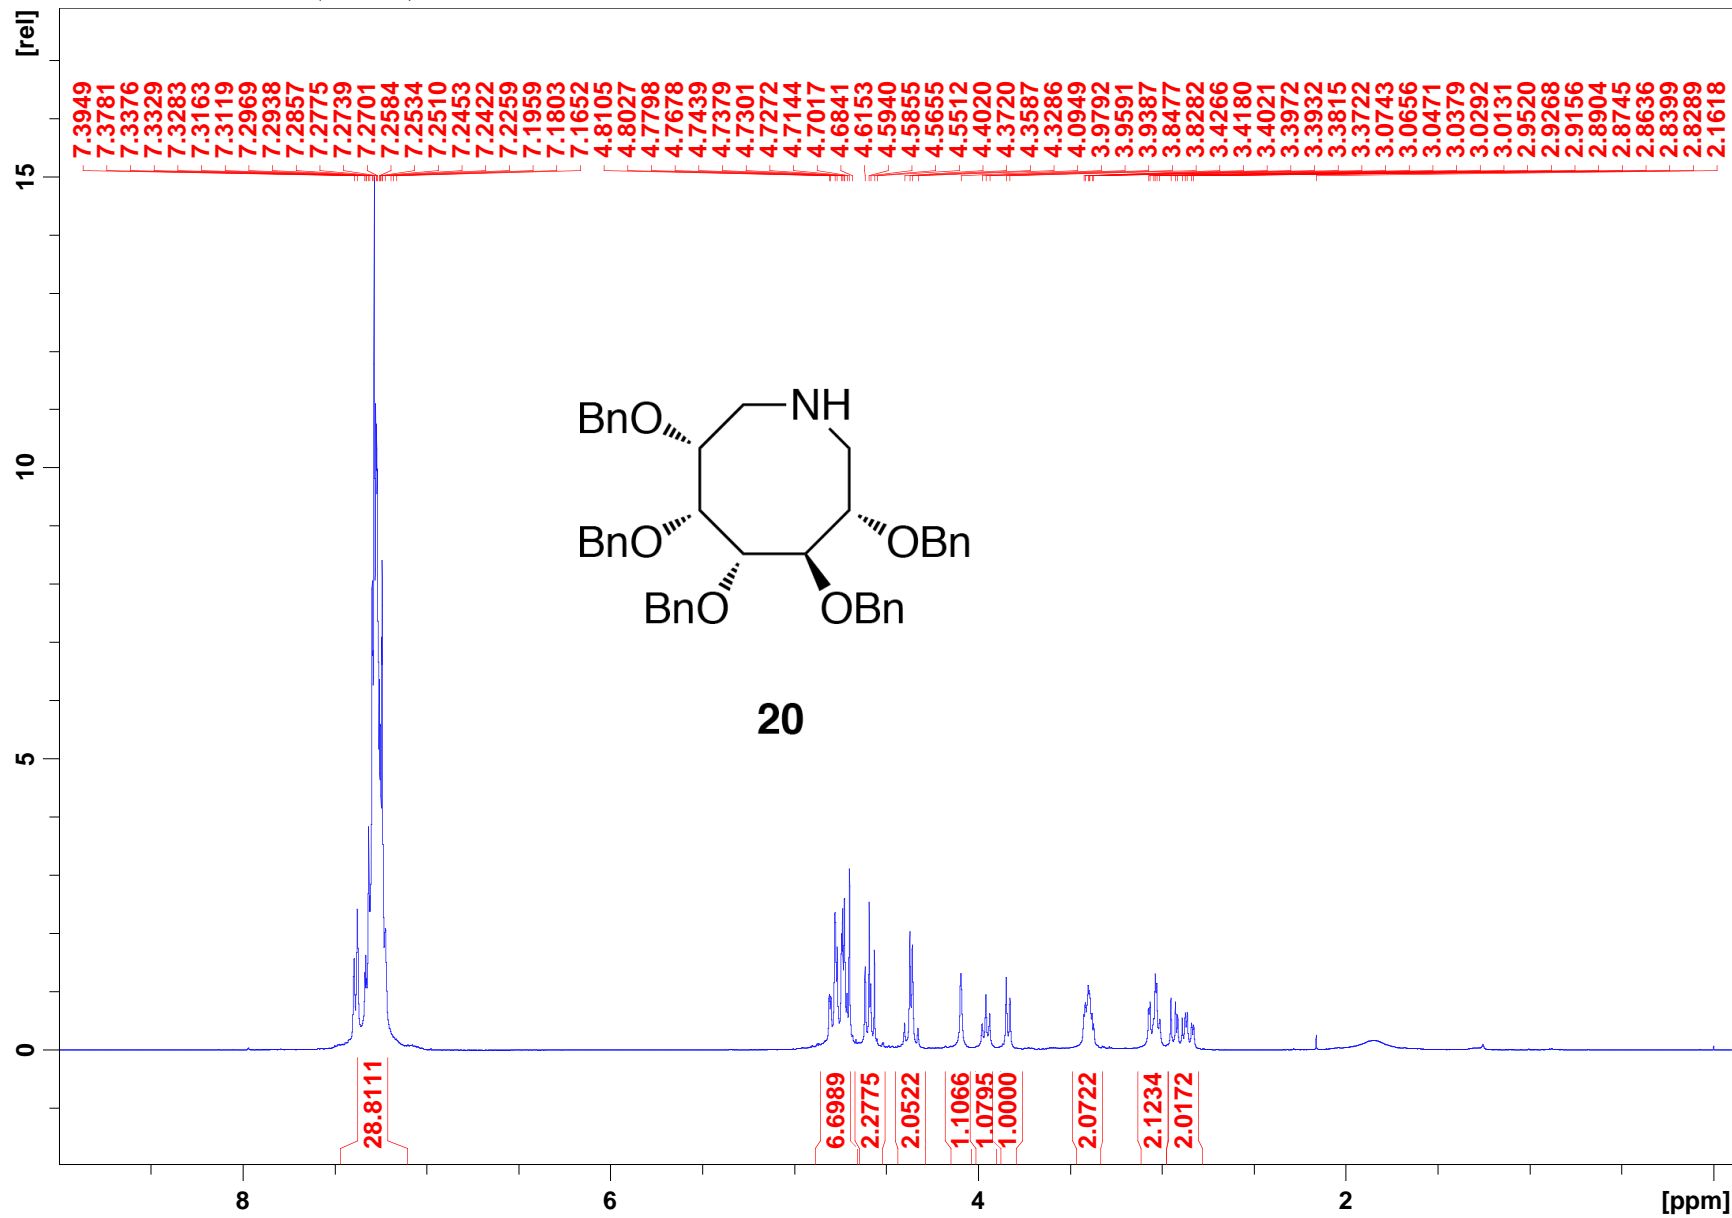



# 13C-NMR

JL-111907 3 1 C:\Bruker\TOPSPIN leex3451

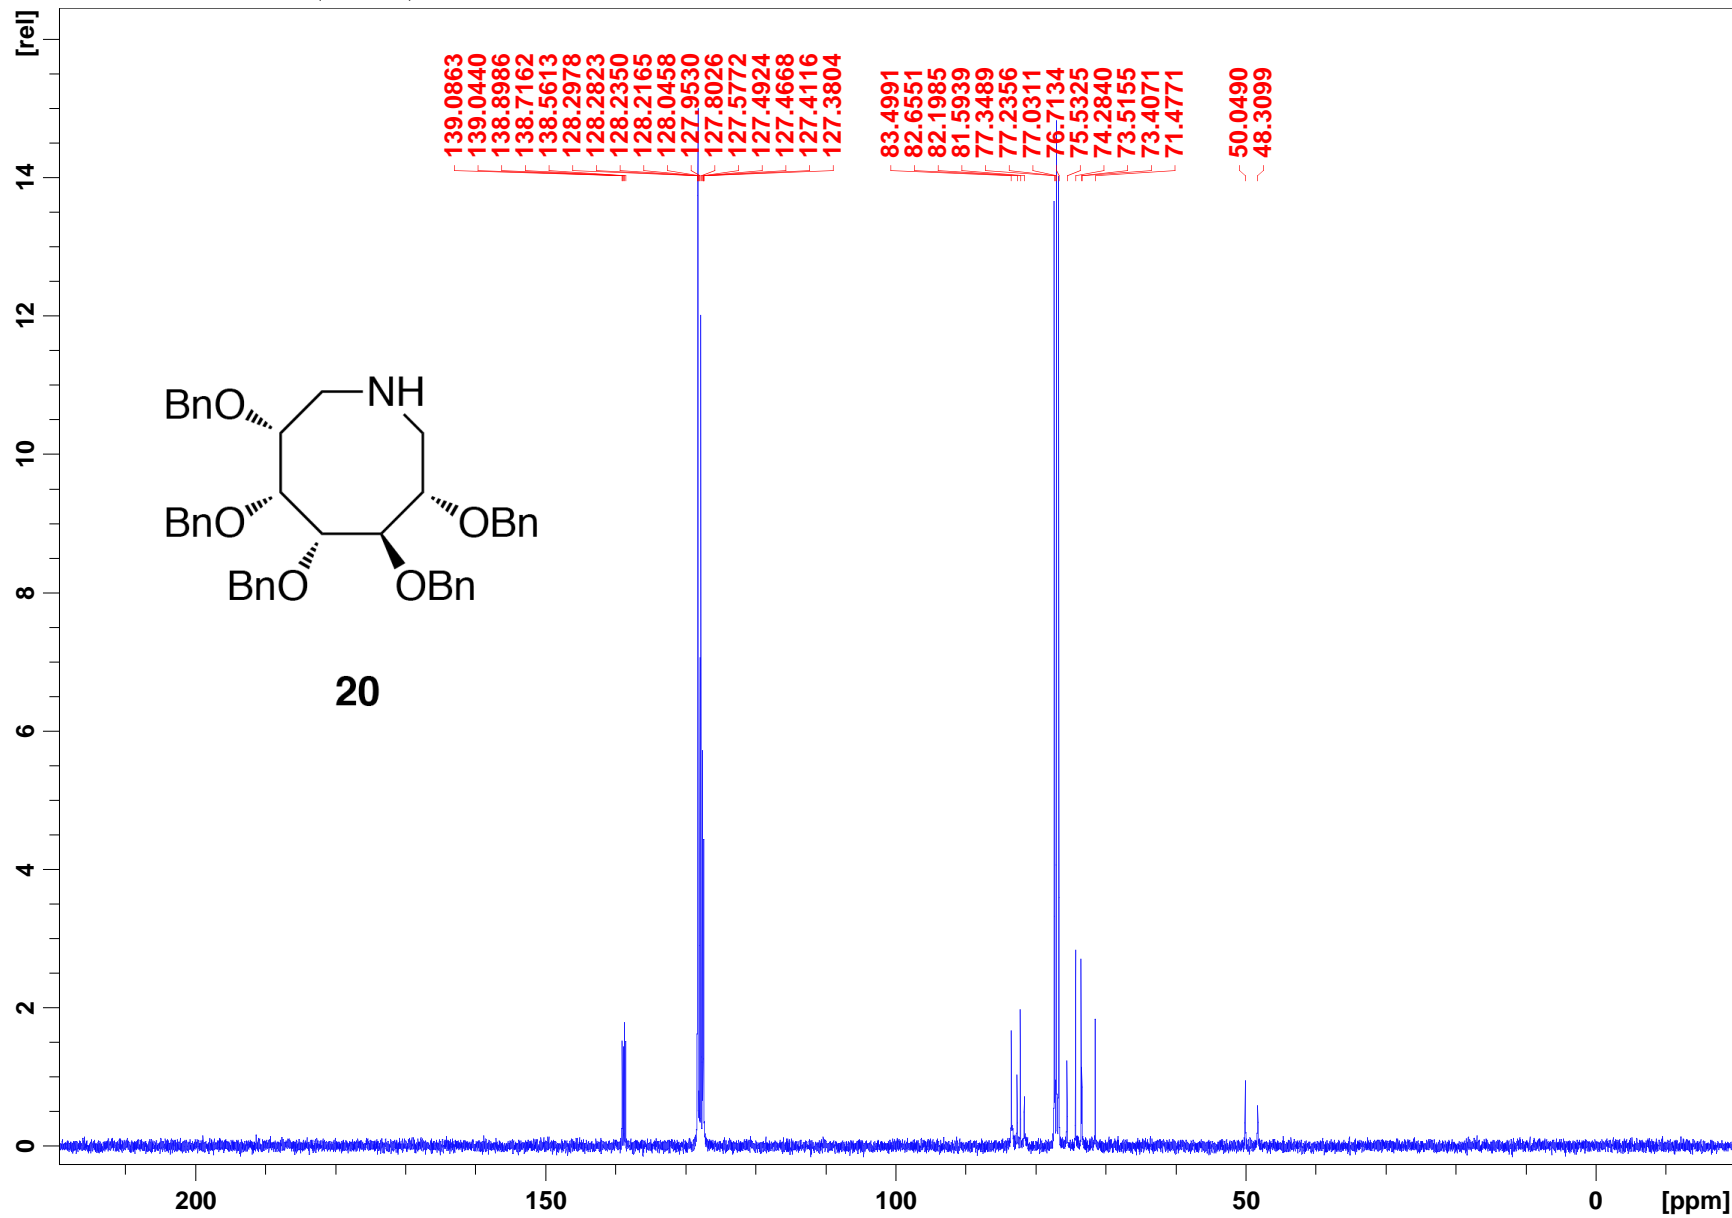

# 1H-NMR

JL-121807 1 1 C:\Bruker\TOPSPIN leex3451

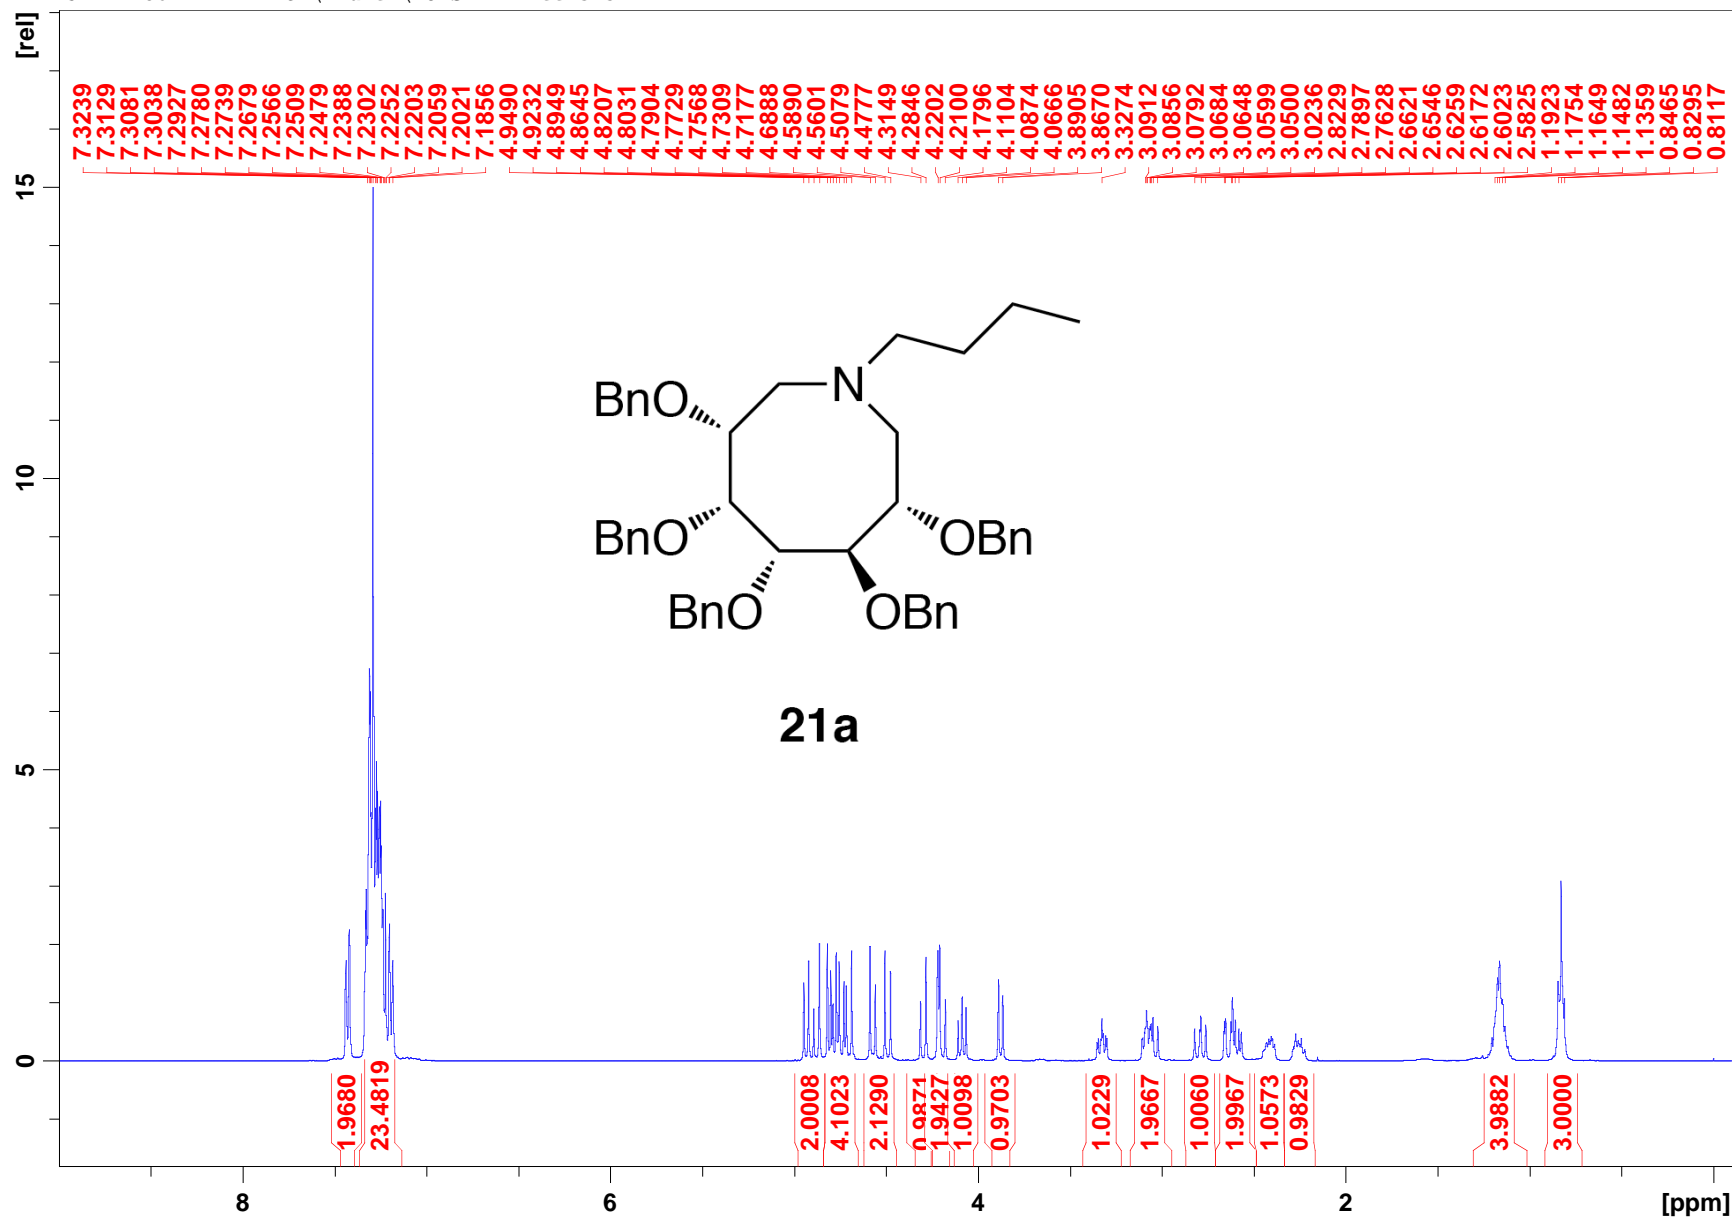

# 13C-NMR

JL-121807 3 1 C:\Bruker\TOPSPIN leex3451

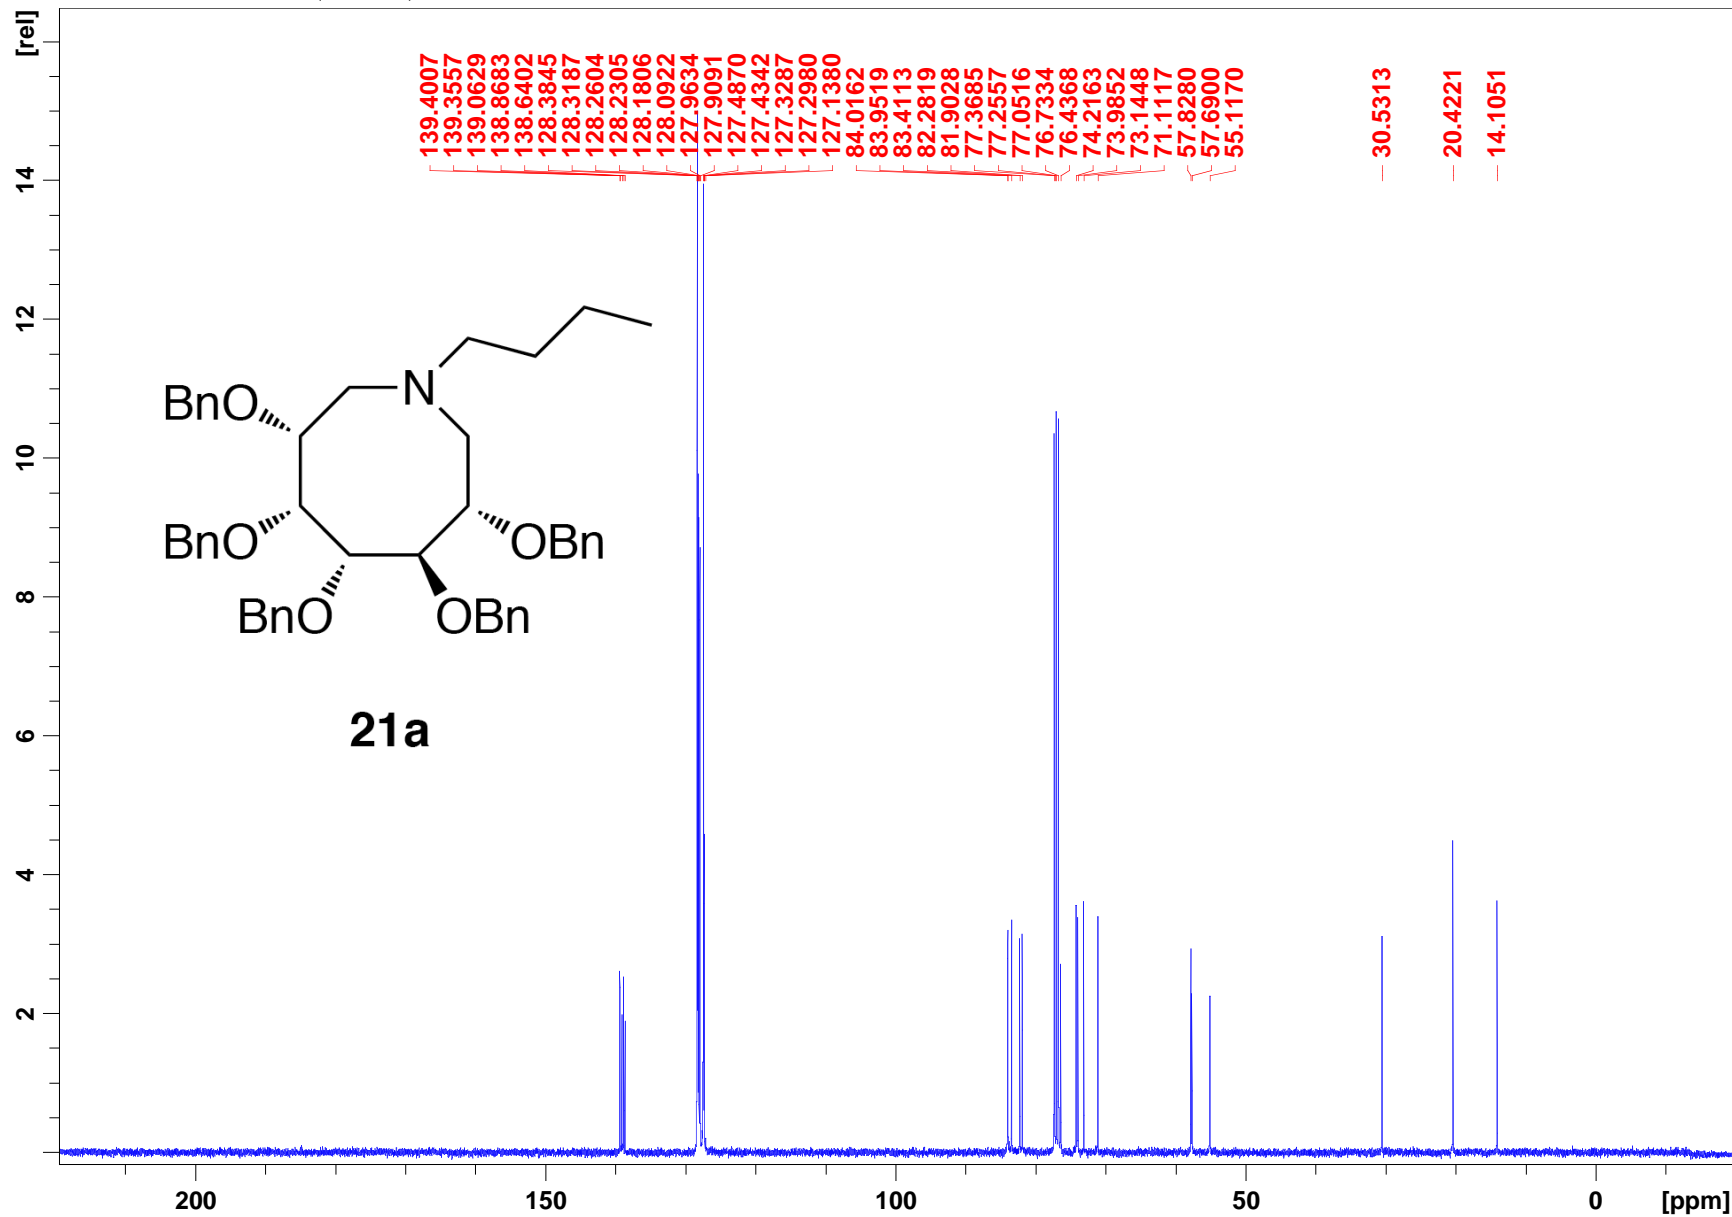

# 1H-NMR

JL-112207 1 1 C:\Bruker\TOPSPIN leex3451

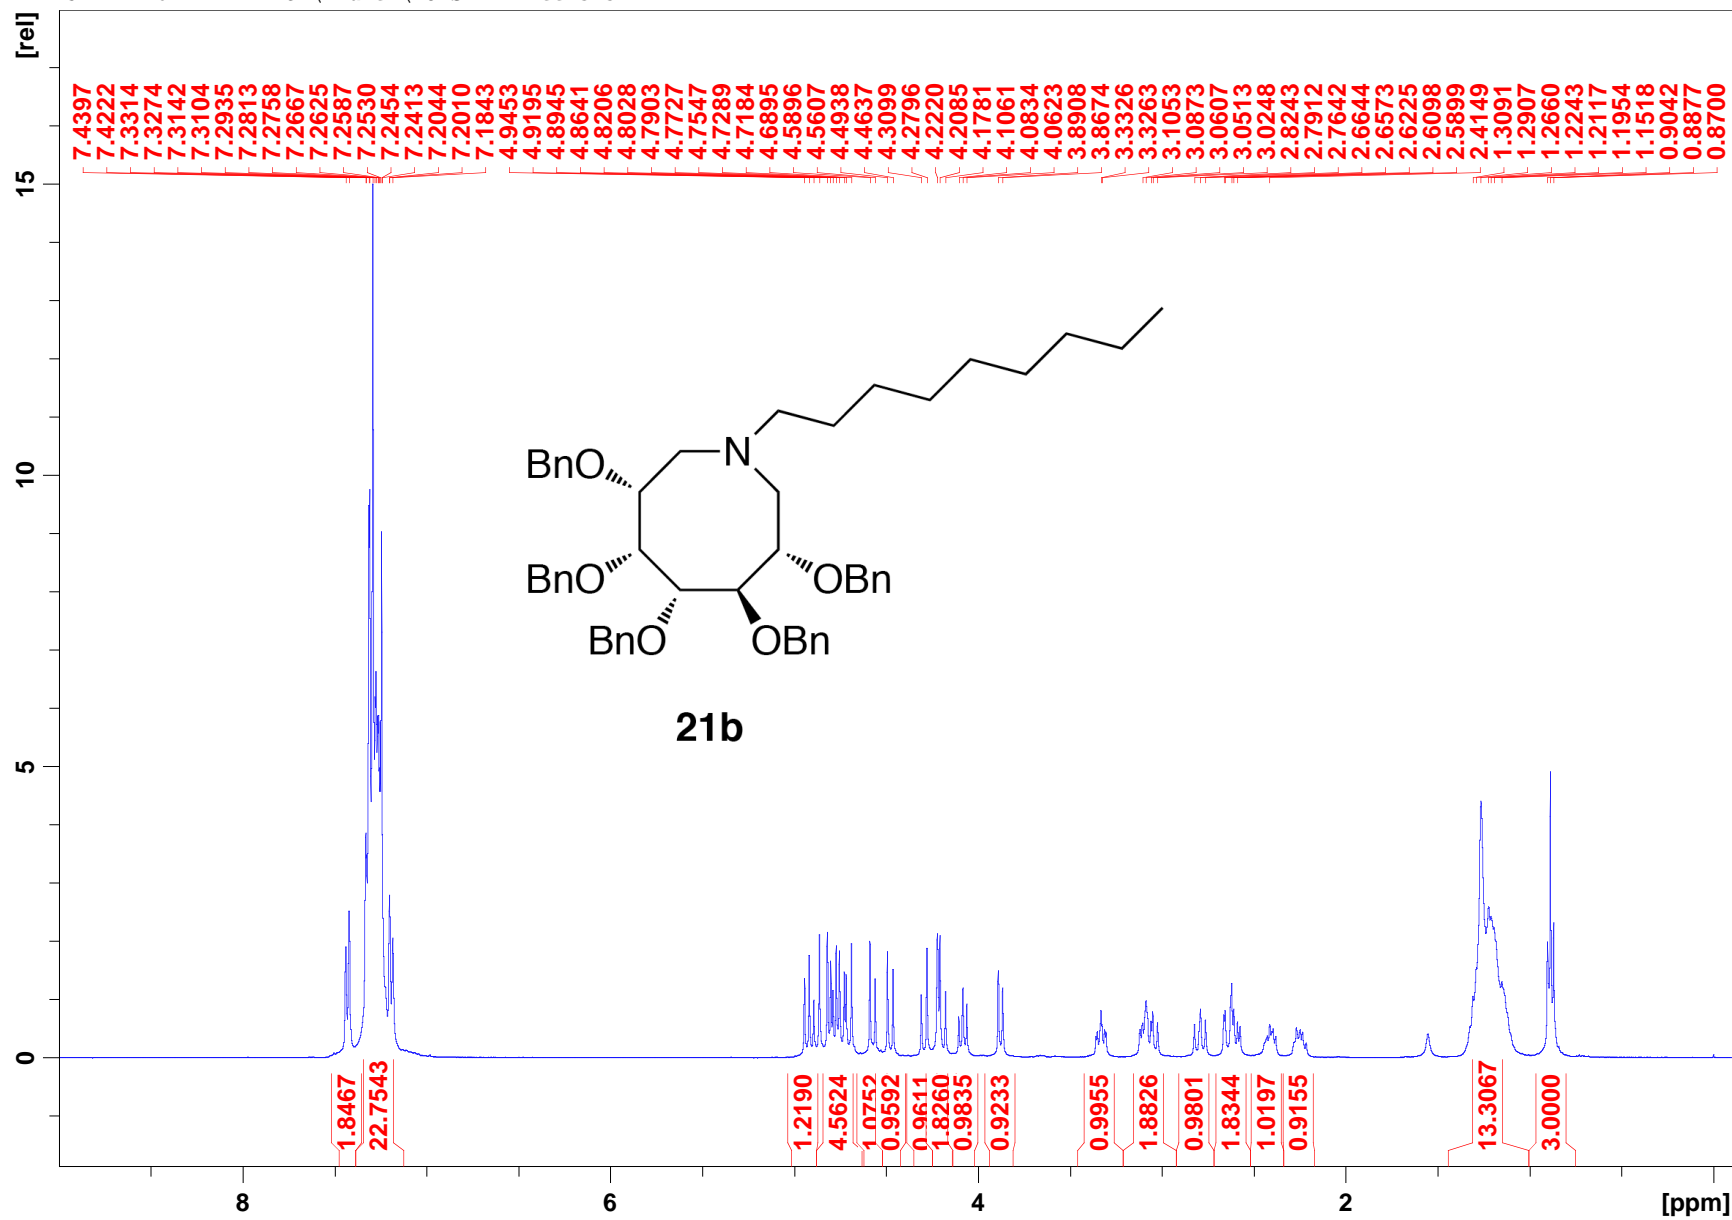

# 13C-NMR

JL-112207 3 1 C:\Bruker\TOPSPIN leex3451

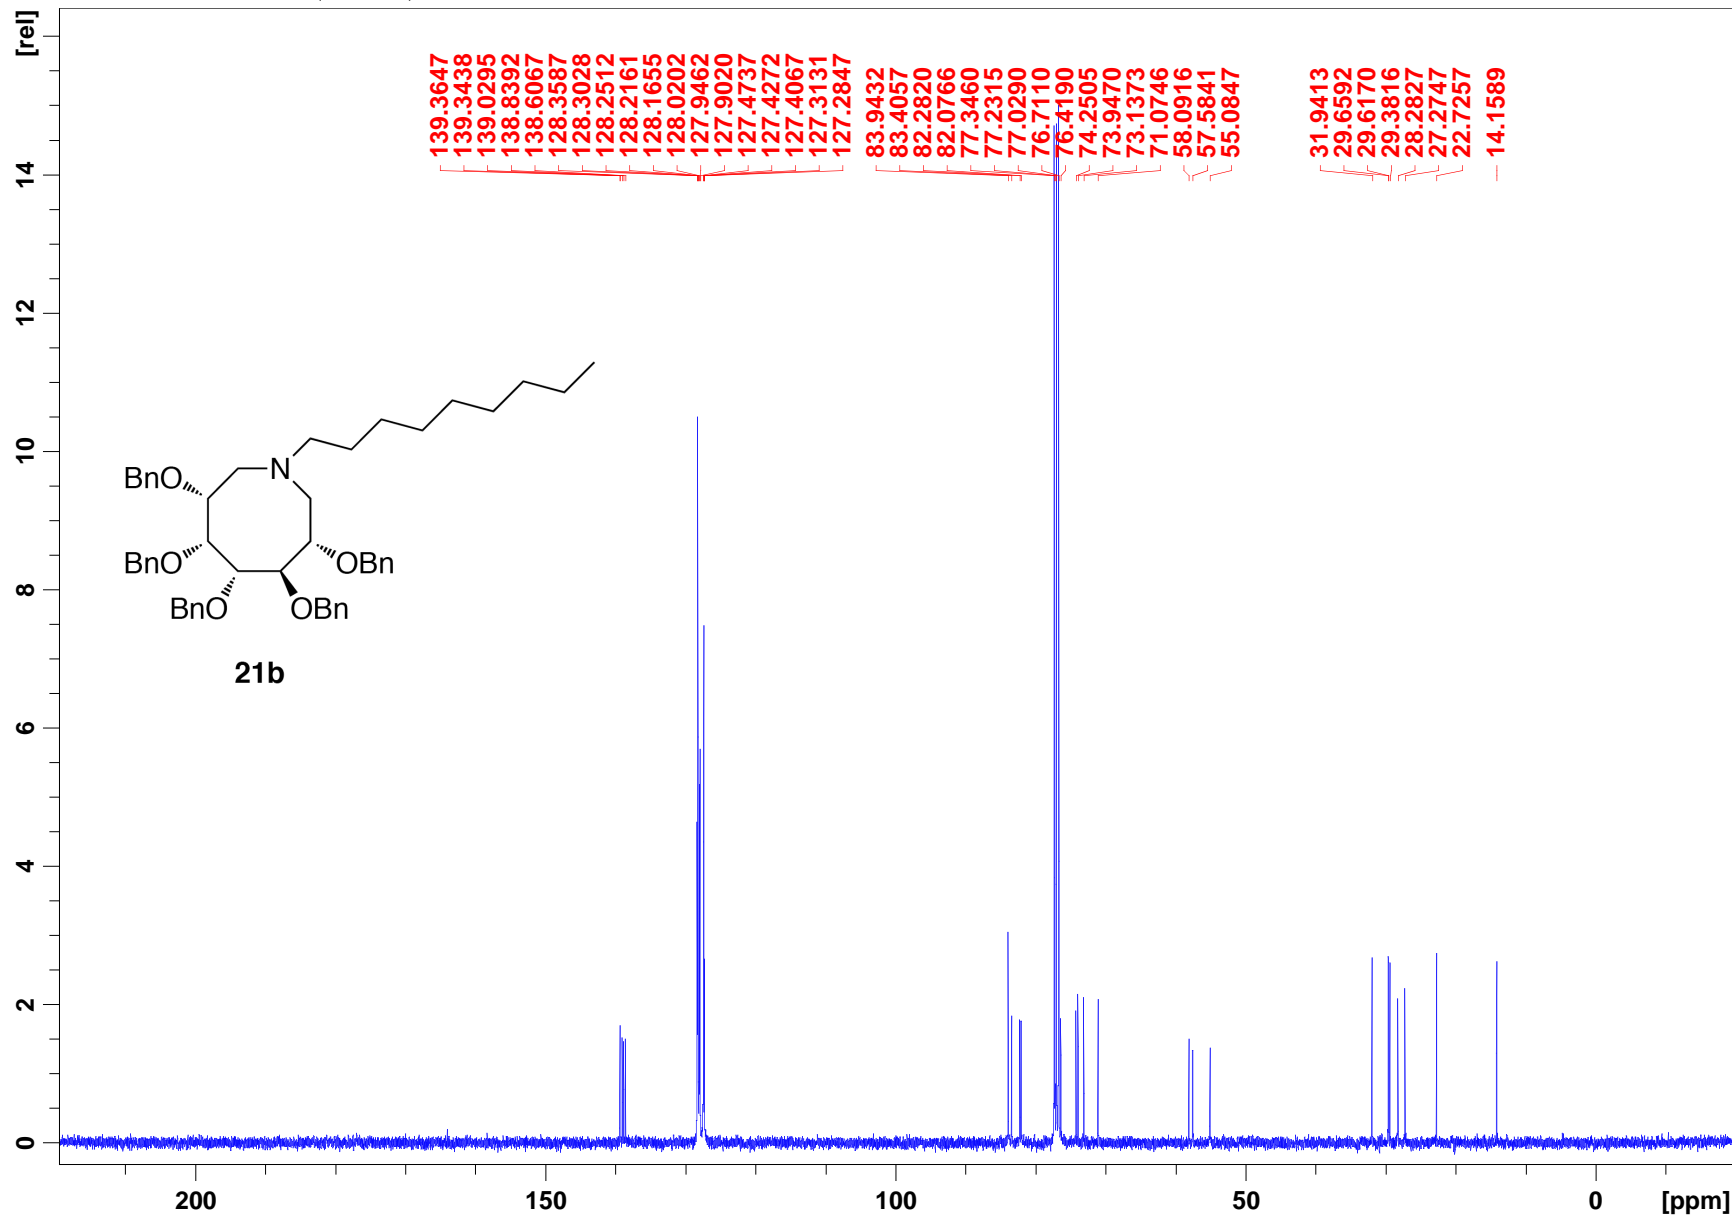

# 1H-NMR

JL-022008 1 1 C:\Bruker\TOPSPIN leex3451

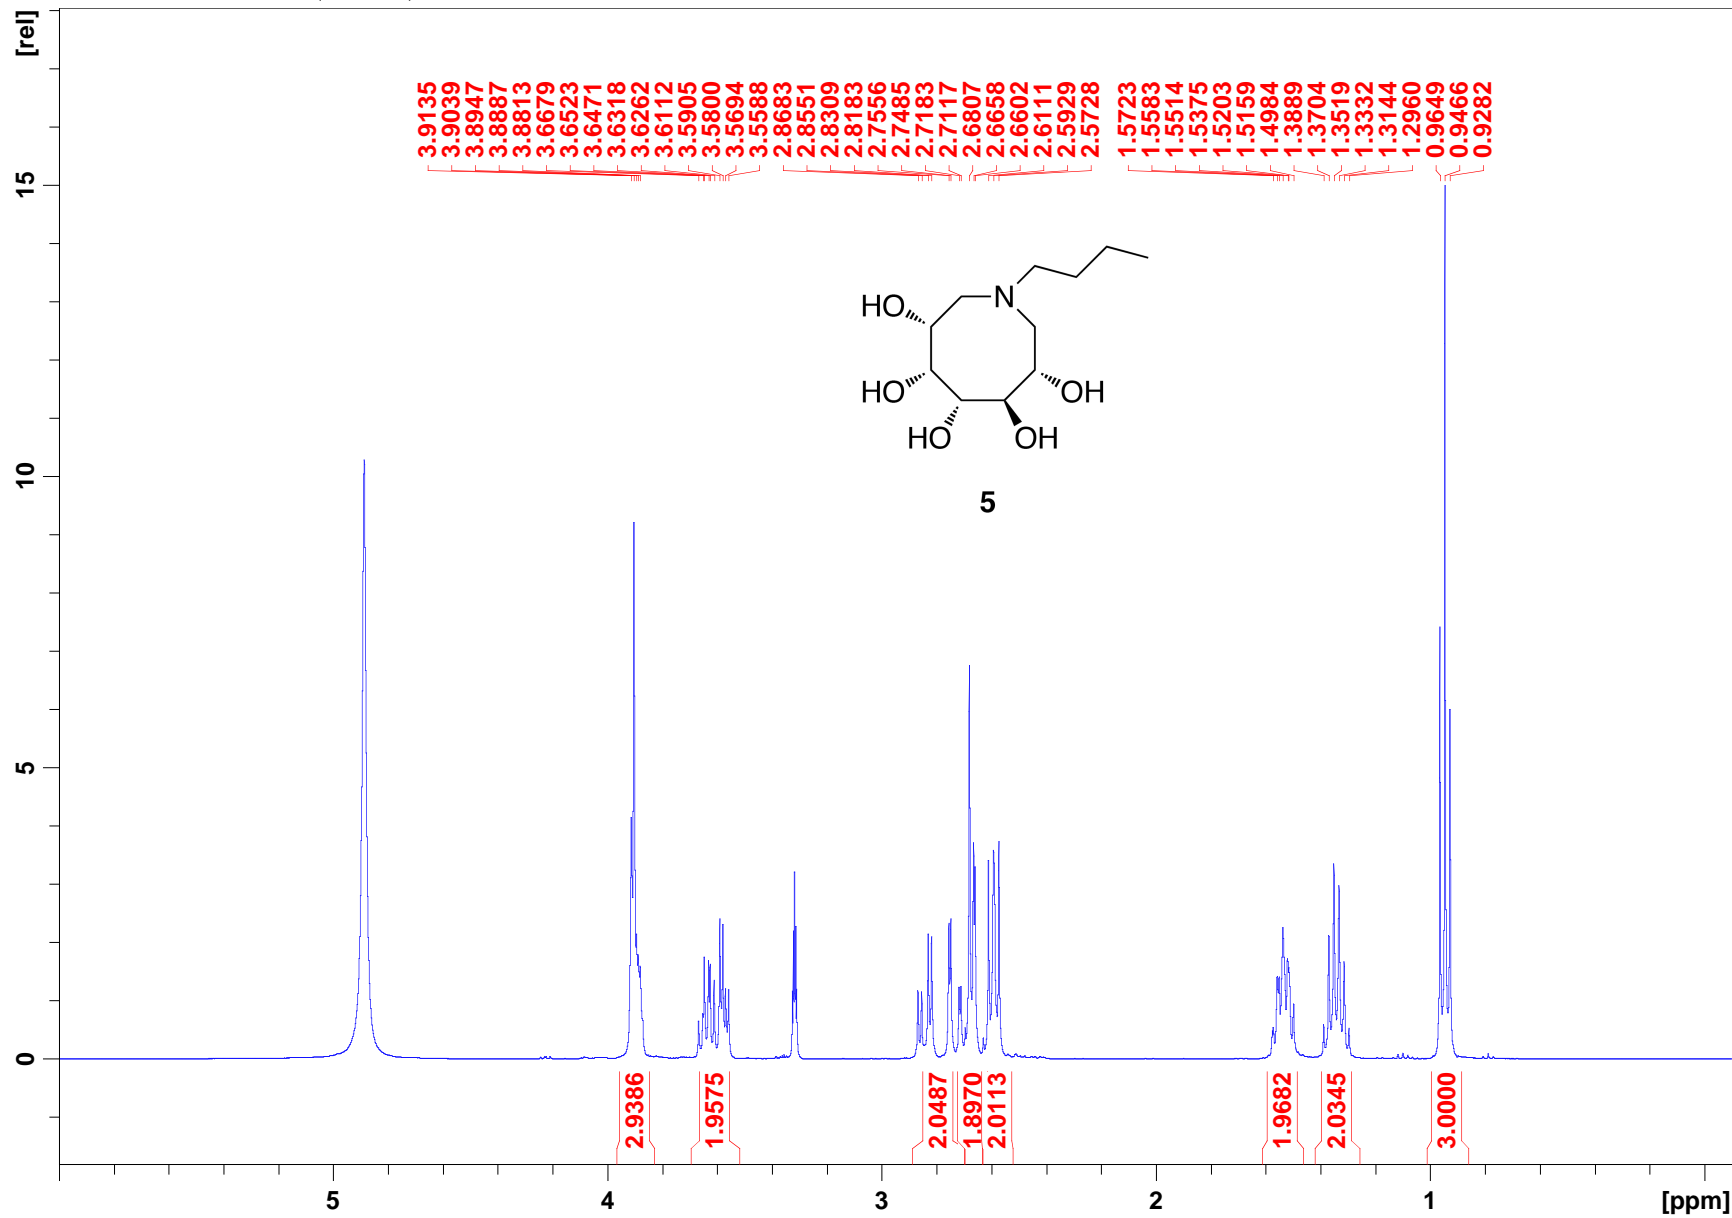

# 13C-NMR

JL-022008 3 1 C:\Bruker\TOPSPIN leex3451

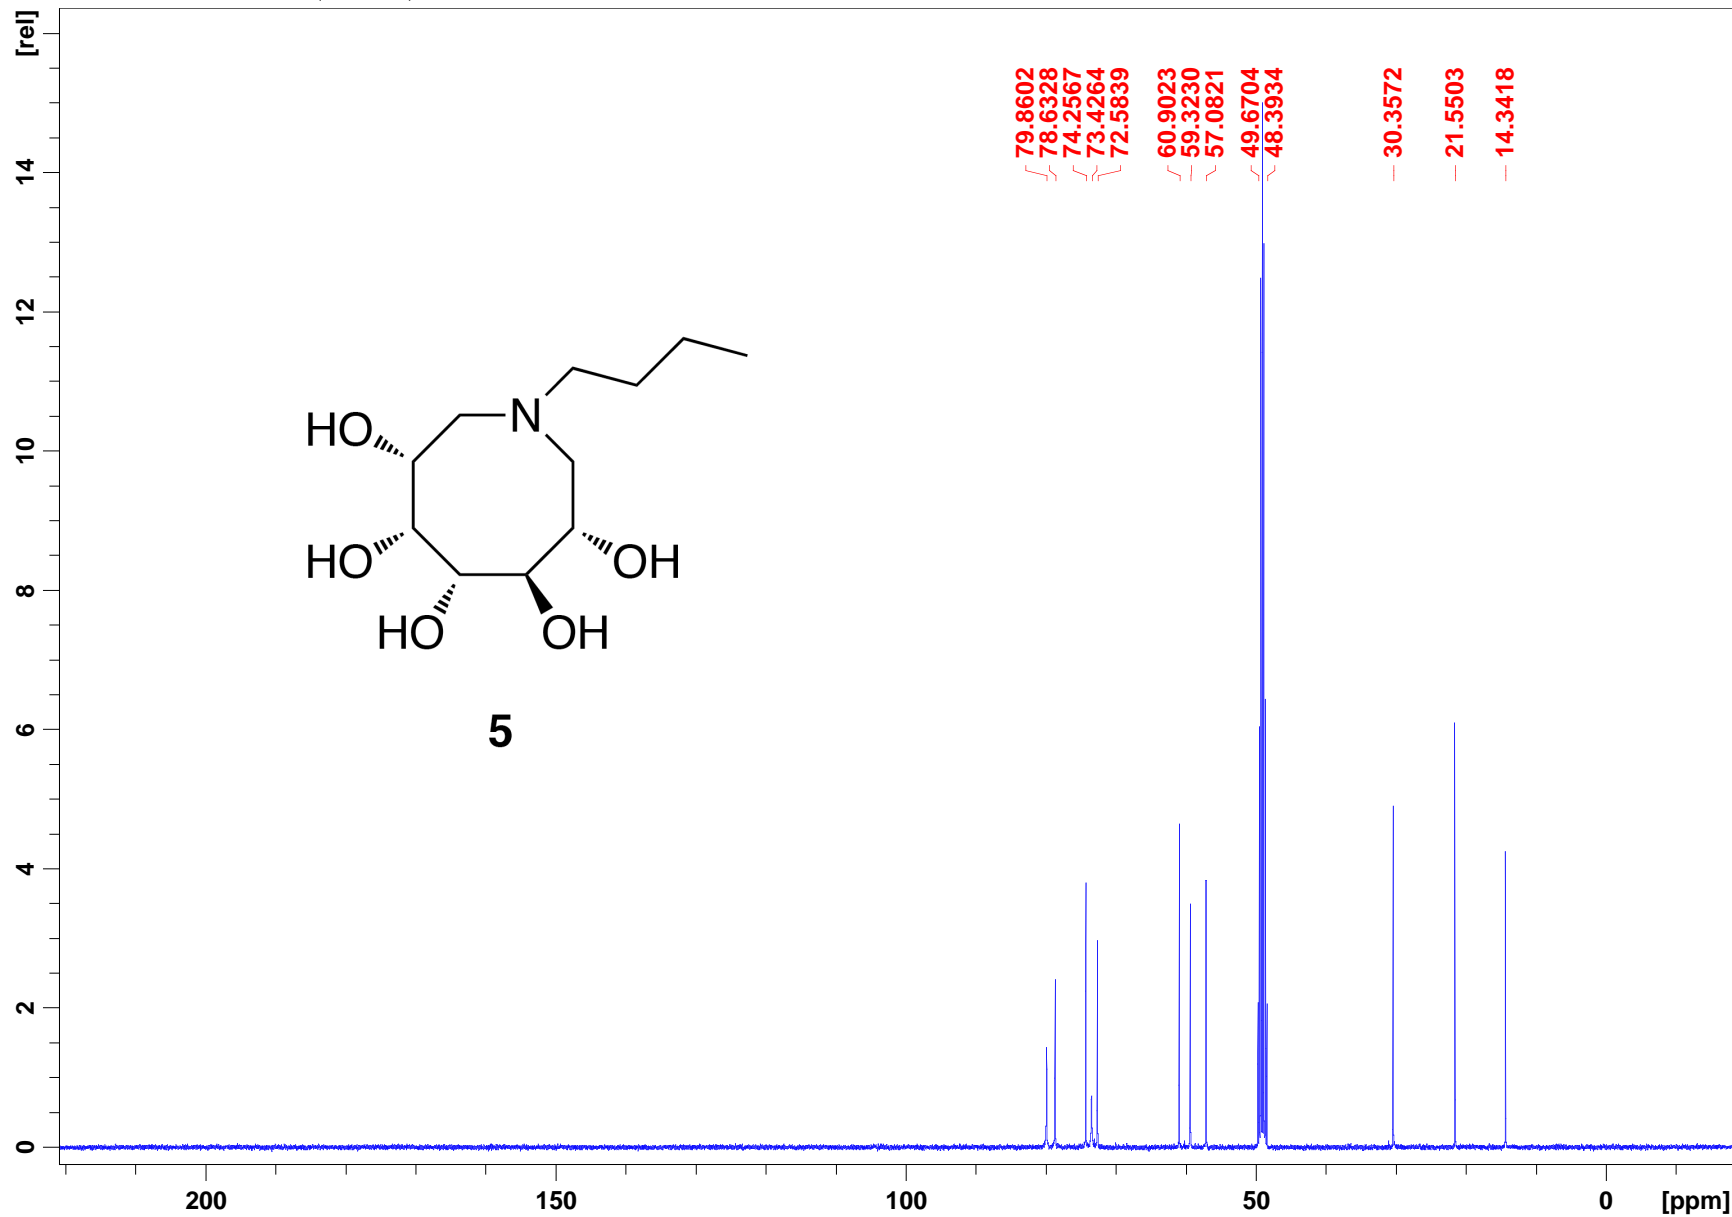

# 1H-NMR

JL-120507 1 1 C:\Bruker\TOPSPIN leex3451

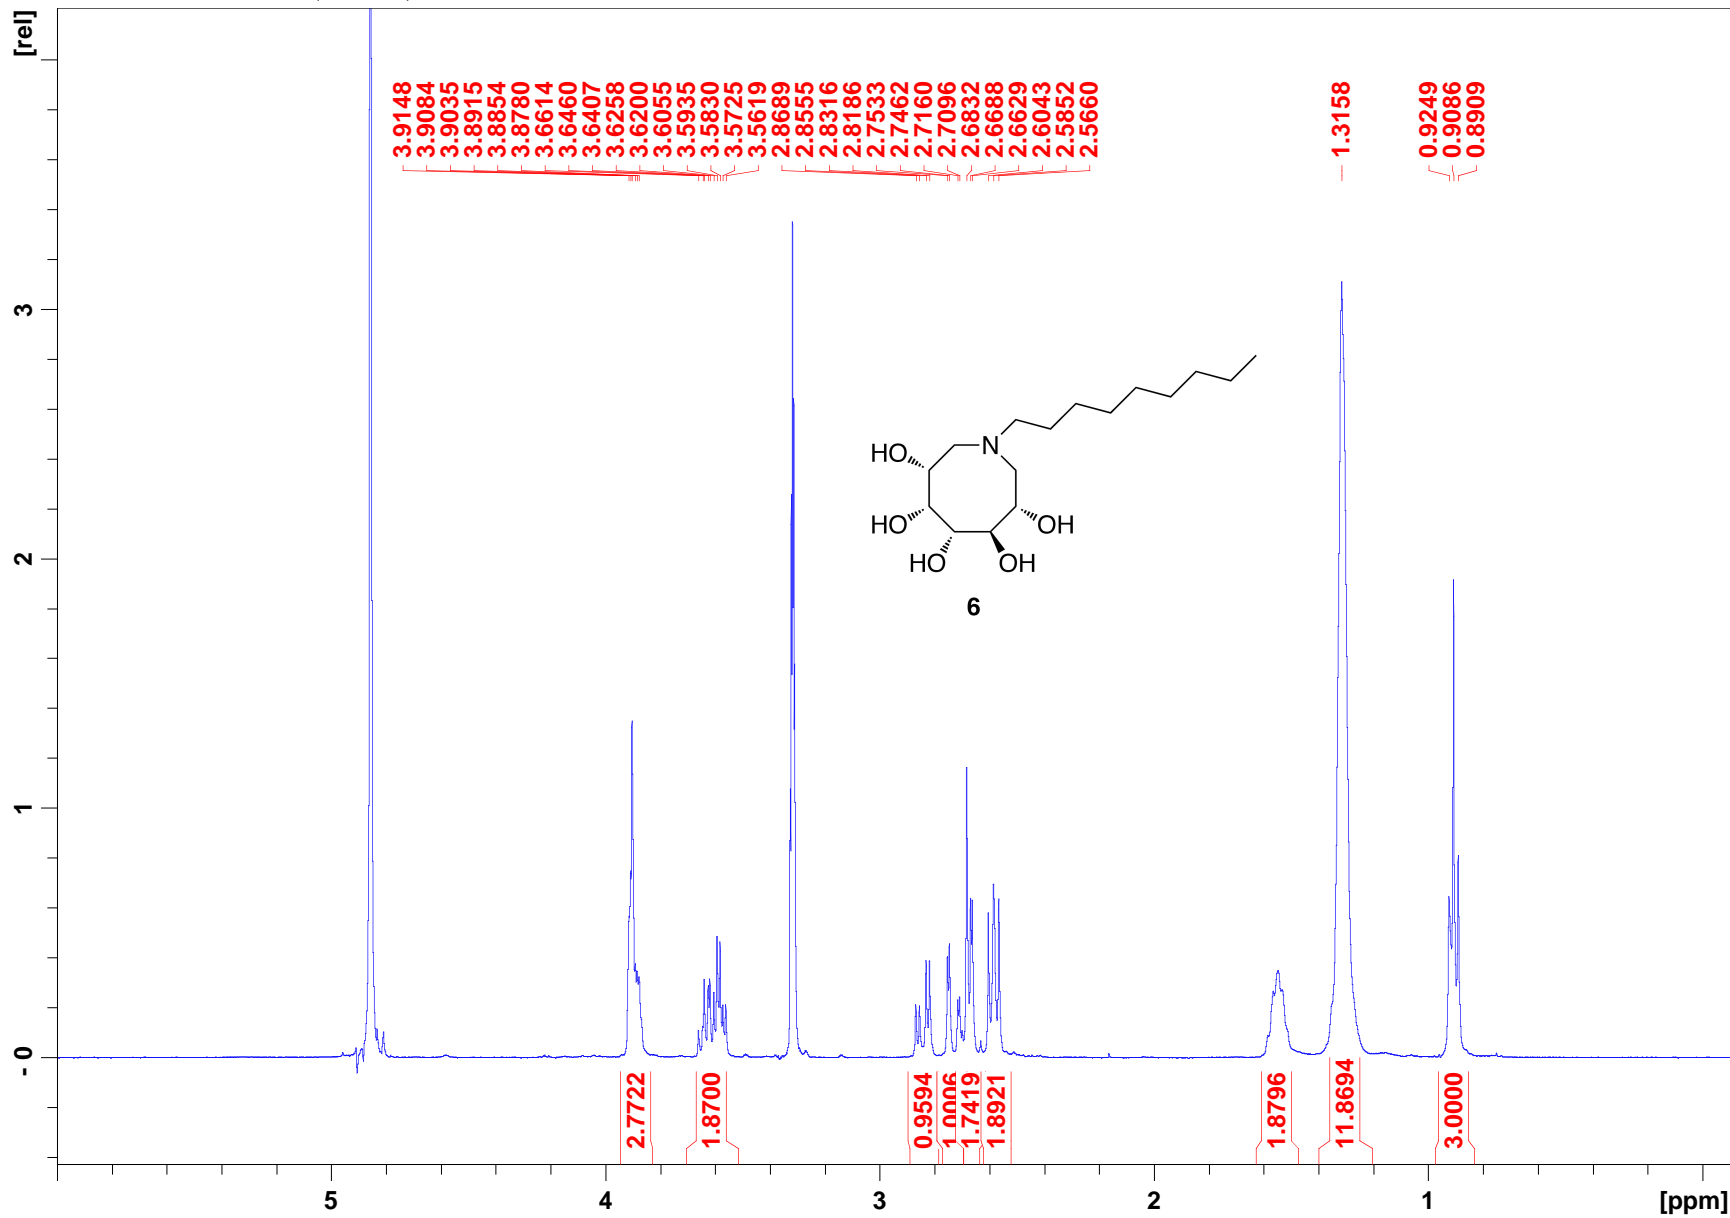



# 13C-NMR

JL-030308 3 1 C:\Bruker\TOPSPIN leex3451

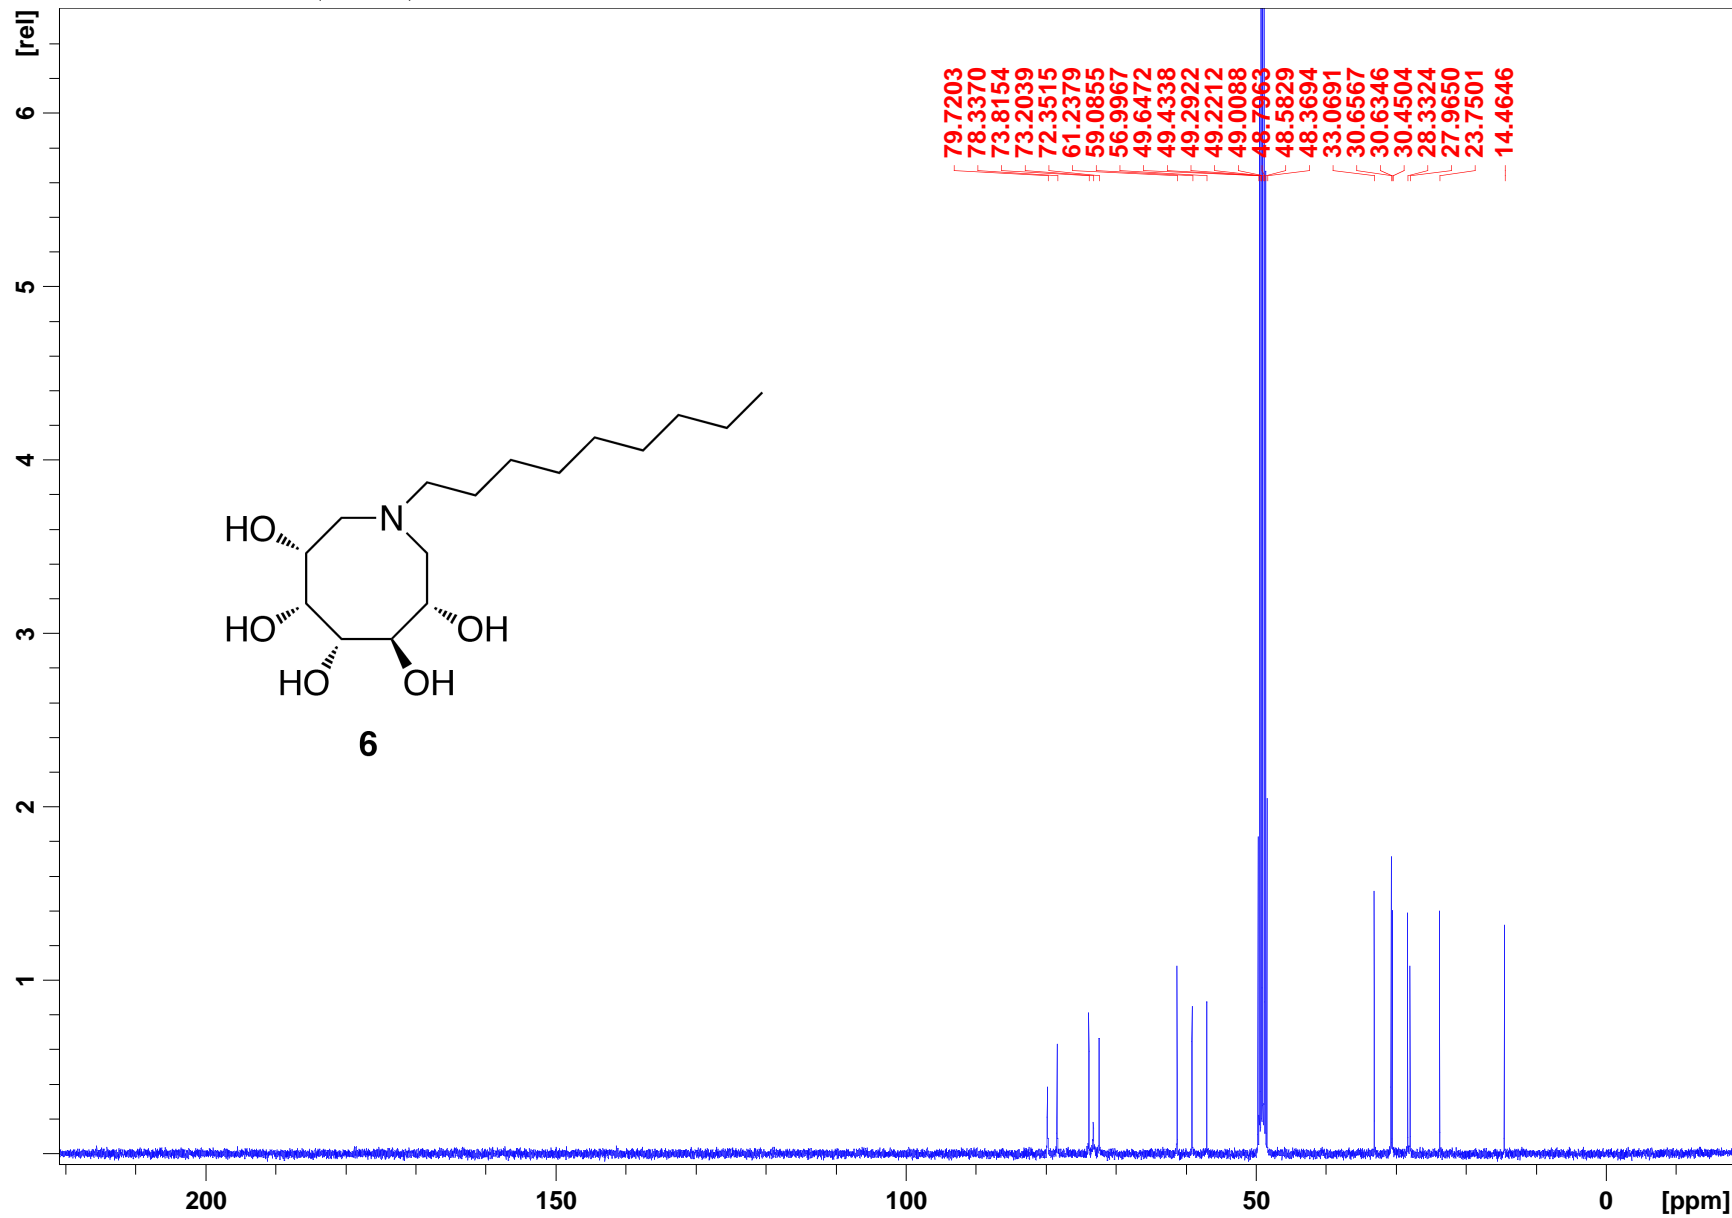

# 1H-NMR

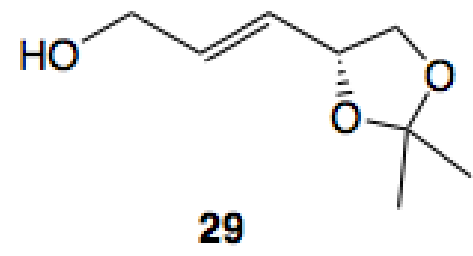

5.94  
5.93  
5.92  
5.90  
5.88  
5.88  
5.71  
5.71  
5.70  
5.69  
5.68  
5.67  
5.66  
5.65  
5.65  
4.55  
4.53  
4.51  
4.50  
4.10  
4.09  
4.08  
4.08  
4.07  
4.06  
3.57  
3.55

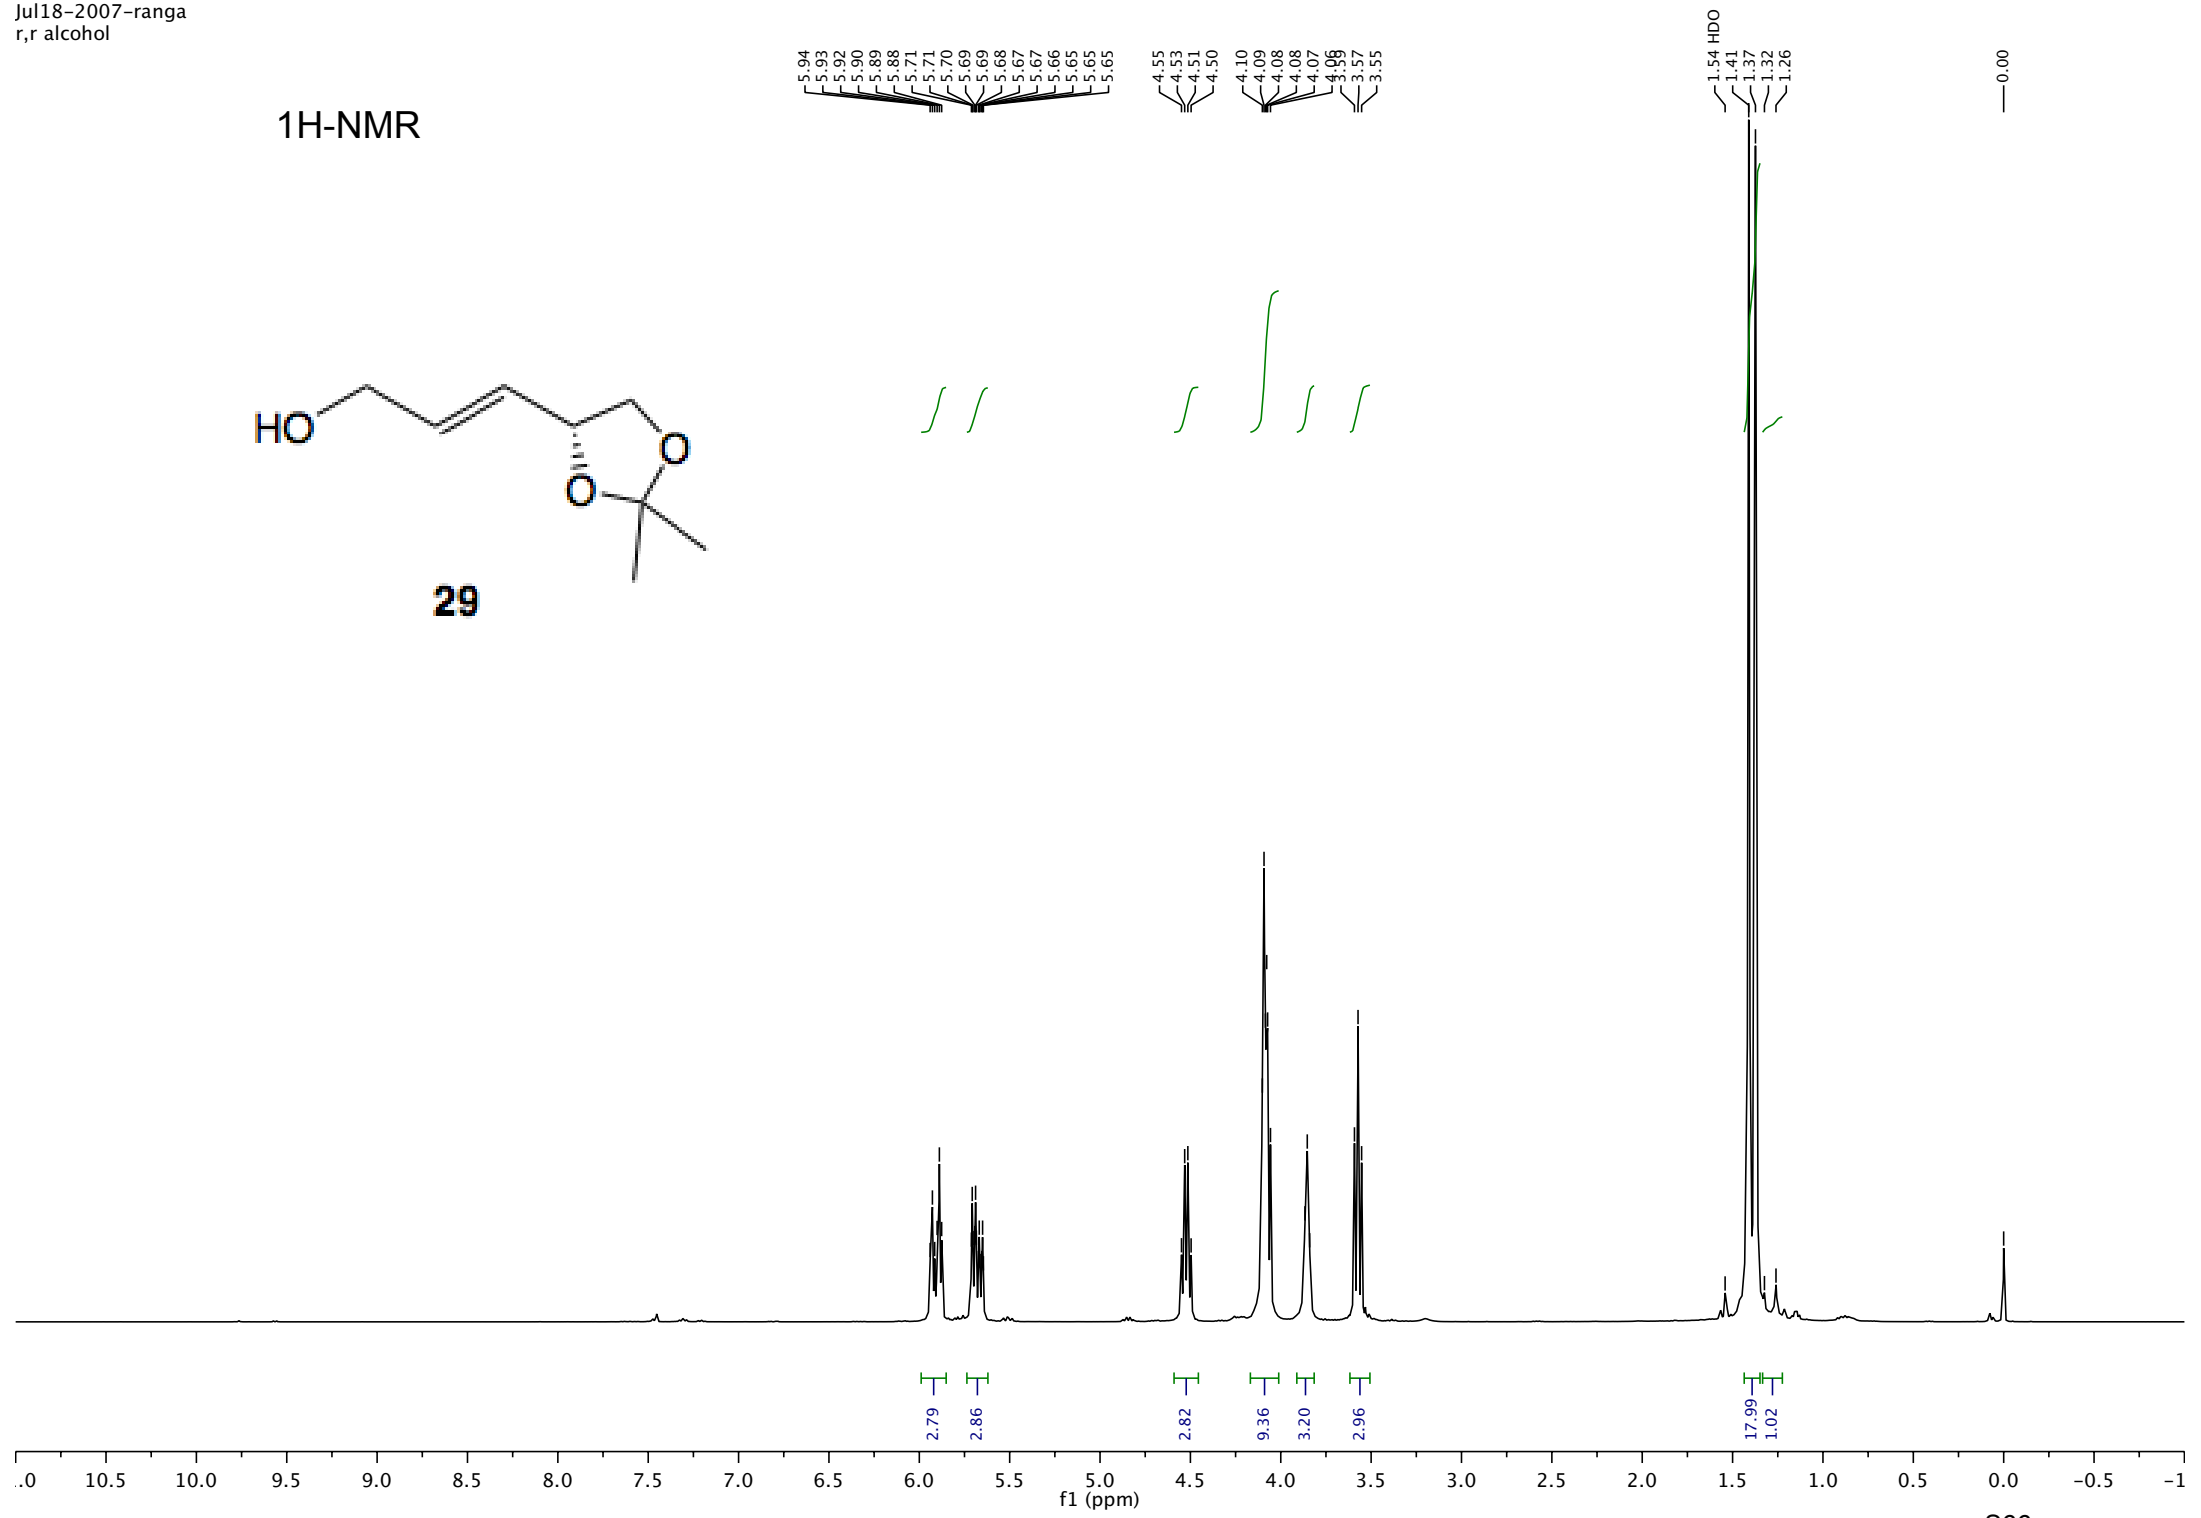

2.79

2.86

2.82

9.36

3.20

2.96

17.99

1.02

# 13C-NMR

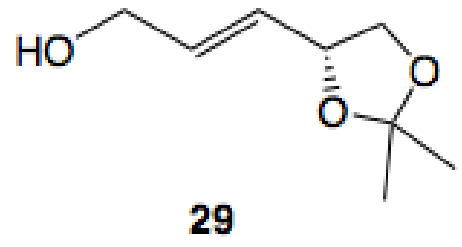

133.71  
133.41  
128.88  
127.81

109.30  
109.25

77.78  
77.46  
77.14  
76.52 CDCl3  
71.87  
69.36  
69.26

61.92  
58.03

26.63  
25.87  
25.83

-0.00

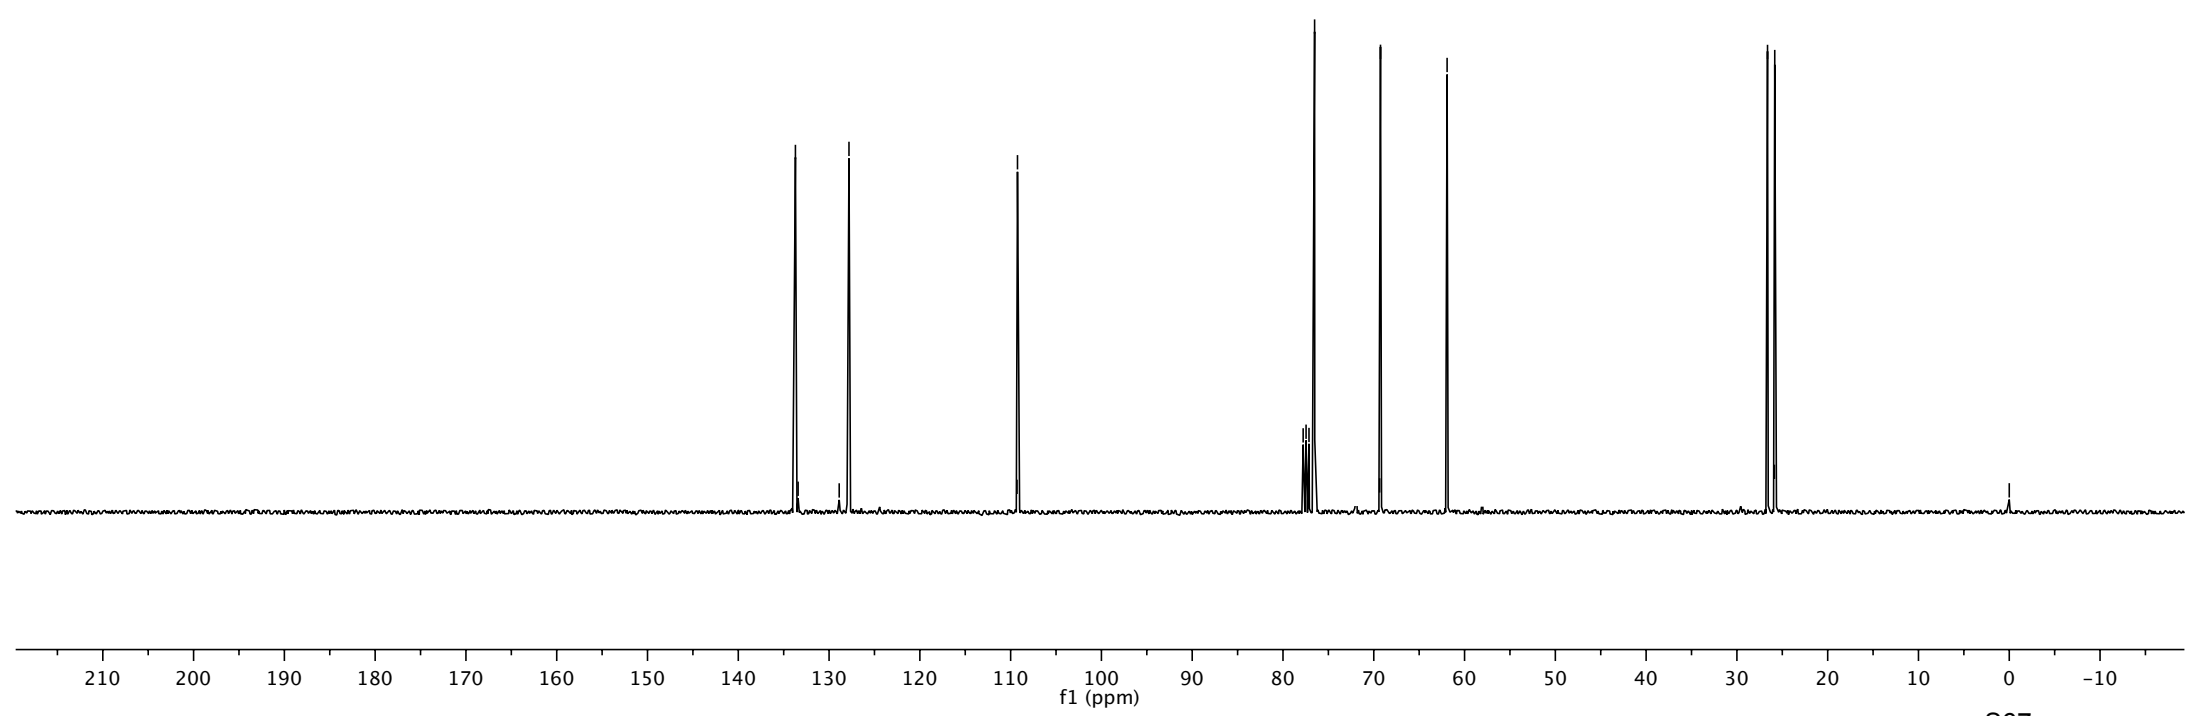

# 1H-NMR

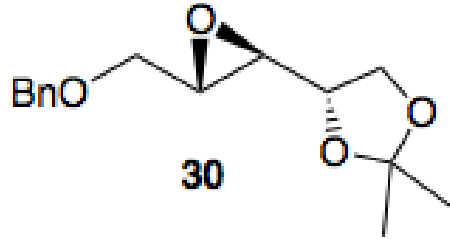

7.33  
7.31  
7.30 CDCl3  
7.28  
7.27  
7.26  
7.25  
7.23  
7.22

4.57  
4.54  
4.52  
4.49  
4.04  
3.89  
3.88  
3.86  
3.84  
3.45  
3.43  
3.42  
3.08  
3.07  
3.06  
2.95  
2.94  
2.93  
2.93

— 1.99  
1.53 H2O  
1.42  
1.33  
1.26  
1.23  
1.21  
0.90  
0.88  
0.85

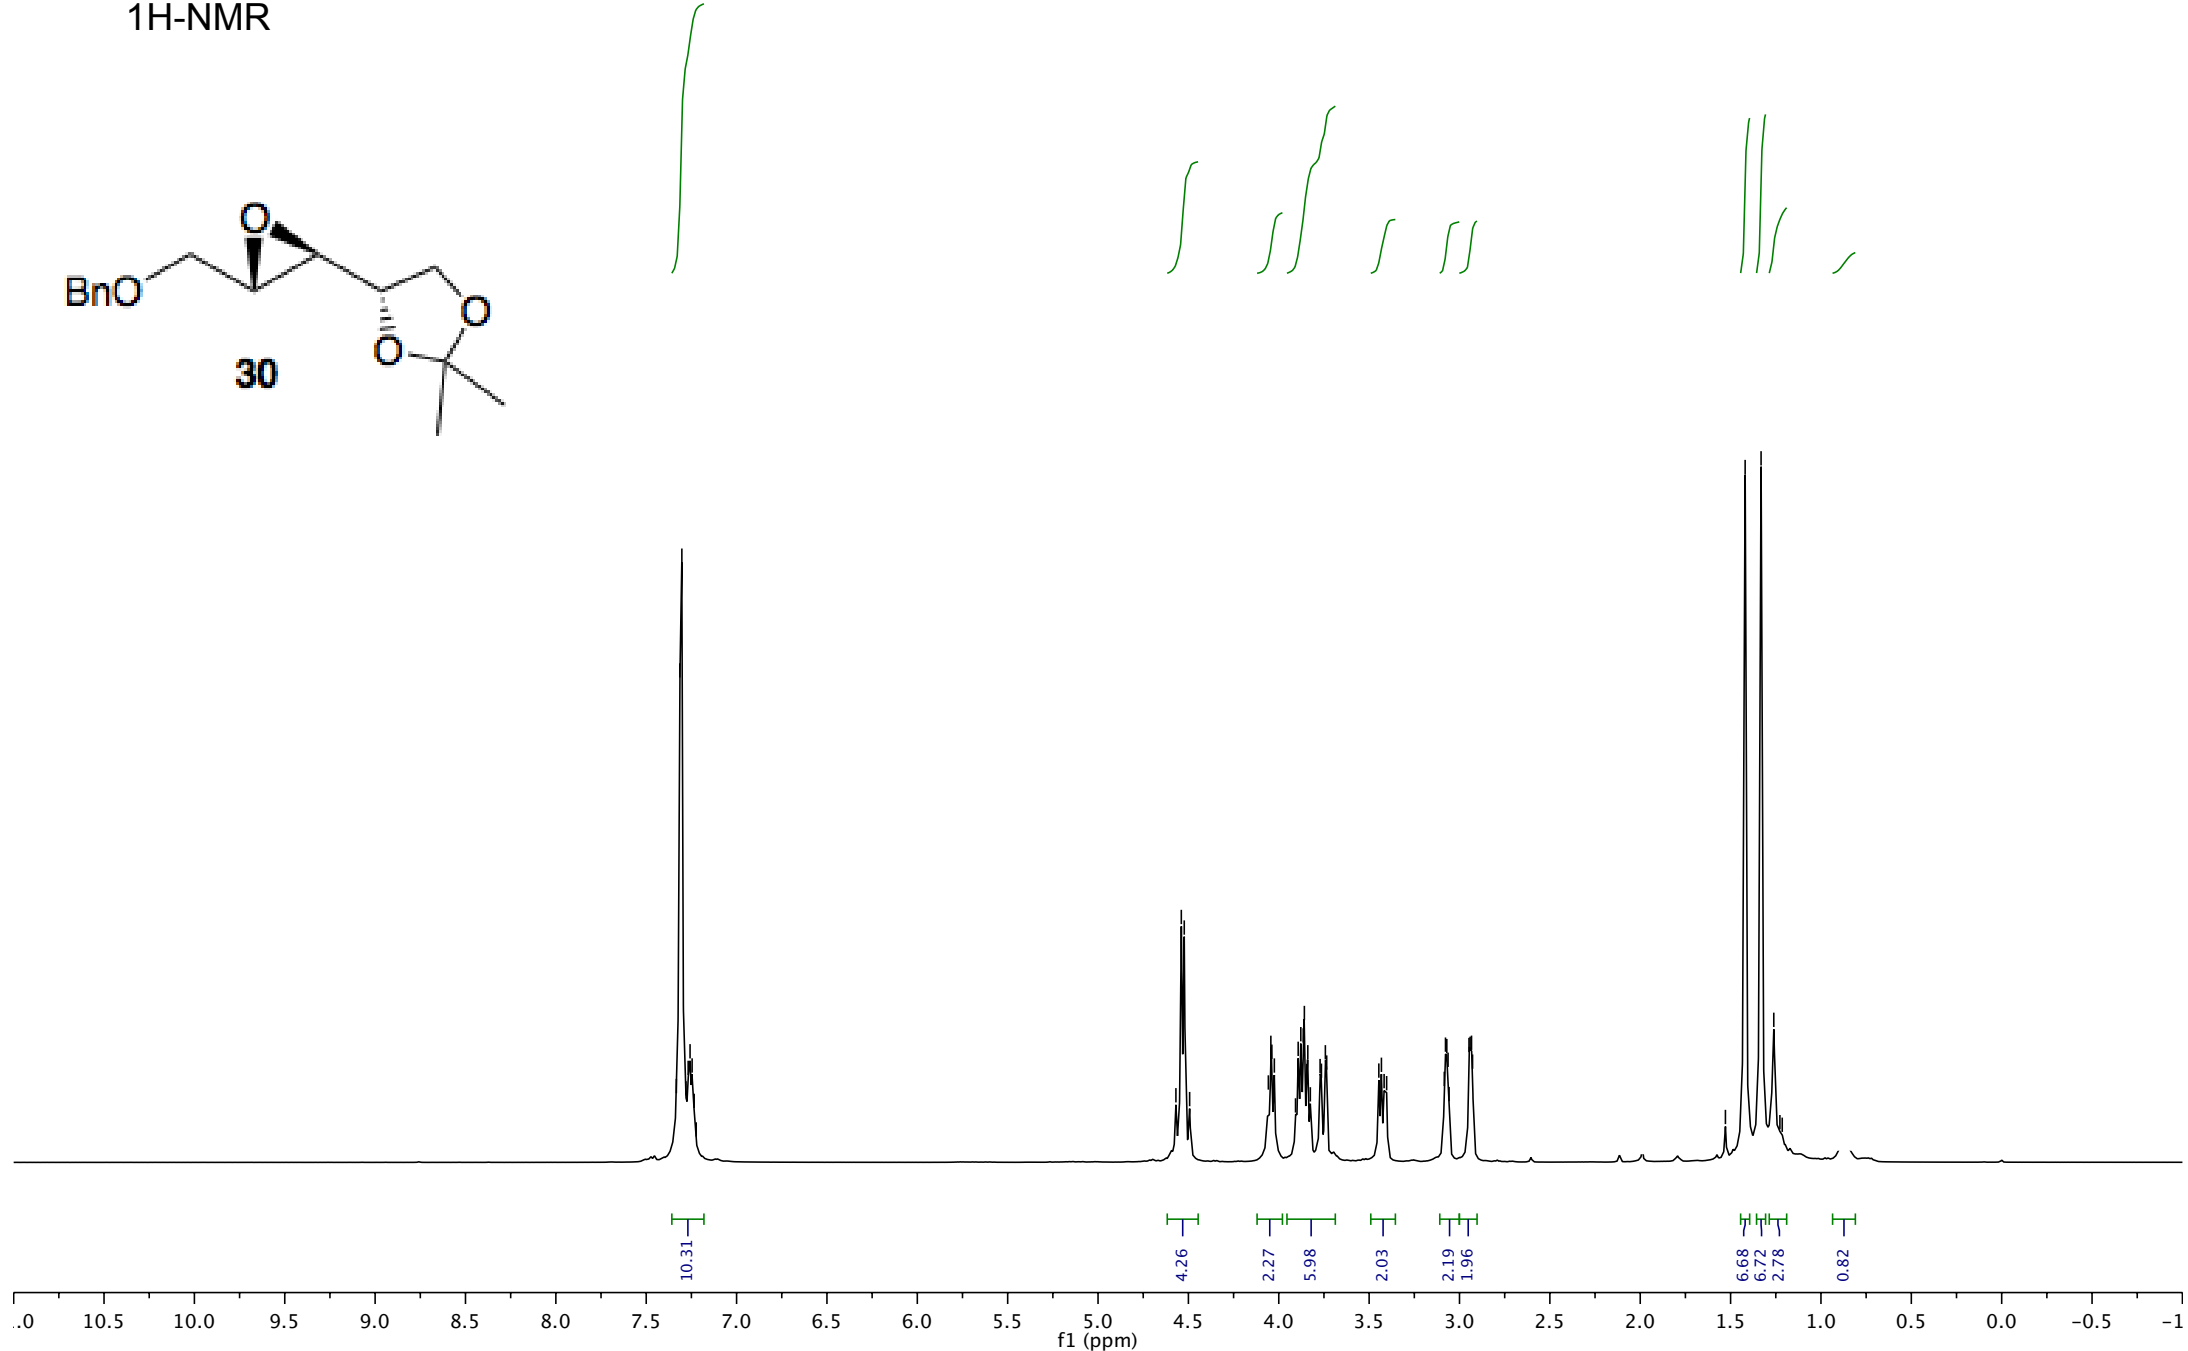

# 13C-NMR

137.86  
128.38  
128.18  
128.07  
127.71  
127.68  
124.43

109.68

77.65  
77.33  
77.01 CDCl3  
75.49  
73.11  
69.43  
66.67

55.76  
55.19

31.74  
29.69  
26.51  
25.28

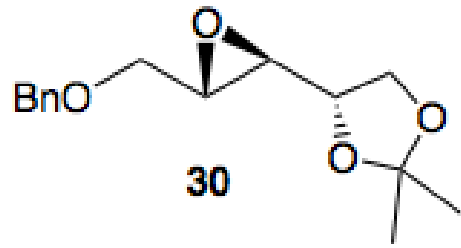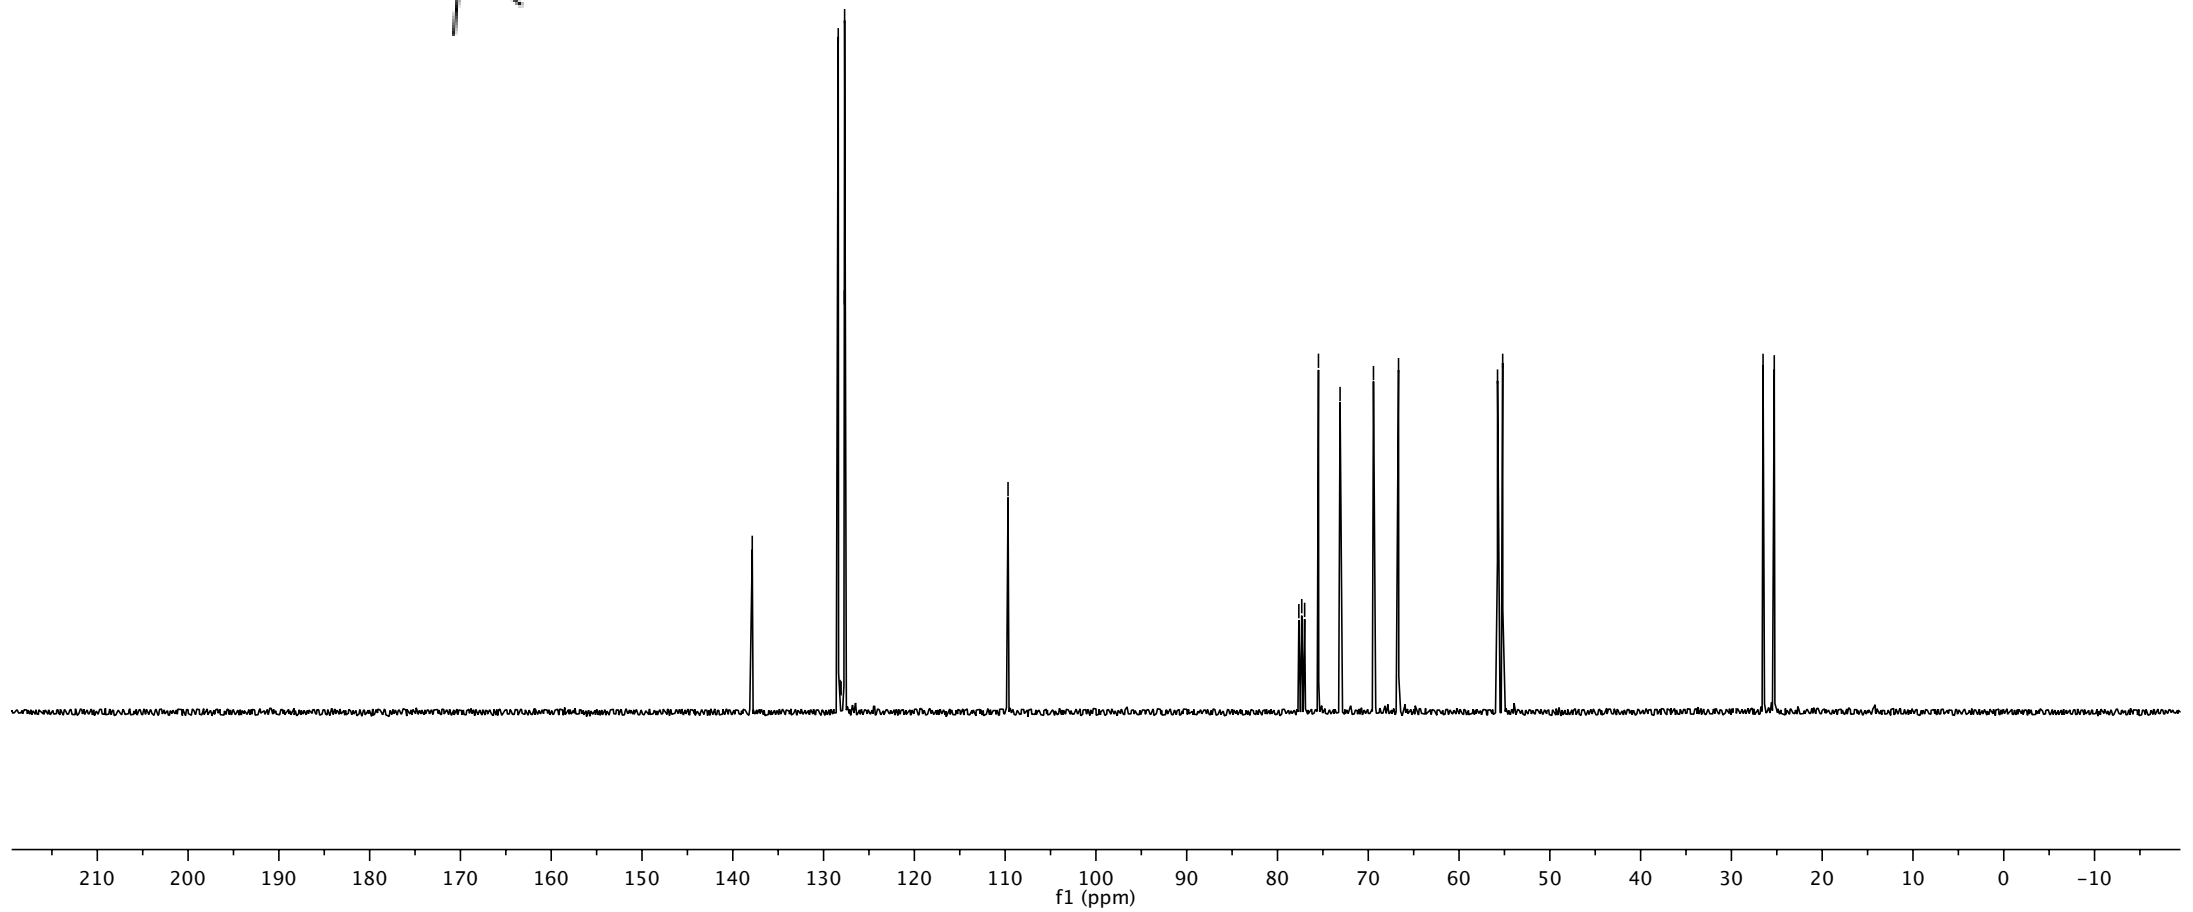

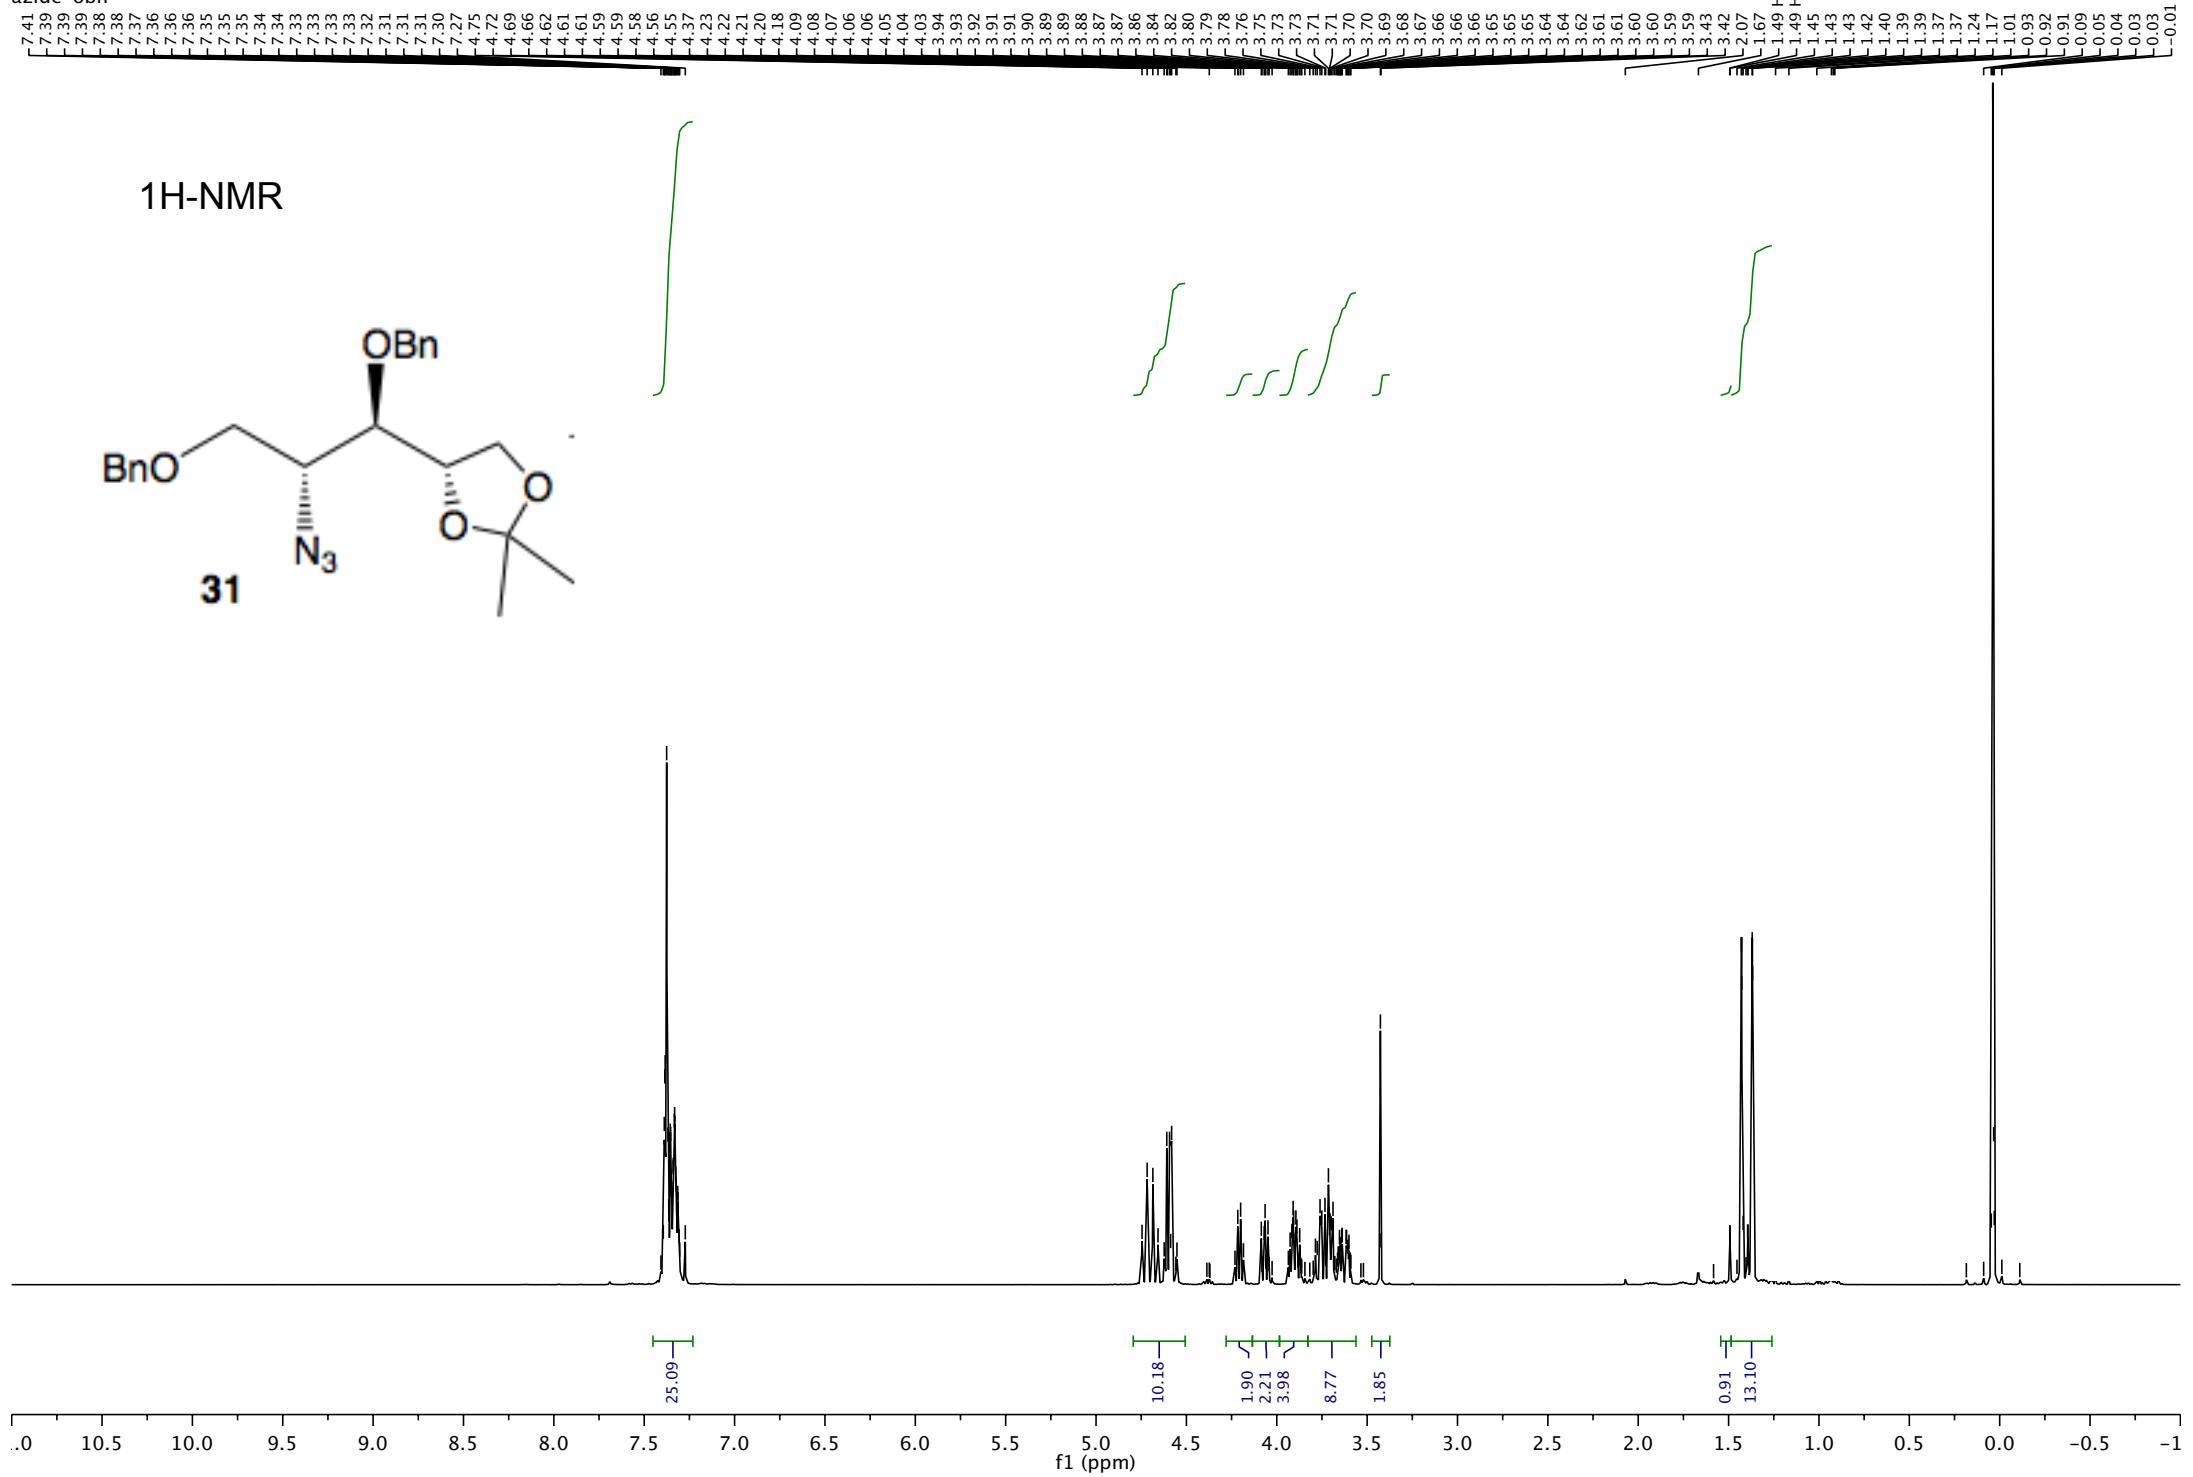

# 13C-NMR

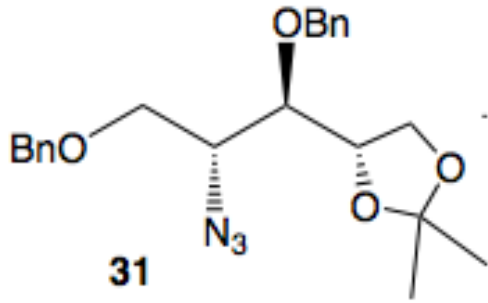

137.72  
137.65  
128.48  
128.46  
128.38  
128.01  
127.98  
127.97  
127.93  
127.79  
127.75  
127.67  
127.62  
109.33  
109.30

79.08  
77.38 CDCl3  
77.06 CDCl3  
76.75 CDCl3  
75.87  
75.23  
73.97  
73.50  
73.41  
73.34  
72.68  
72.01  
69.60  
69.30  
66.47  
62.50  
59.09

36.65

26.59  
26.25  
25.26

0.03

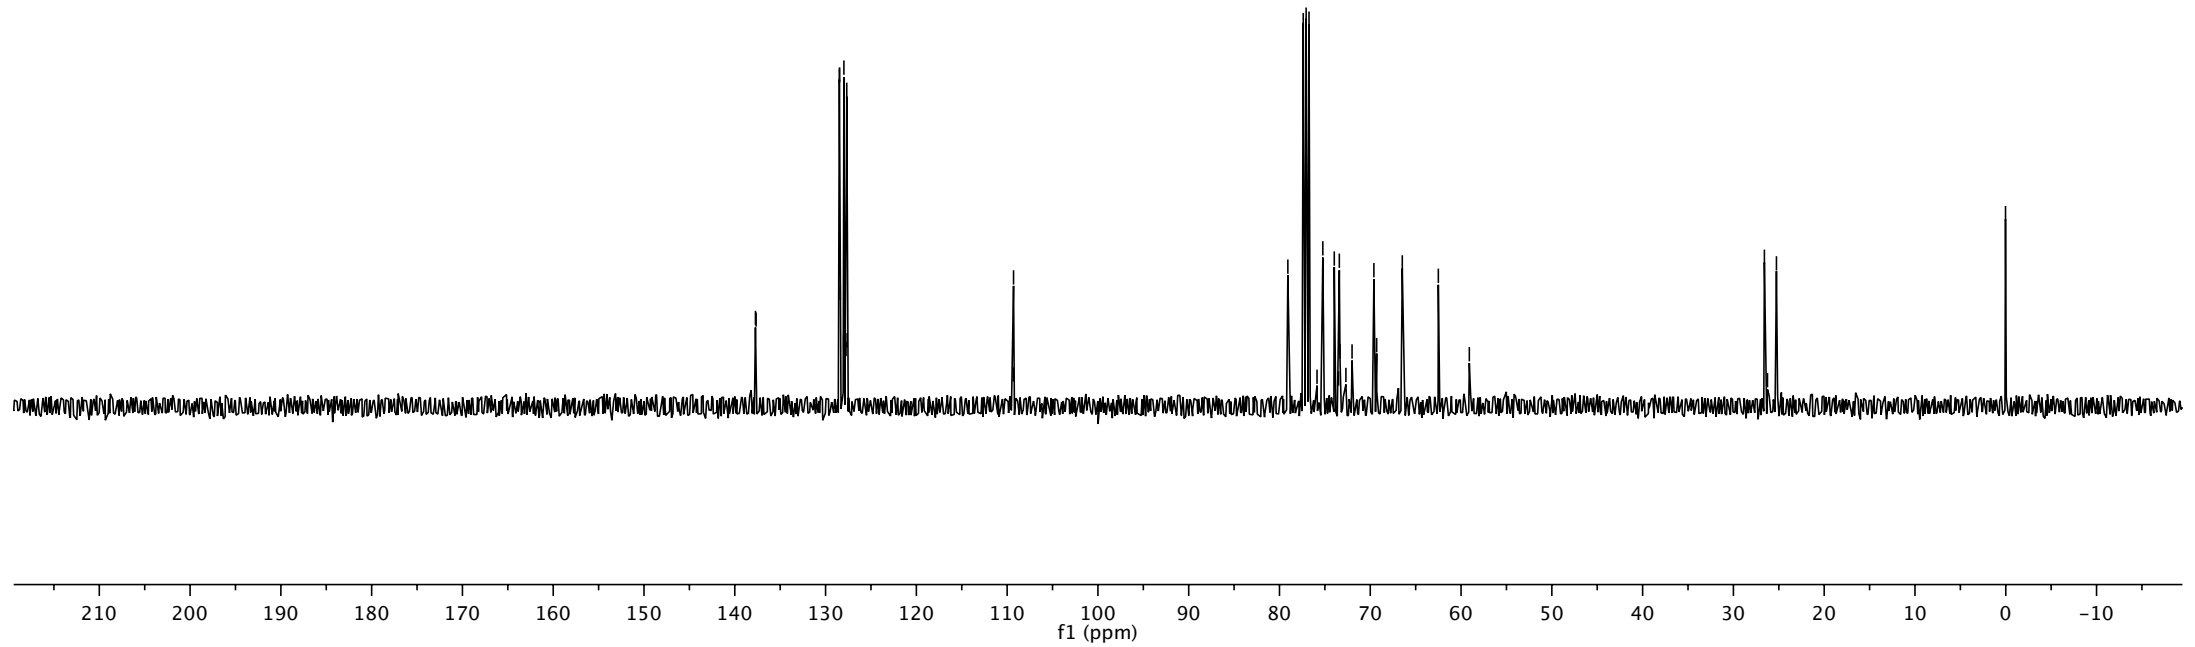

# 1H-NMR

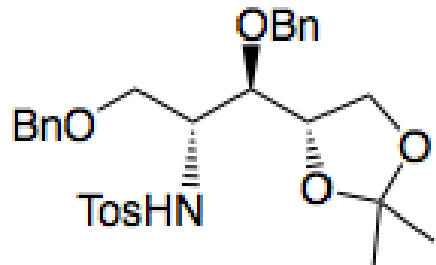

**32**

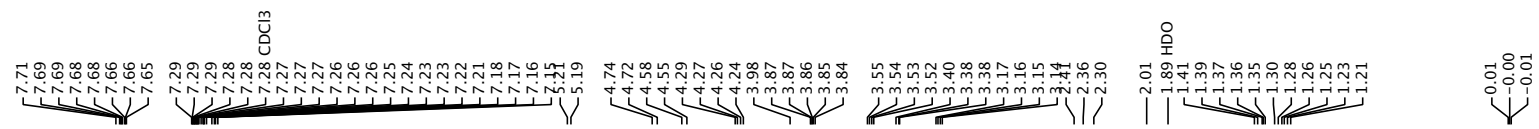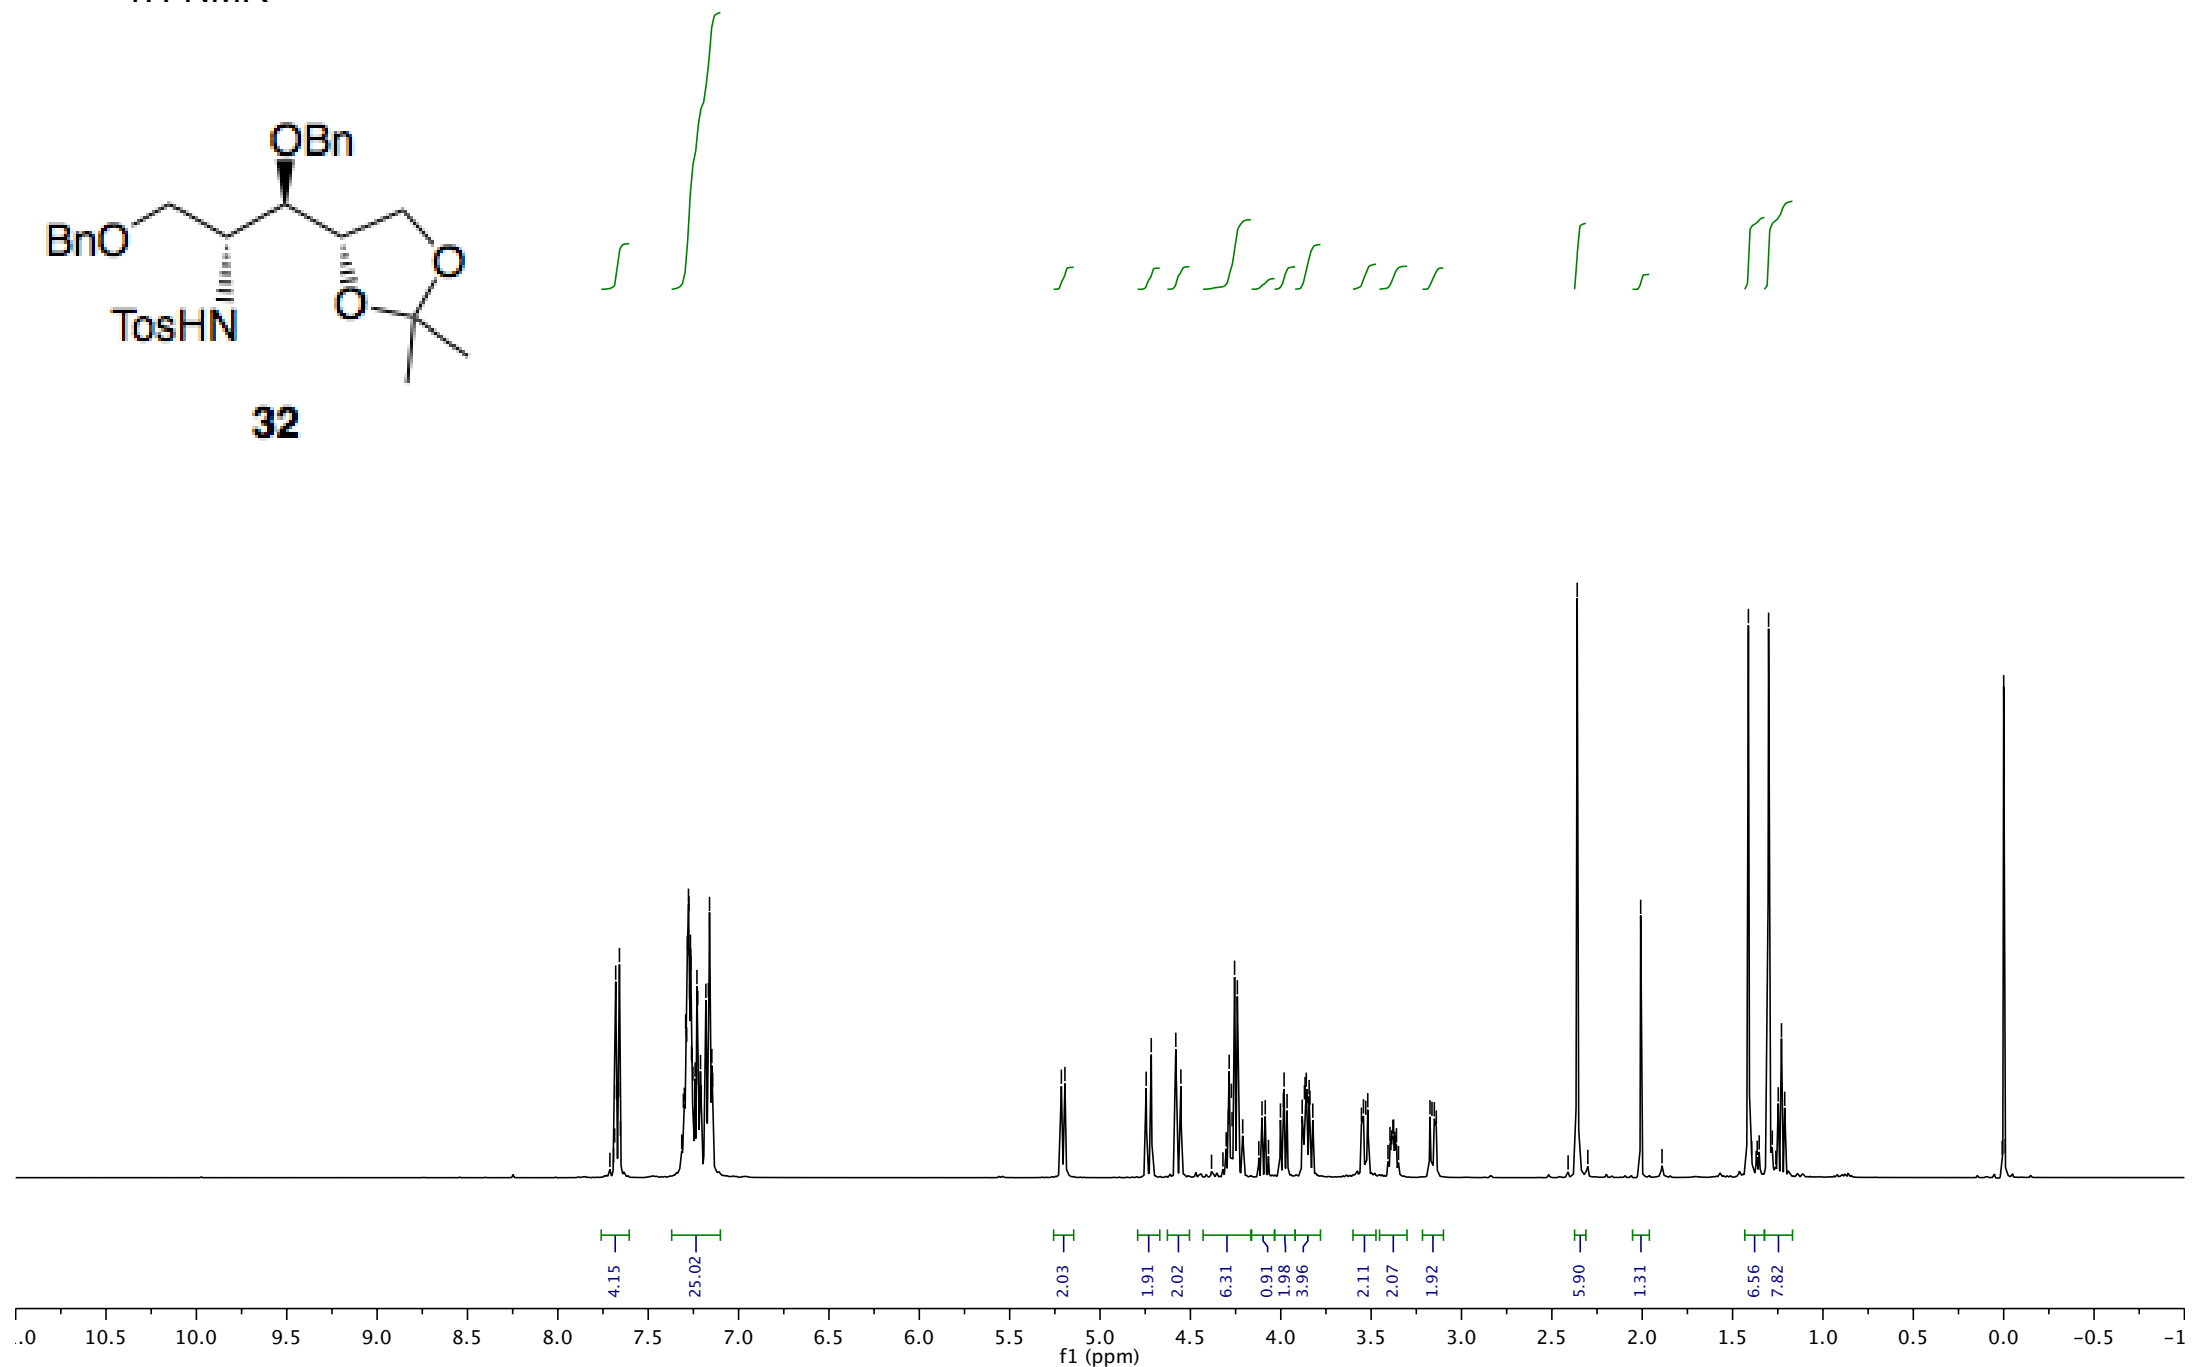



# 13C-NMR

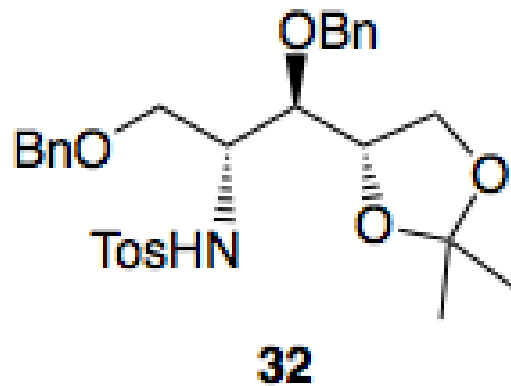

—171.04

—143.38  
—138.35  
—138.07  
—137.49  
—137.23  
—129.57  
—129.45  
—128.34  
—128.32  
—128.29  
—127.86  
—127.83  
—127.76  
—127.70  
—127.68  
—127.13  
—108.99

78.09  
77.46  
77.14 CDCl3  
76.82  
75.93  
74.65  
72.96  
67.35  
65.47  
60.32  
54.58

—36.62

—26.41  
—24.95  
—21.47  
—20.98

—14.17

—0.00

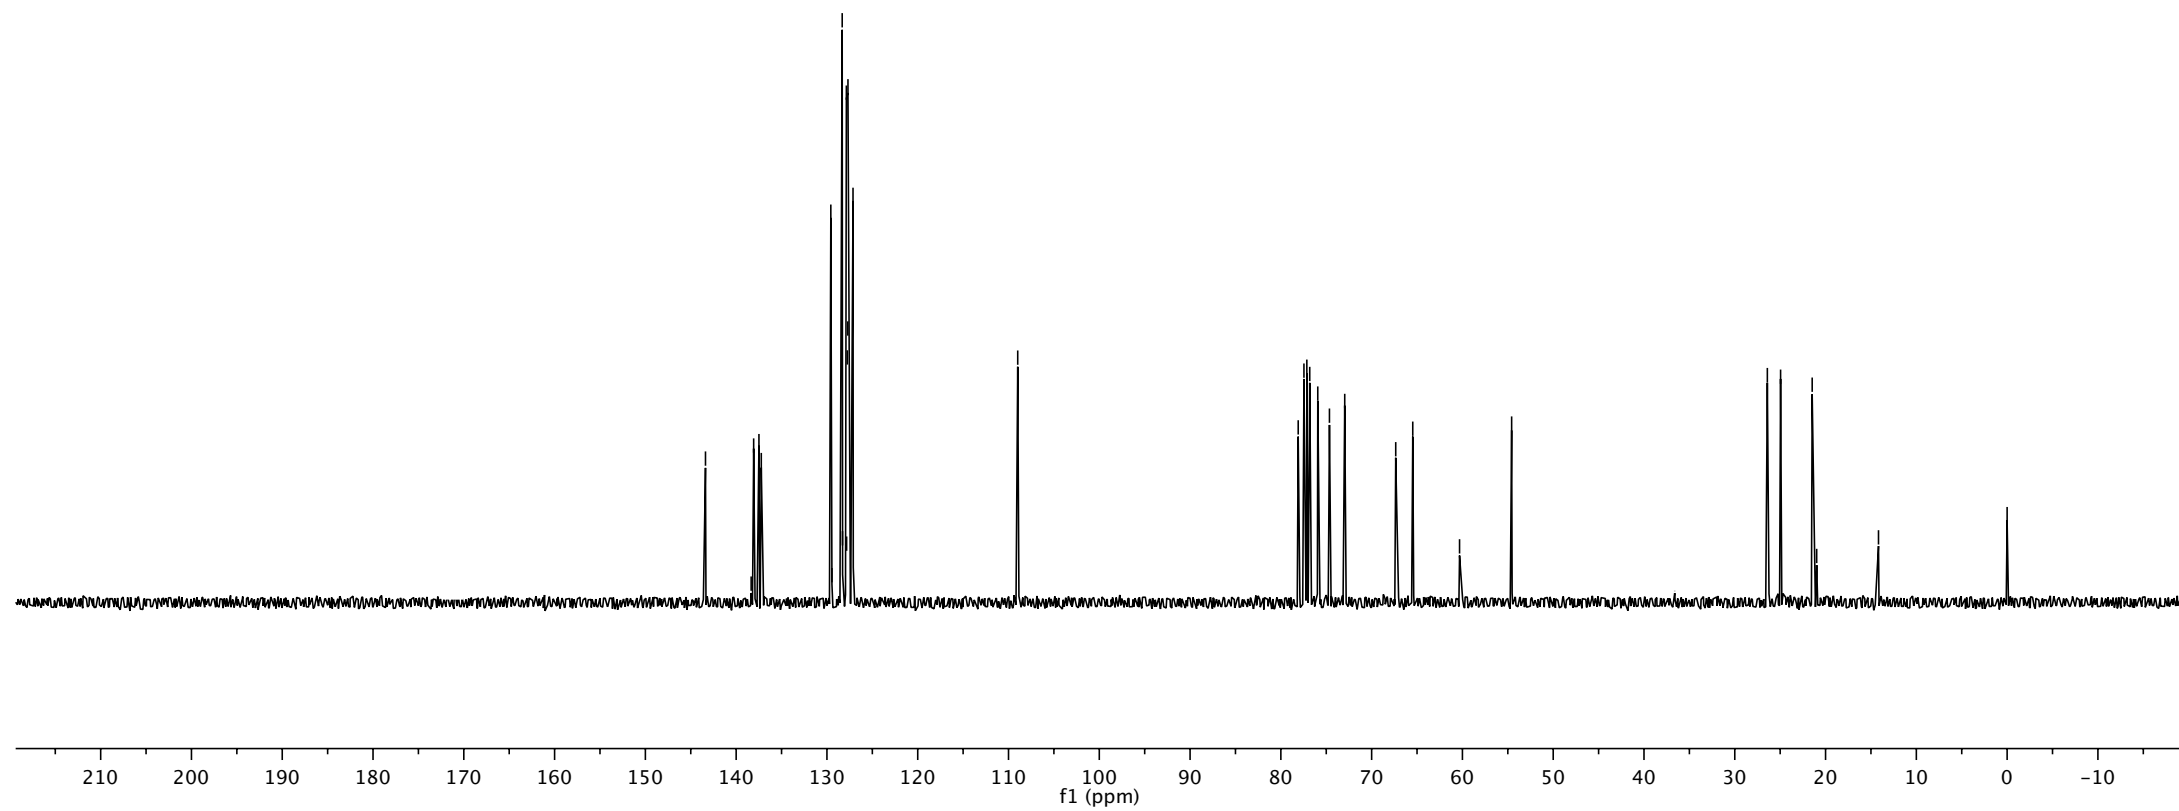





1H-NMR

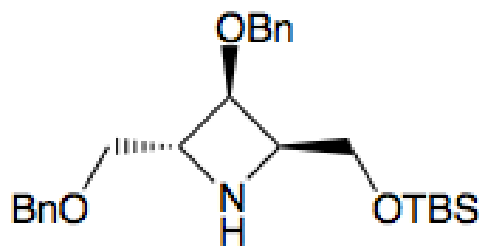

34

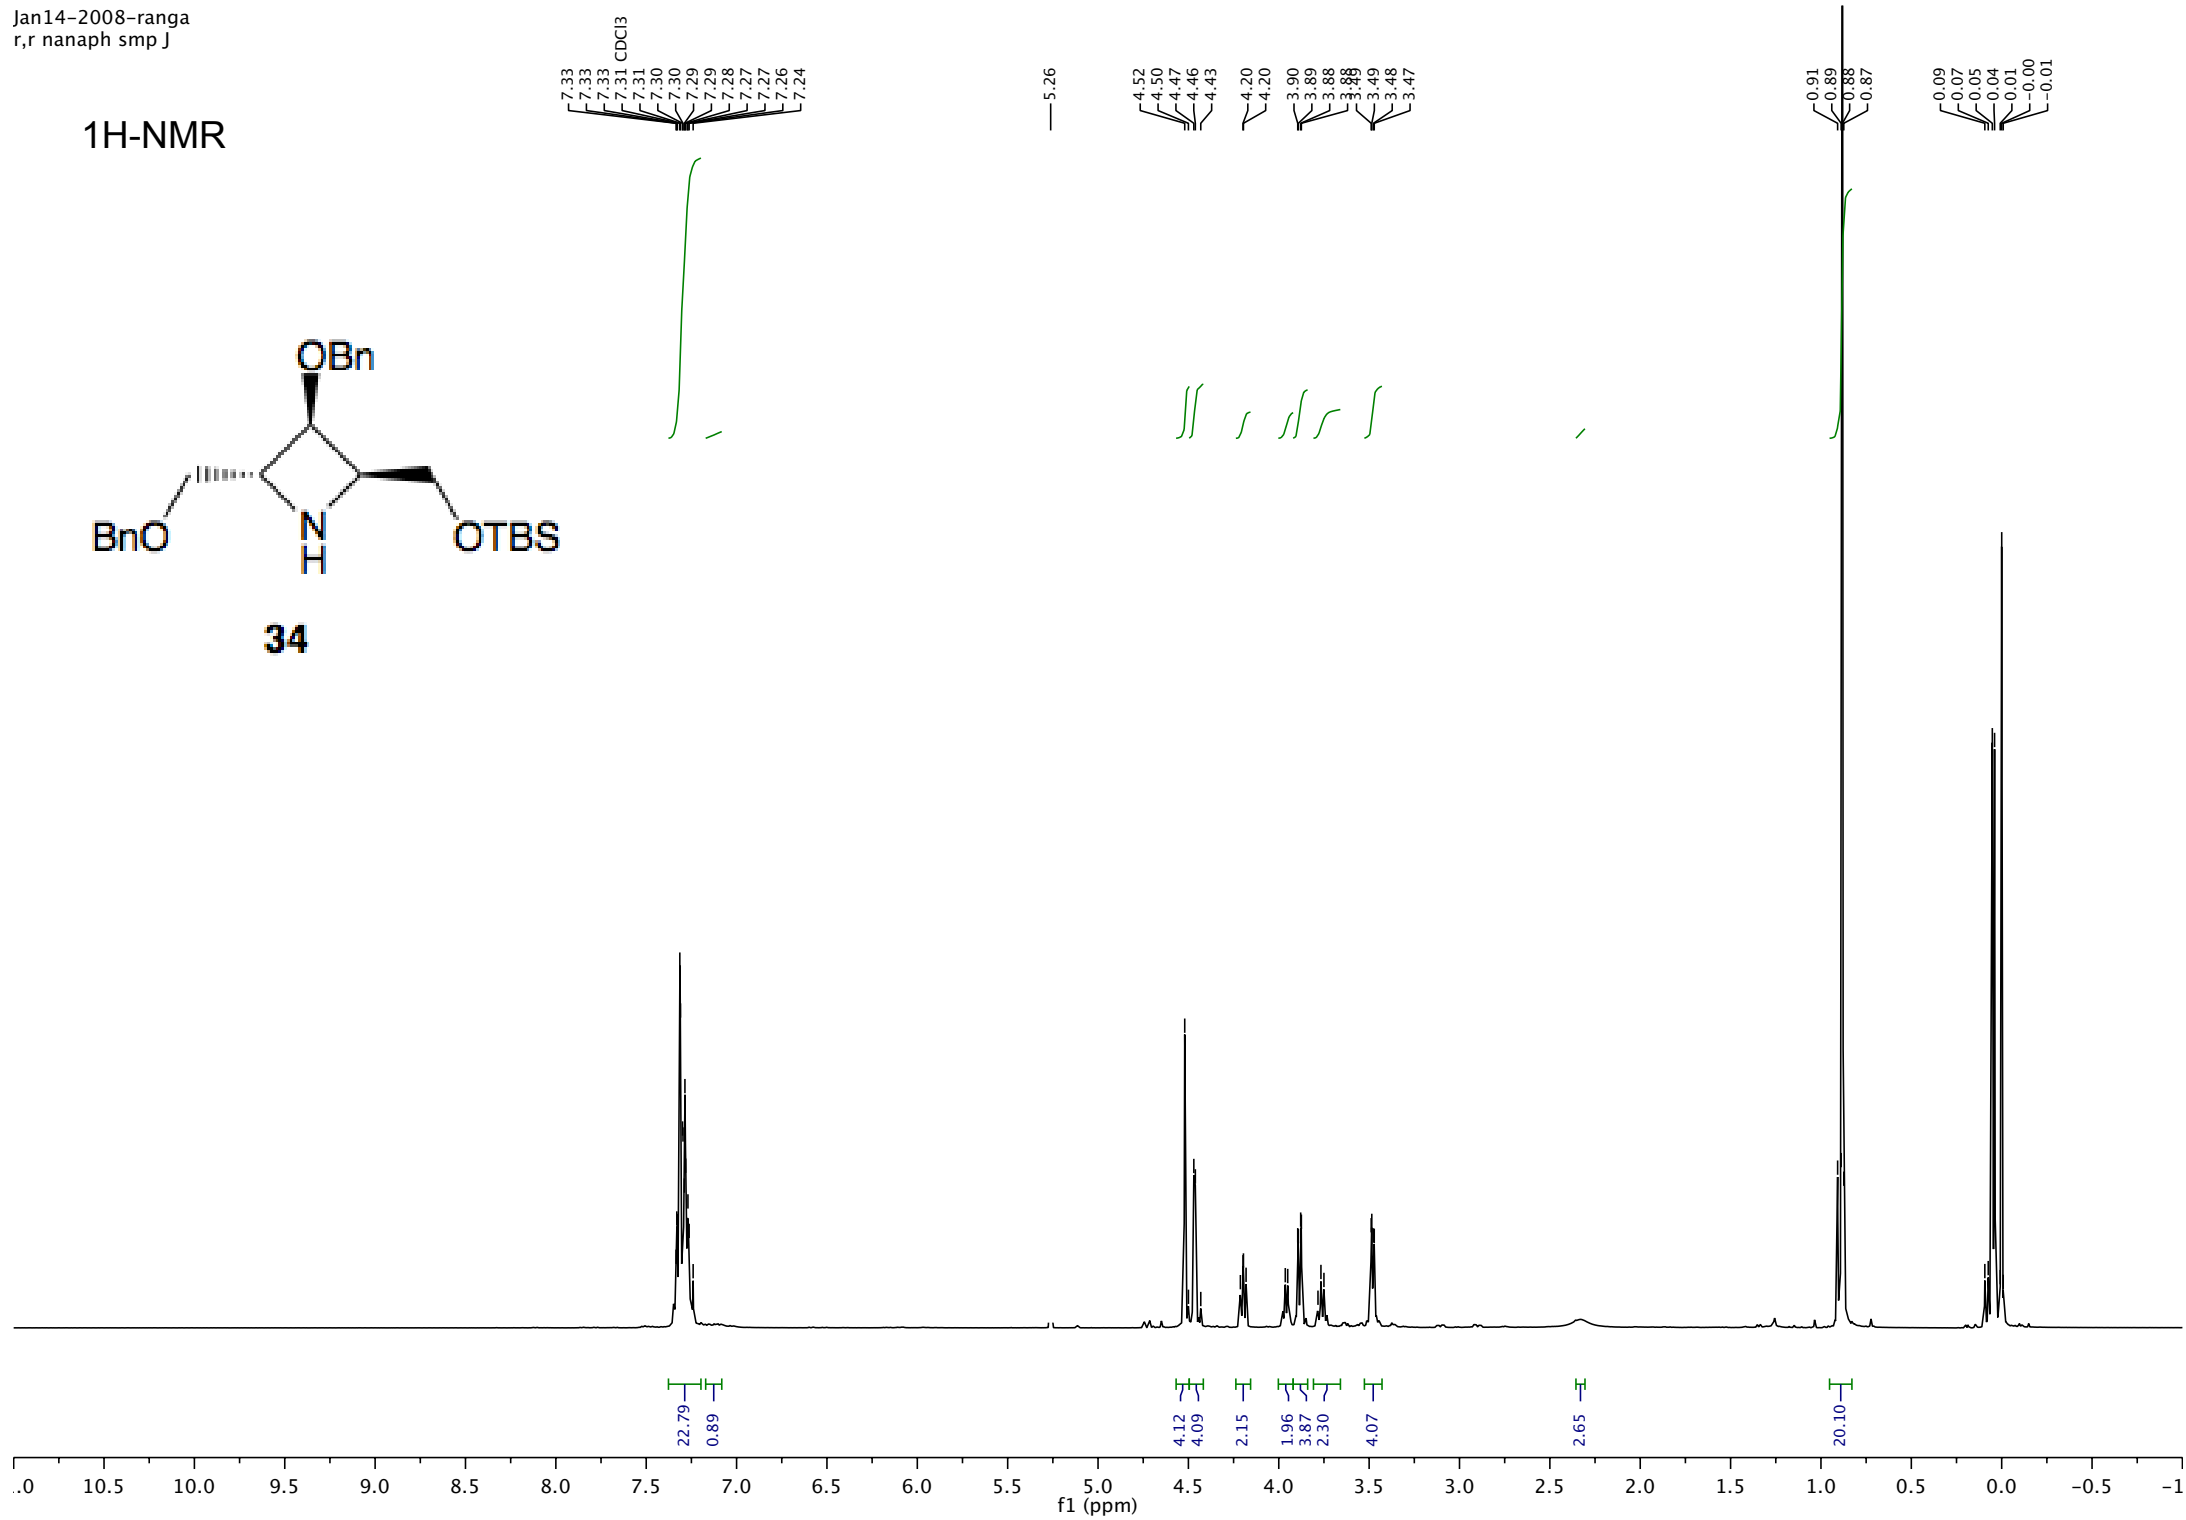

### 13C-NMR

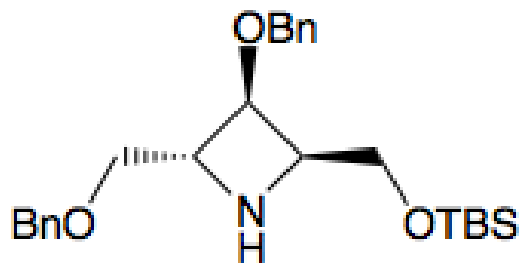

138.23  
138.14  
128.35  
128.32  
128.24  
127.72  
127.68  
127.63  
127.59  
127.56

80.59  
77.36  
77.04 CDCl3  
76.73 CDCl3  
74.71  
73.30  
72.43  
71.84  
64.03  
62.33  
61.56

25.91  
25.86  
18.26

0.00  
-4.59  
-5.29  
-5.31

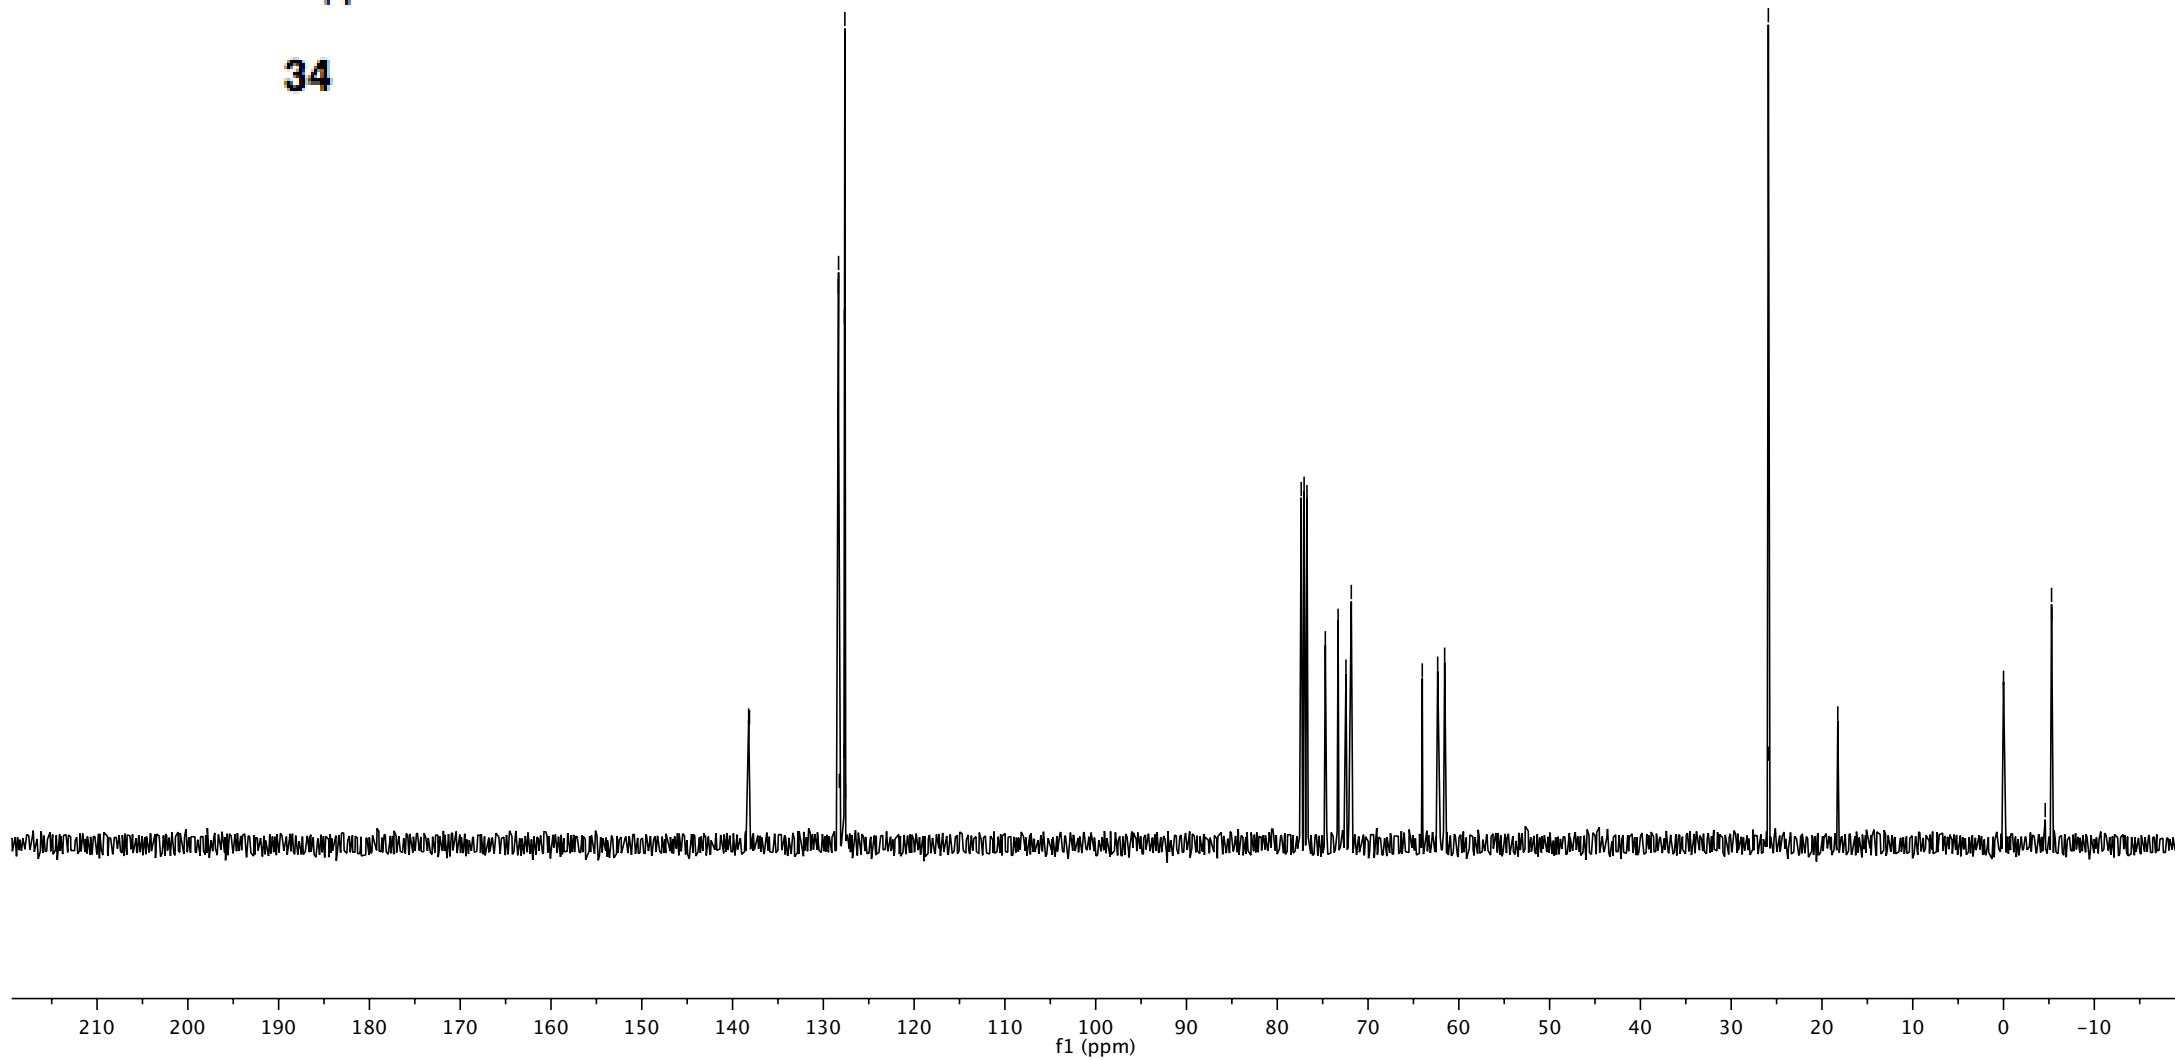

1H-NMR

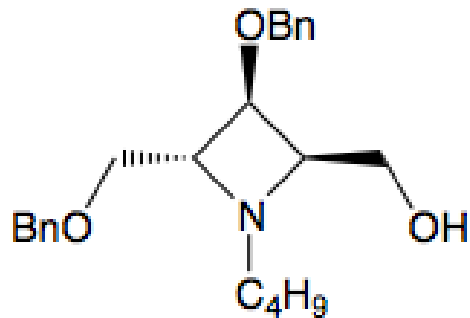

35a

7.36  
7.36  
7.35  
7.34  
7.34  
7.33  
7.33  
7.32  
7.31  
7.30  
7.30  
7.29  
7.29  
7.28  
7.28  
7.28  
7.27  
7.27  
7.26  
7.26  
7.25  
7.25

CDCl<sub>3</sub>

5.28

4.64  
4.56  
4.55  
4.53  
4.52  
4.49  
4.46  
4.43

3.94  
3.93  
3.92

3.55  
3.50  
3.49  
3.48  
3.47  
3.45  
3.23  
3.22

2.67  
2.66  
2.65  
2.64  
2.64  
2.64  
2.64  
2.04  
2.01

1.40  
1.38  
1.32  
1.30  
1.28  
1.28  
0.89  
0.88  
0.86

0.15  
0.05  
0.01  
0.01  
-0.01  
-0.05  
-0.15

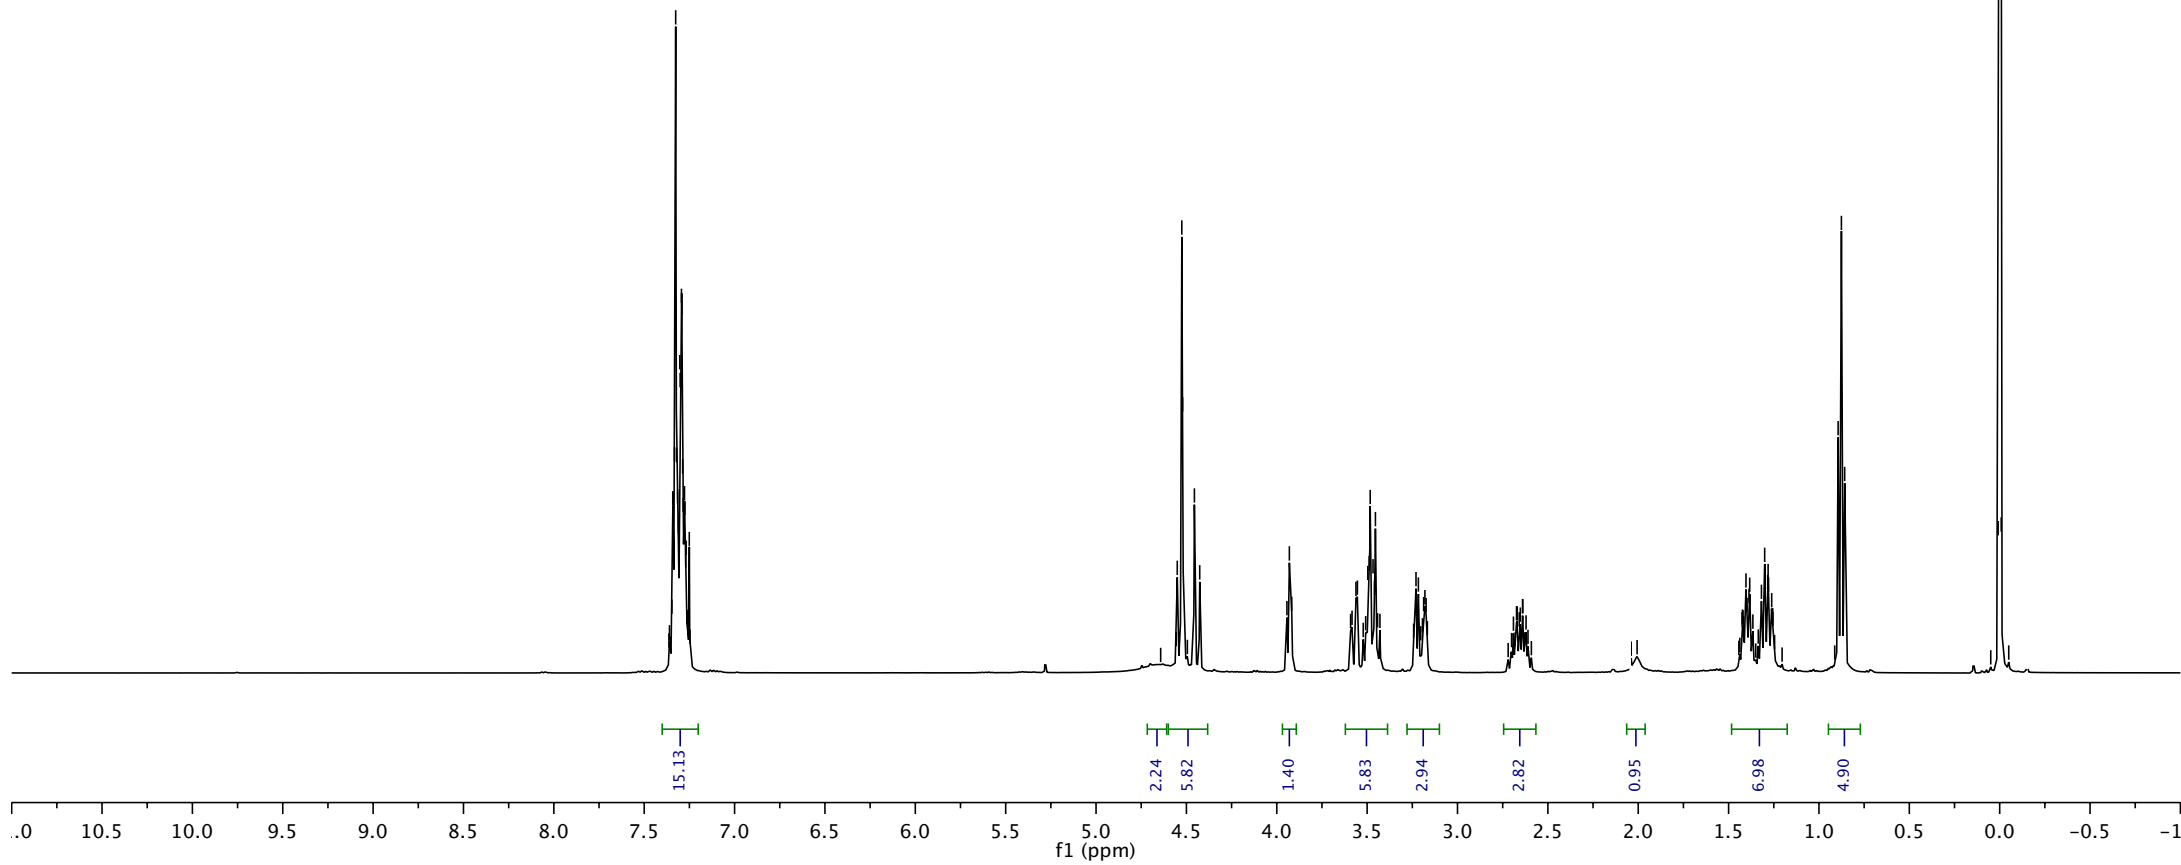

## 13C-NMR

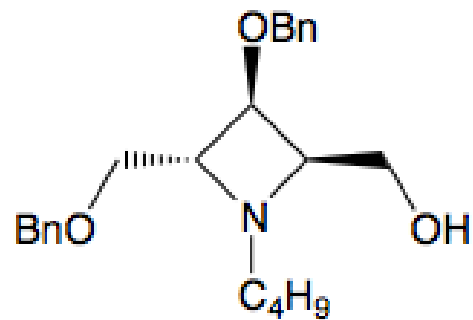

35a

138.16  
137.91  
128.44  
128.41  
128.36  
127.84  
127.61  
127.57

77.34 CDCl<sub>3</sub>  
77.03 CDCl<sub>3</sub>  
76.71 CDCl<sub>3</sub>  
73.35  
72.35  
71.64  
71.63  
71.25  
70.09

60.88  
57.73

30.05

20.45

13.89

0.00

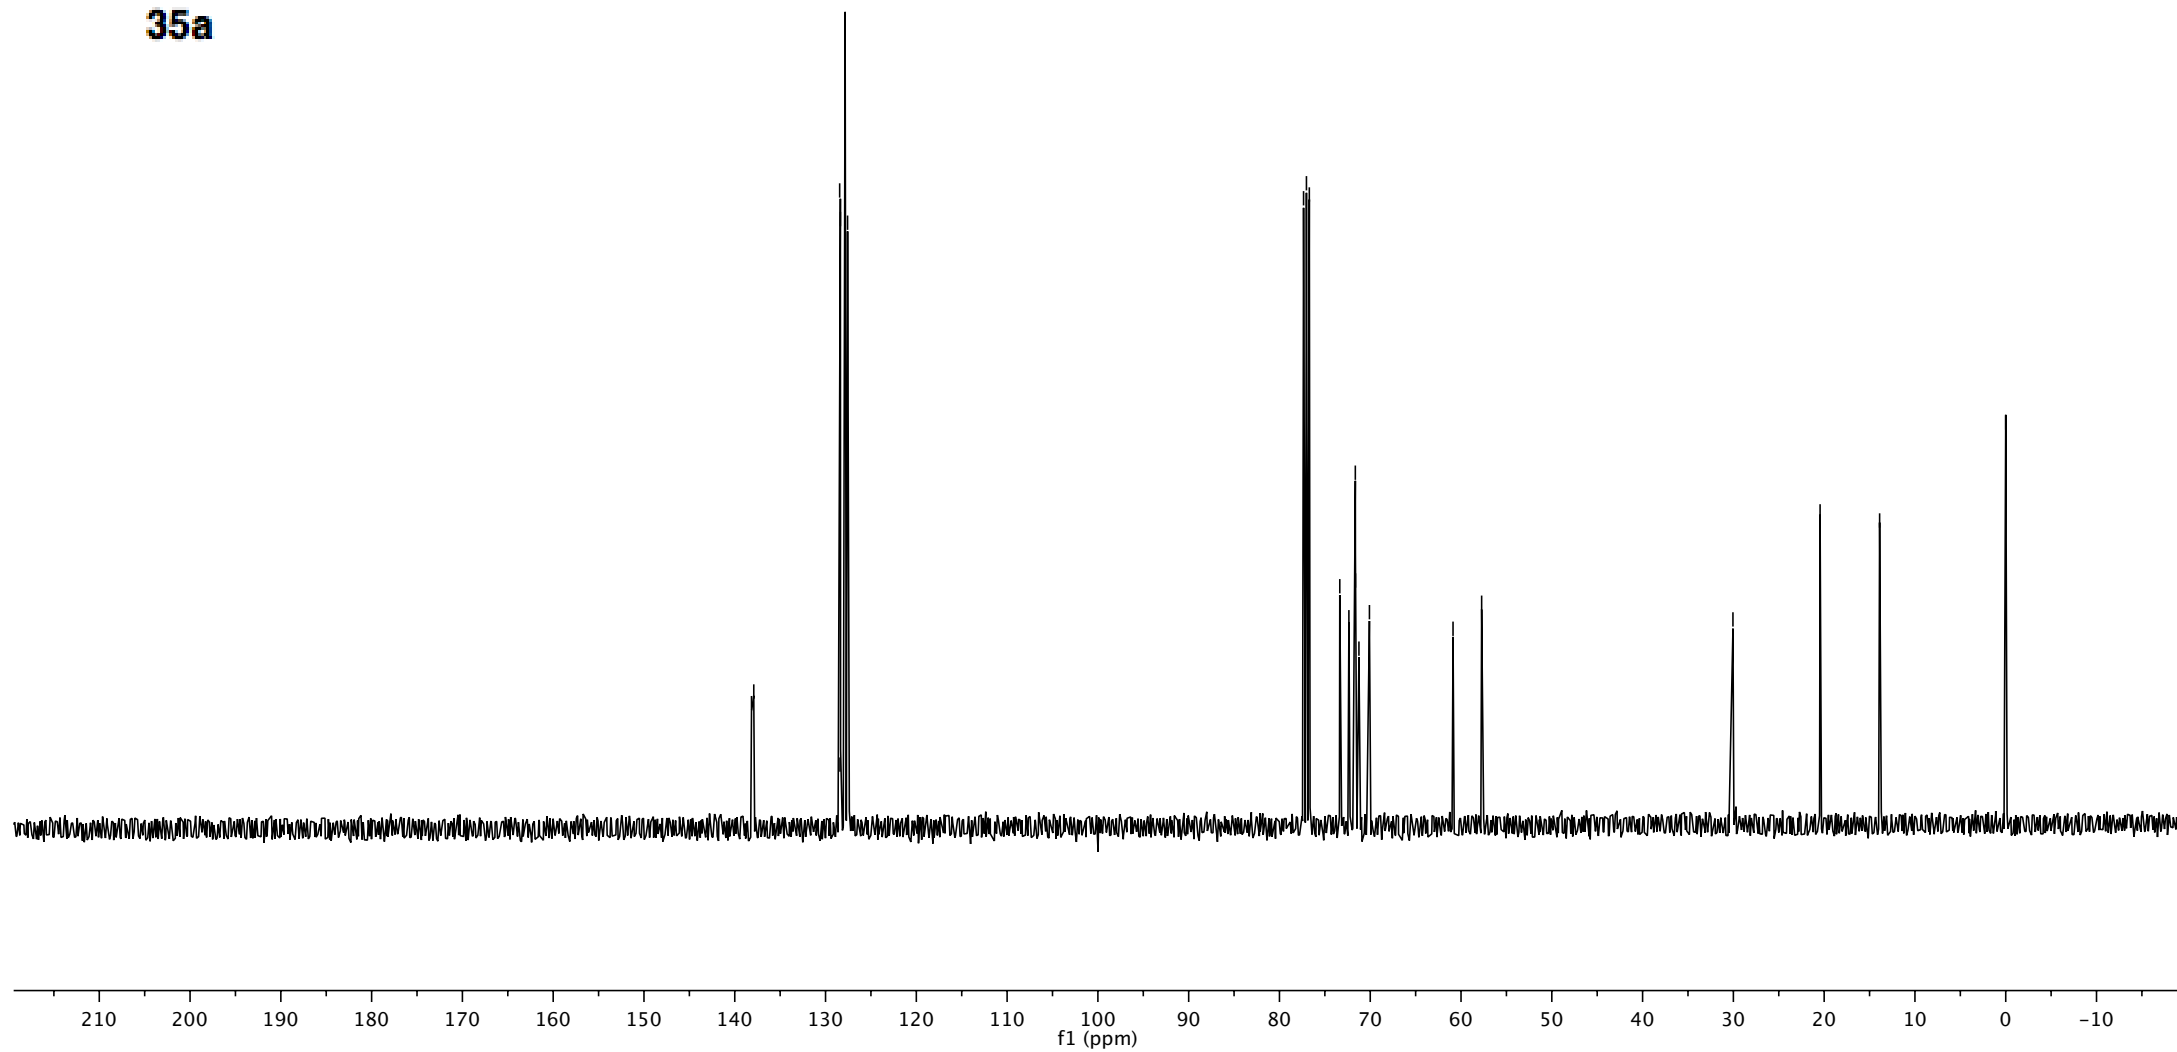

7.36  
7.36  
7.35  
7.34  
7.34  
7.33  
7.32  
7.31  
7.31  
7.30  
7.29  
7.28  
7.27  
7.26  
7.26 CDCl3  
7.25  
7.25  
4.60  
4.57  
4.53  
4.52  
4.48  
4.45  
4.26  
4.25  
4.24  
4.23  
4.08  
4.06  
4.04  
4.03  
3.94  
3.93  
3.91  
3.90  
3.78  
3.77  
3.76  
3.75  
3.74  
3.72  
3.71  
3.49  
3.48  
3.48  
3.47  
3.46  
3.45  
2.80  
2.79  
2.79  
2.78  
2.77  
2.76  
2.67  
2.66  
2.66  
2.65  
2.64  
1.38 H2O  
1.37 H2O  
1.31  
1.29  
1.28  
1.27  
1.26  
1.25  
0.91  
0.89  
0.88  
0.88  
0.86  
0.85  
0.01  
0.00  
-0.01

# 1H-NMR

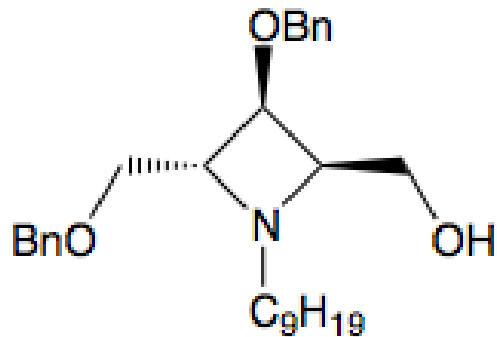

**35b**

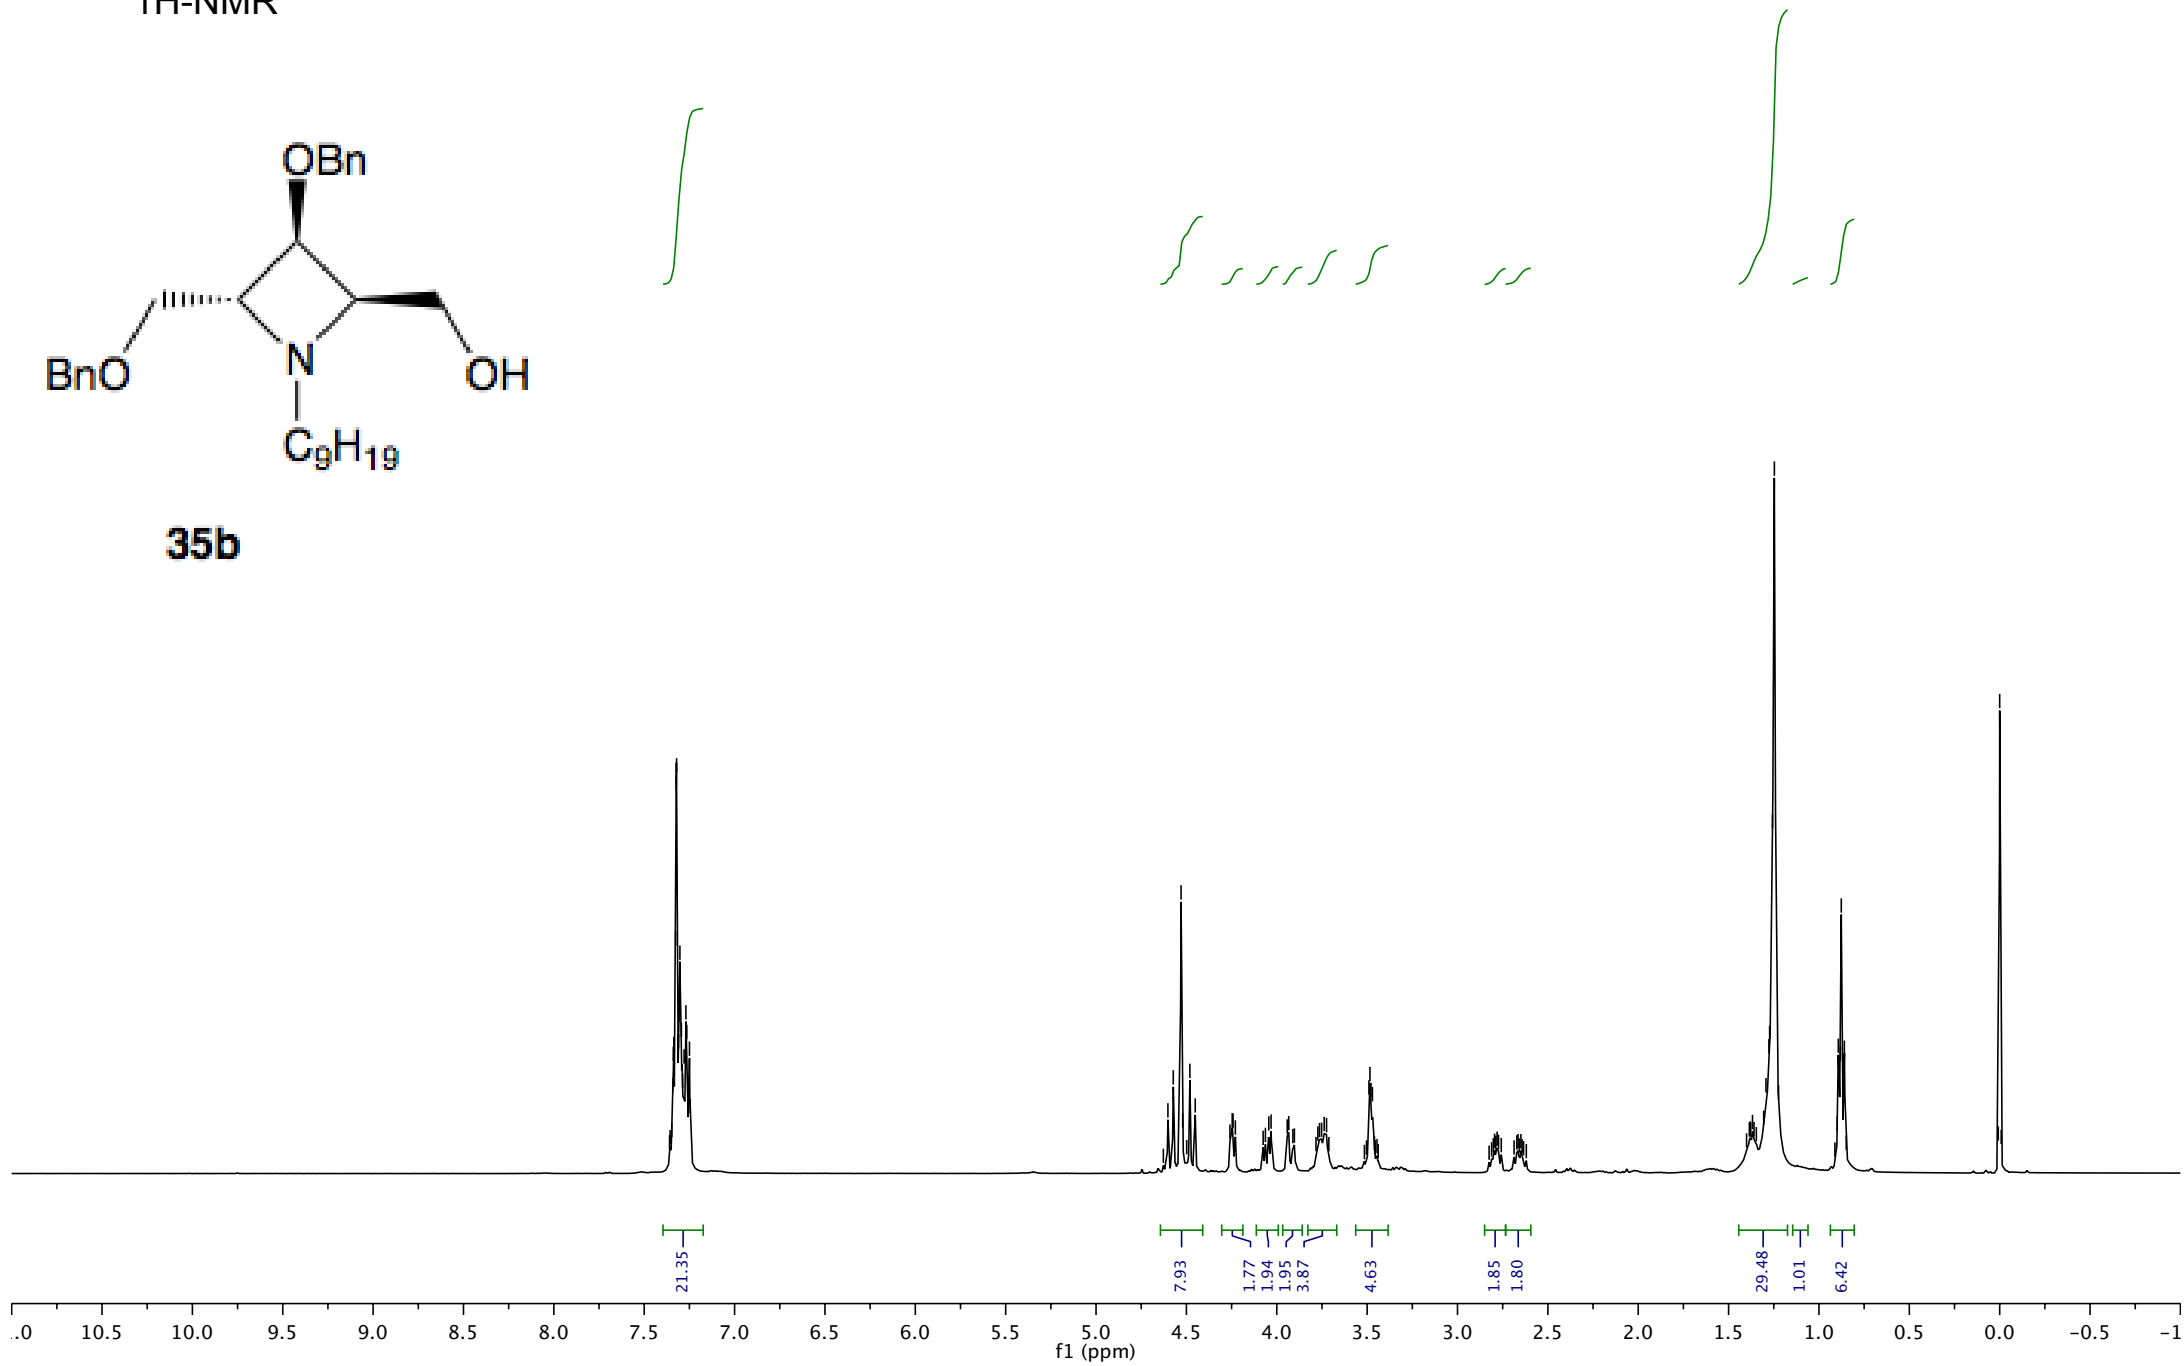



### 13C-NMR

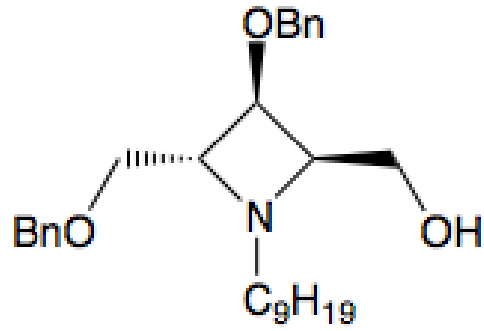

**35b**

138.14  
137.58  
128.49  
128.44  
128.37  
127.95  
127.90  
127.71  
127.69  
127.65  
127.61

77.37 CDCl<sub>3</sub>  
77.05 CDCl<sub>3</sub>  
76.73  
74.63  
73.37  
71.97  
65.15  
60.21

50.14

31.87  
29.56  
29.53  
29.28  
29.08  
27.44  
22.67

14.12

-0.00

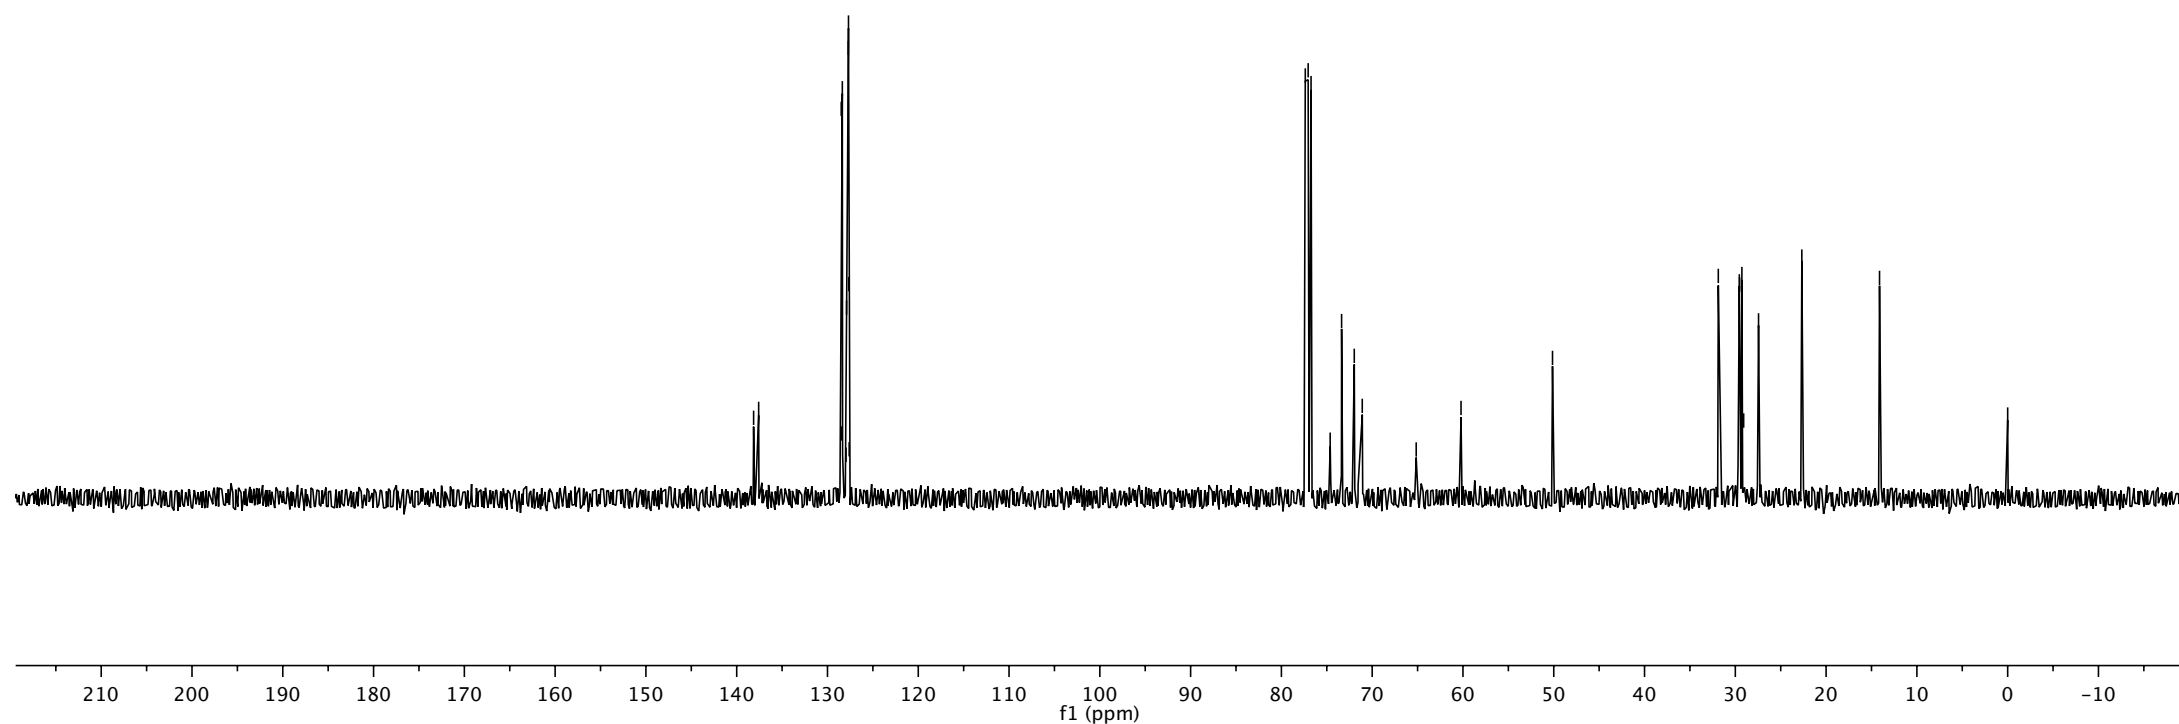

4.34  
4.32  
4.30  
4.06  
3.98  
3.96  
3.95  
3.93  
3.76  
3.75  
3.75  
3.72  
3.72  
3.70  
3.67  
3.69  
3.08  
3.06  
3.04  
3.03  
3.02  
3.00  
2.99  
2.97  
1.54  
1.52  
1.51  
1.50  
1.49  
1.48  
1.46  
1.45  
1.45  
1.44  
1.32  
1.30  
1.29  
1.28  
1.27  
1.26  
1.25  
1.25  
1.23  
1.23  
1.21  
1.21  
0.84  
0.82  
0.81  
0.80

### 1H-NMR

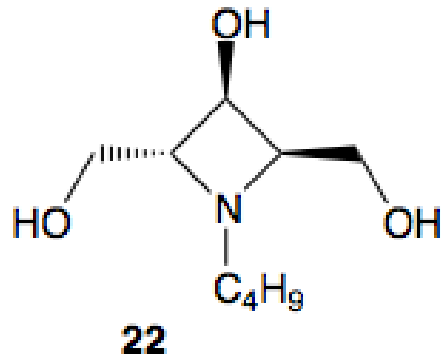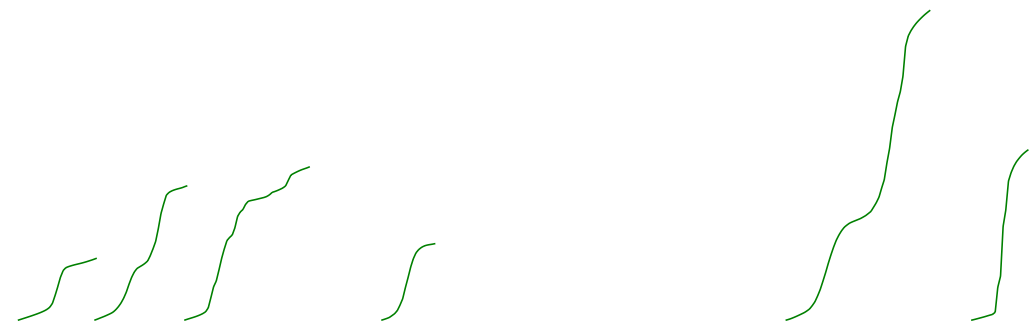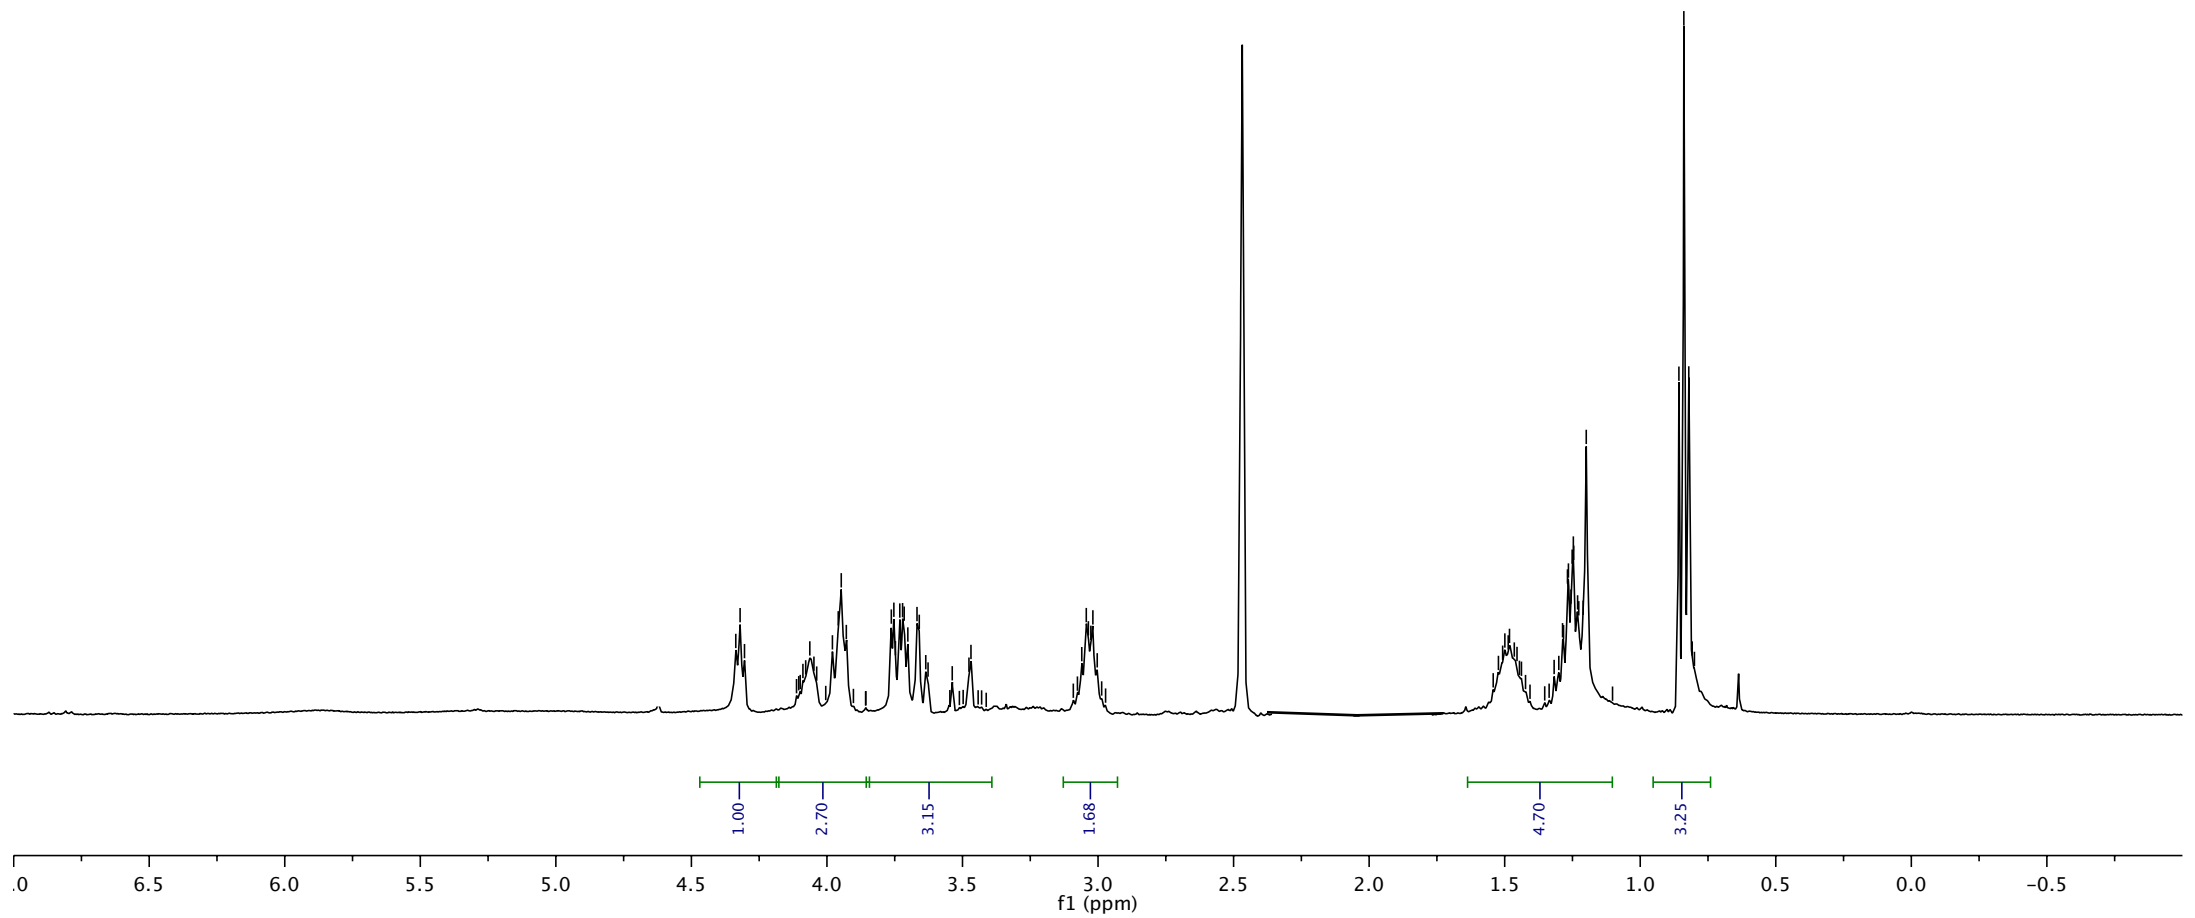

# 13C-NMR

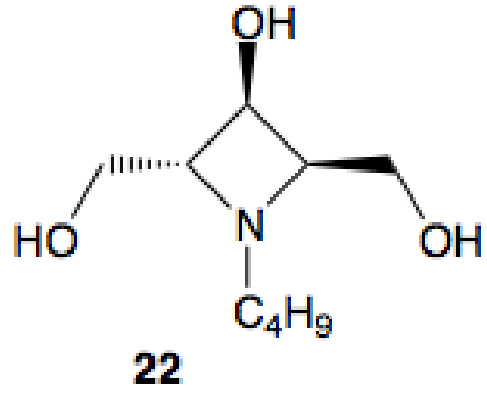

— 74.46  
— 69.59  
— 62.72  
— 57.87  
— 55.76  
— 48.56  
  
— 26.89  
— 19.66  
— 13.34

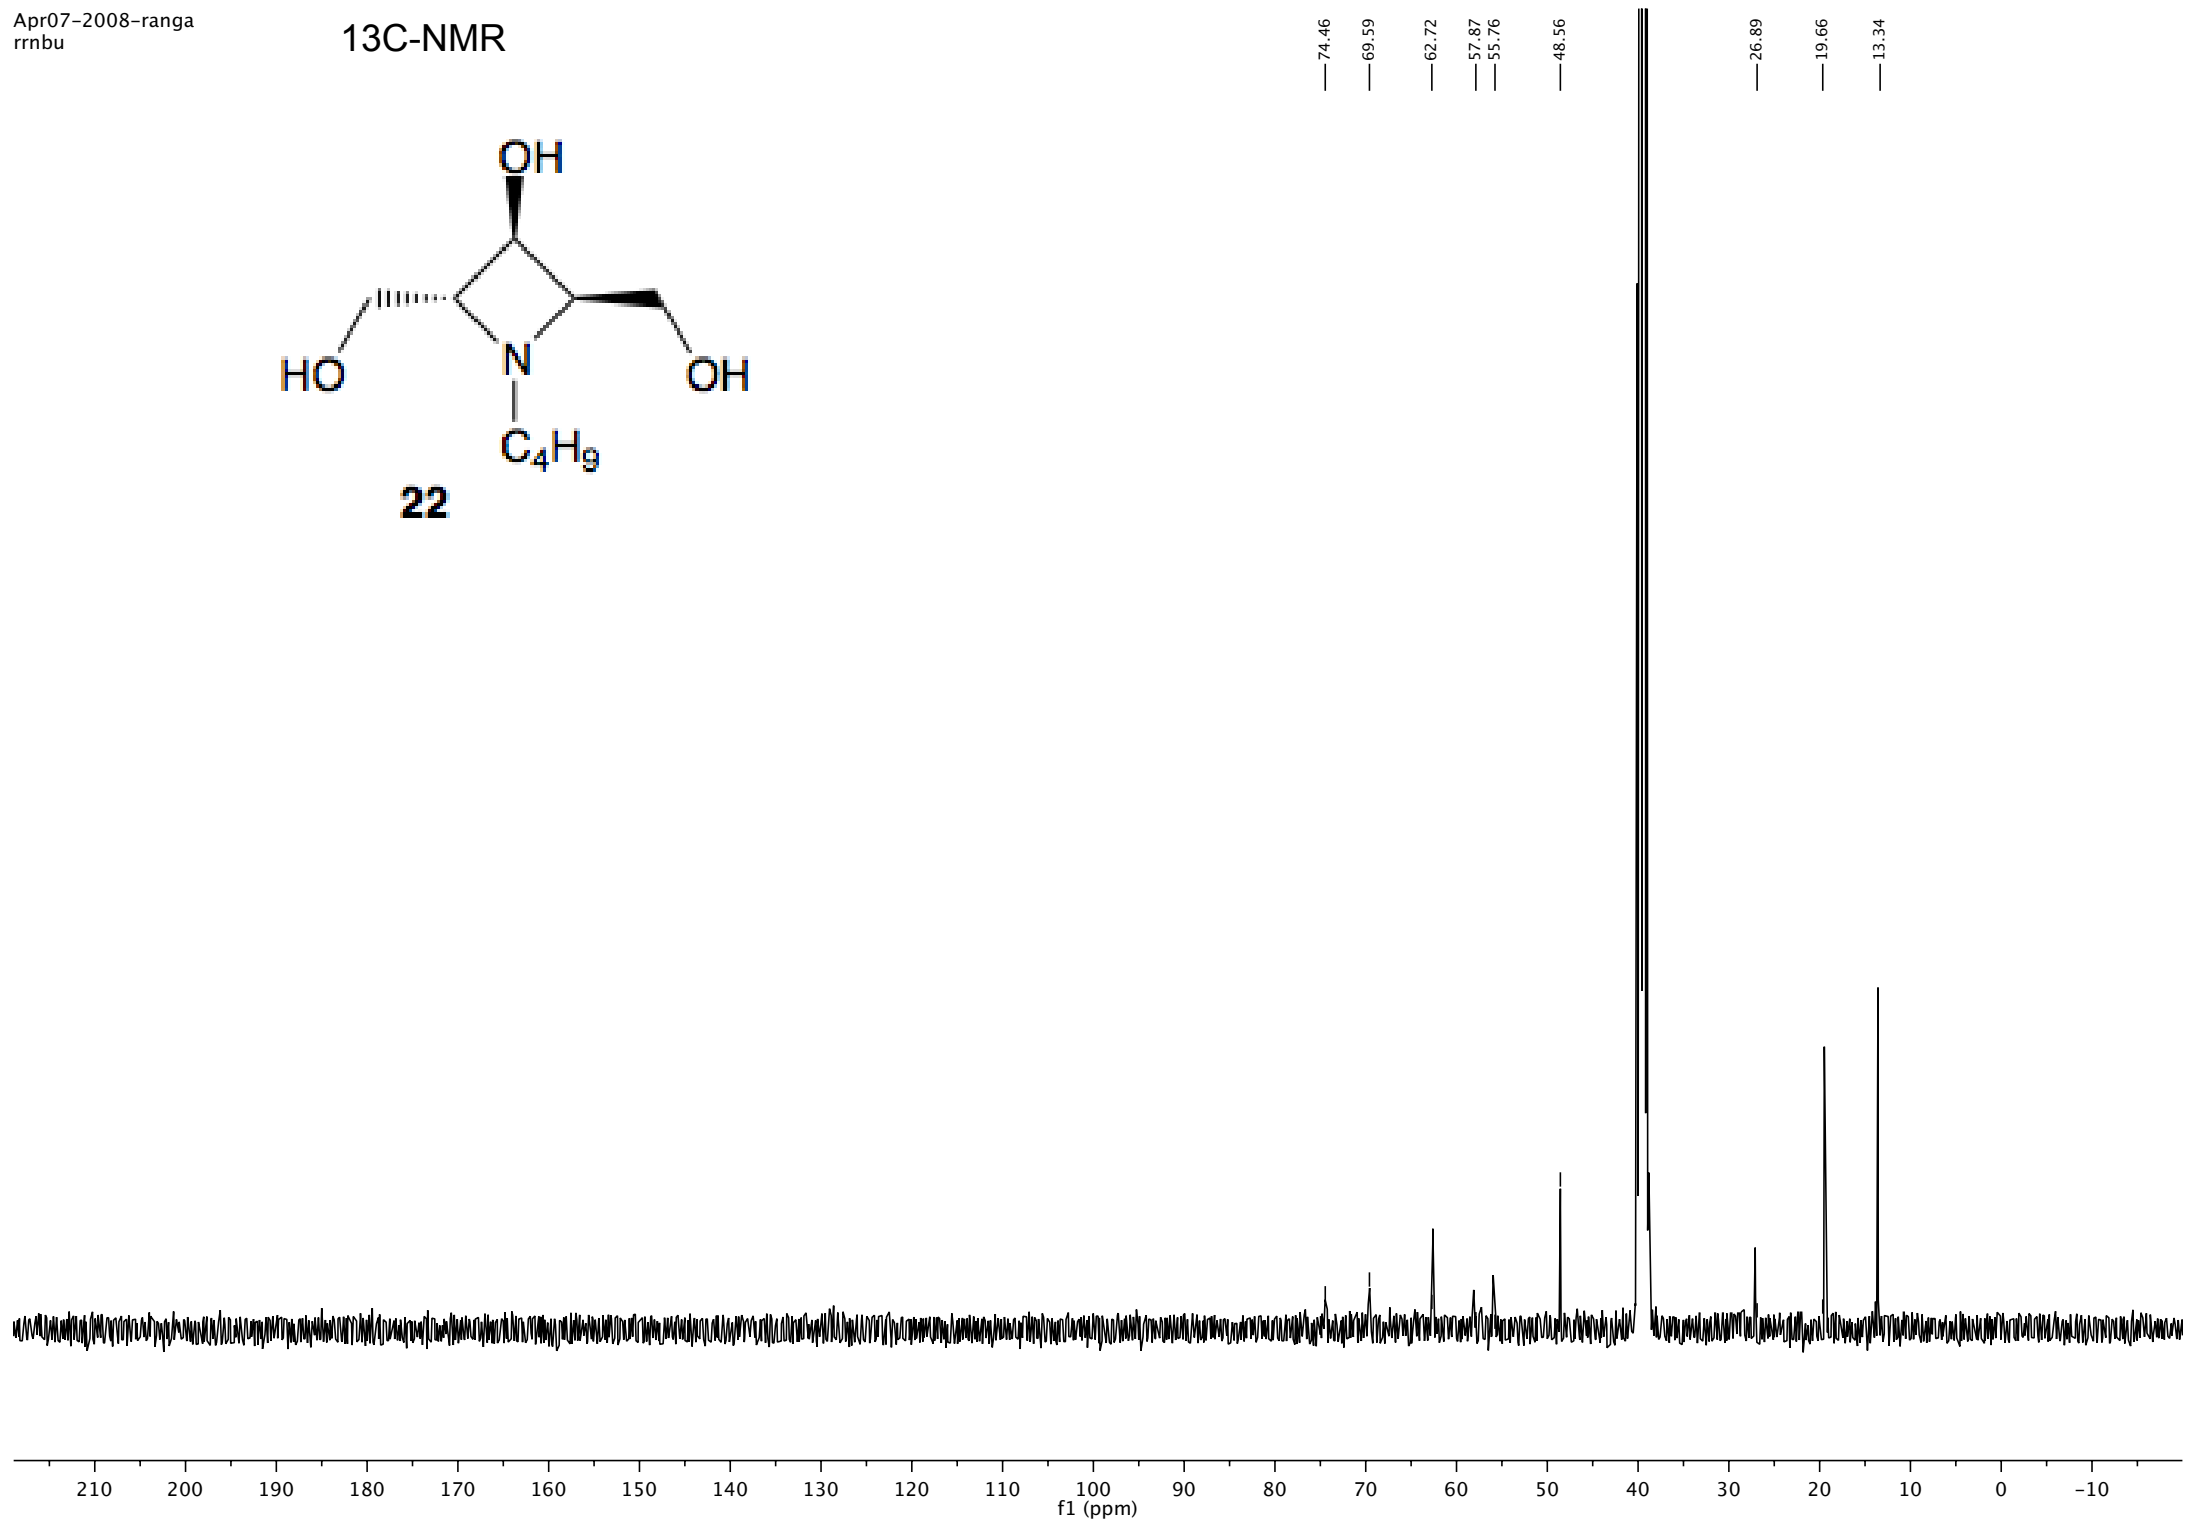

# 1H-NMR

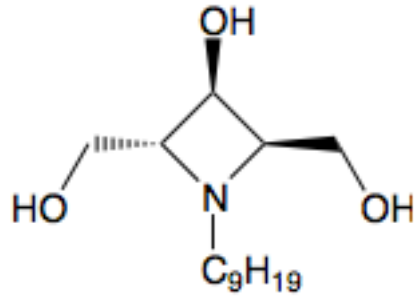

23

- 4.18
- 4.17
- 4.16
- 3.86
- 3.84
- 3.83
- 3.81
- 3.76
- 3.72
- 3.71
- 3.69
- 3.68
- 3.56 HDO
- 3.53 HDO
- 2.87
- 2.85
- 2.84
- 2.76
- 2.75
- 2.74
- 2.73
- 2.73
- 2.71
- 2.48 DMSO
- 2.47 DMSO
- 2.47 DMSO
- 2.46 DMSO
- 2.46 DMSO
- 1.40
- 1.39
- 1.38
- 1.37
- 1.26
- 1.24
- 1.22
- 1.20
- 1.14
- 0.84
- 0.82
- 0.80

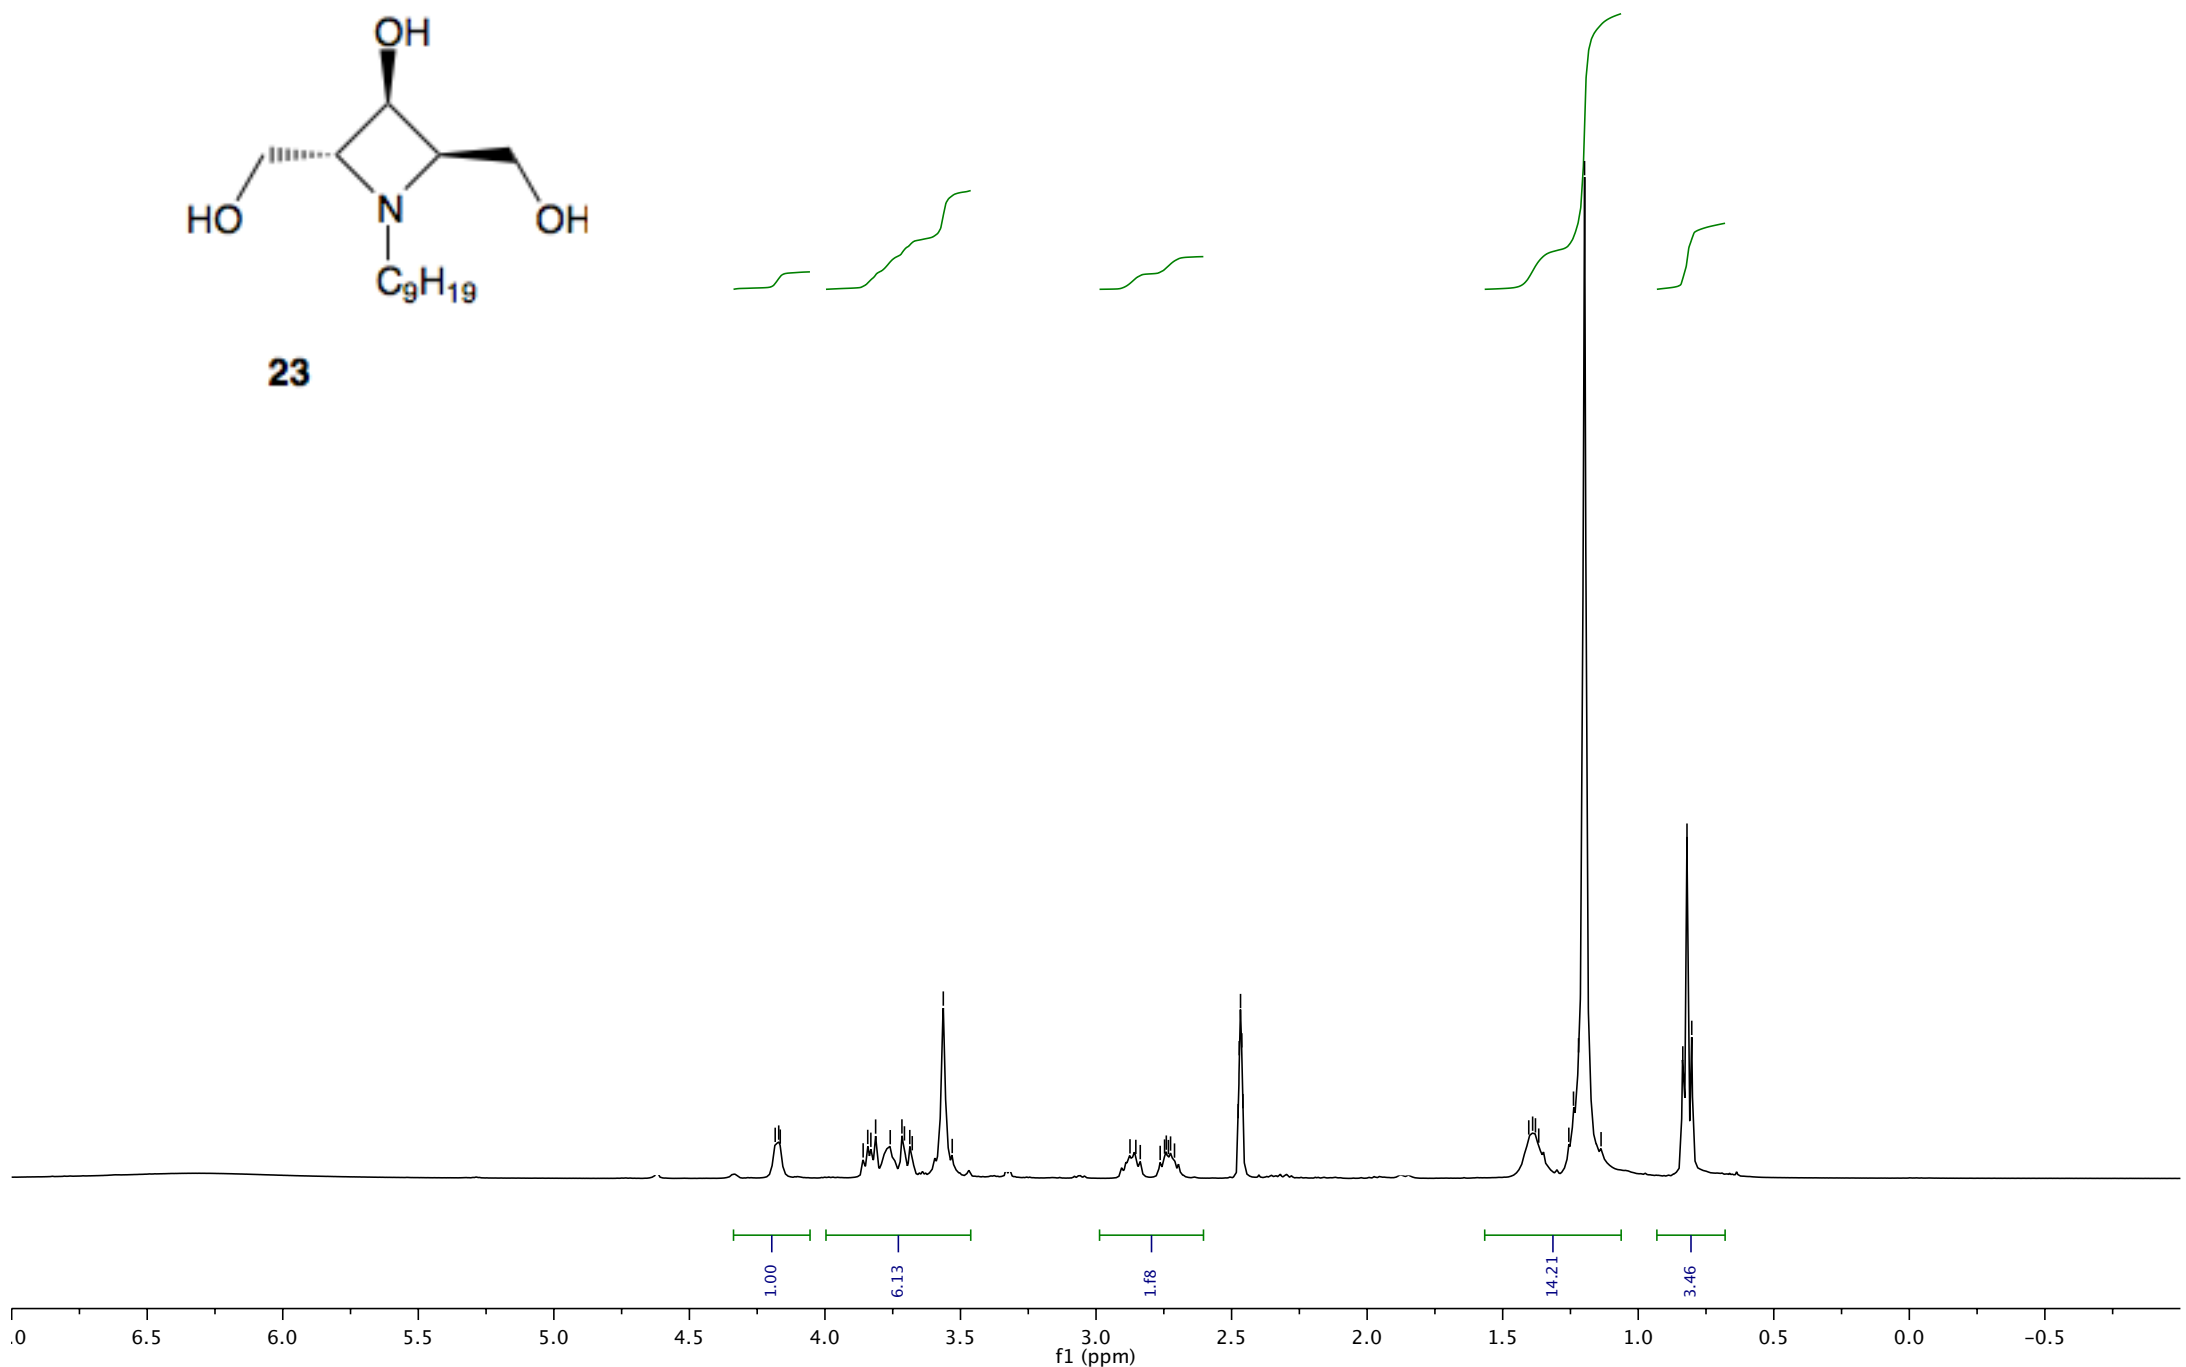

# <sup>13</sup>C-NMR

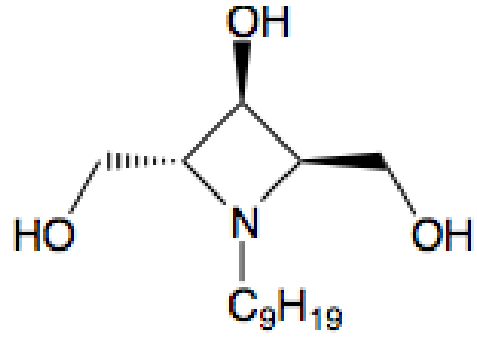

**23**

- 73.69
- 68.25
- 63.90
- 59.68
- 56.84
- 49.16
- 40.10
- 39.89 DMSO
- 39.68 DMSO
- 39.57 DMSO
- 39.26 DMSO
- 39.05 DMSO
- 28.87
- 28.75
- 28.59
- 26.55
- 26.45
- 22.05
- 13.90

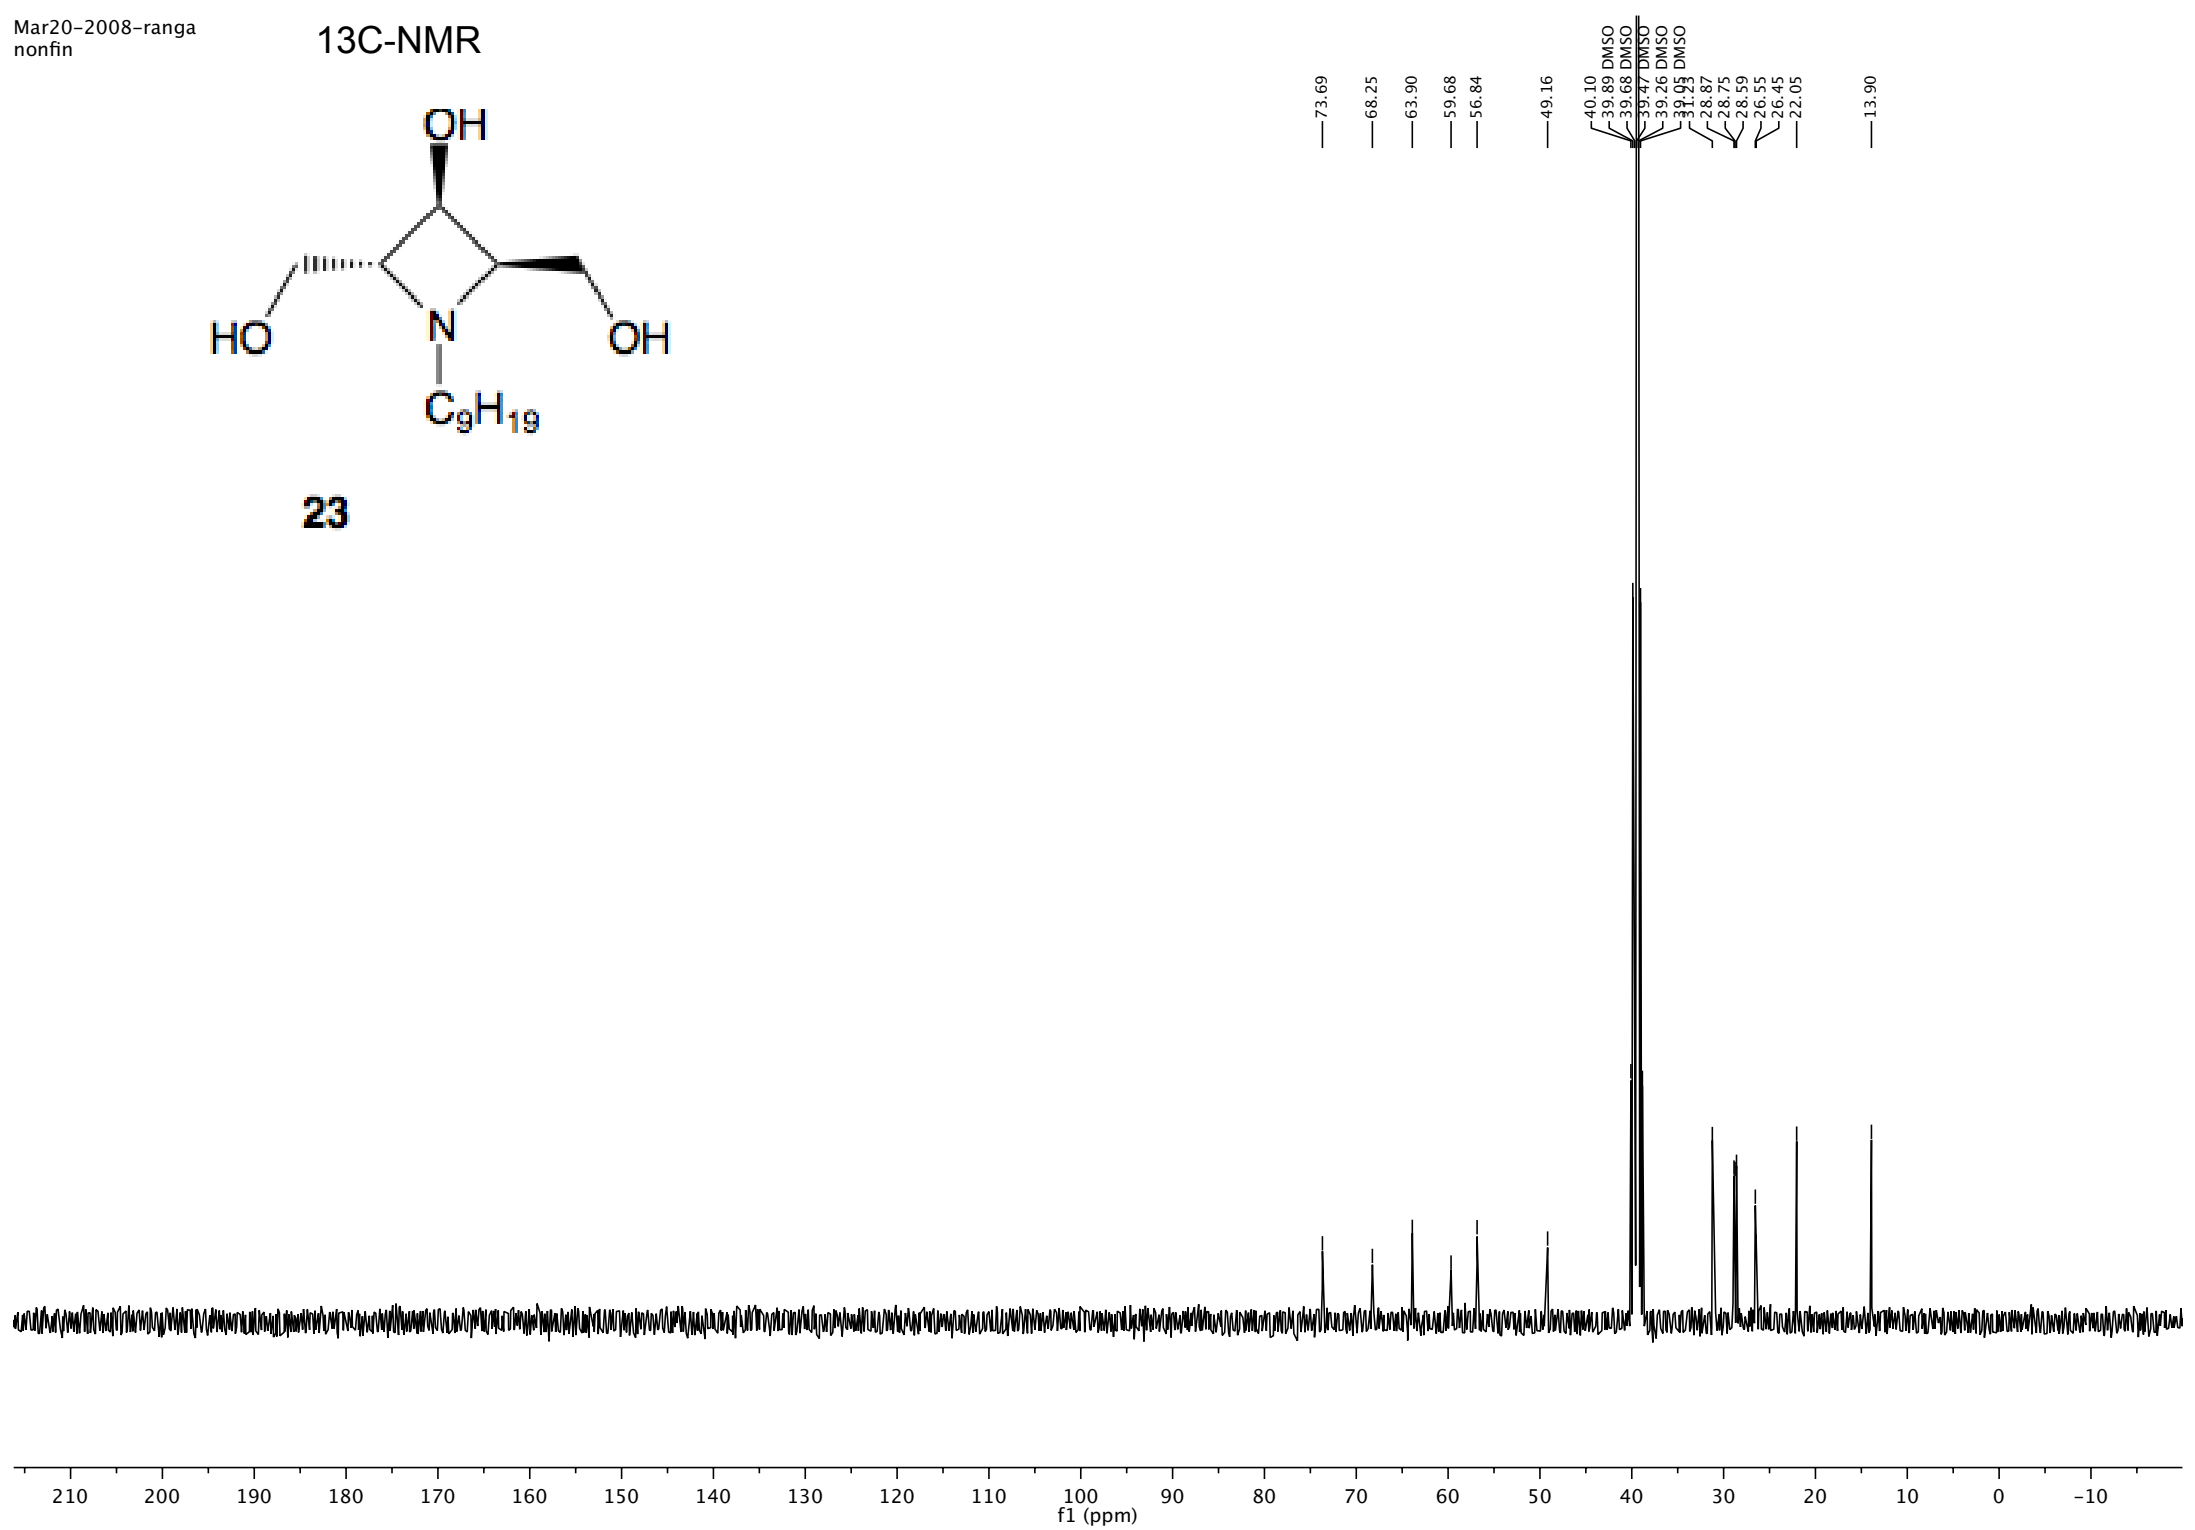

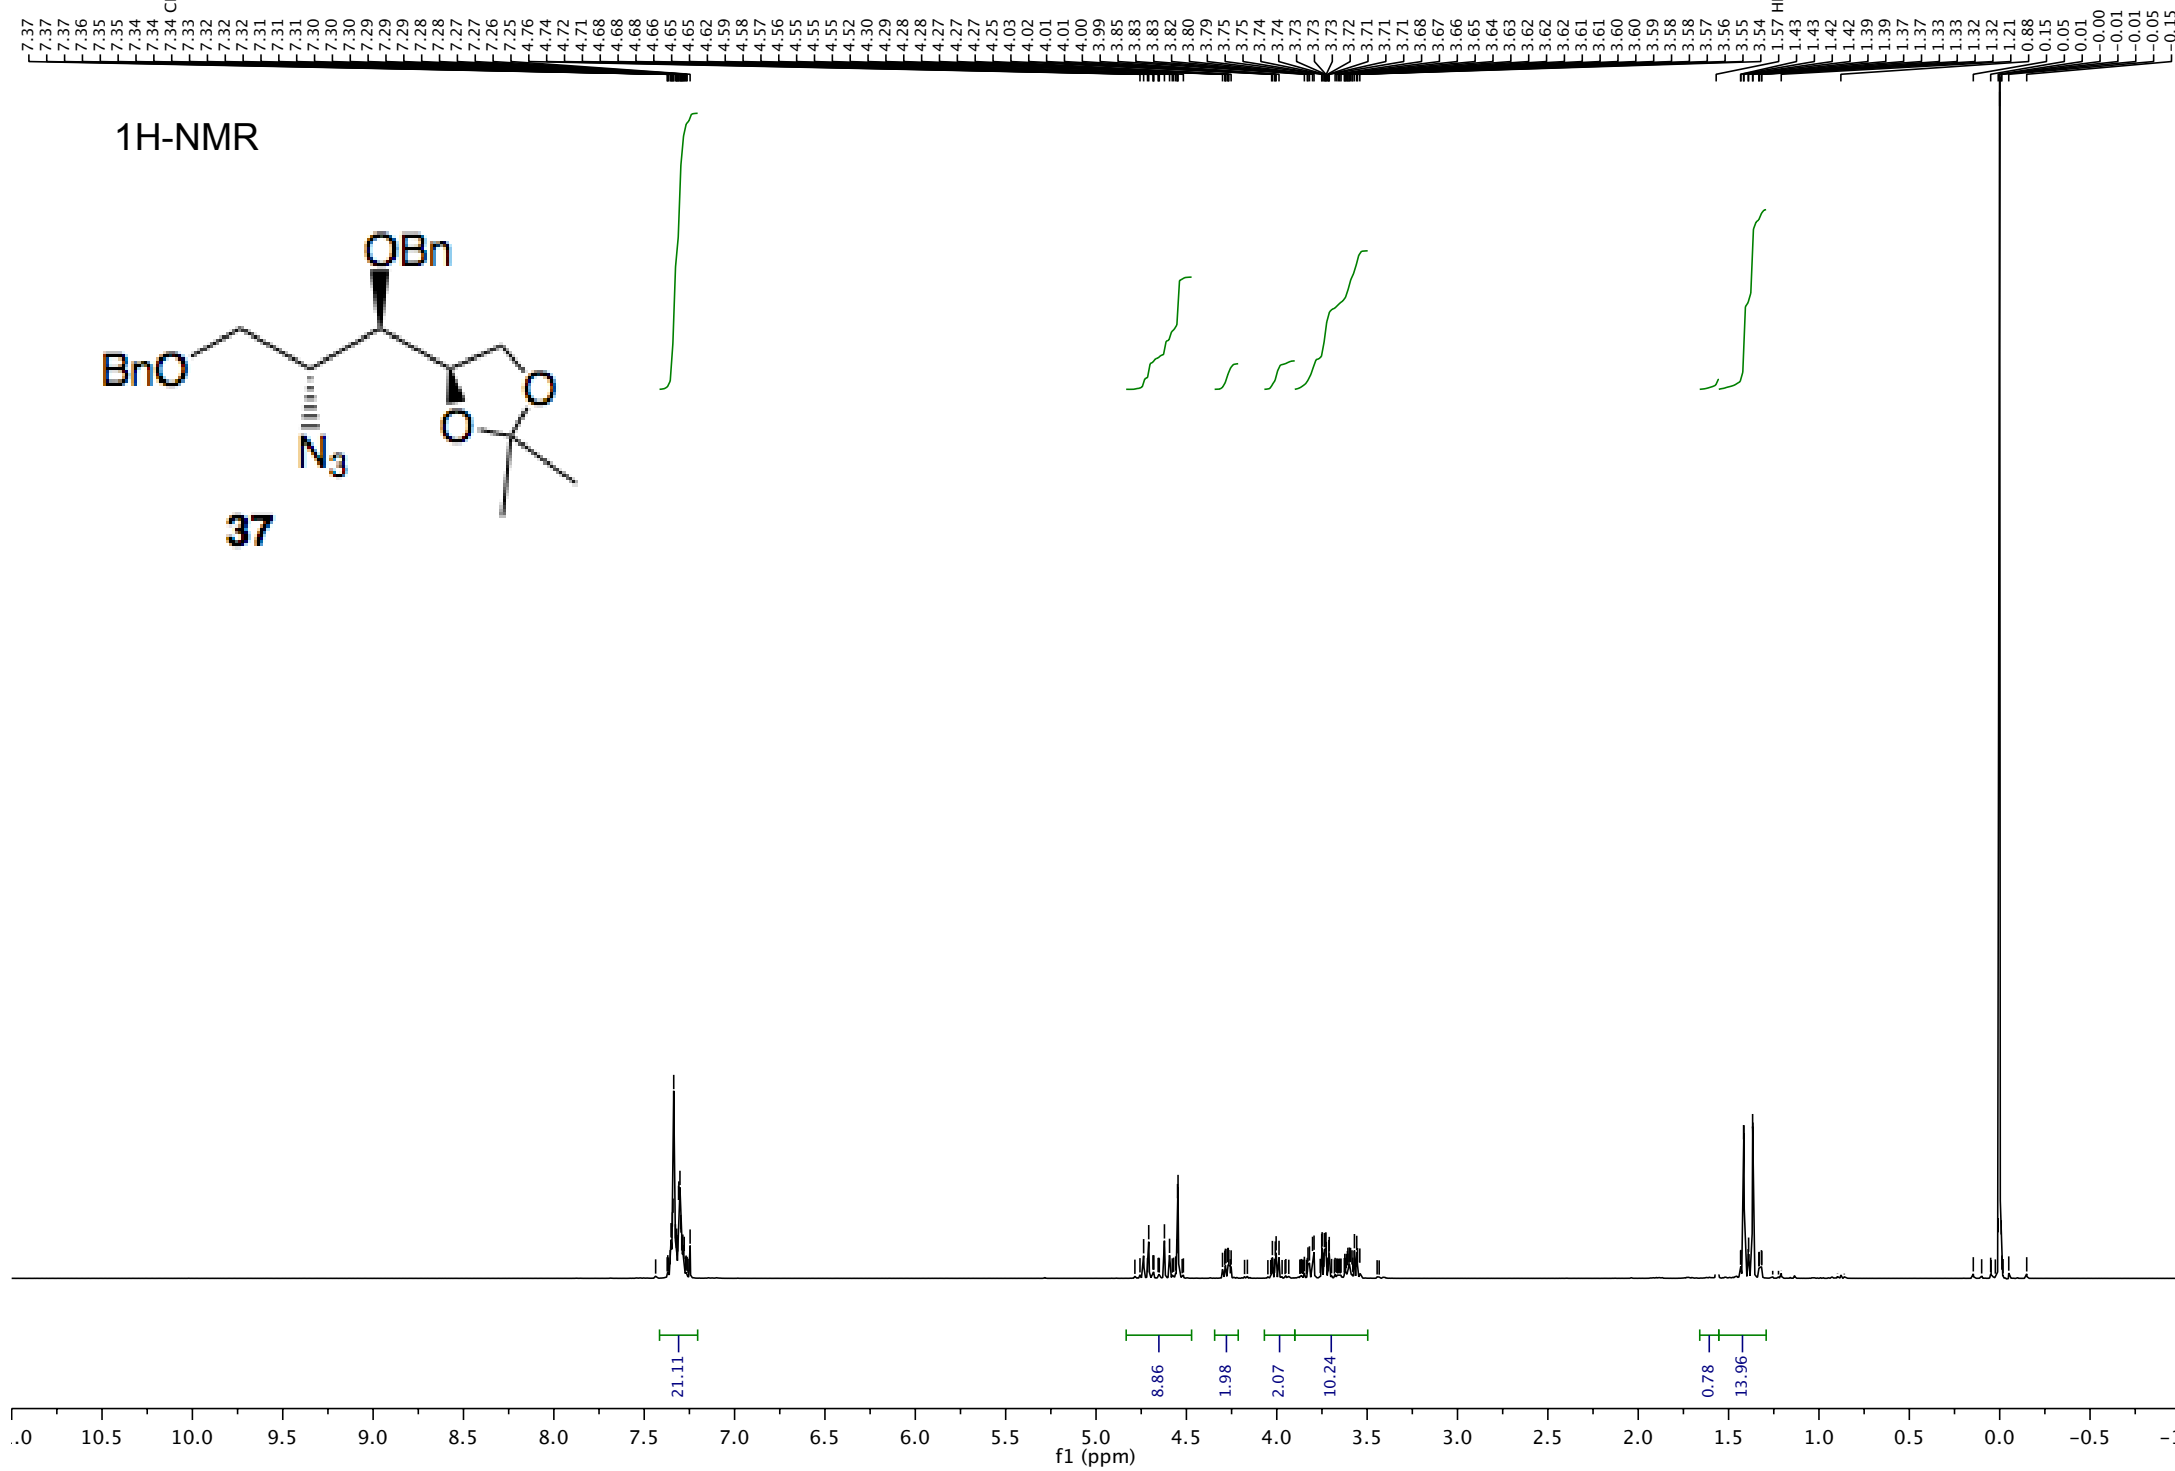

### 13C-NMR

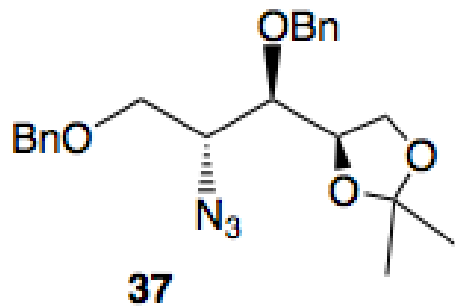

137.84  
137.60  
128.47  
128.43  
128.36  
128.12  
128.02  
127.84  
127.81  
127.75  
127.65

109.22

78.38  
77.34 CDC13  
77.02 CDC13  
76.95 CDC13  
76.70 CDC13  
74.59  
73.45  
69.19  
65.99  
62.07

26.39  
25.63

0.00

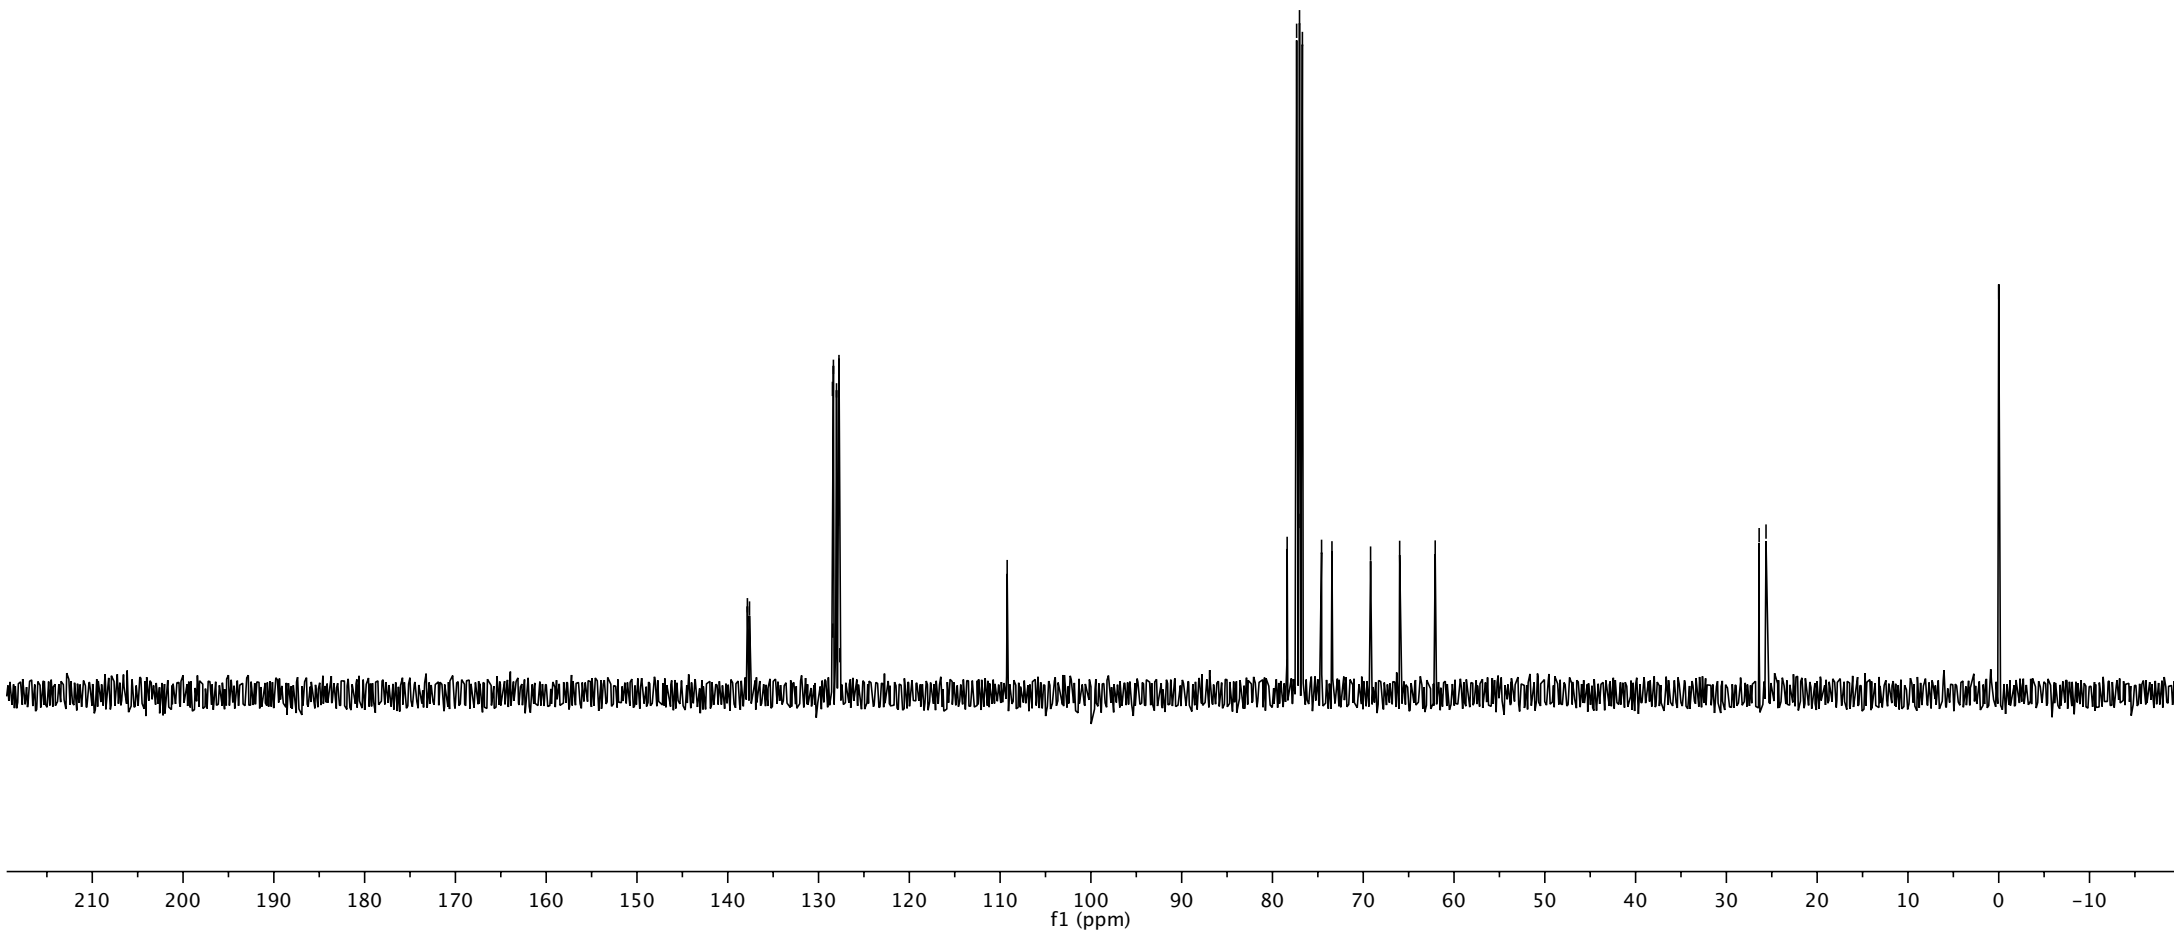

Aug29-2007  
meso-tosyl

# 1H-NMR

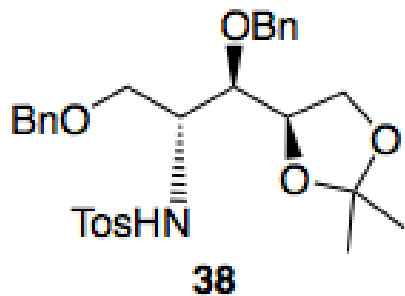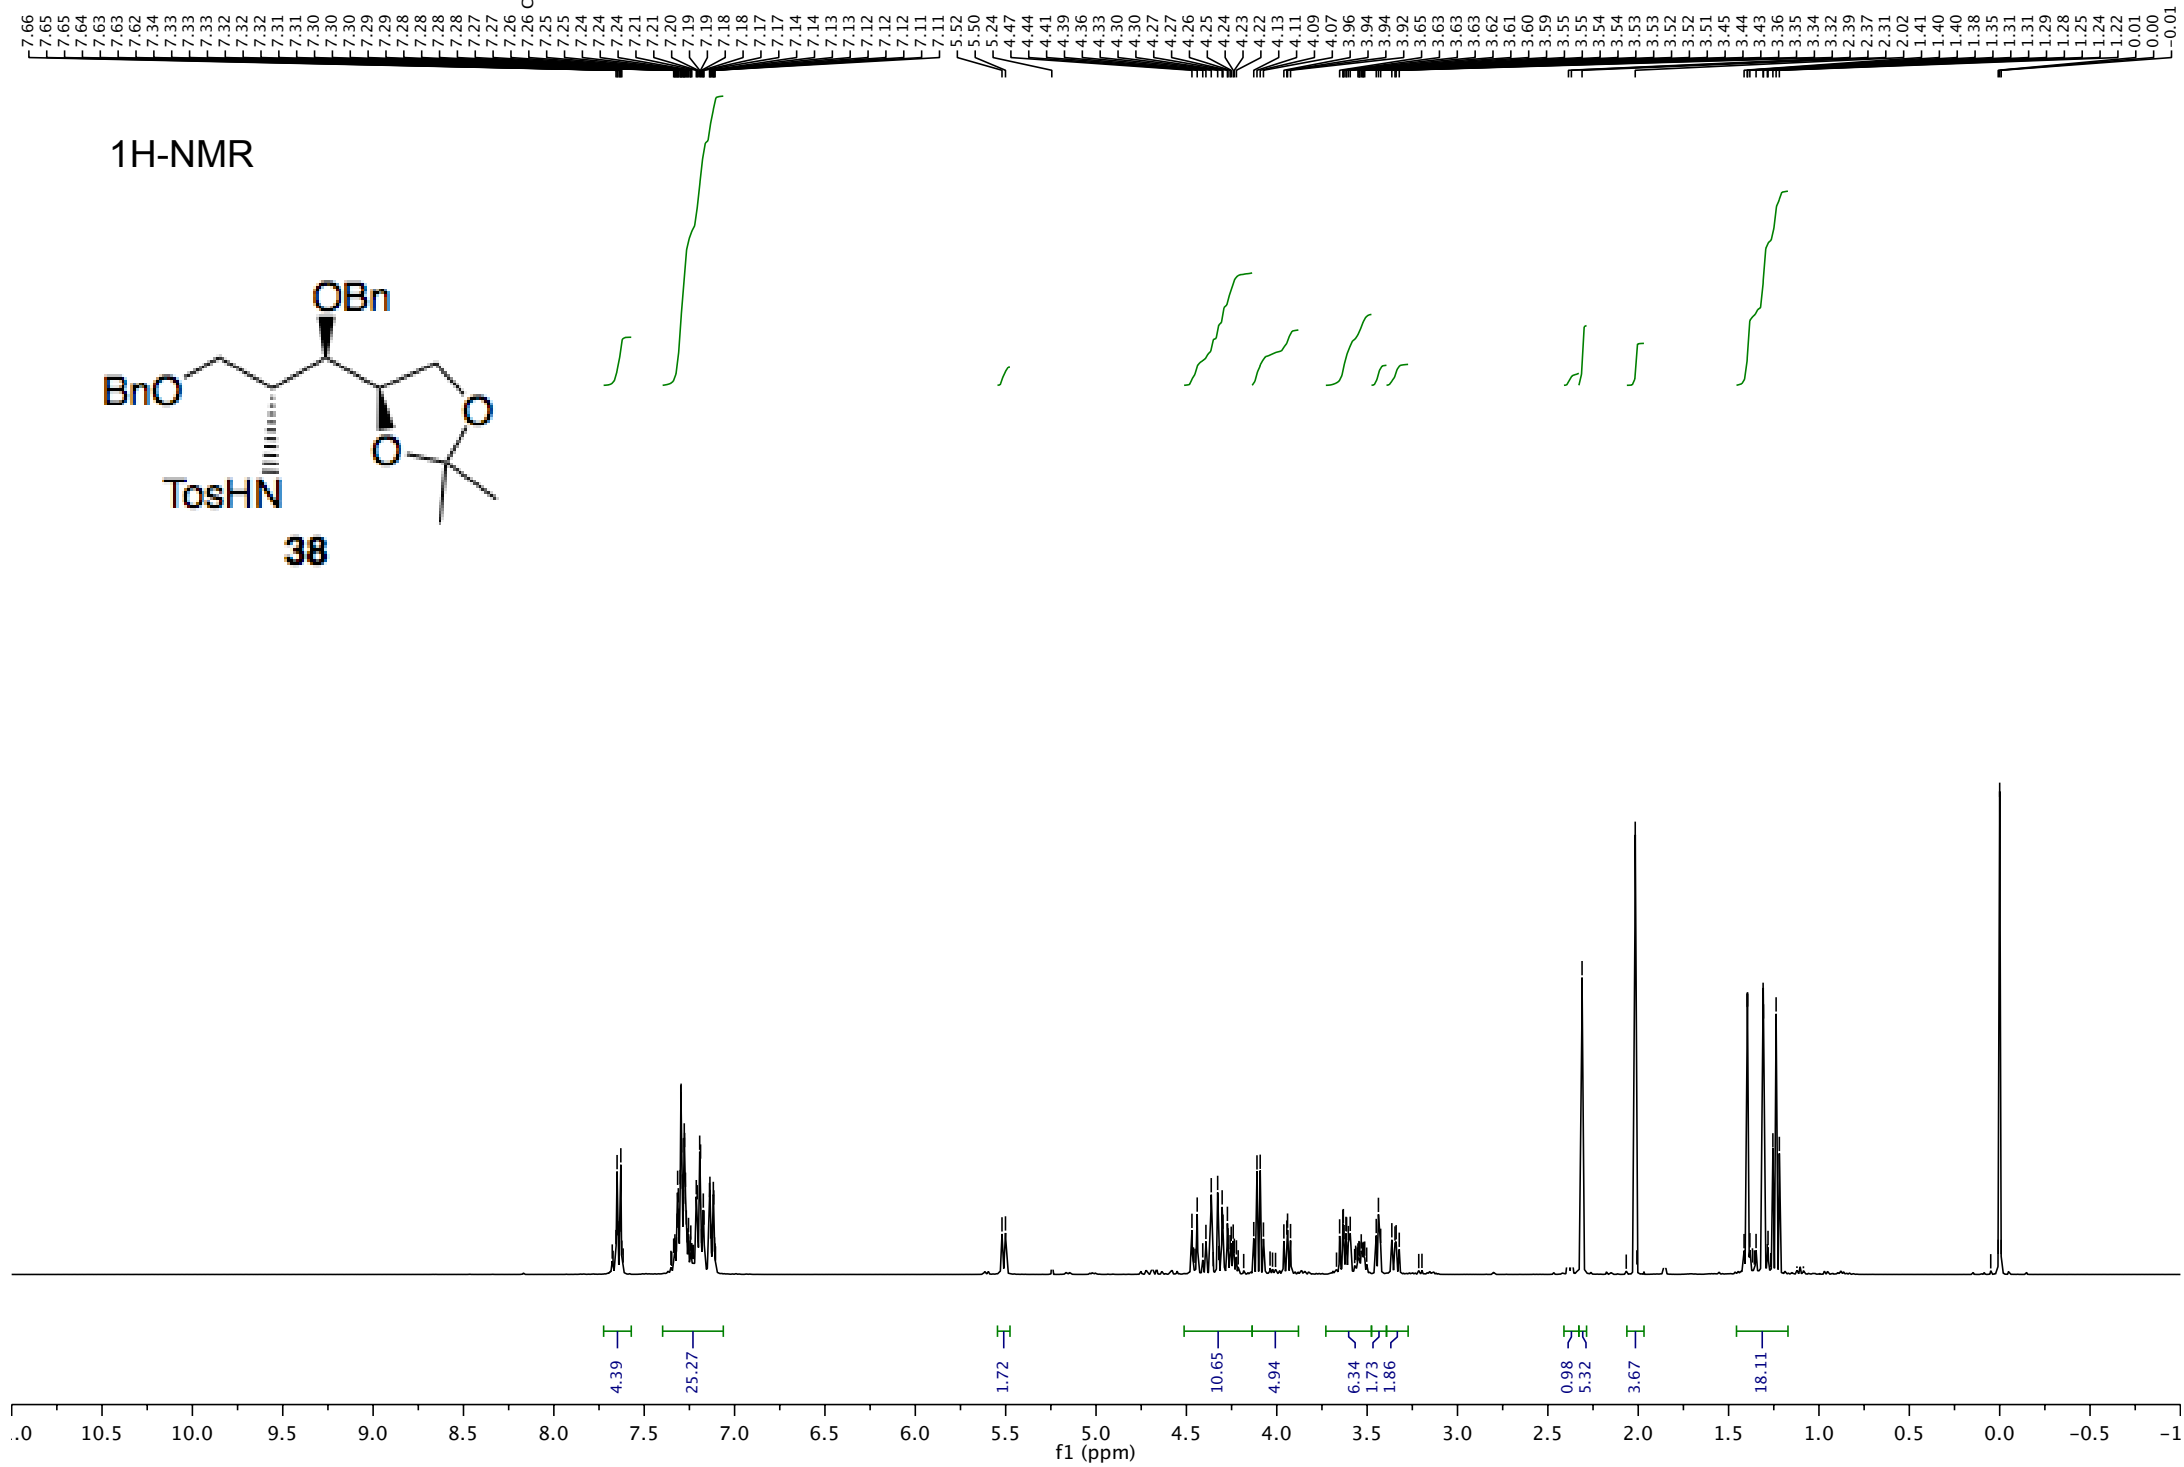



### 13C-NMR

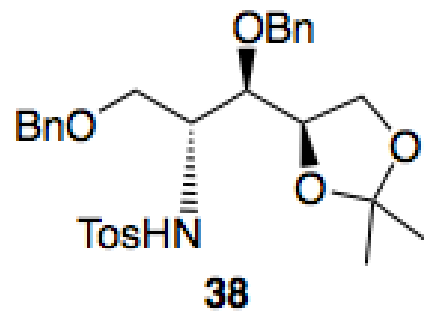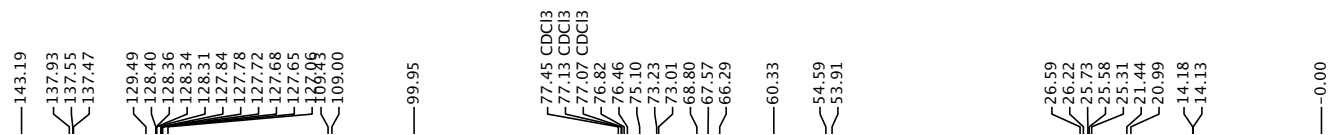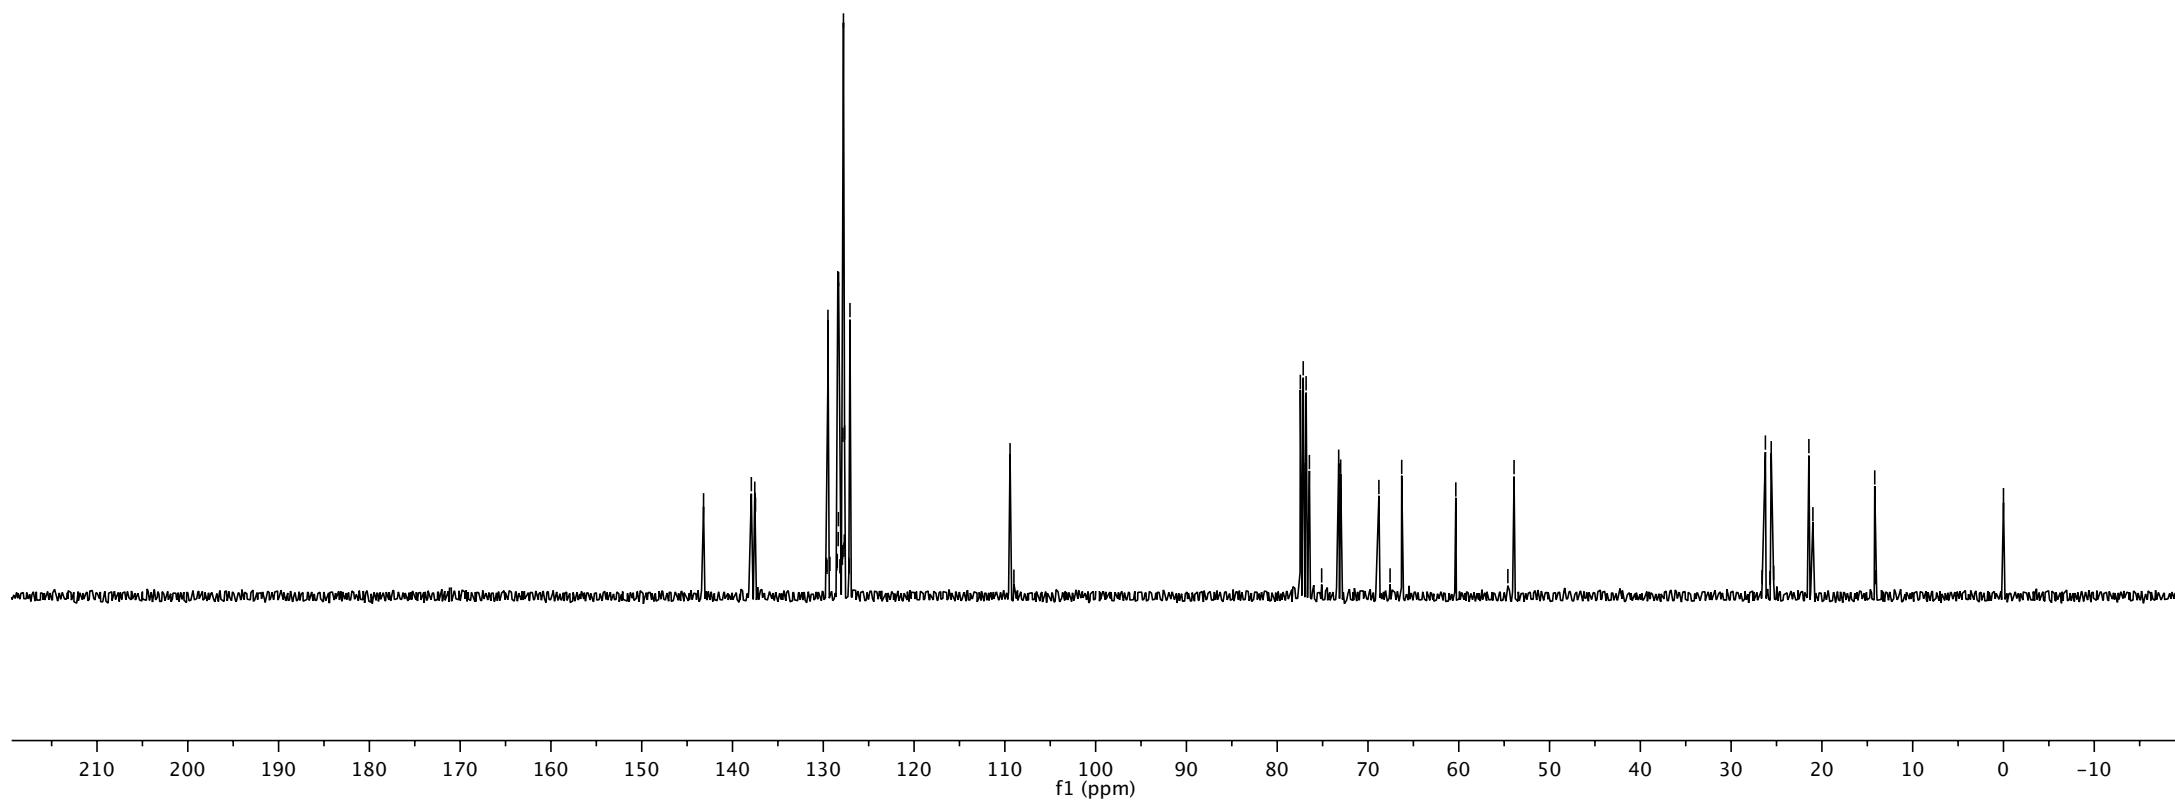

1H-NMR

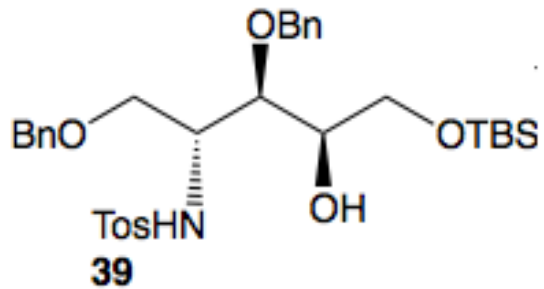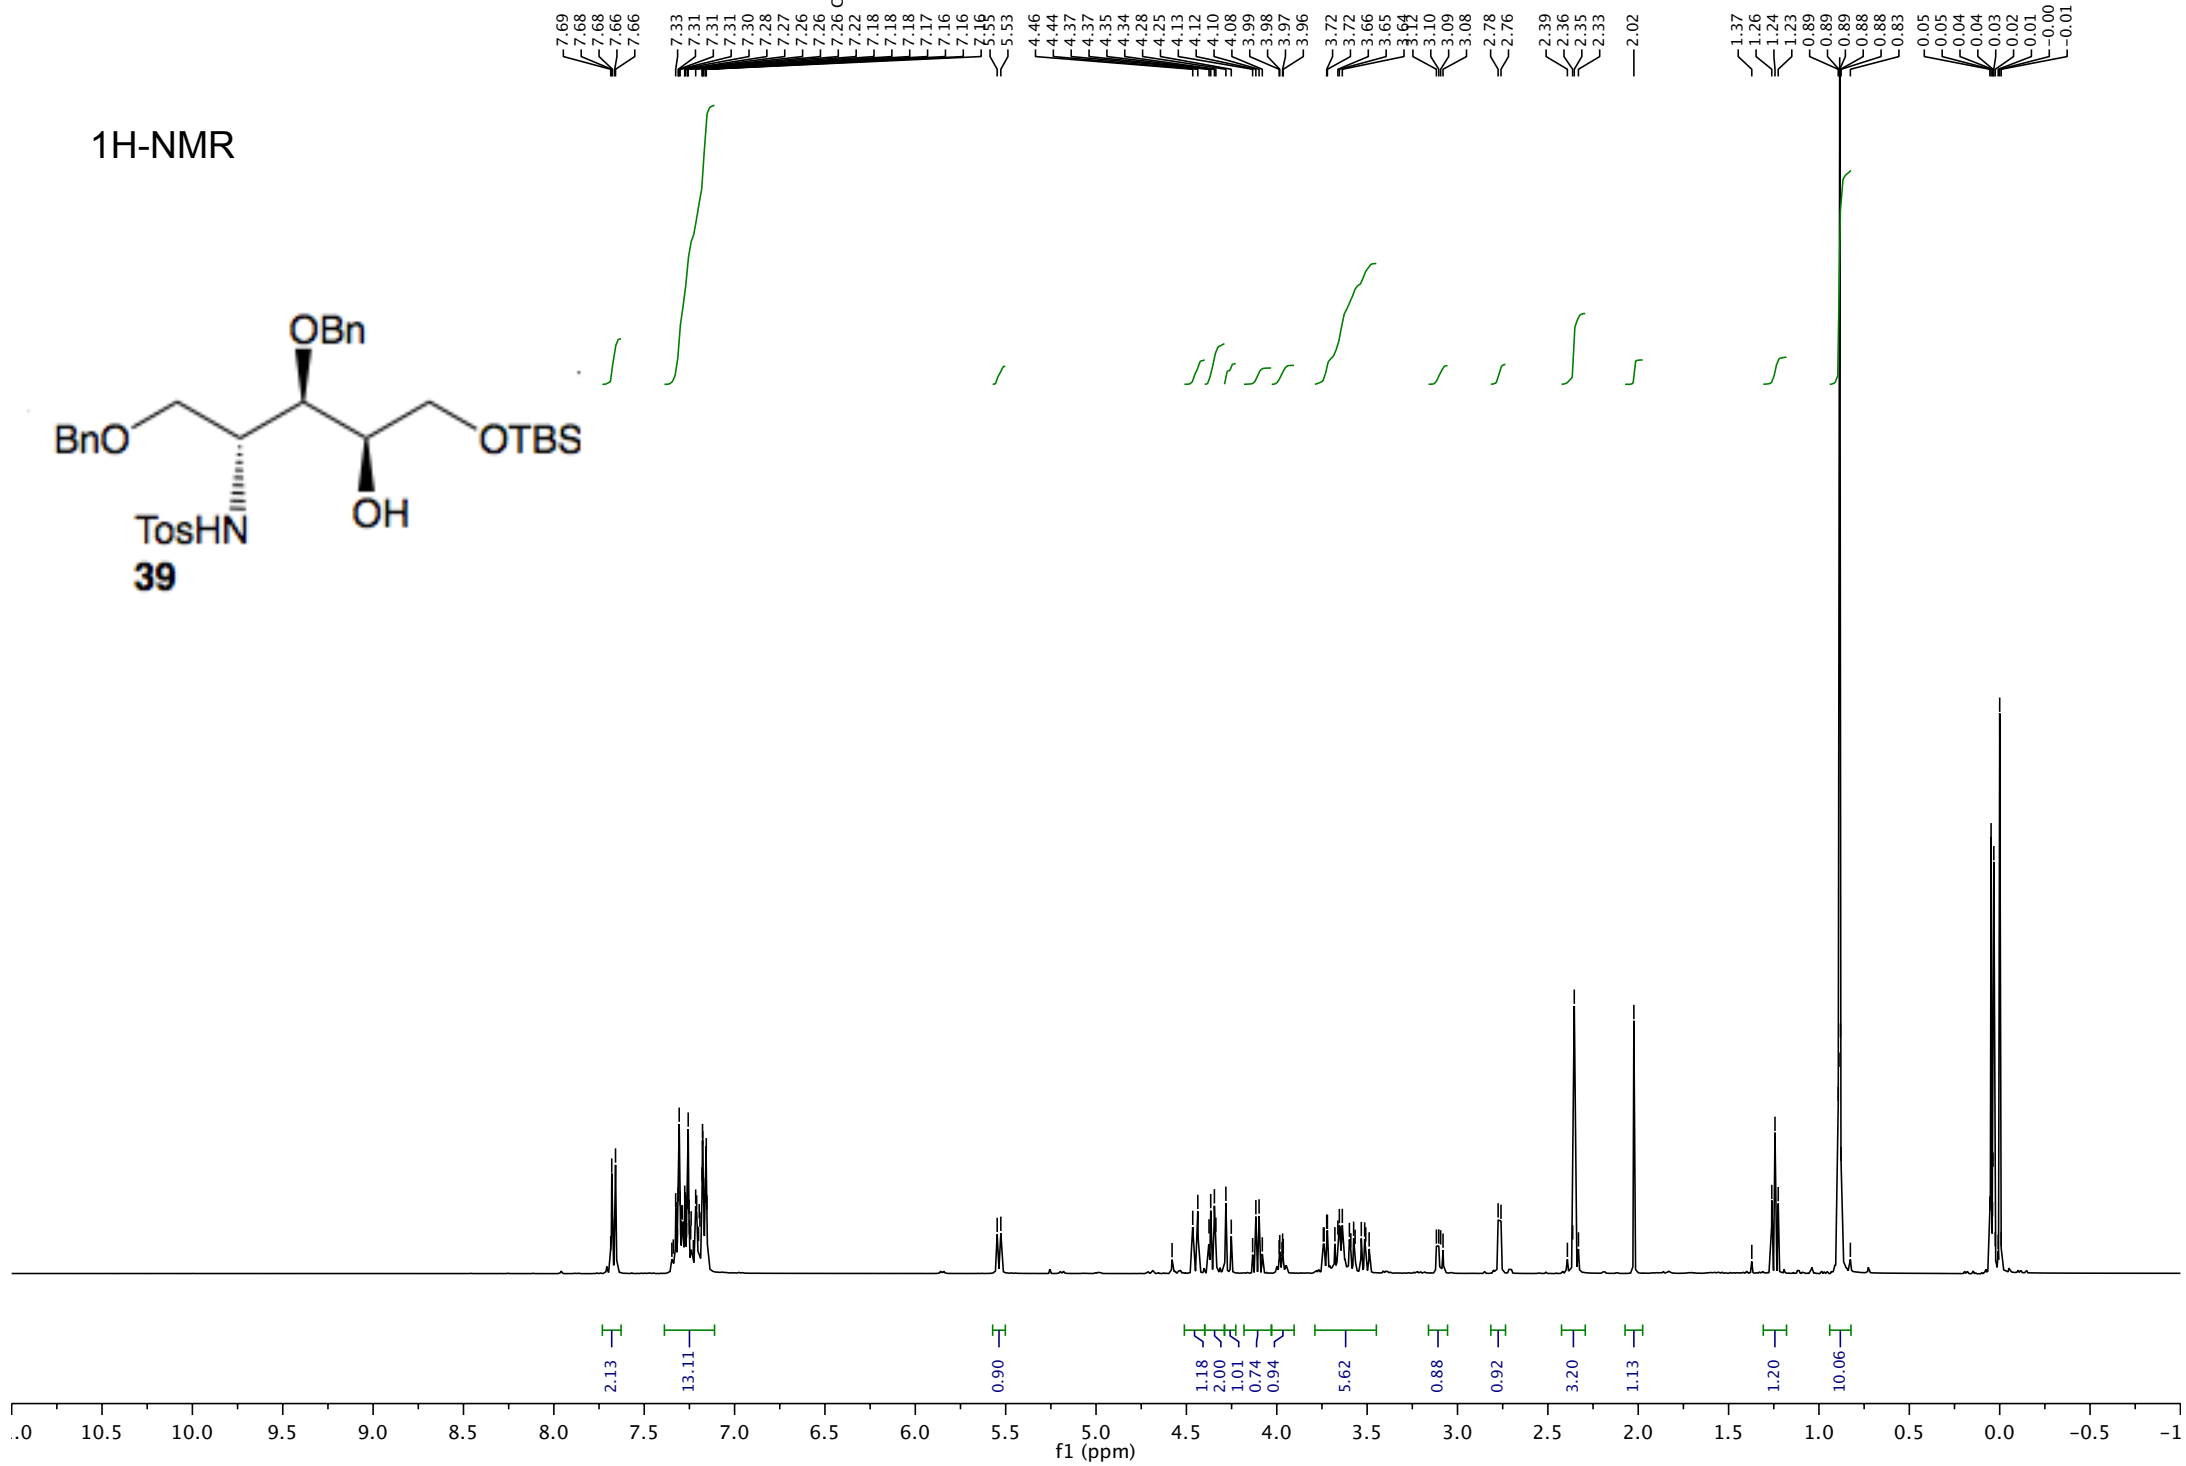



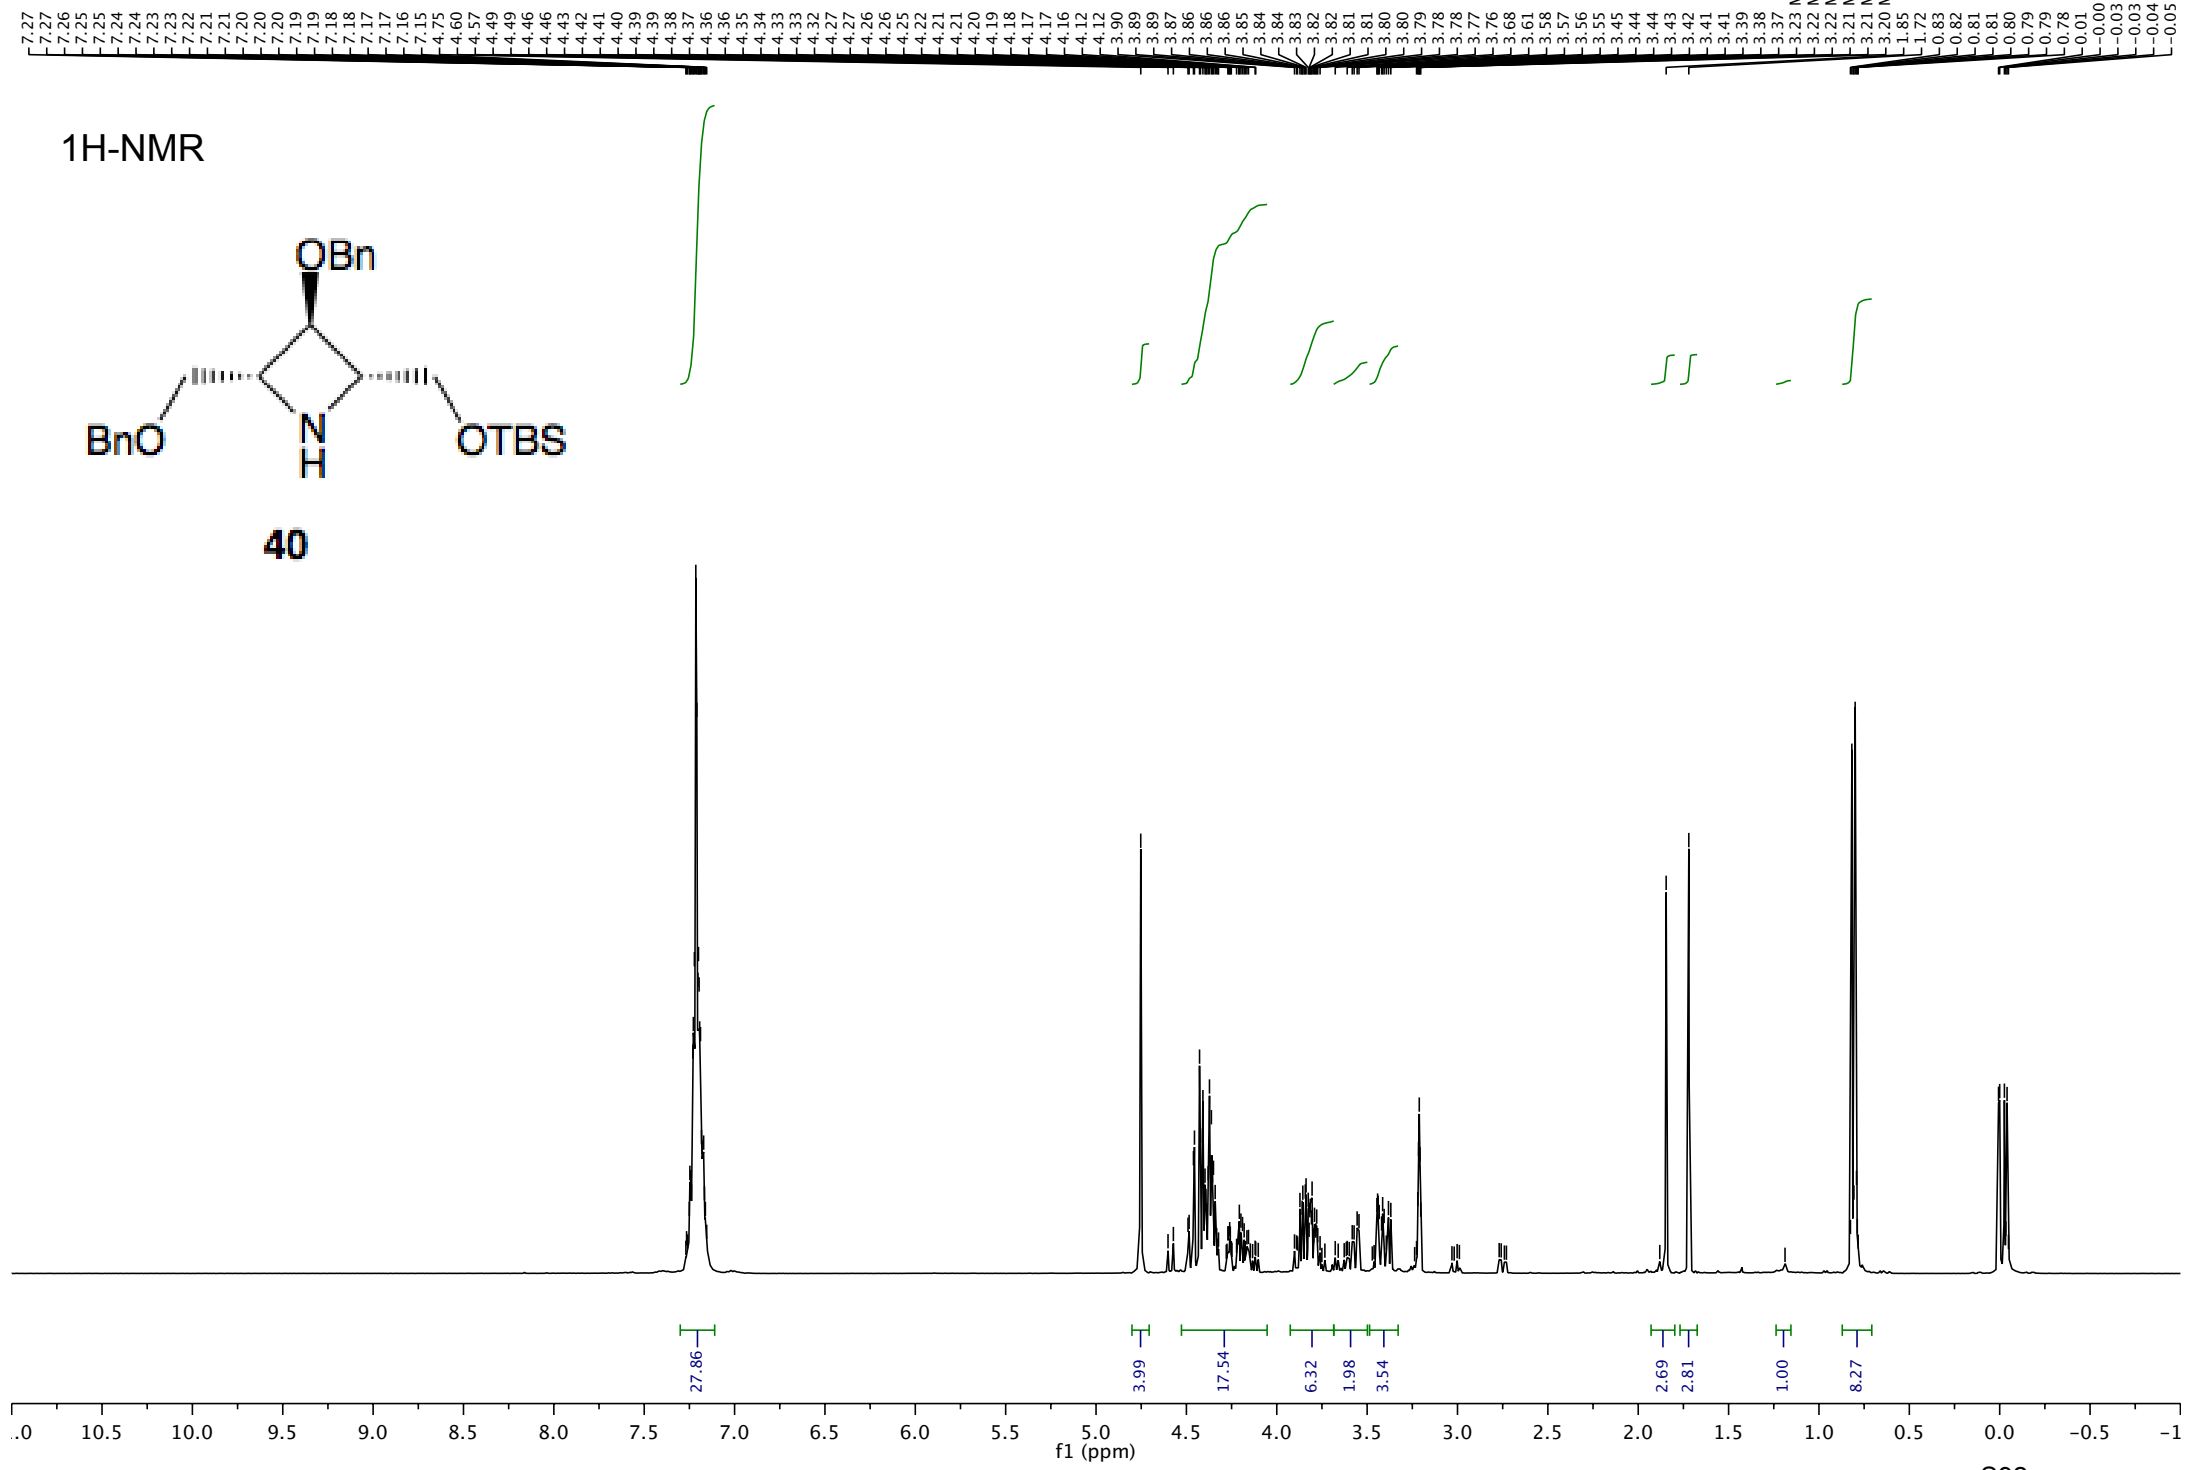

# 13C-NMR

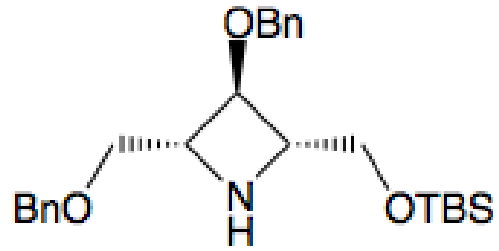

**40**

138.26  
138.16  
137.78  
128.54  
128.42  
128.35  
128.34  
128.31  
127.82  
127.71  
127.68  
127.65  
127.60  
127.53

77.40 CDCl3  
77.08 CDCl3  
76.98 CDCl3  
76.76 CDCl3  
76.43  
73.34  
72.42  
72.45  
72.30  
71.32  
71.10  
66.17  
64.93  
63.93  
62.12  
61.80  
60.71

25.92  
25.87  
20.82  
18.31

-0.00  
-5.36  
-5.38

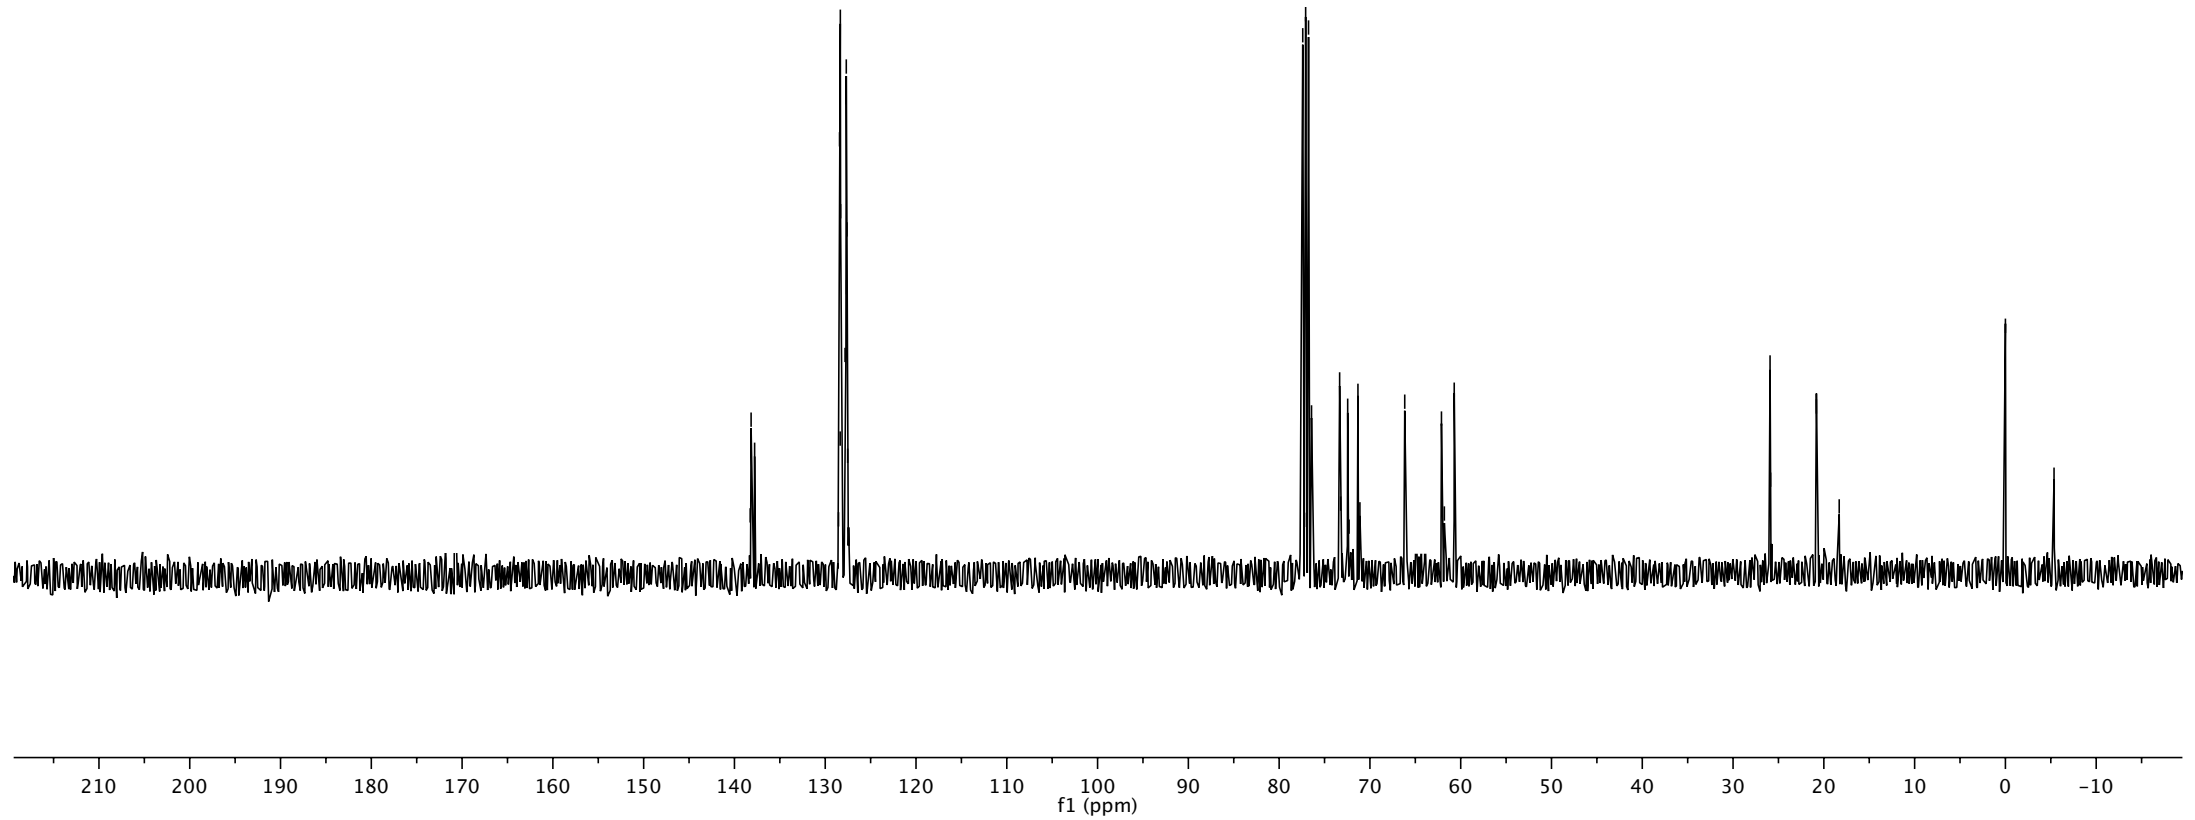

# 1H-NMR

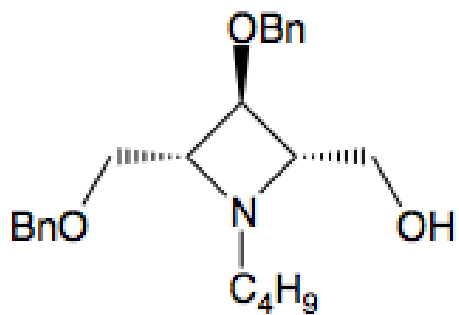

41a

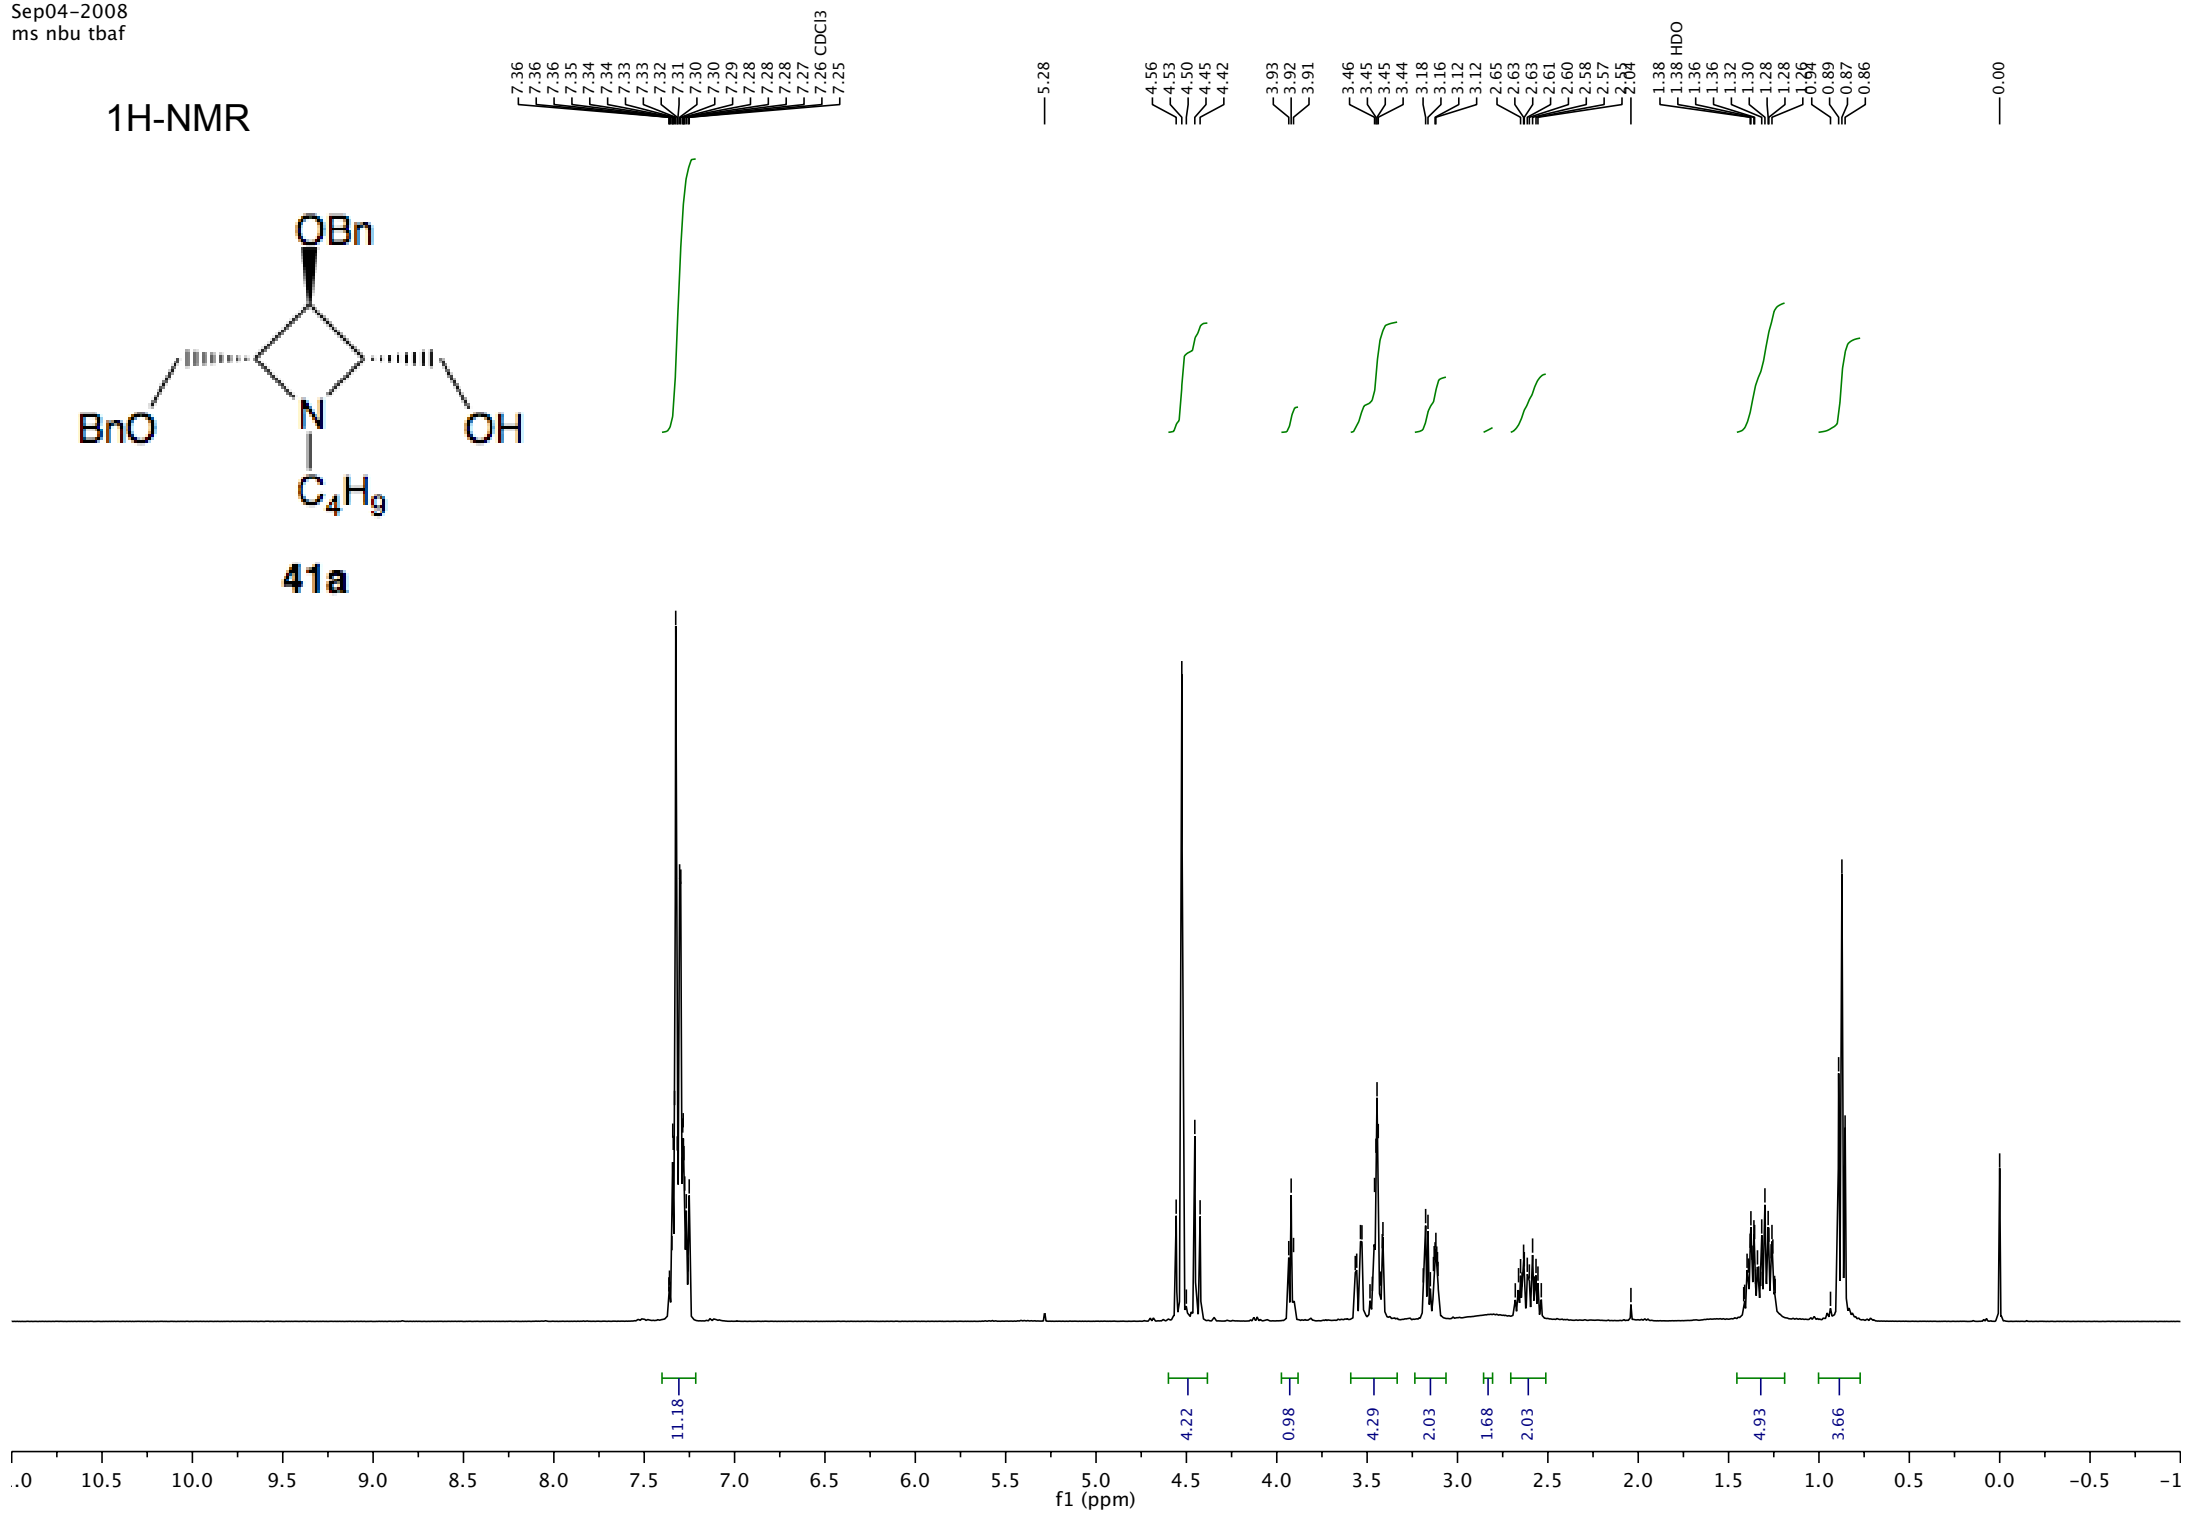

### 13C-NMR

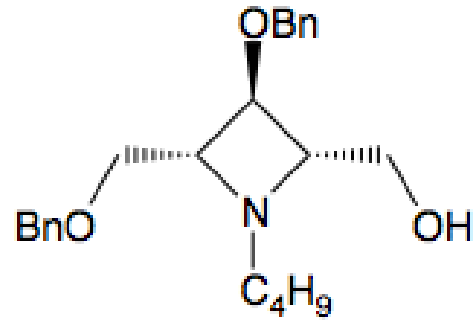

**41a**

138.23  
138.03  
128.42  
128.38  
128.36  
127.83  
127.78  
127.58  
127.53

77.35 CDC13  
77.03 CDC13  
76.71 CDC13  
73.32  
72.60  
71.71  
71.55  
71.20  
69.90  
61.03  
57.62

30.49  
20.49  
13.93

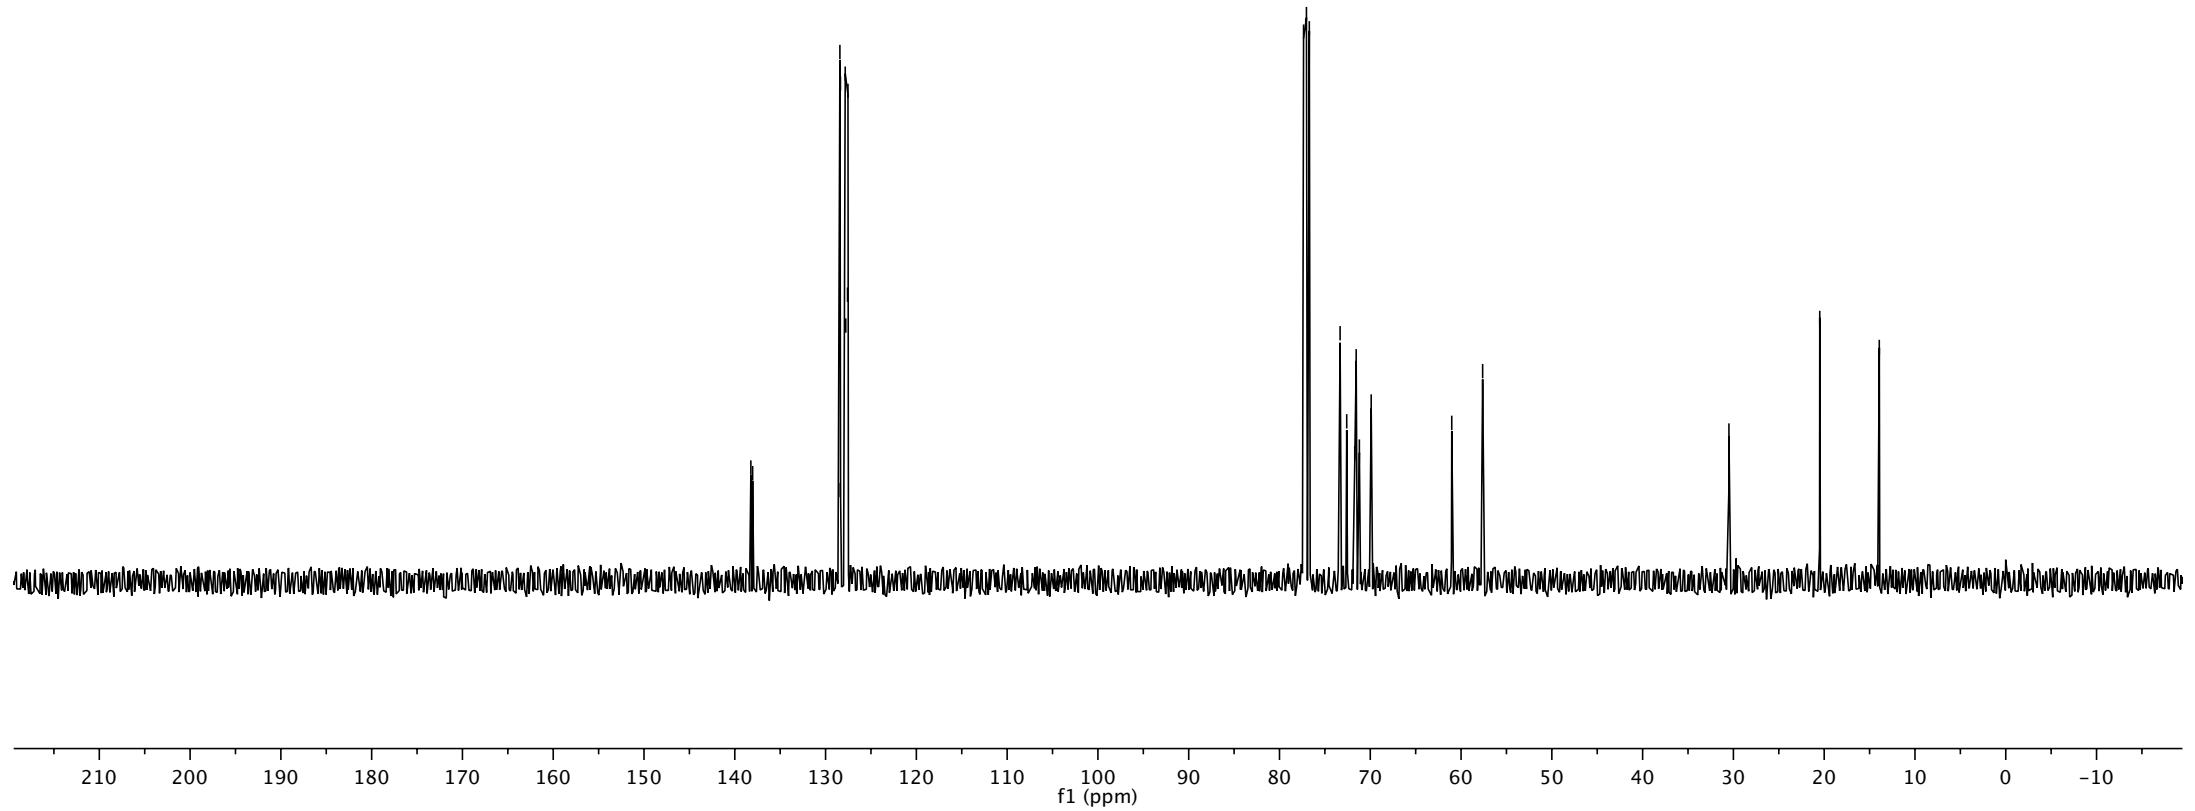

# 1H-NMR

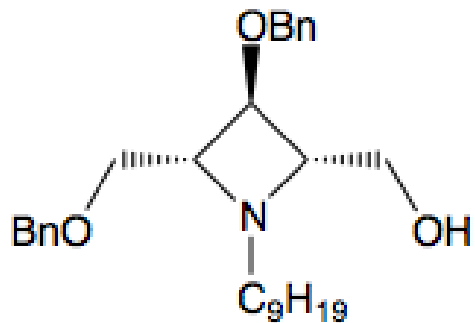

**41b**

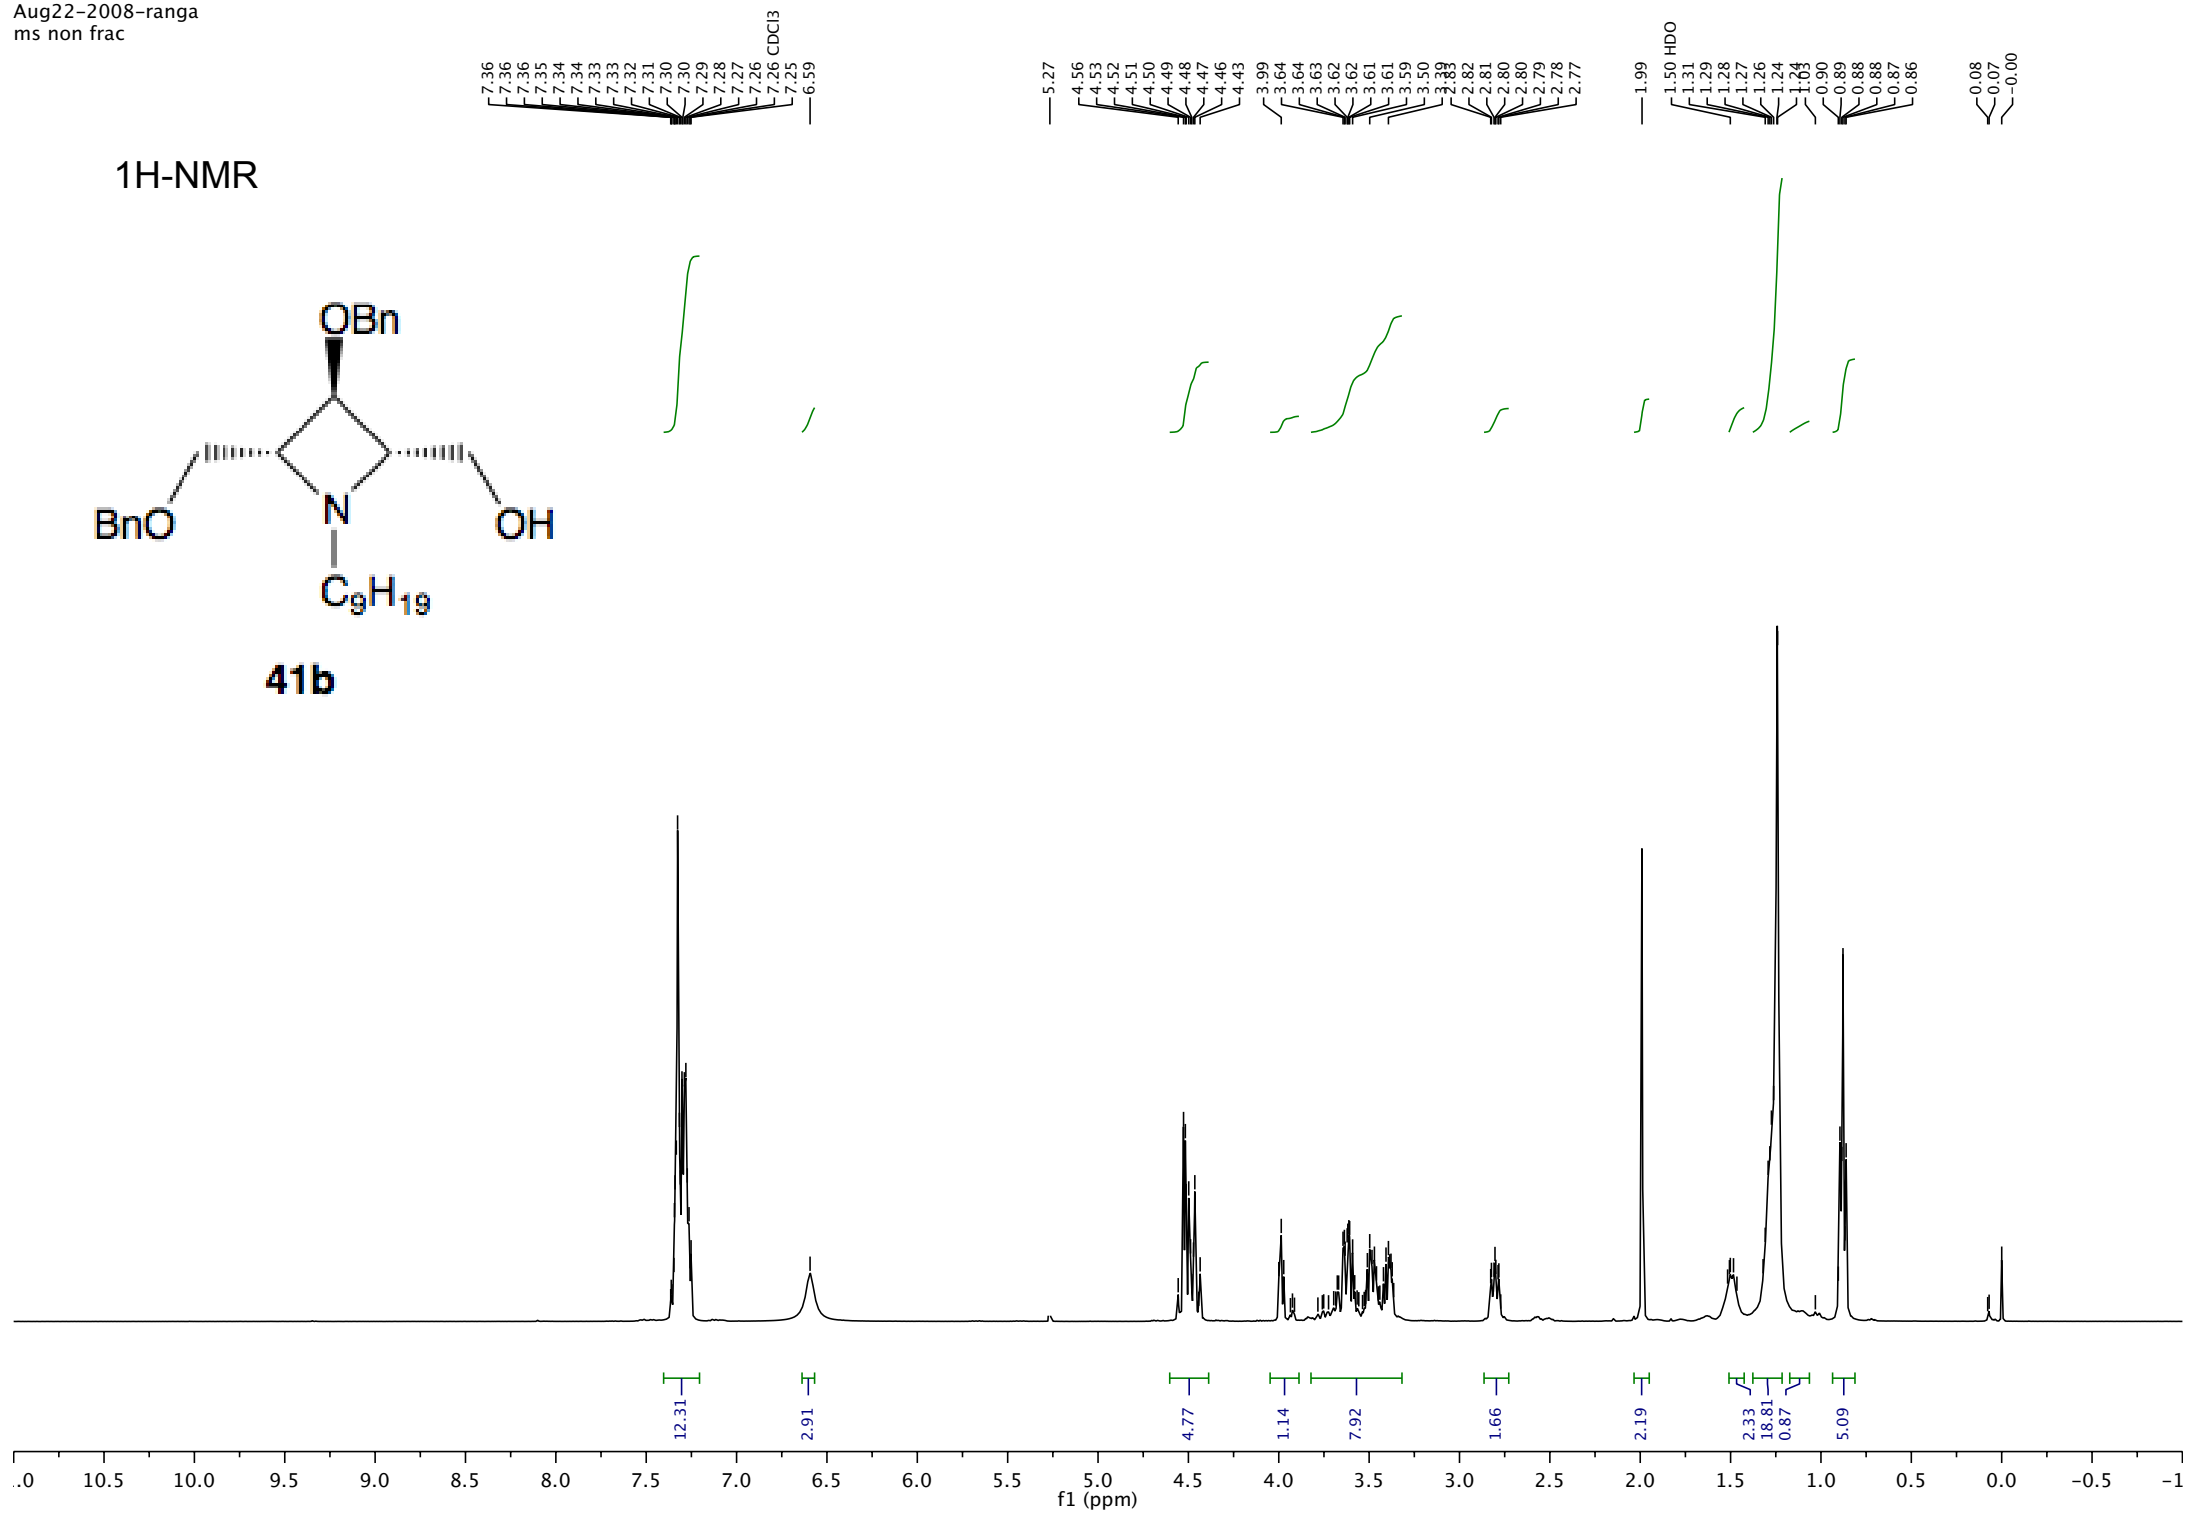



# 13C-NMR

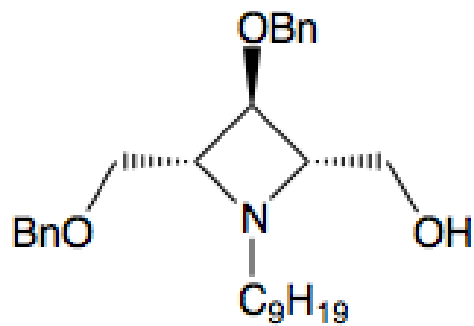

41b

137.91  
137.52  
128.51  
128.43  
128.38  
128.32  
128.02  
127.89  
127.82  
127.69

96.43

77.37 CDCl<sub>3</sub>  
77.05 CDCl<sub>3</sub>  
76.73 CDCl<sub>3</sub>  
73.42  
72.74  
71.91  
71.60  
70.64  
69.90

60.36  
58.19

31.83  
29.46  
29.30  
29.22  
27.12  
26.81  
22.66  
22.49  
21.04  
14.19  
14.11

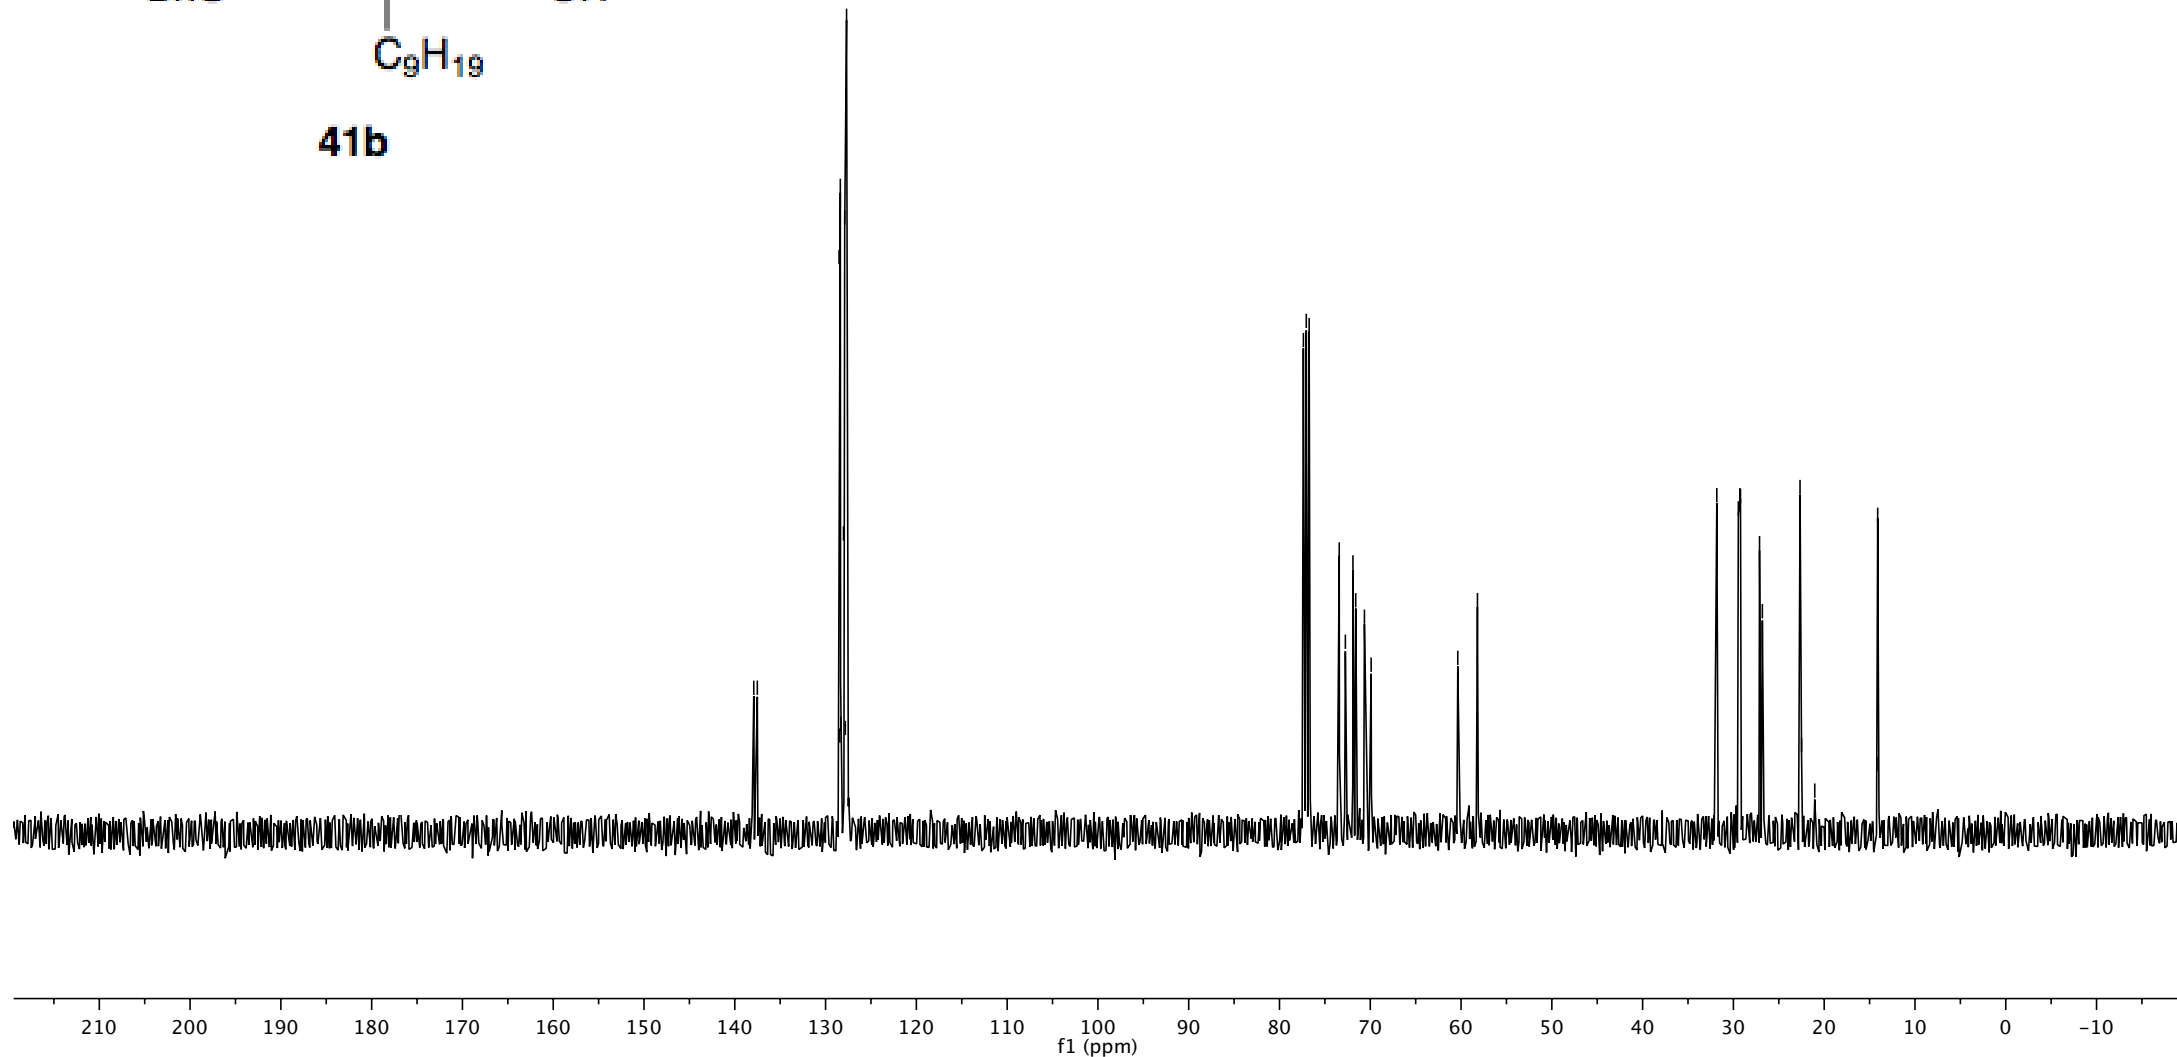

# 1H-NMR

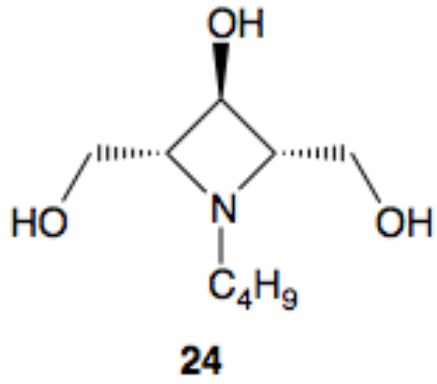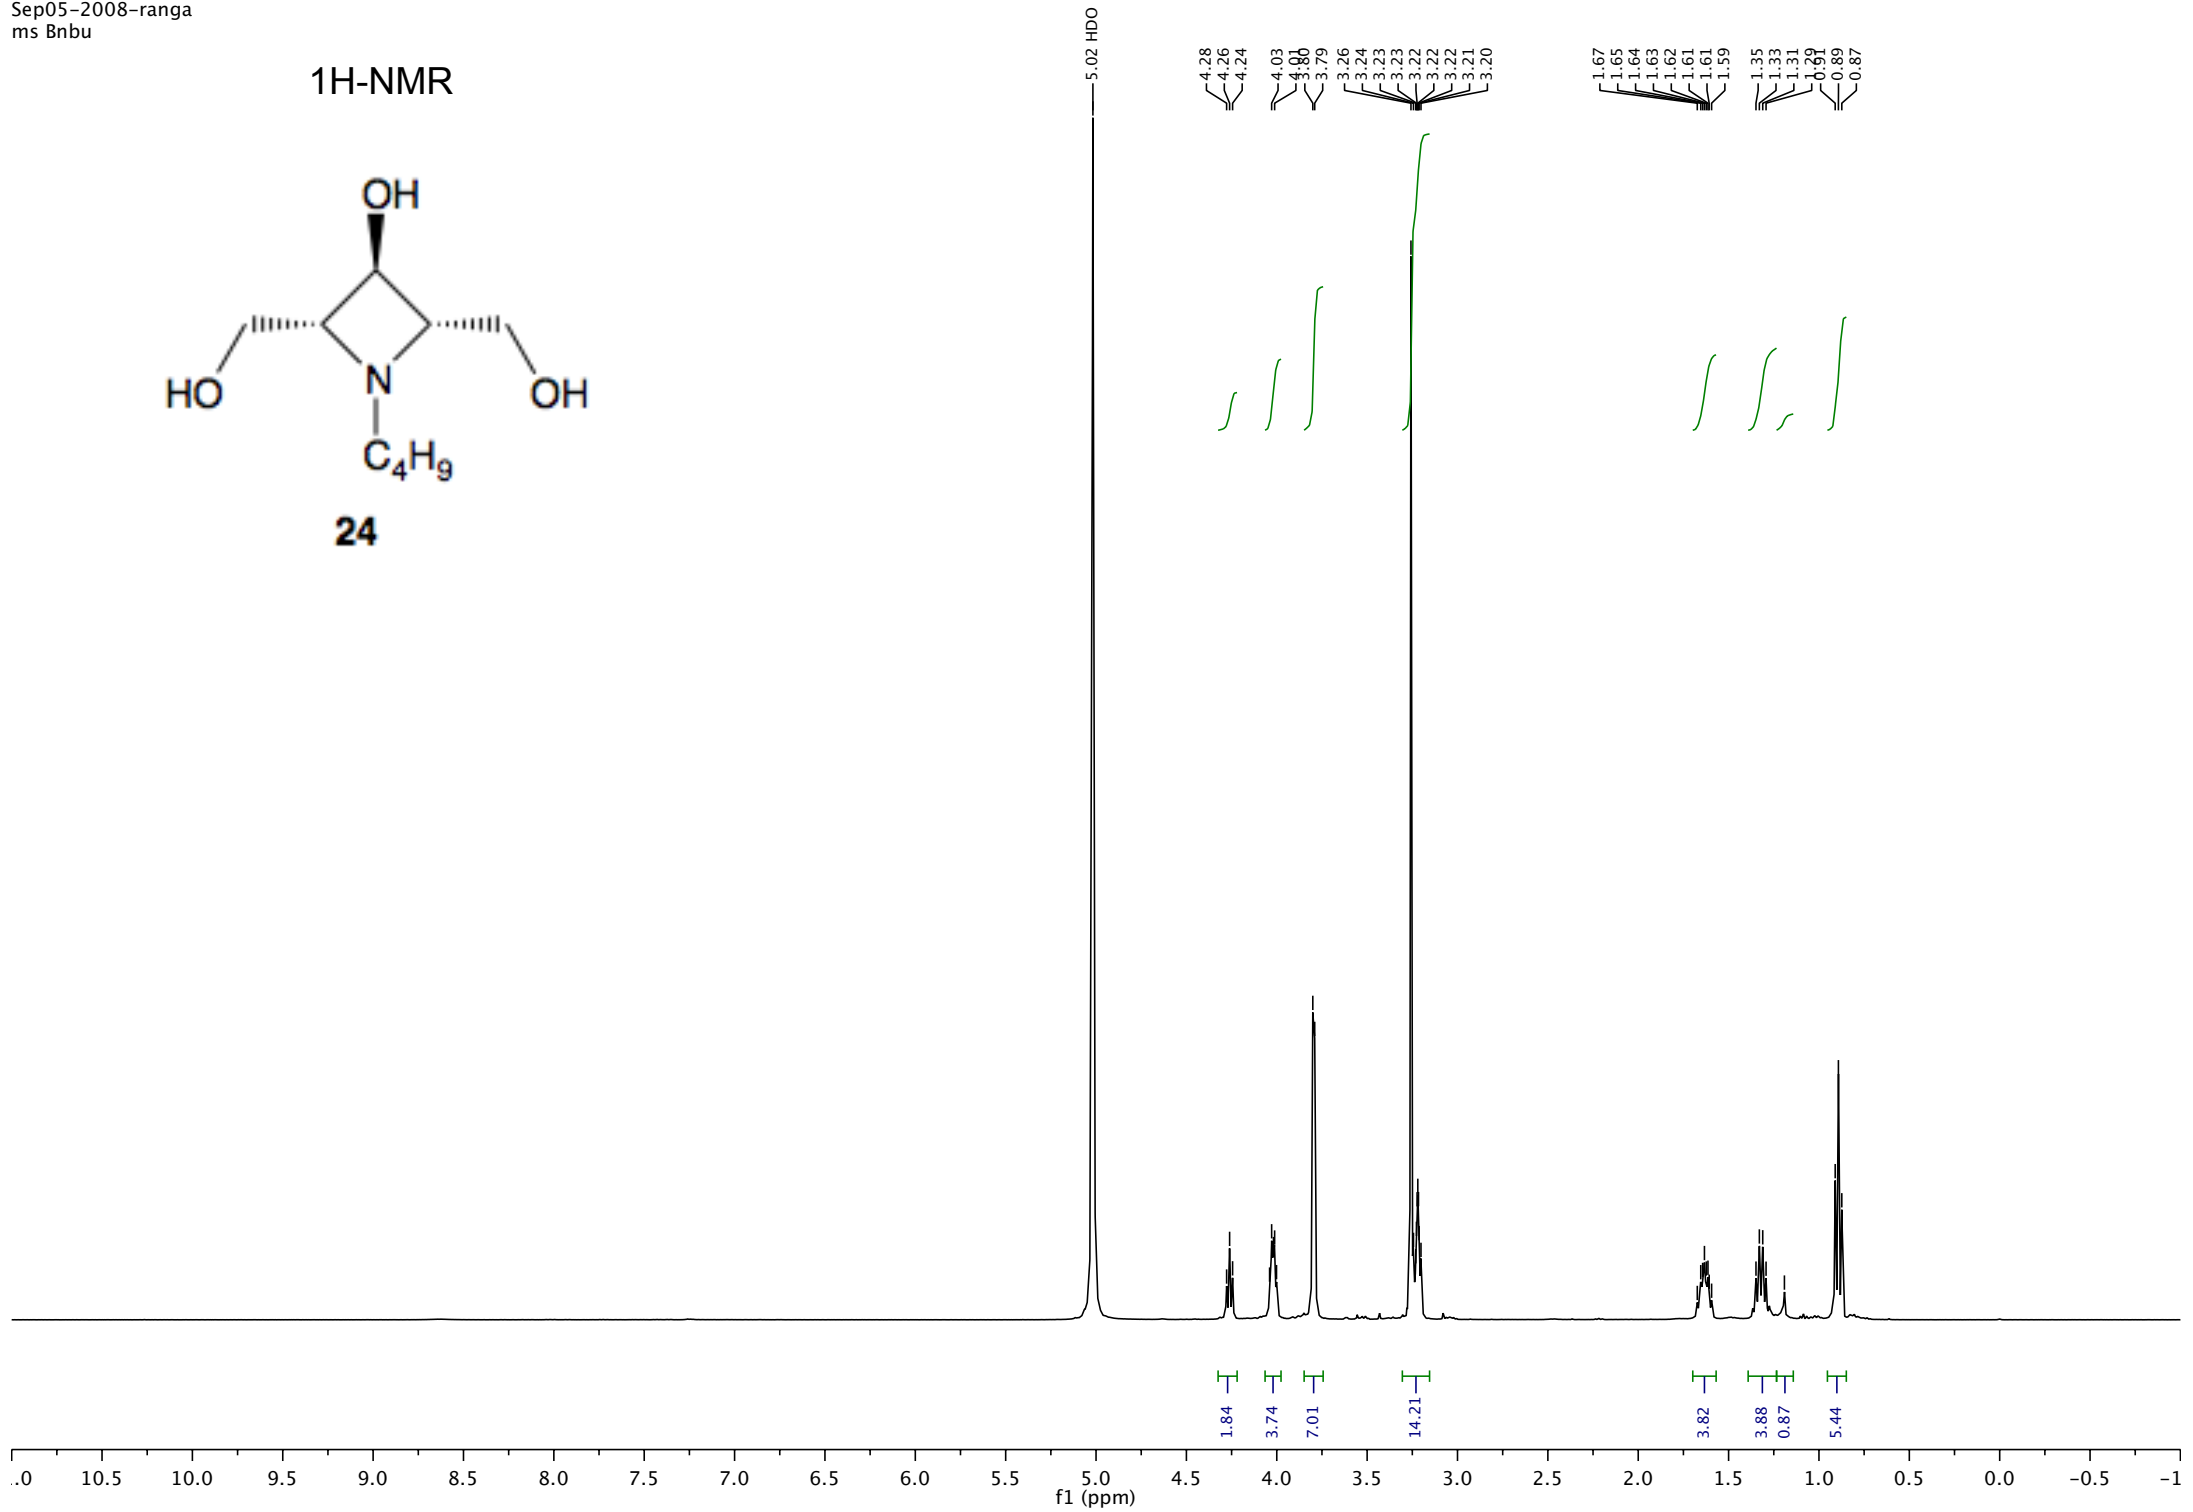

# 13C-NMR

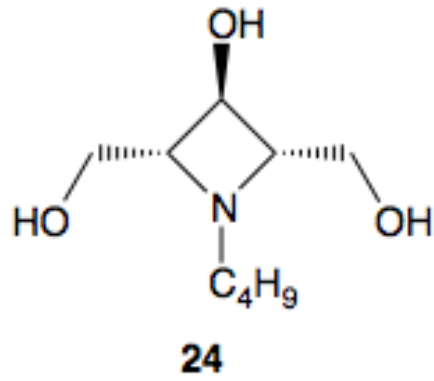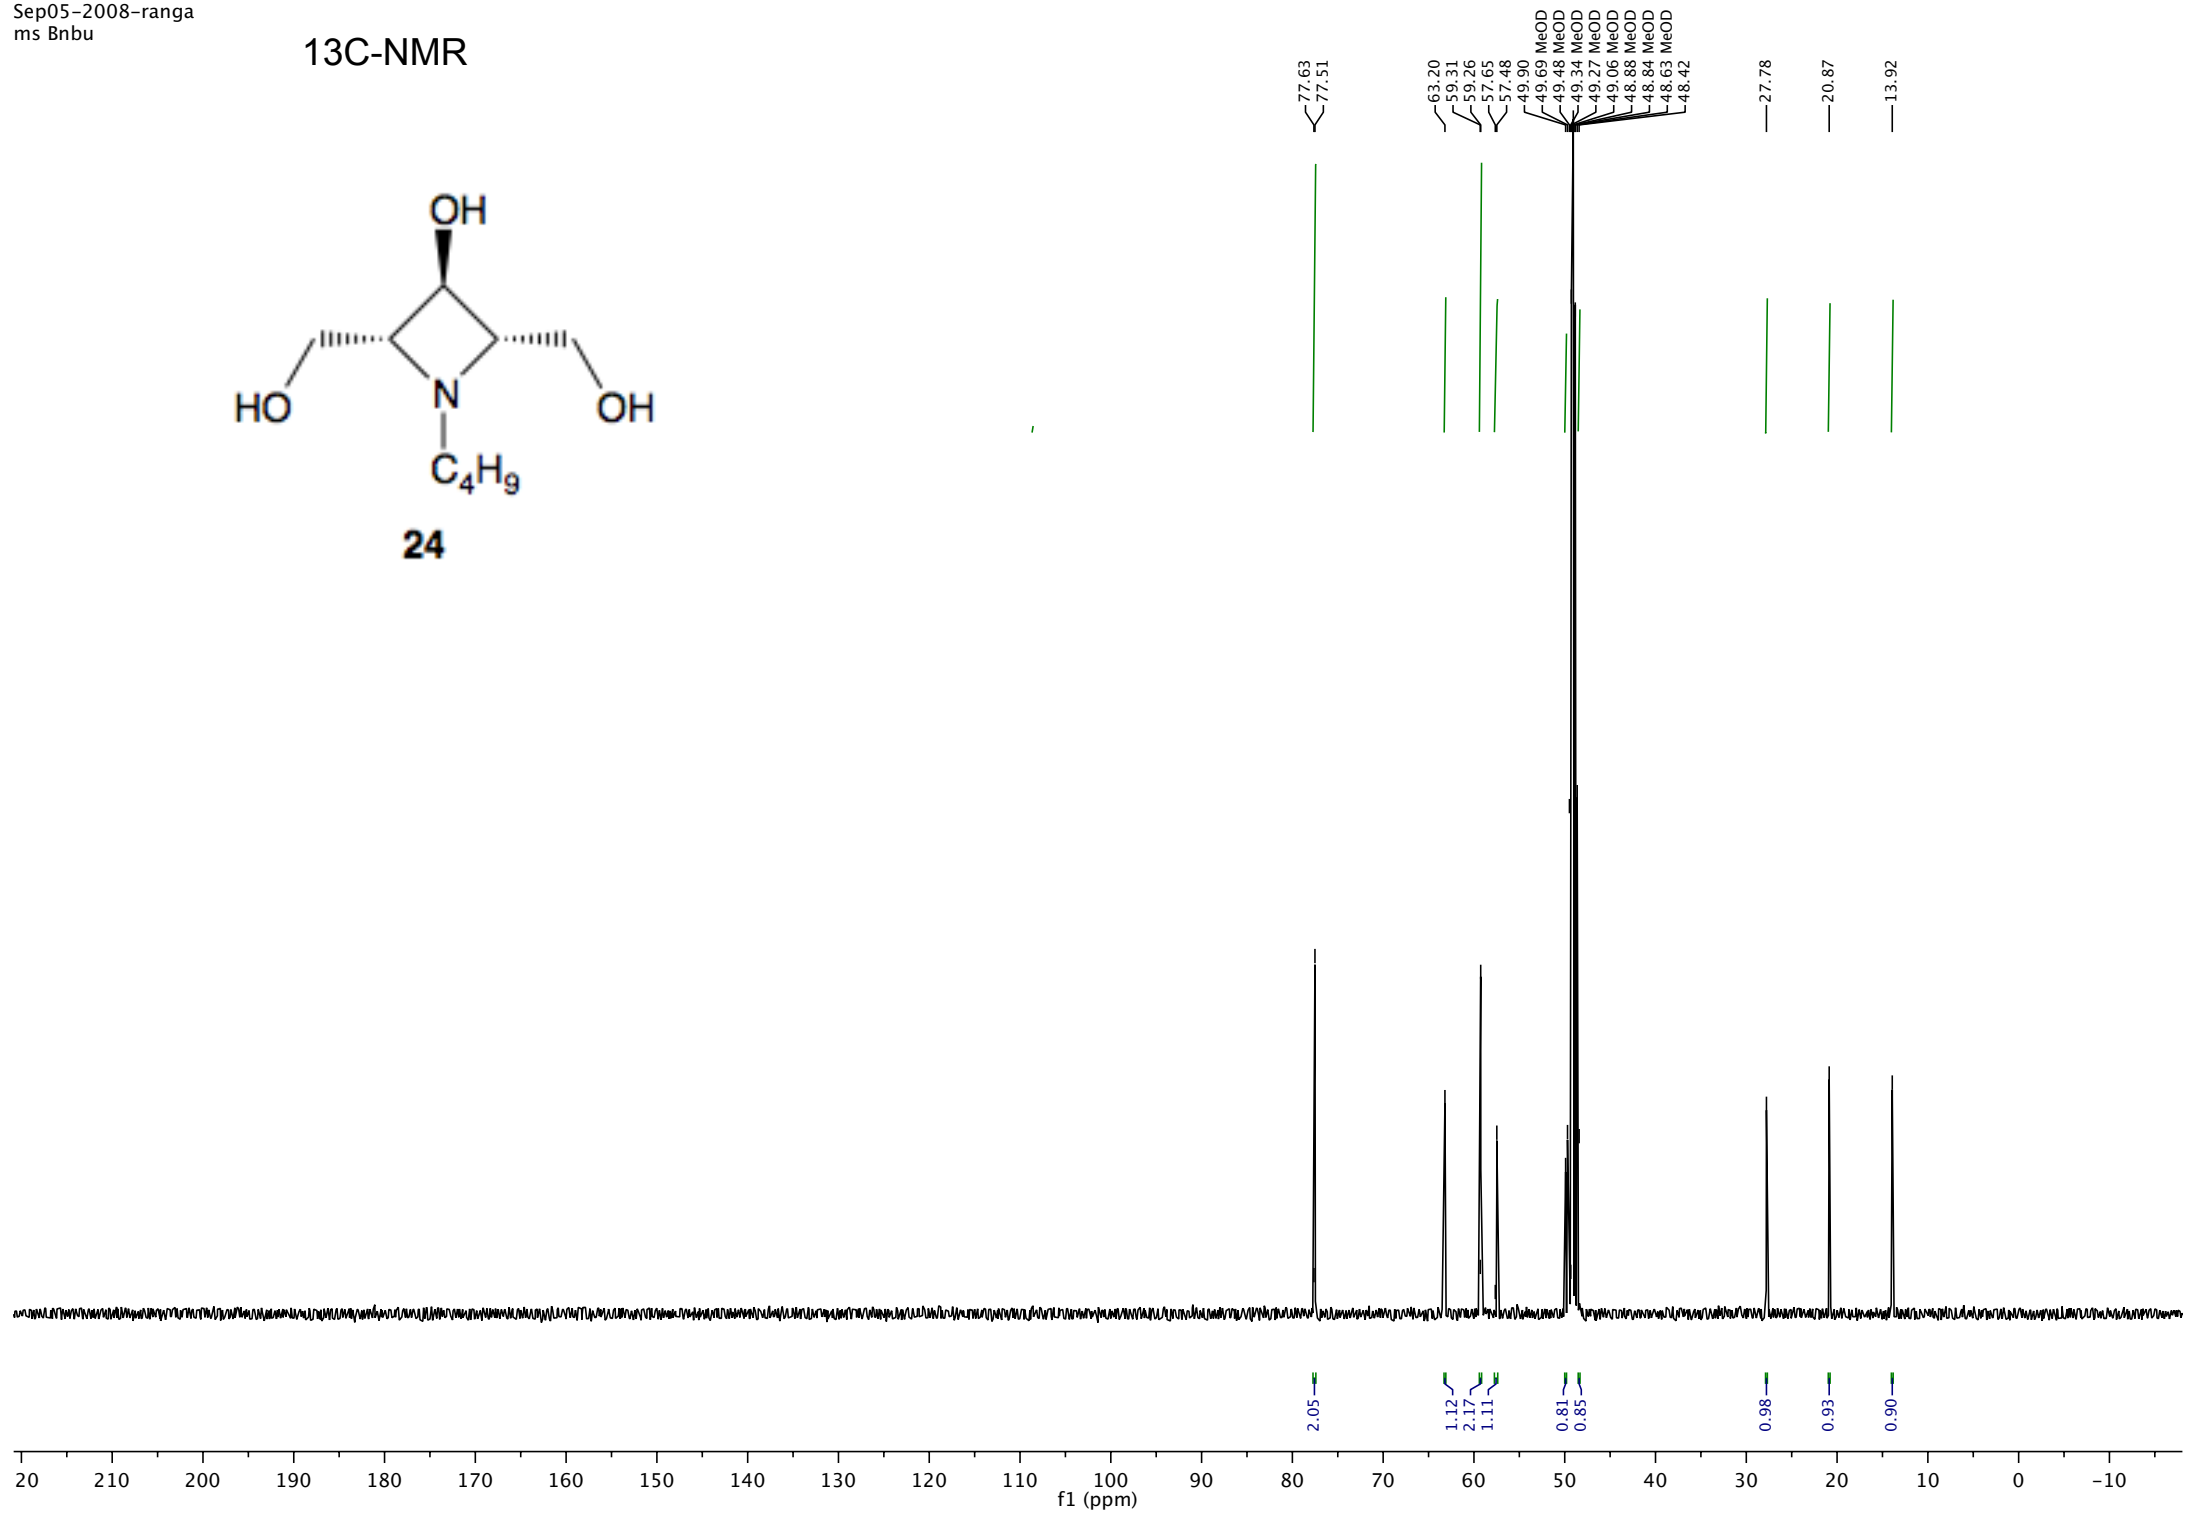

# 1H-NMR

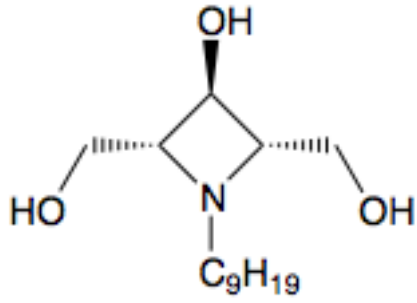

25

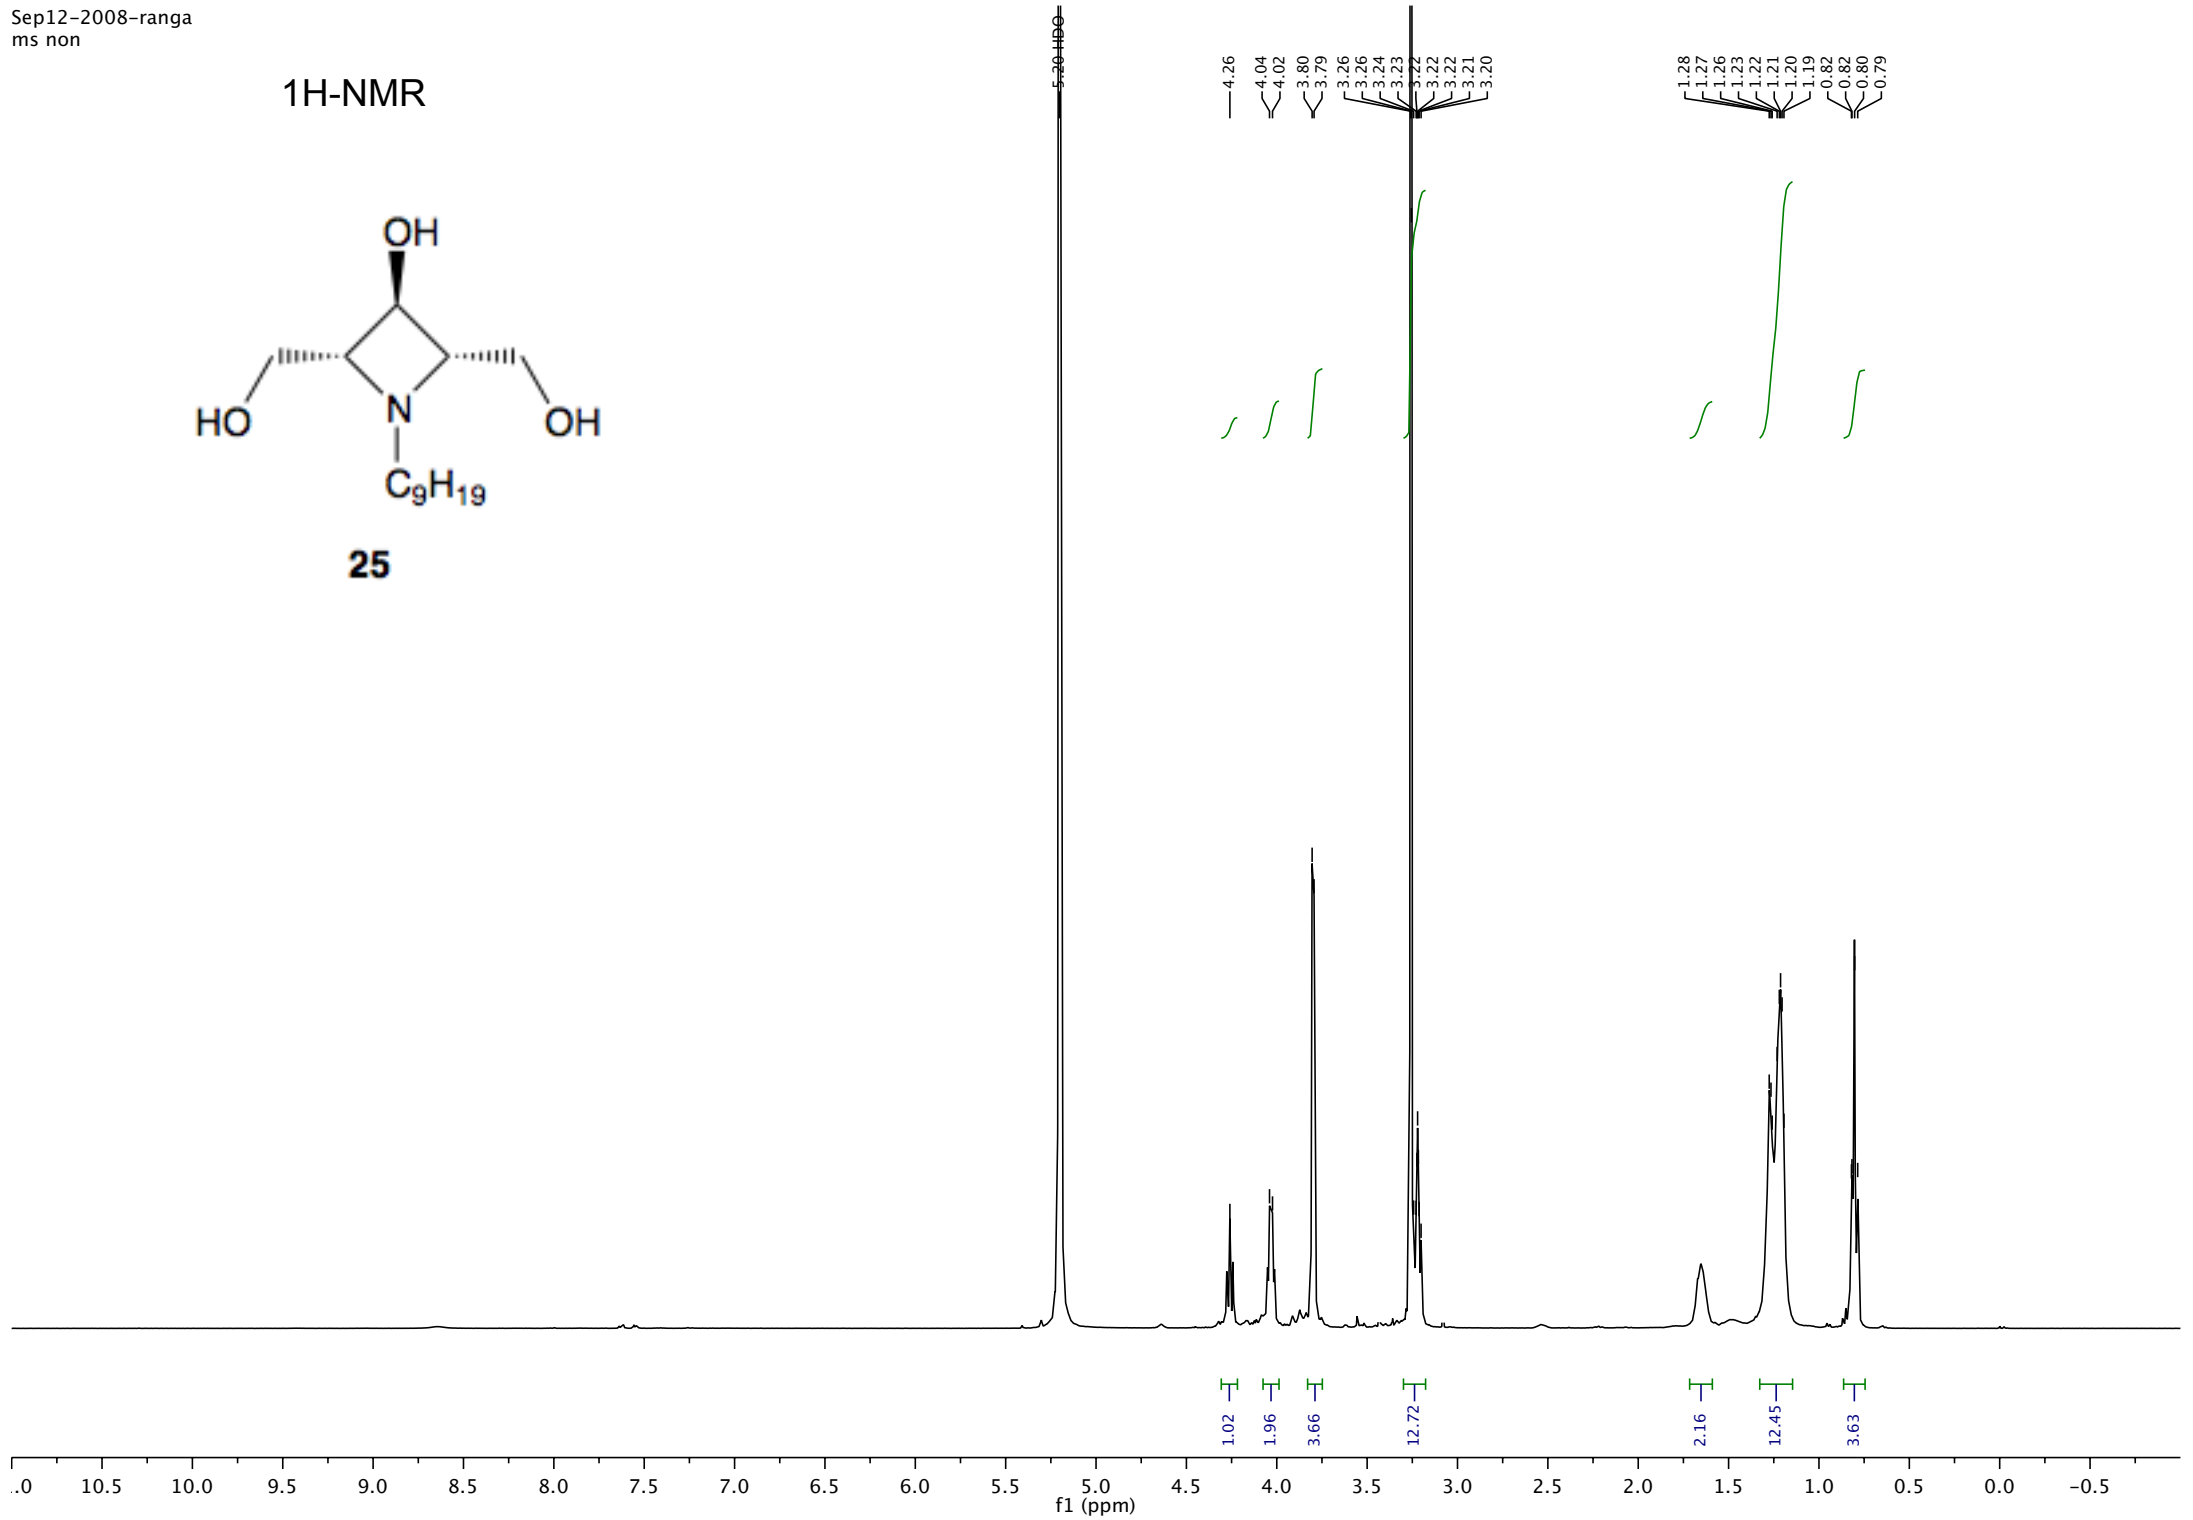

# 13C-NMR

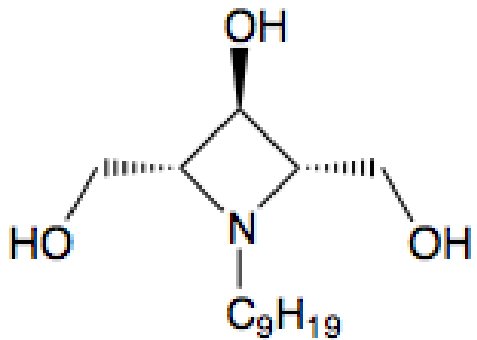

25

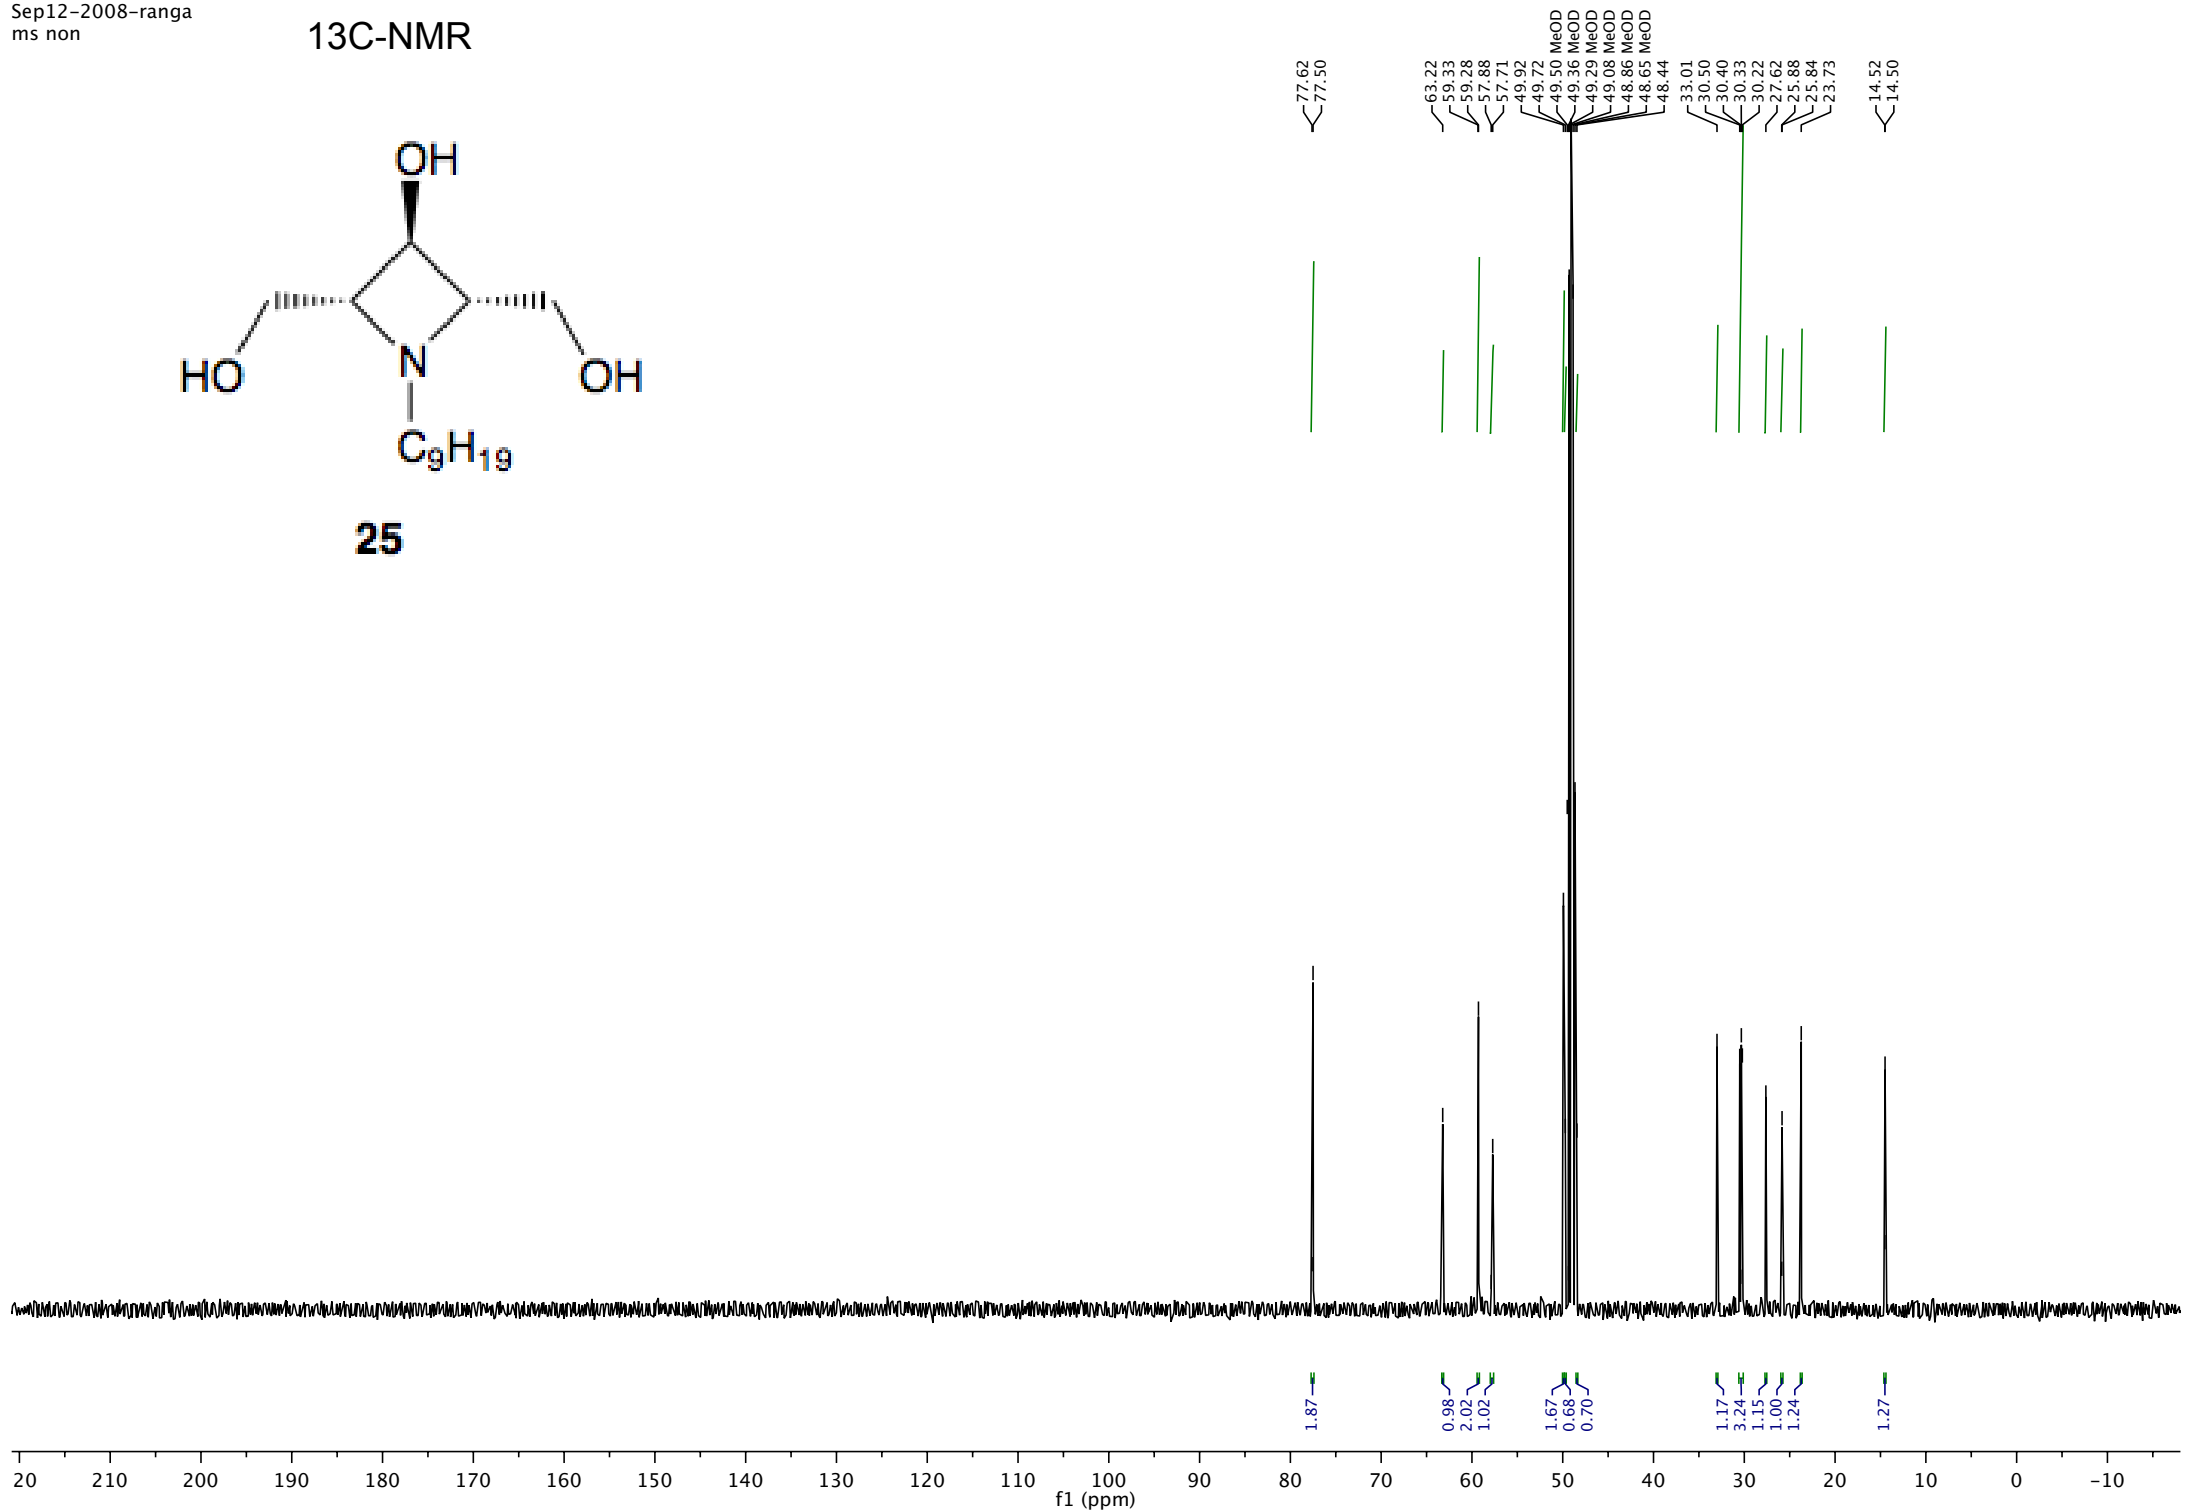

# 1H-NMR

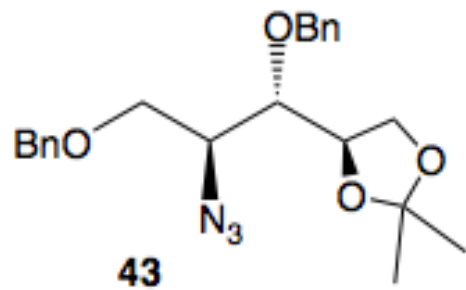

7.38  
7.37  
7.36  
7.35  
7.35  
7.35  
7.34 CDCl3  
7.33  
7.32  
7.31  
7.30  
7.29  
7.29  
7.28  
7.28  
7.27  
7.25  
4.71  
4.68  
4.65  
4.62  
4.59  
4.57  
4.56  
4.55  
4.55  
4.52  
4.19  
4.18  
4.16  
4.15  
4.05  
4.03  
4.02  
4.01  
3.90  
3.89  
3.88  
3.87  
3.86  
3.86  
3.85  
3.85  
3.84  
3.75  
3.74  
3.72  
3.71  
3.70  
3.68  
3.67  
3.67  
3.66  
3.65  
2.64 H2O  
1.58 H2O  
1.46  
1.45  
1.42  
1.39  
1.39  
1.37  
1.37  
1.36  
1.36  
1.33  
1.25  
0.15  
0.01  
-0.01  
-0.15

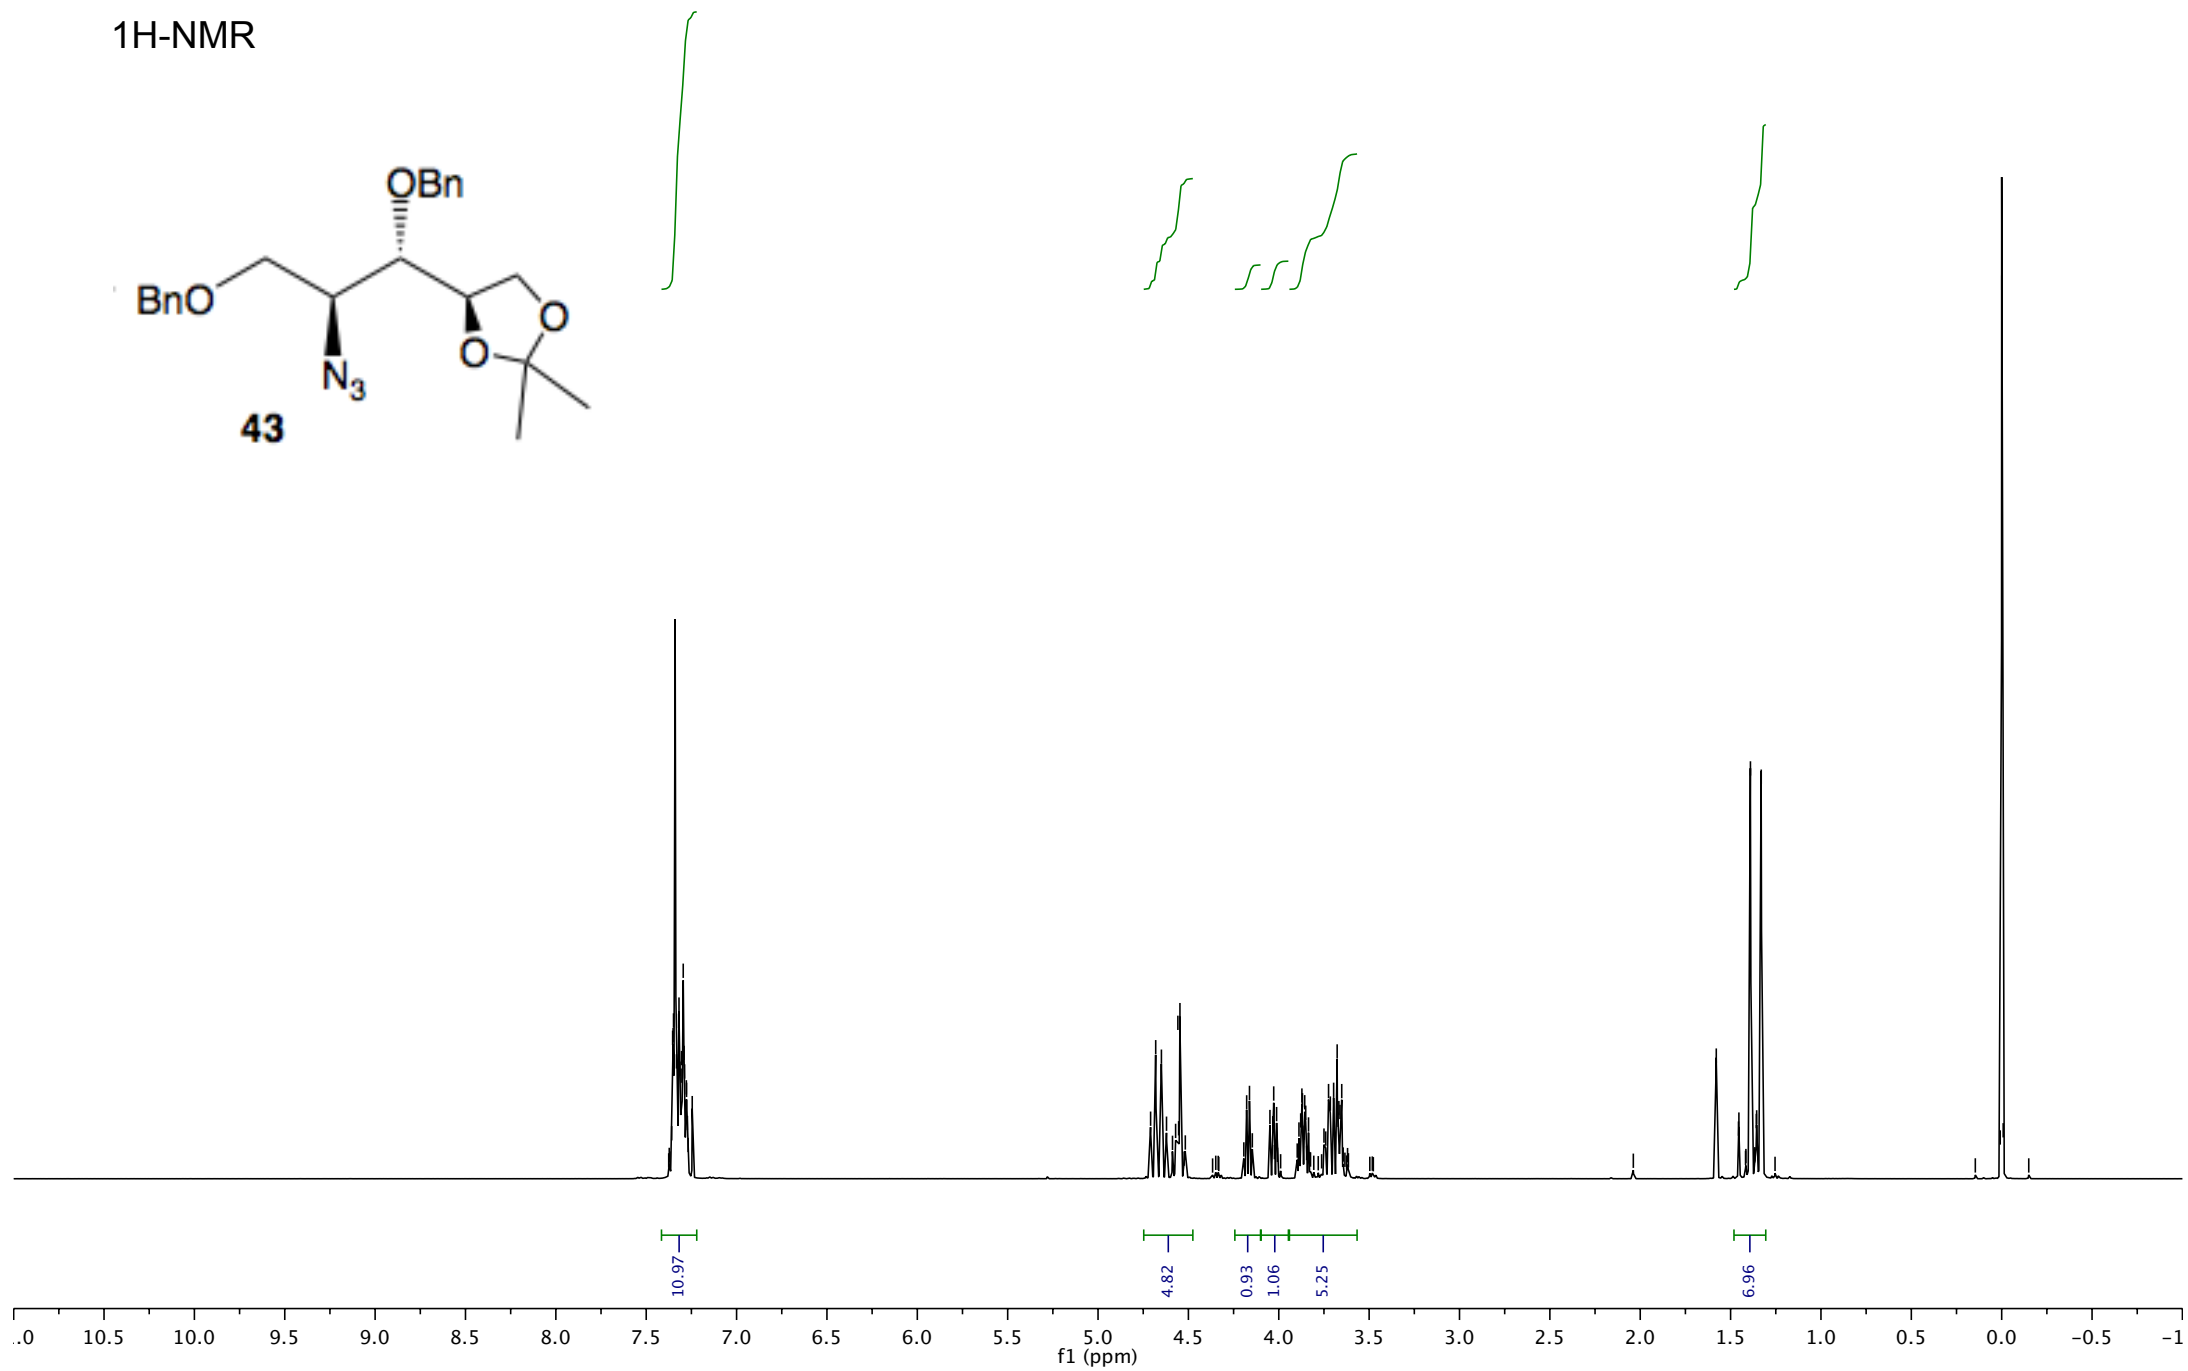

# 13C-NMR

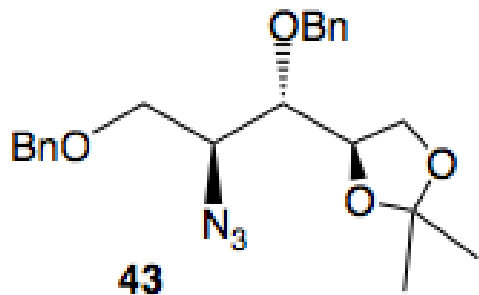

137.72  
137.65

128.46  
127.97  
127.67

109.29

79.13  
77.35 CDCl3  
77.04 CDCl3  
76.72 CDCl3  
75.27  
73.97  
73.41  
69.60  
66.48  
62.52

26.61  
25.25

0.01

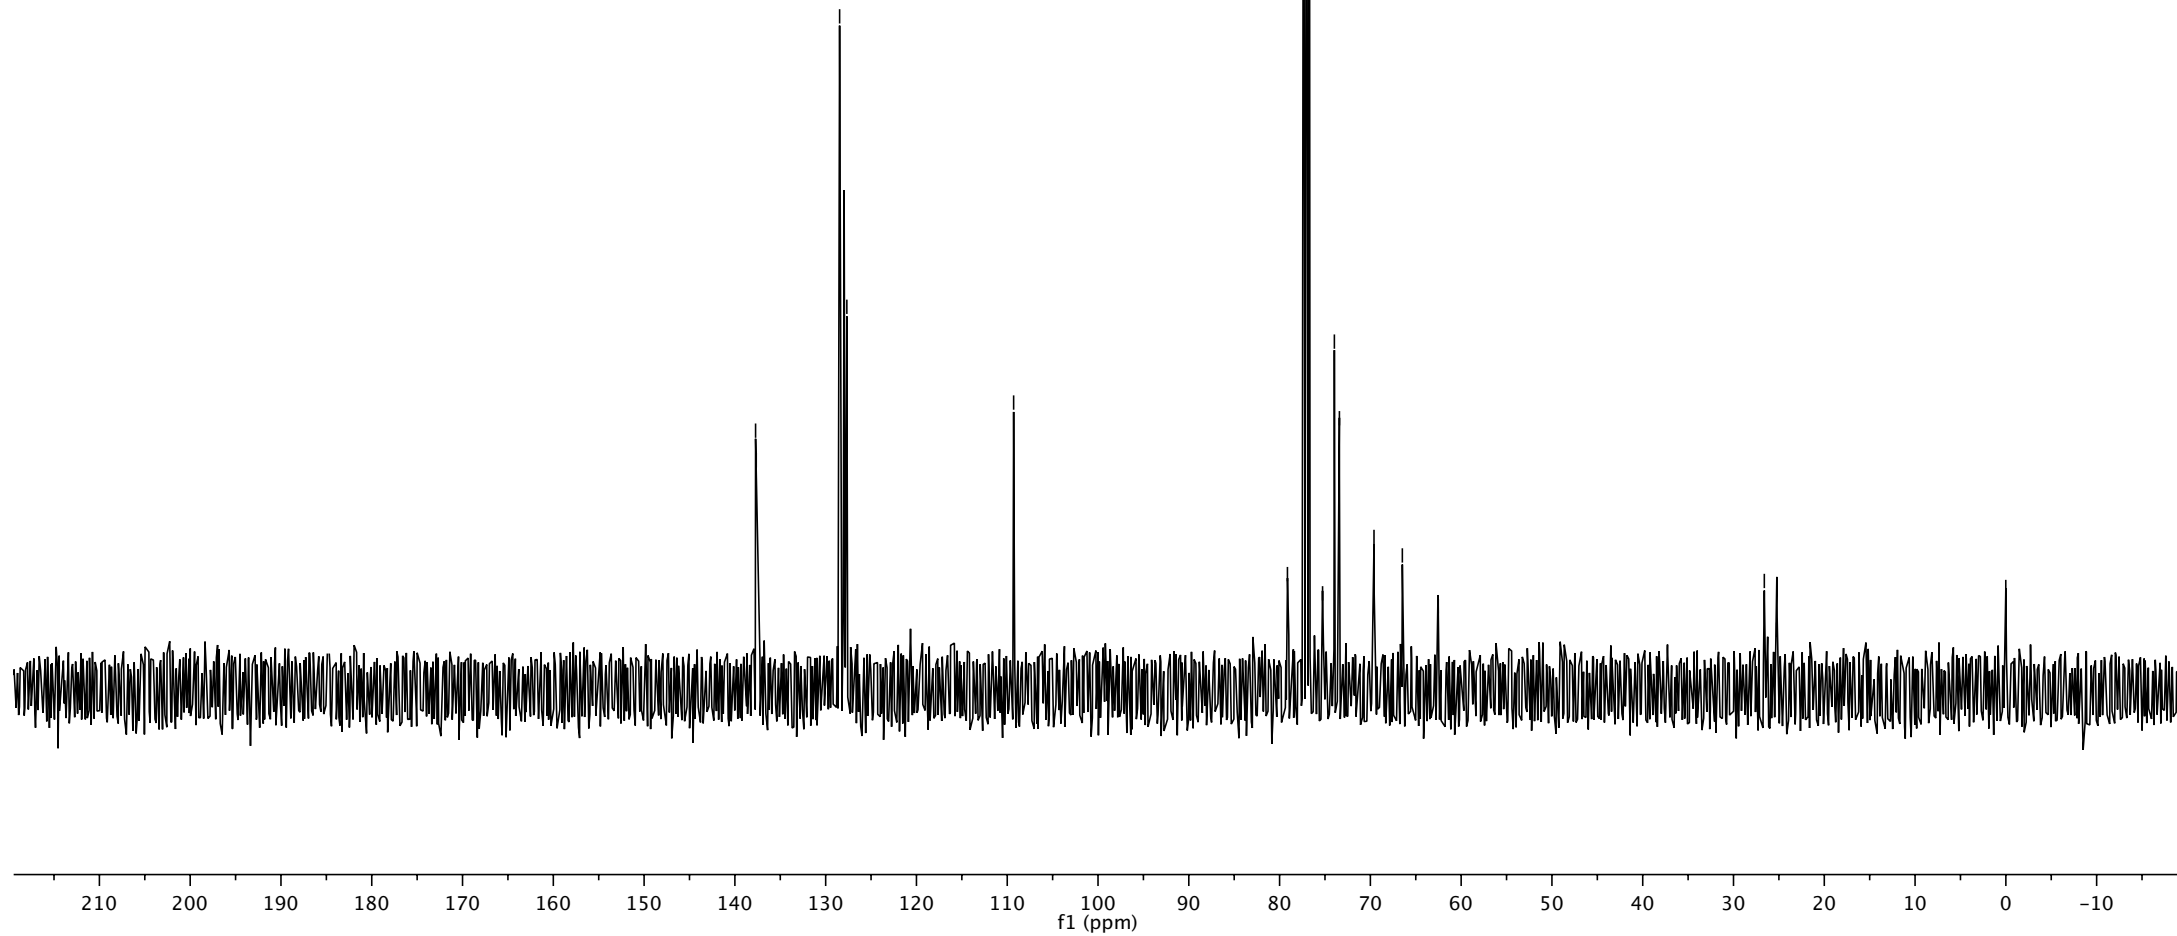

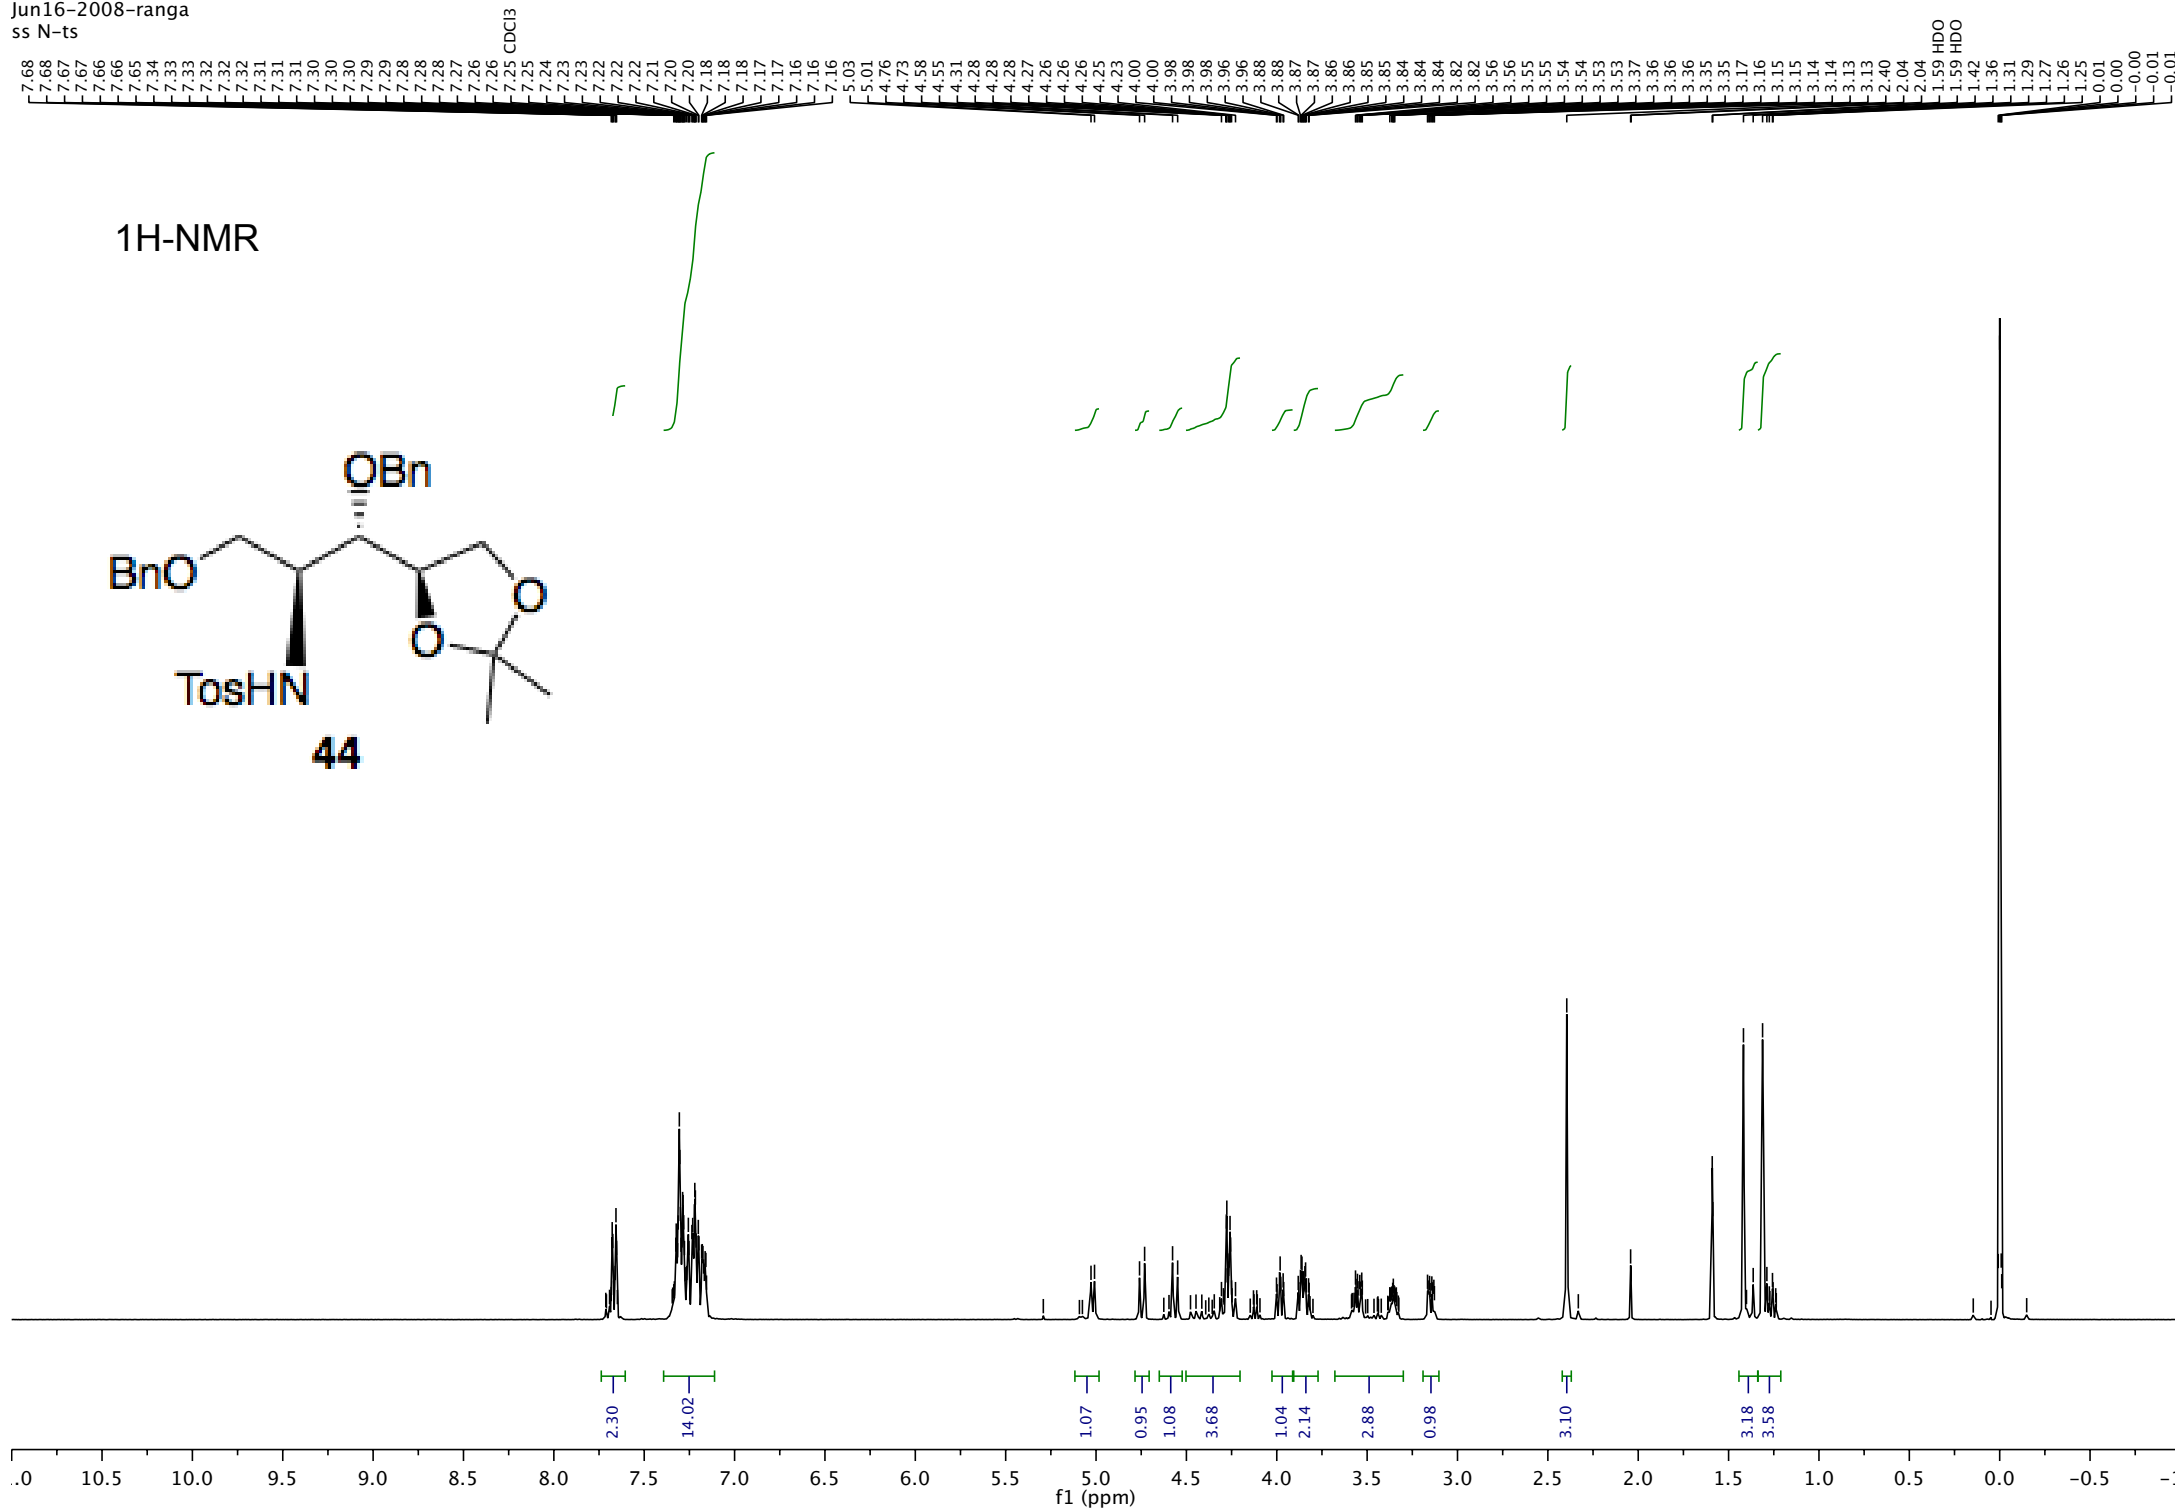



# 13C-NMR

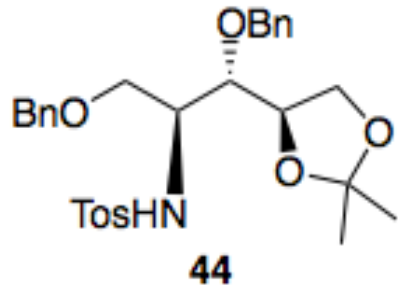

143.50  
138.06  
137.46  
137.15  
129.63  
128.42  
128.38  
128.36  
127.90  
127.87  
127.78  
127.72  
127.18

109.06

77.99 CDCI3  
77.34 CDCI3  
77.02 CDCI3  
76.70 CDCI3  
75.98  
74.73  
73.05  
67.33  
65.48

54.60

26.43  
24.96  
21.54

-0.00

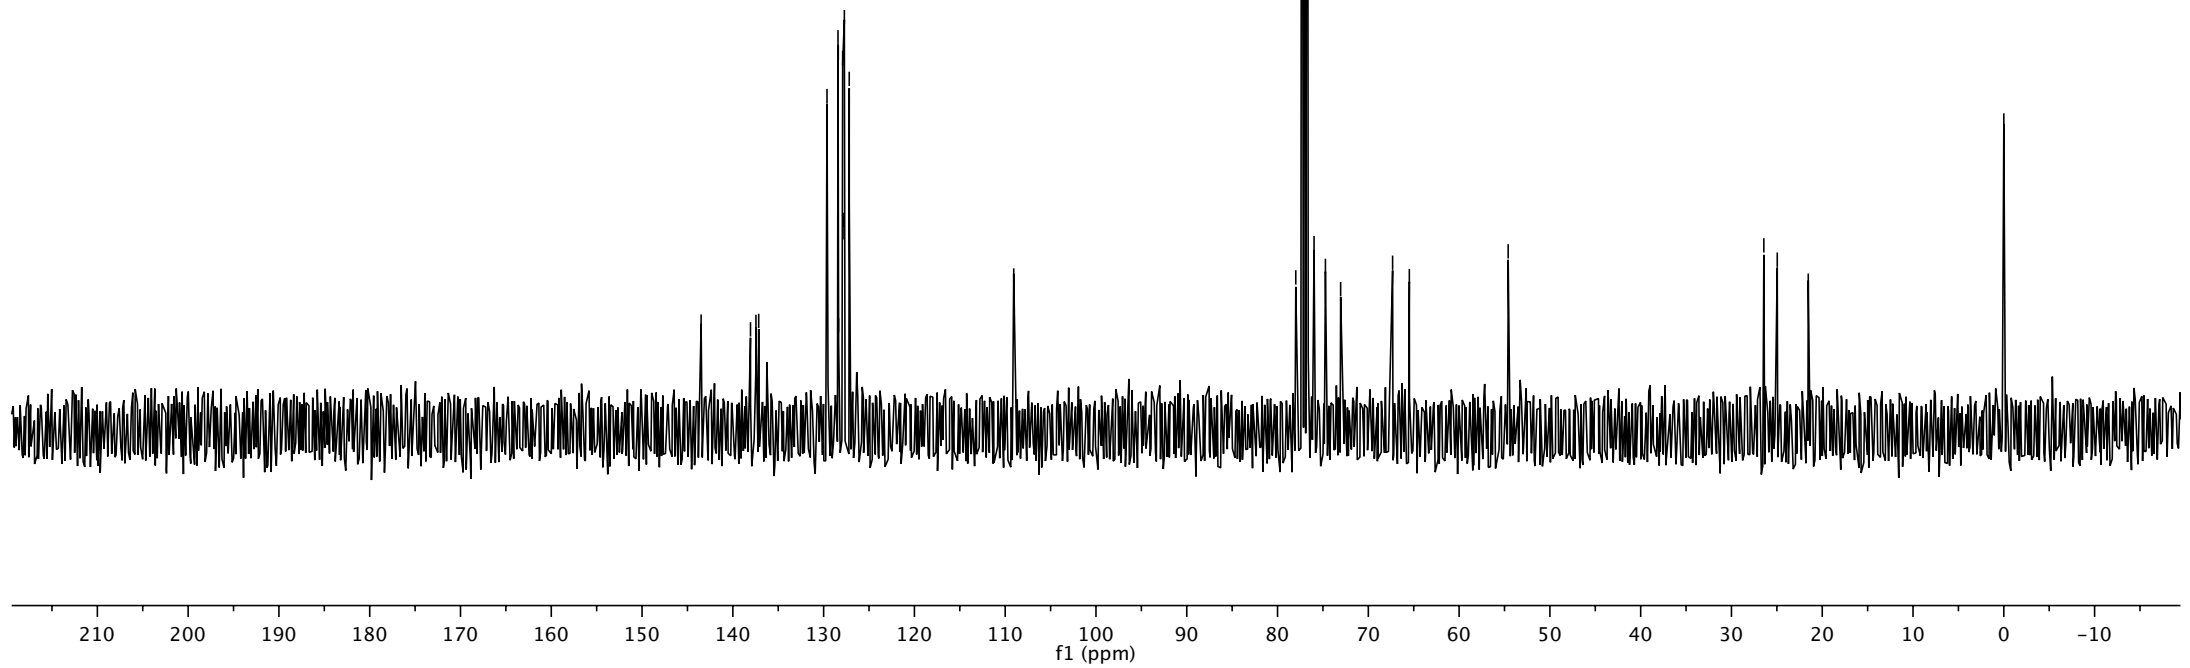

# 1H-NMR

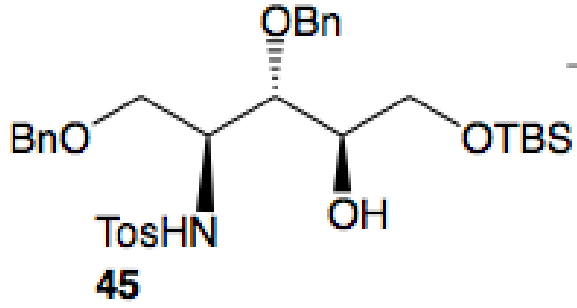

7.66  
7.65  
7.64  
7.64  
7.24  
7.23  
7.22  
7.22  
7.22  
7.21  
7.21  
7.20  
7.18  
7.17  
7.16  
7.15  
7.12  
7.11  
7.10  
7.10  
7.09  
5.98  
5.29  
5.15  
4.55  
4.52  
4.52  
4.43  
4.40  
4.37  
4.26  
4.23  
4.22  
4.19  
4.05  
4.03  
3.74  
3.72  
3.72  
3.69  
3.68  
3.65  
3.57  
3.55  
3.52  
3.52  
3.59  
2.71  
2.30  
2.28  
1.95  
1.19  
1.17  
1.15  
0.85  
0.85  
0.84  
0.83  
0.78  
0.78  
0.00  
-0.01  
-0.02  
-0.05  
-0.09  
-0.10

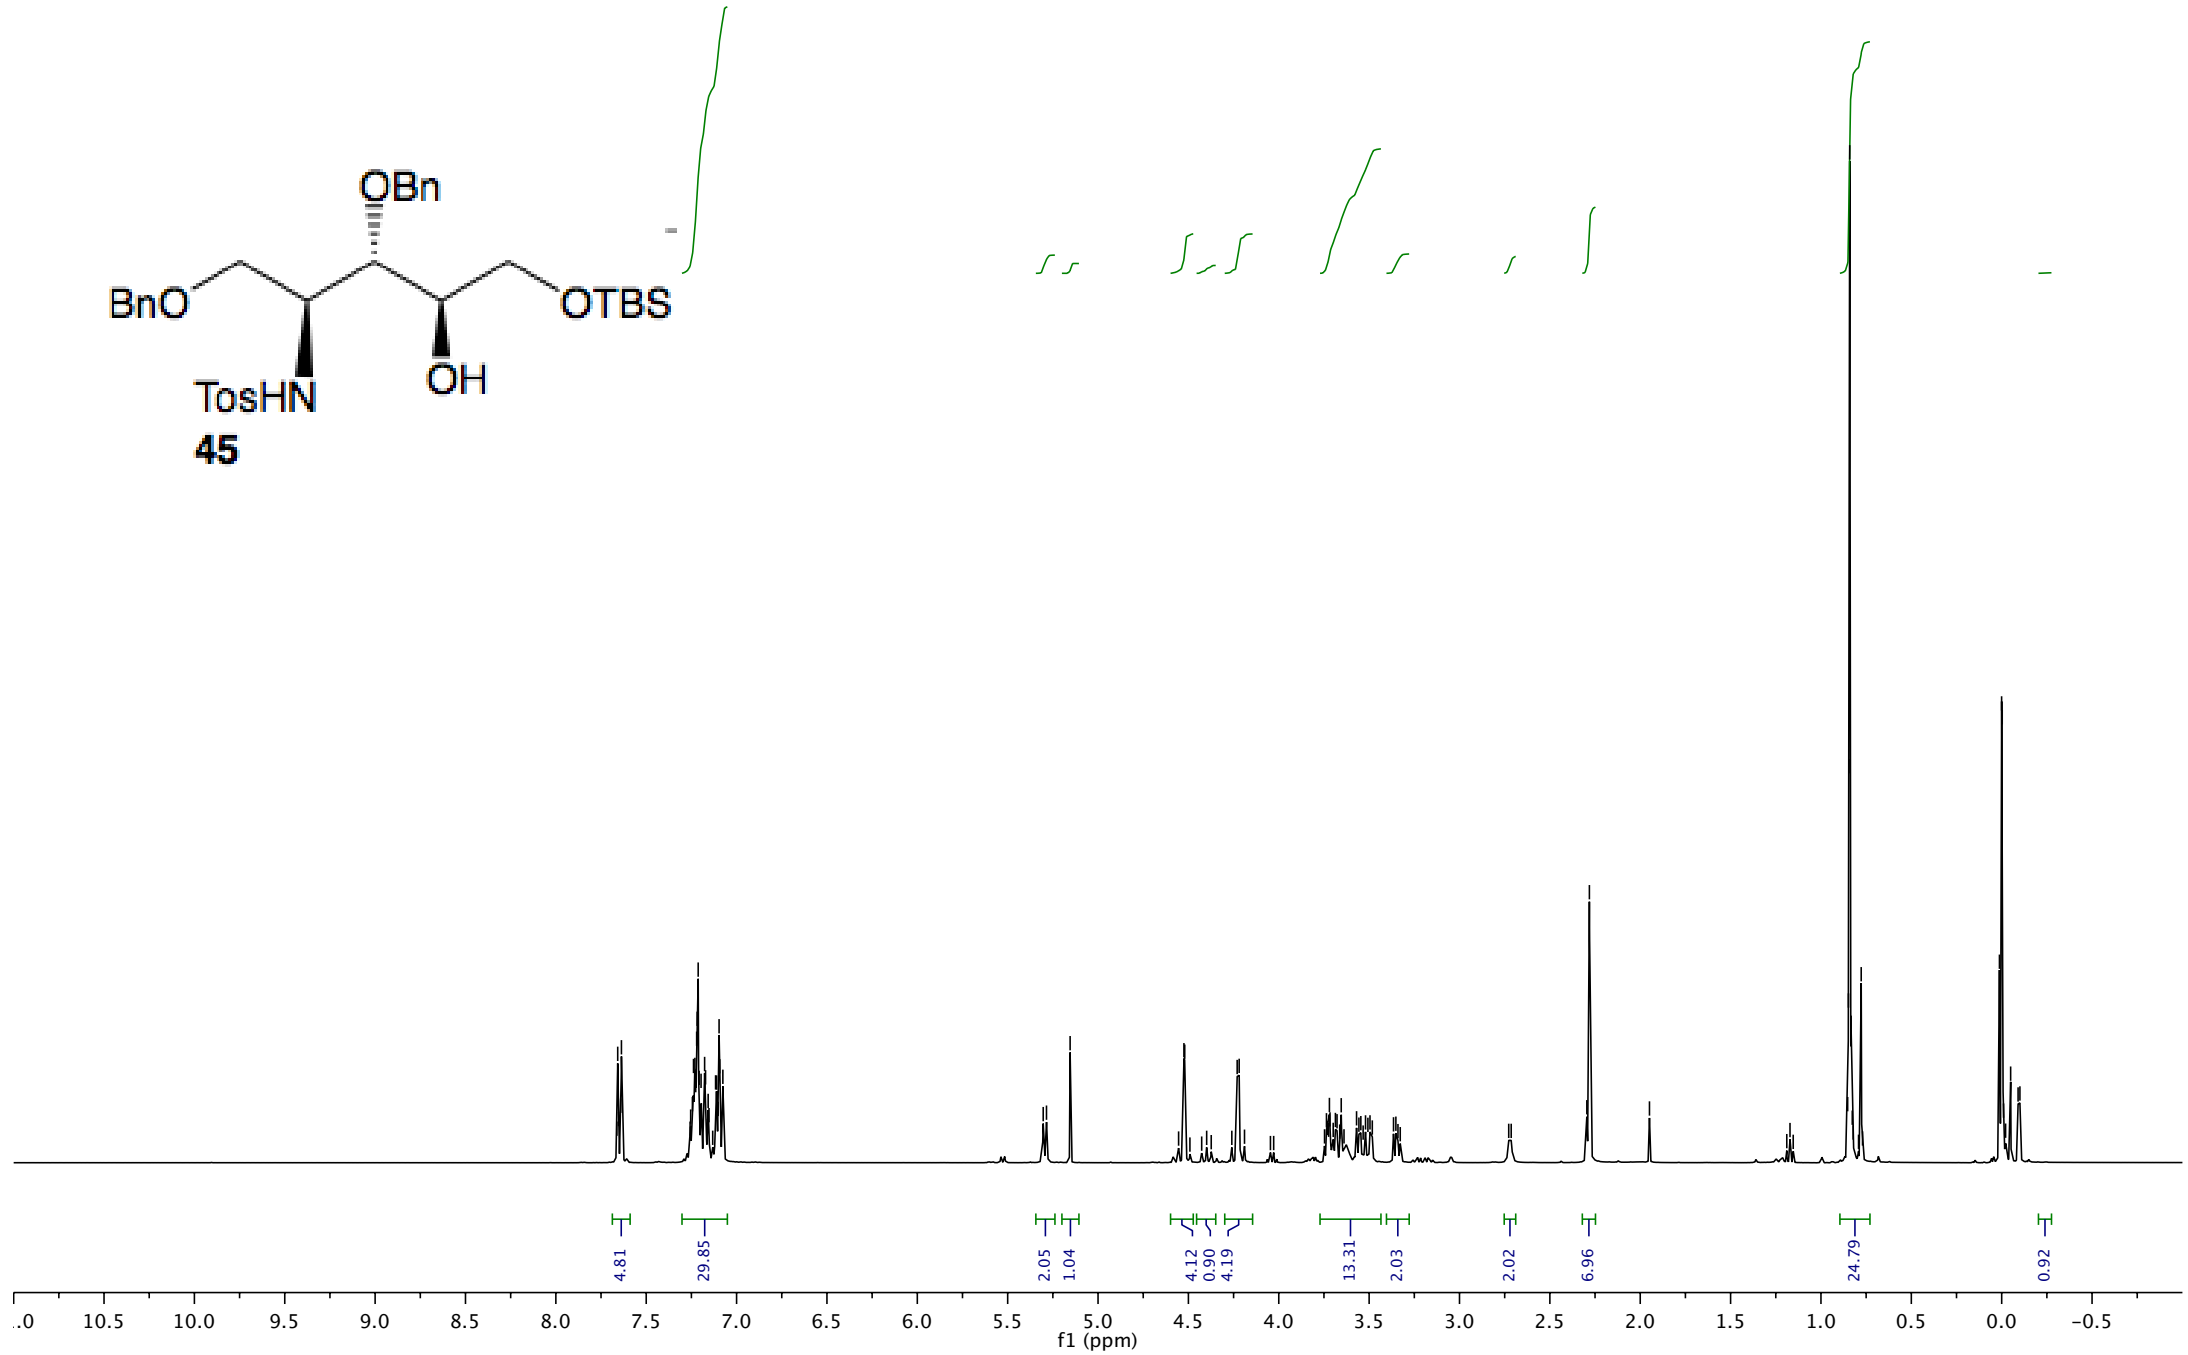

# 13C-NMR

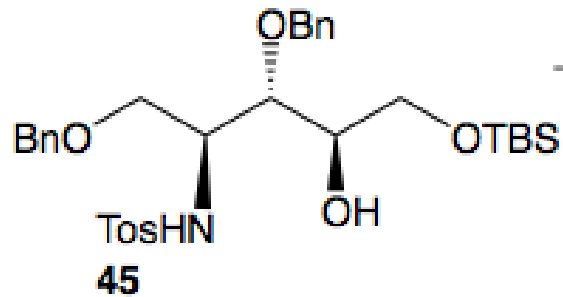

143.05  
143.02  
138.04  
137.59  
136.54  
129.50  
129.44  
128.40  
128.37  
128.33  
128.27  
128.16  
127.90  
127.88  
127.84  
127.70  
127.63  
127.57  
127.55  
127.15  
127.03

80.13  
78.56  
77.46  
77.14 CDCl3  
76.82  
73.74  
73.21  
73.17  
72.90  
71.53  
70.22  
69.61  
68.29  
63.67  
63.60  
60.31

25.86  
25.78  
25.66  
21.45  
21.43  
18.19  
18.08  
17.93  
14.15

-0.00  
-3.58  
-5.40  
-5.43  
-5.53  
-5.55

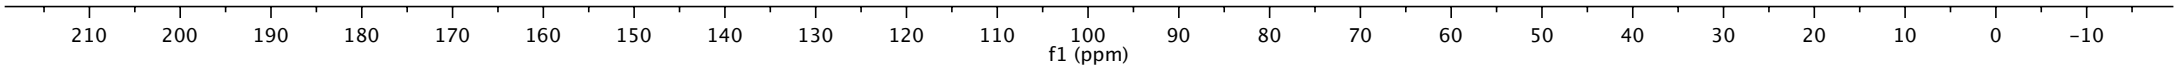

1H-NMR

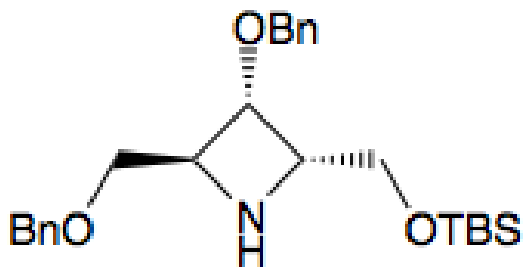

46

7.30  
7.29  
7.28  
7.27  
7.27 CDC13  
7.26  
7.25  
7.24  
7.22  
7.22  
7.21  
7.20  
7.19

4.47  
4.45  
4.42  
4.41  
4.38  
4.15  
4.13  
3.91  
3.84  
3.82  
3.77  
3.74  
3.43  
3.42  
3.42

2.29

1.20

0.84  
0.83  
0.82

-0.00  
-0.01  
-0.05  
-0.05

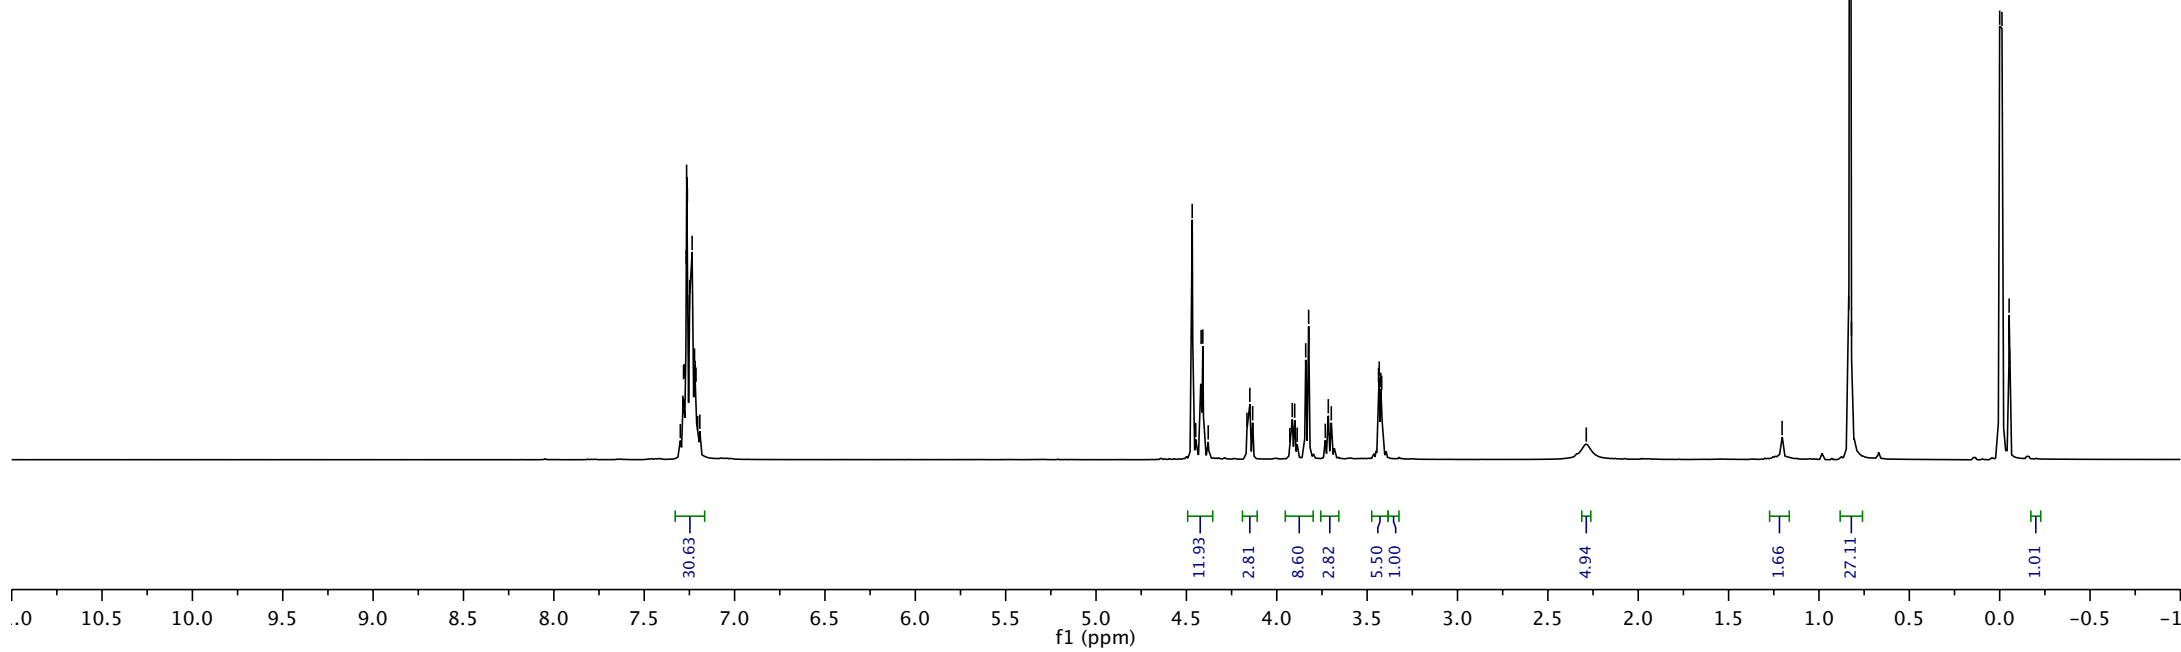

# 13C-NMR

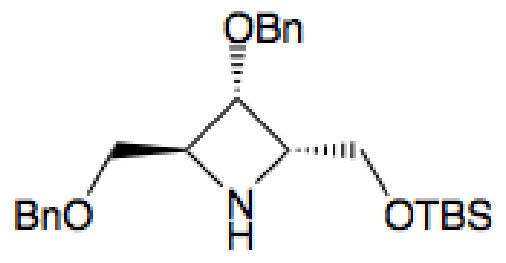

46

138.17  
138.09

128.35  
128.33  
127.68  
127.64  
127.61

77.37  
77.05 CDCl3  
76.73 CDCl3

74.62  
73.28  
72.34  
71.85

63.99  
62.27  
61.51

29.69  
25.90

18.25

0.00  
-5.30  
-5.32

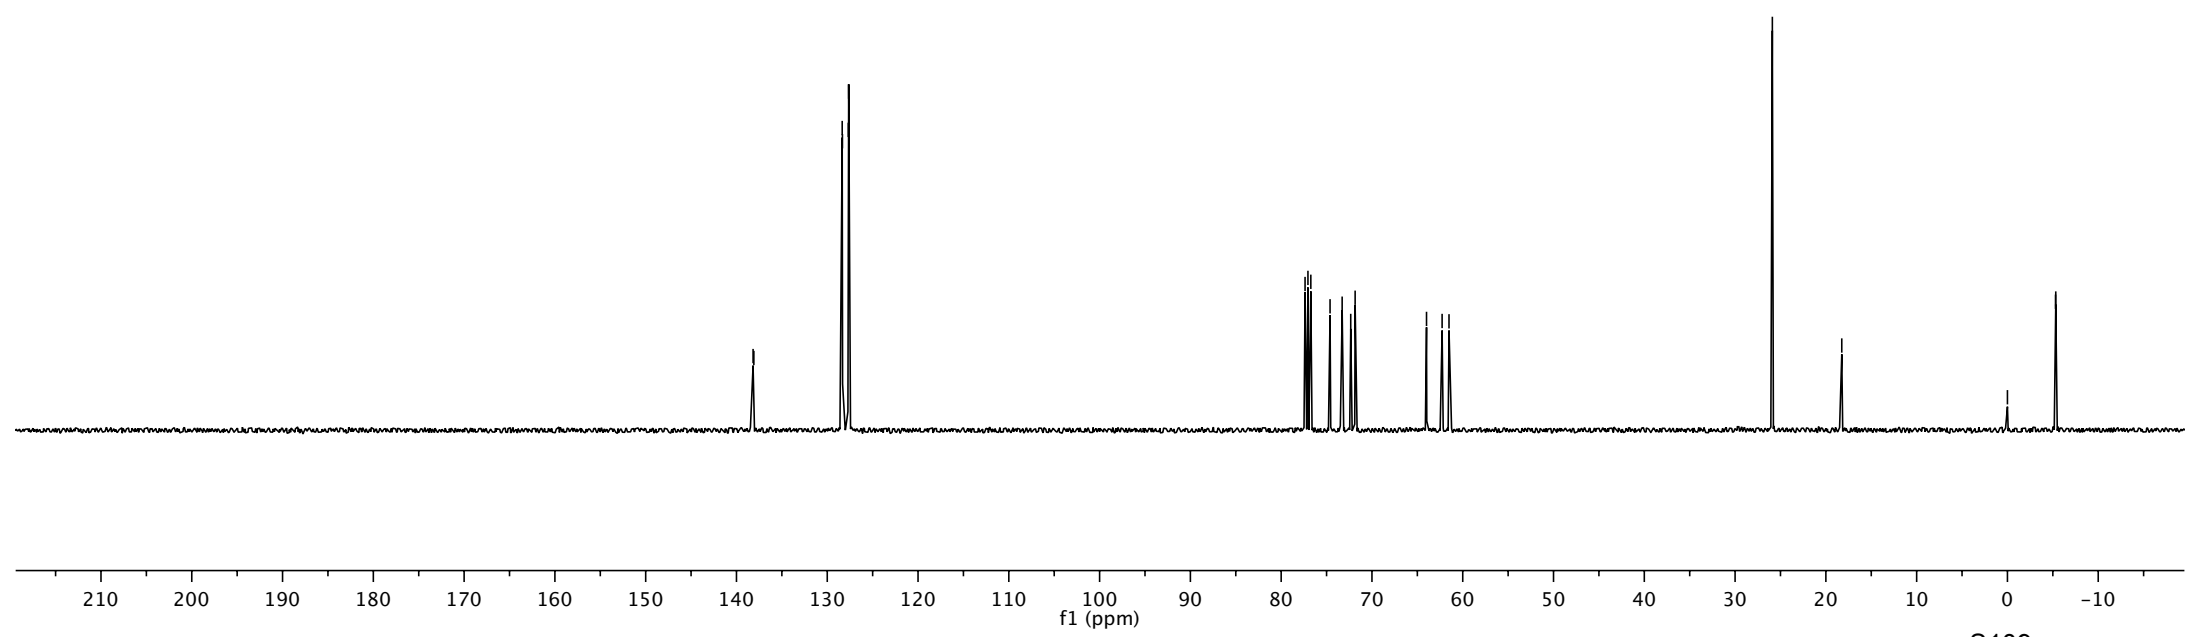

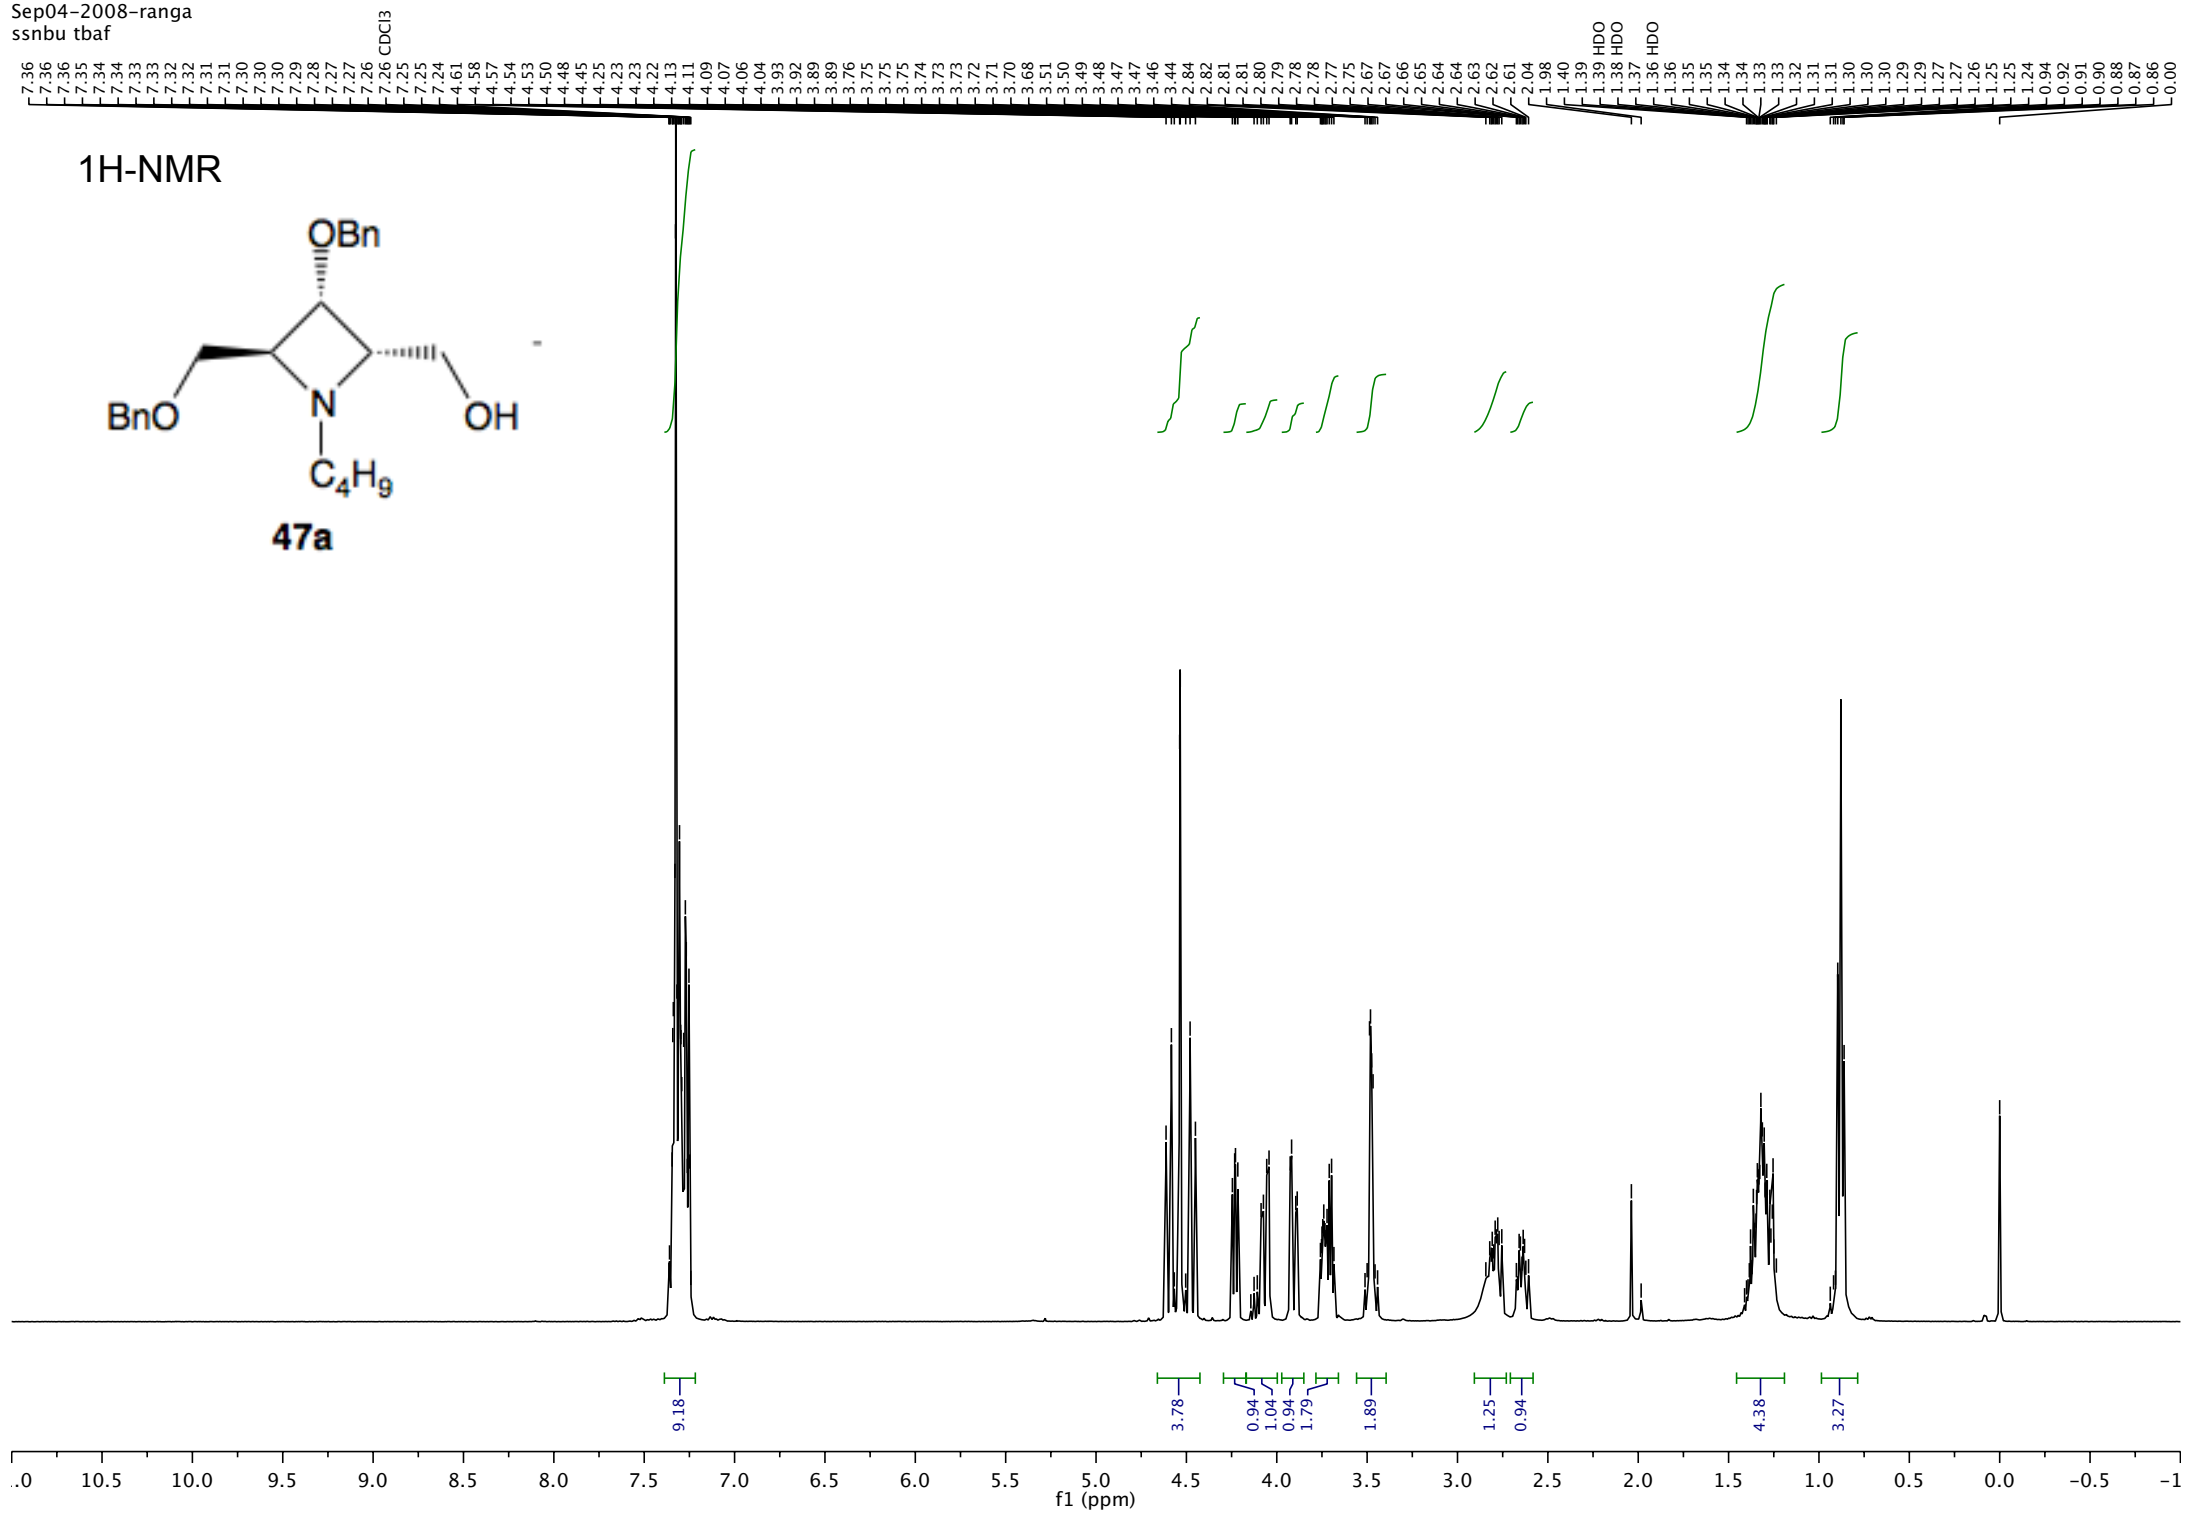

# 13C-NMR

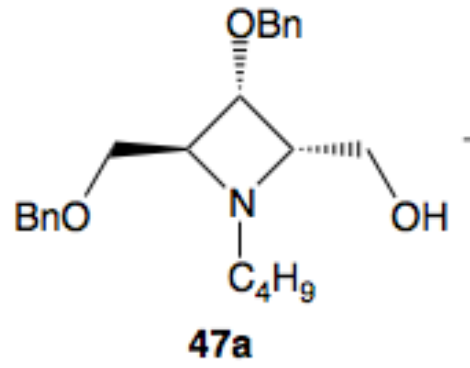

138.20  
137.63  
128.48  
128.36  
127.87  
127.69  
127.68  
127.63

77.36 CDCl3  
77.04 CDCl3  
76.72 CDCl3  
74.86  
73.36  
71.91  
71.50  
71.09  
64.92  
60.37

49.77

31.41

20.60

14.01

-0.00

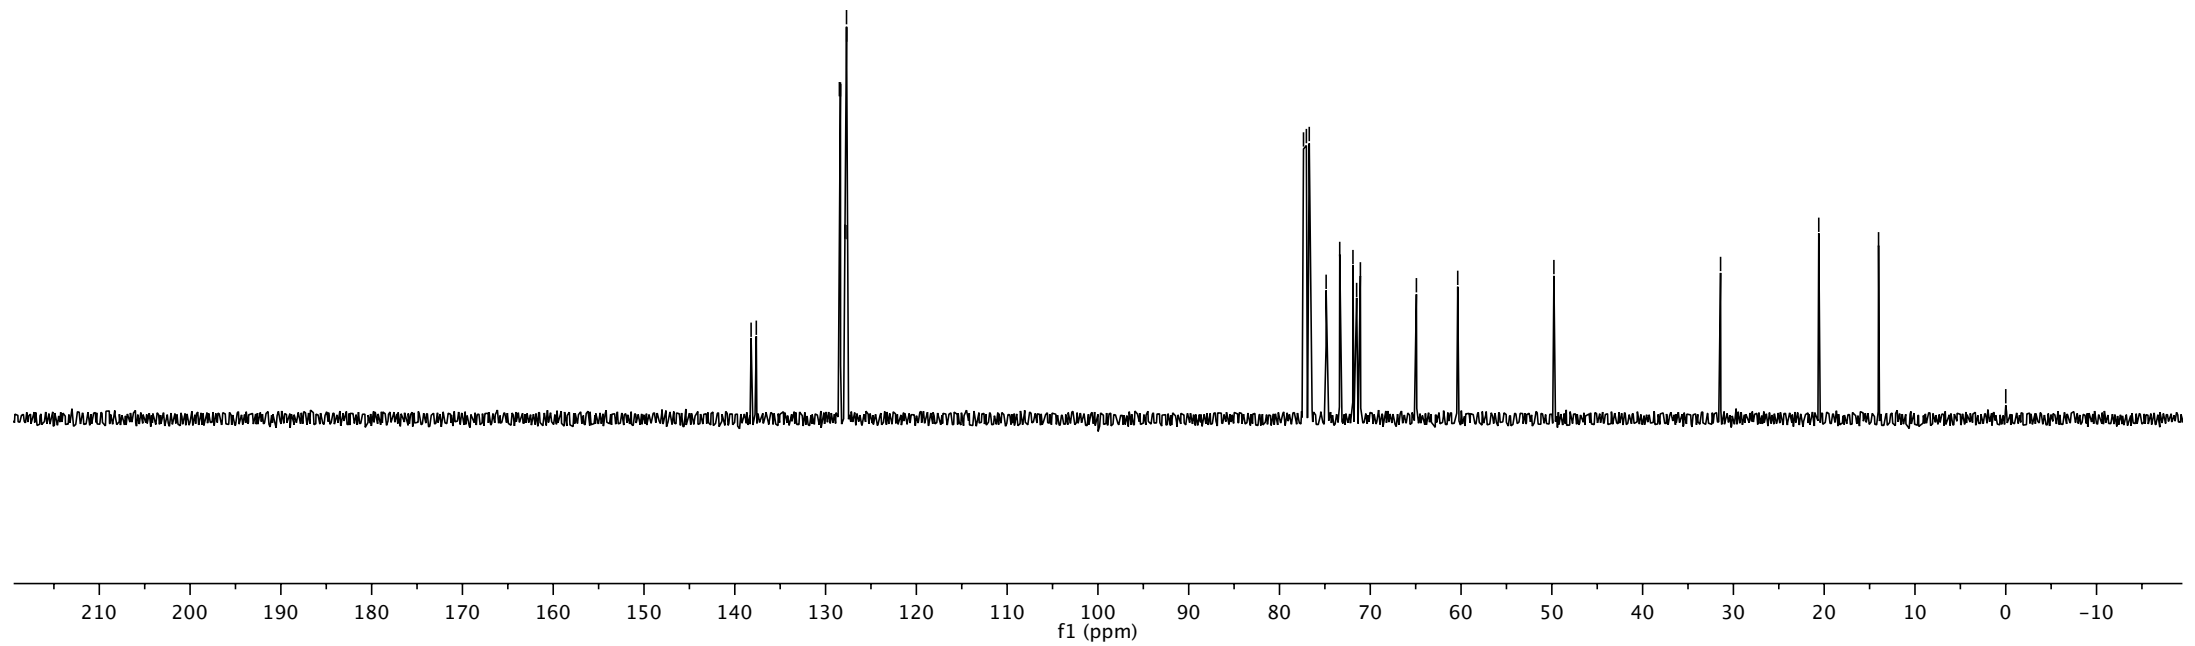

1H-NMR

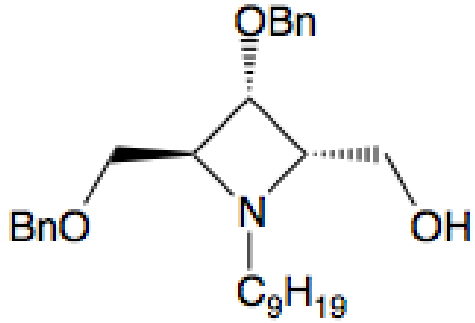

47b

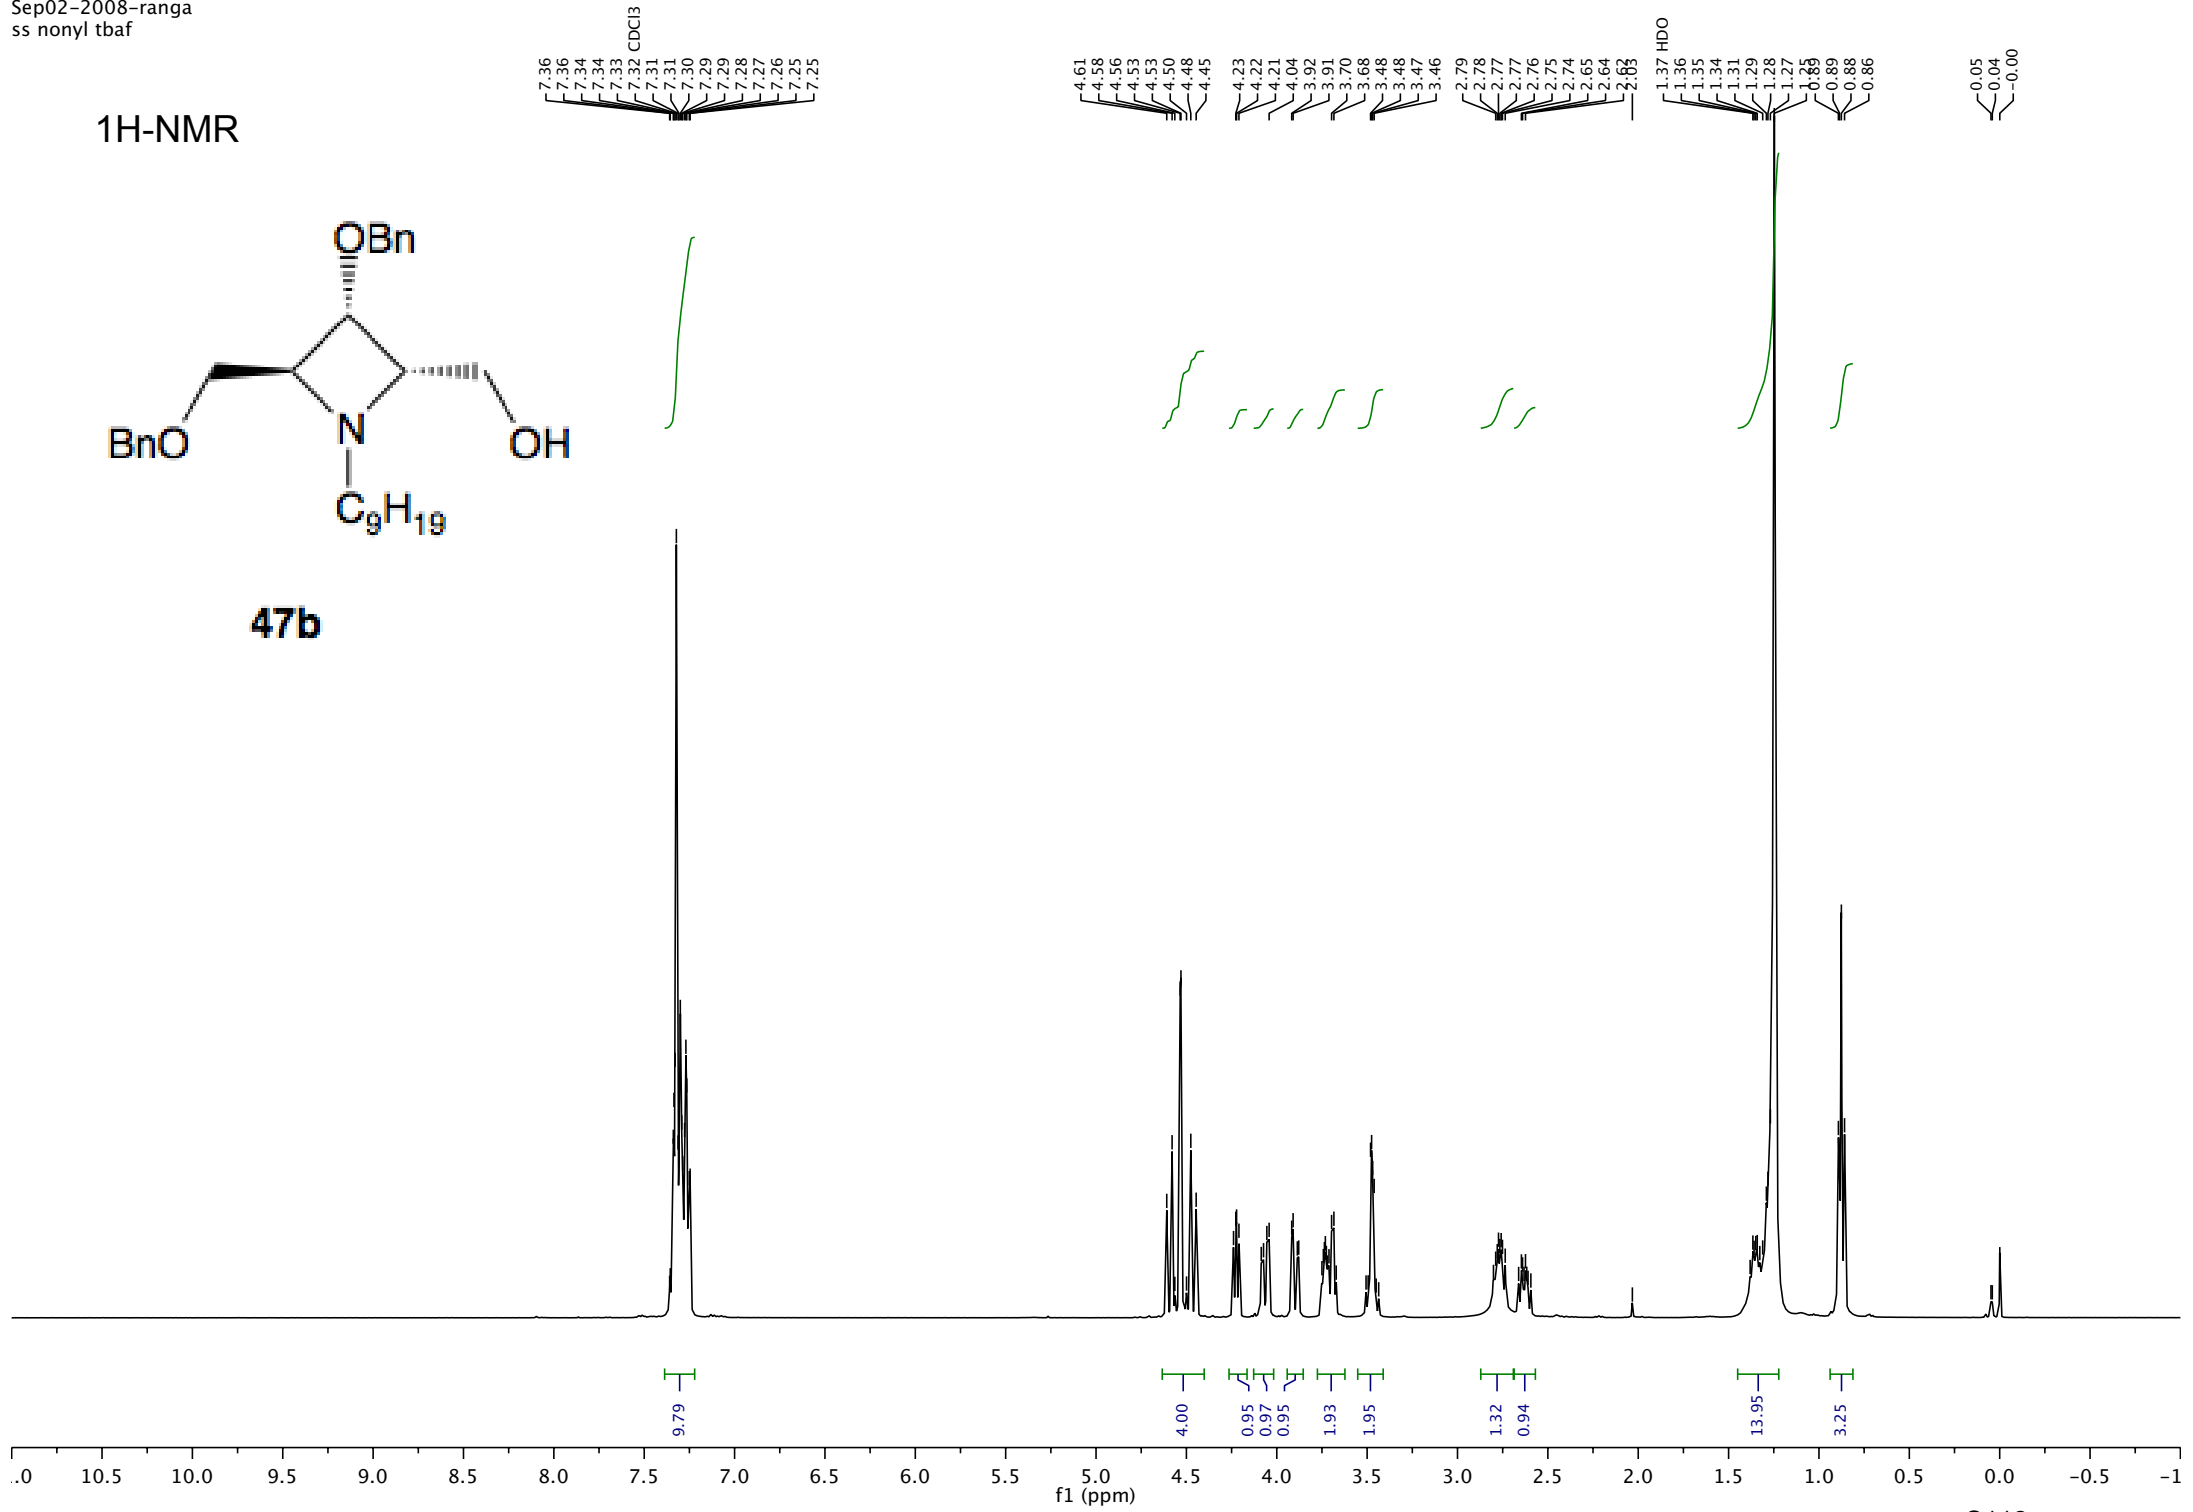



# 13C-NMR

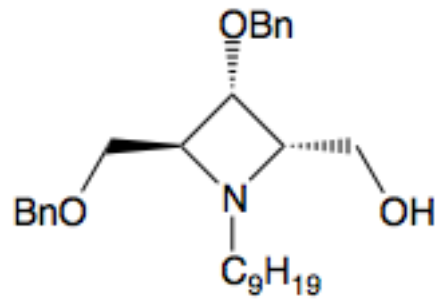

**47b**

138.22  
137.64  
128.49  
128.37  
127.88  
127.70  
127.68  
127.63

99.99

77.40 CDCl<sub>3</sub>  
77.08 CDCl<sub>3</sub>  
76.76 CDCl<sub>3</sub>  
74.88  
73.36  
71.90  
71.56  
71.11  
64.85  
60.39

50.14

31.90  
28.59  
28.57  
29.34  
29.30  
27.49  
22.70

14.14

0.02

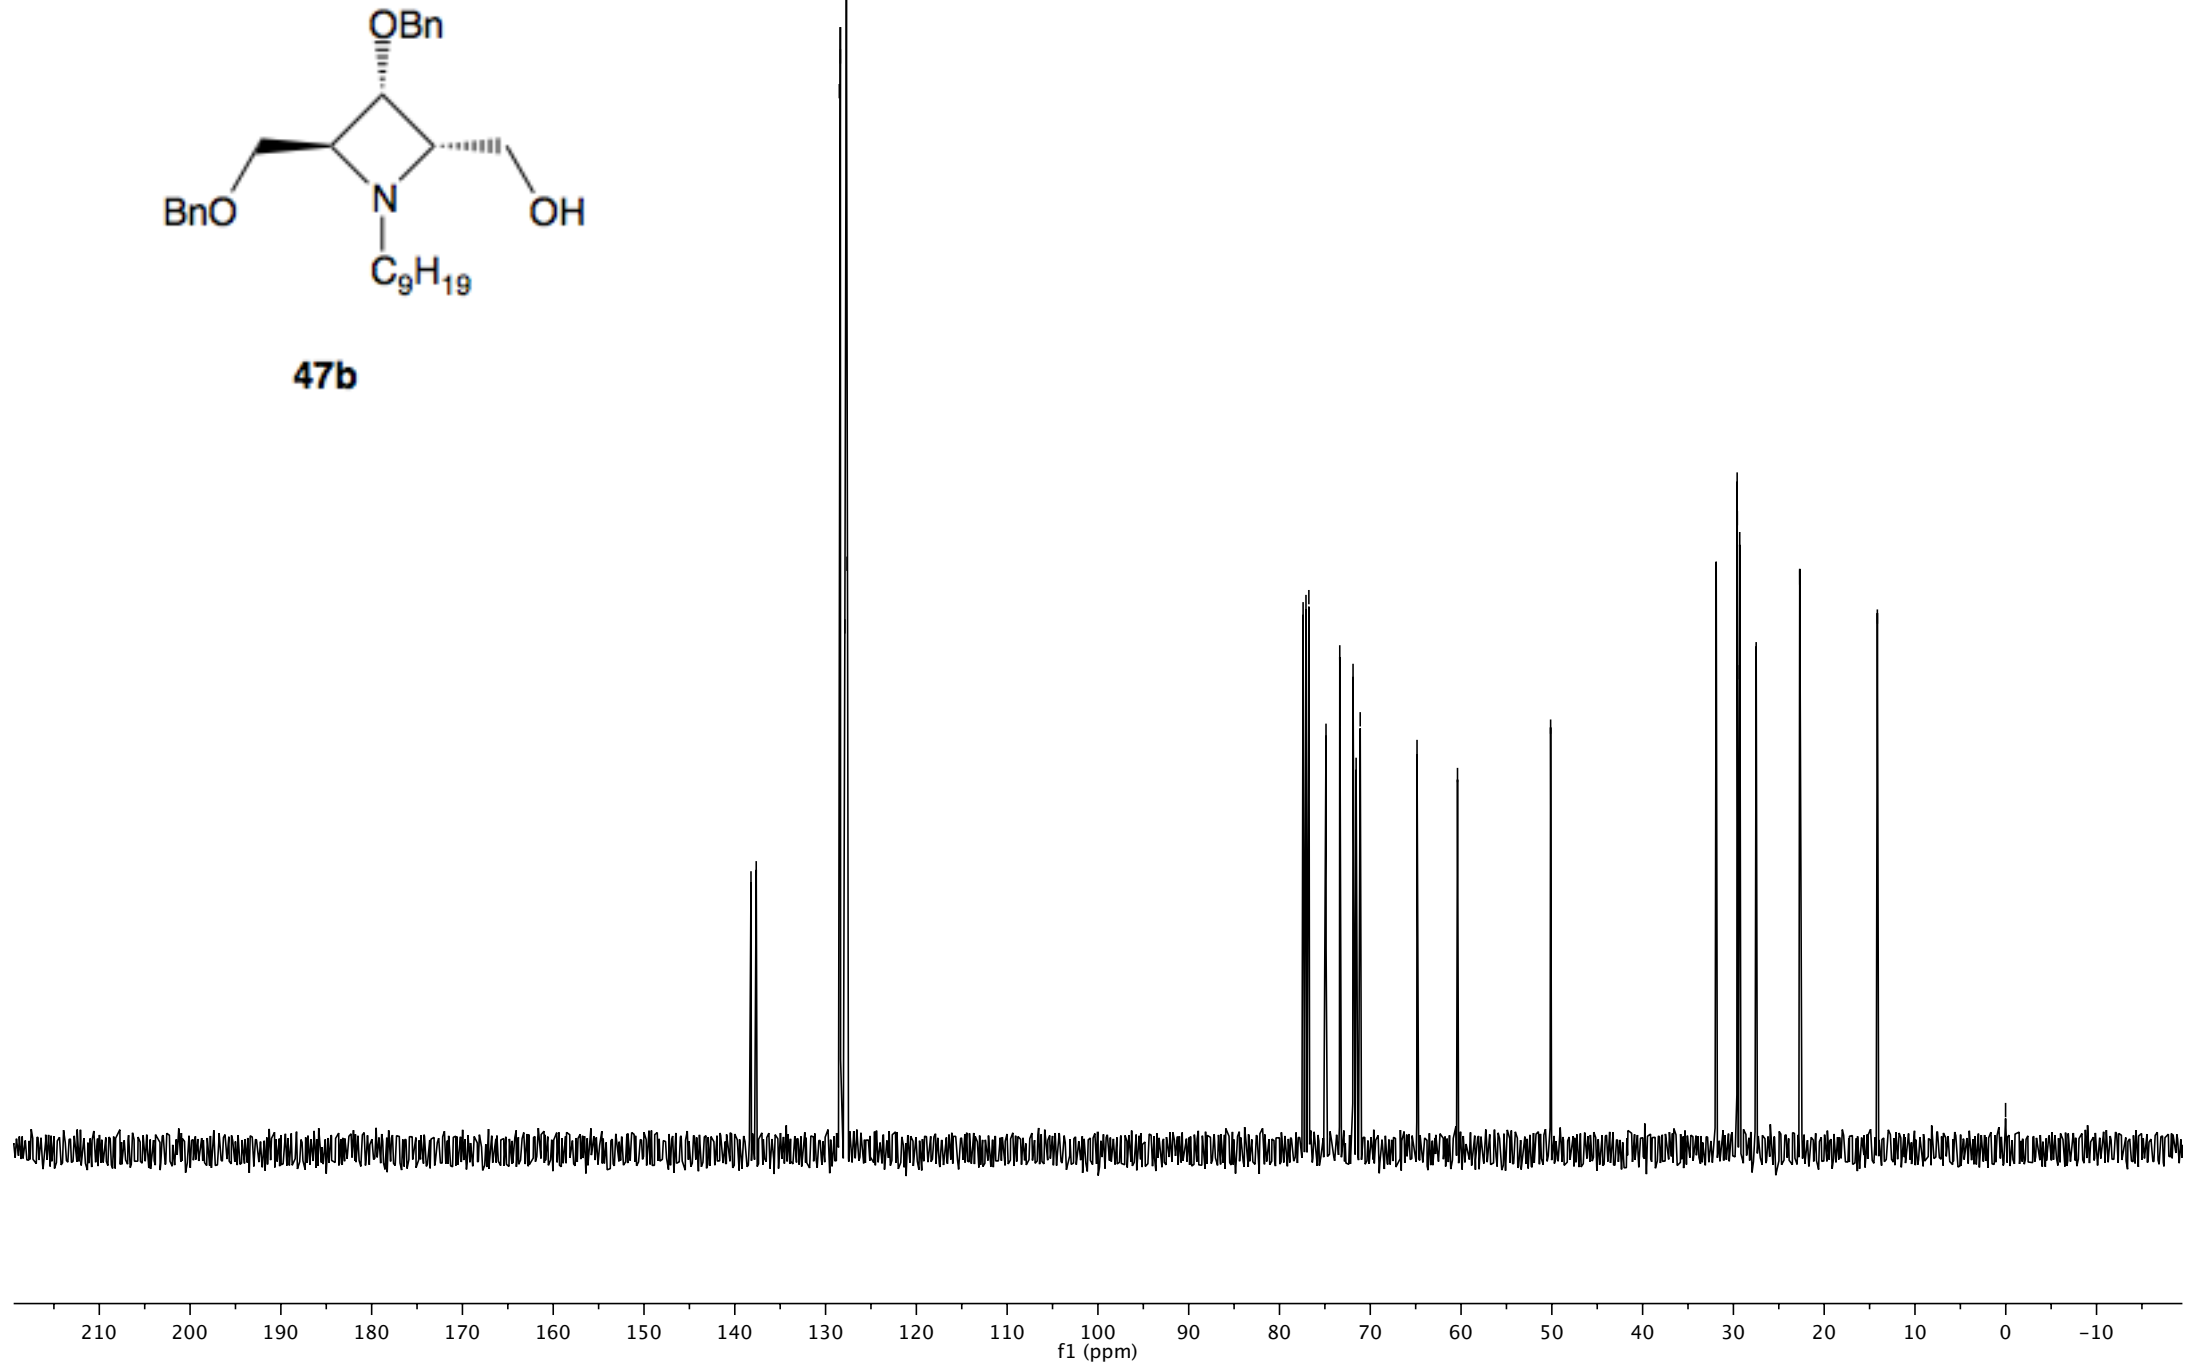

# 1H-NMR

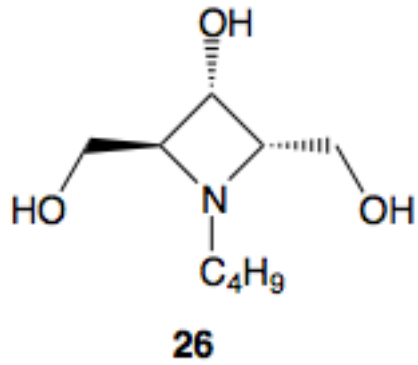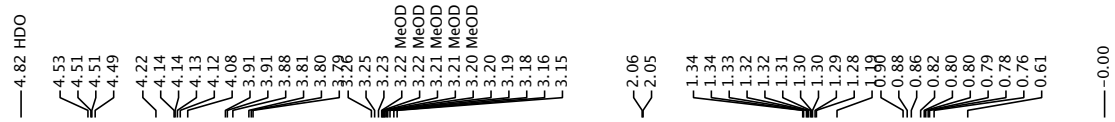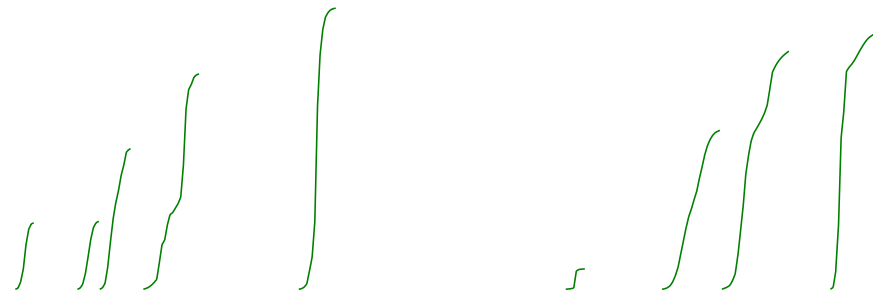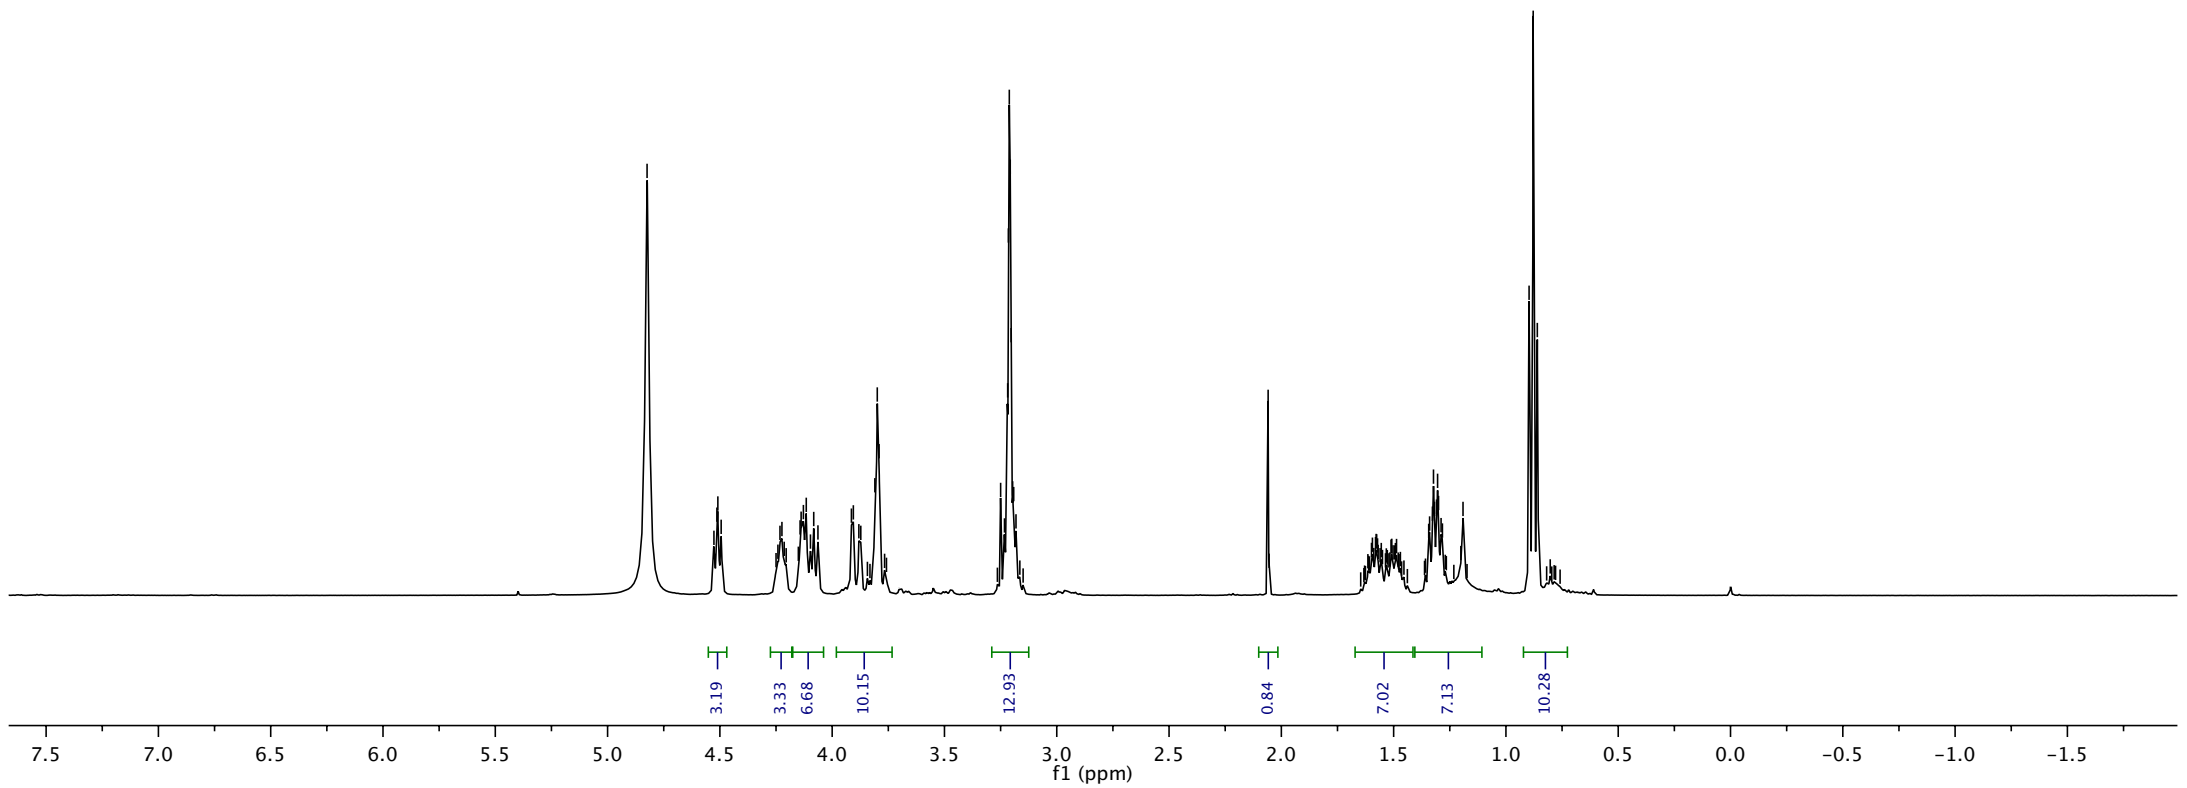

# 13C-NMR

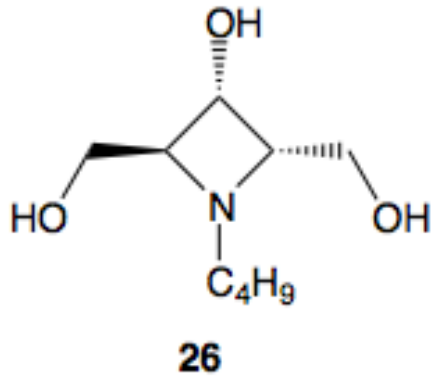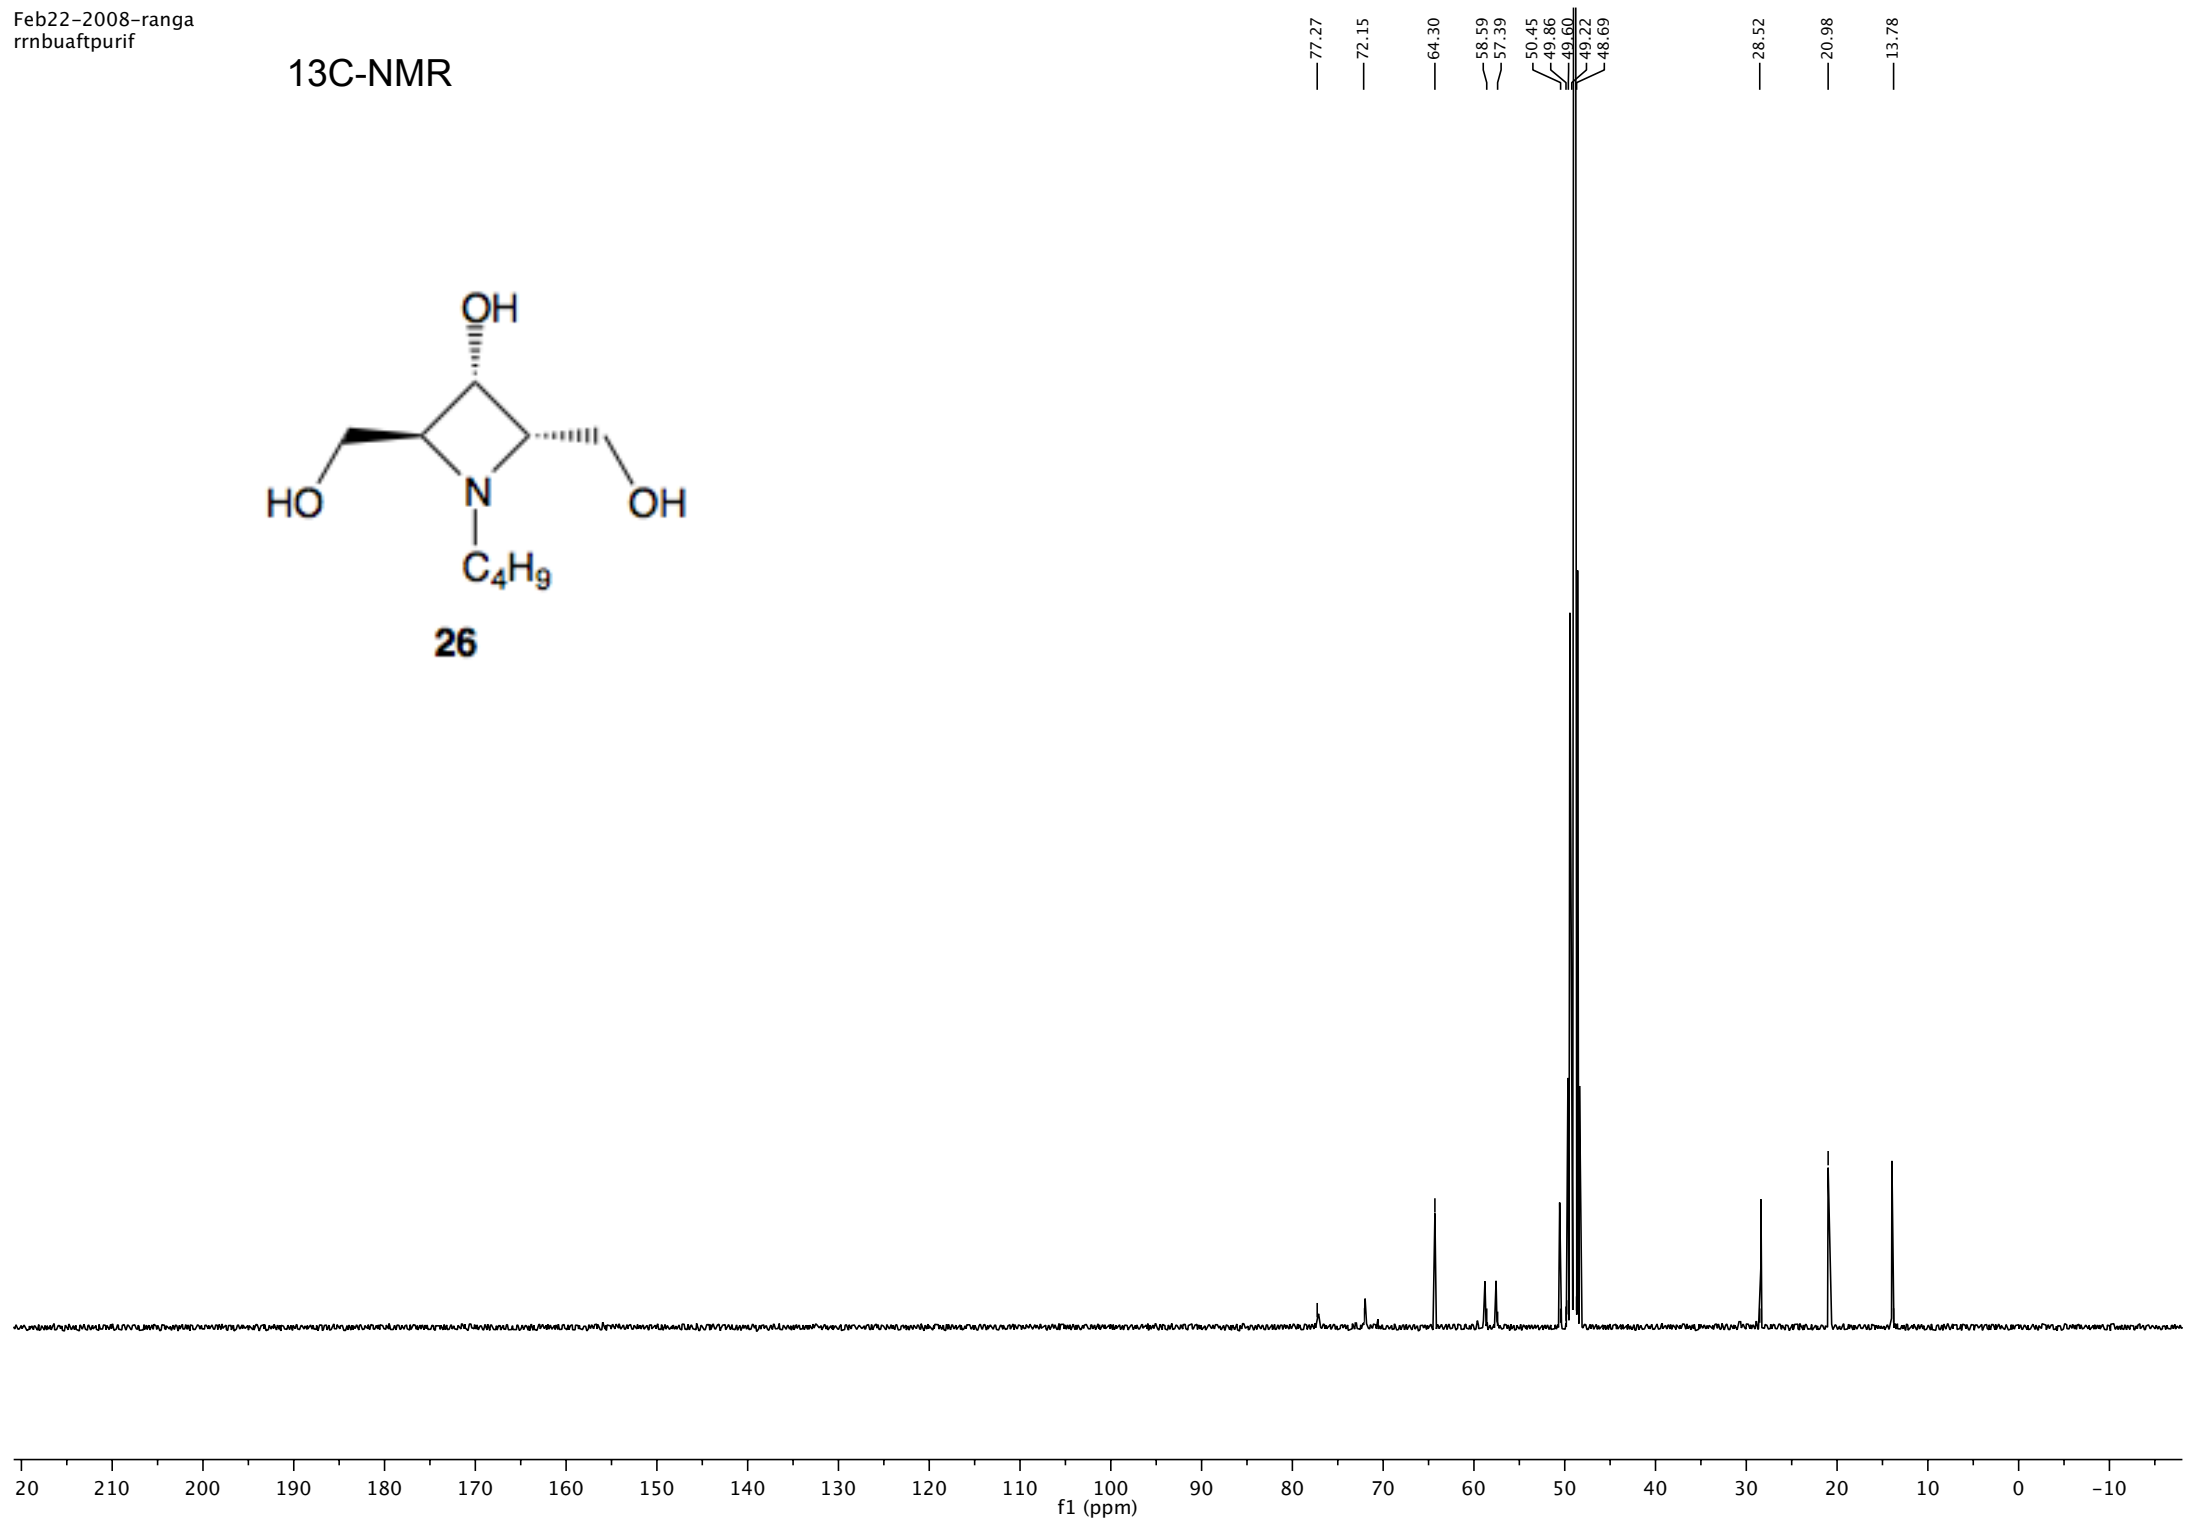

# 1H-NMR

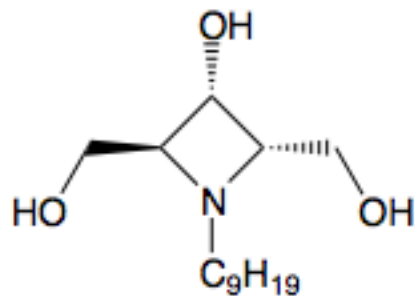

27

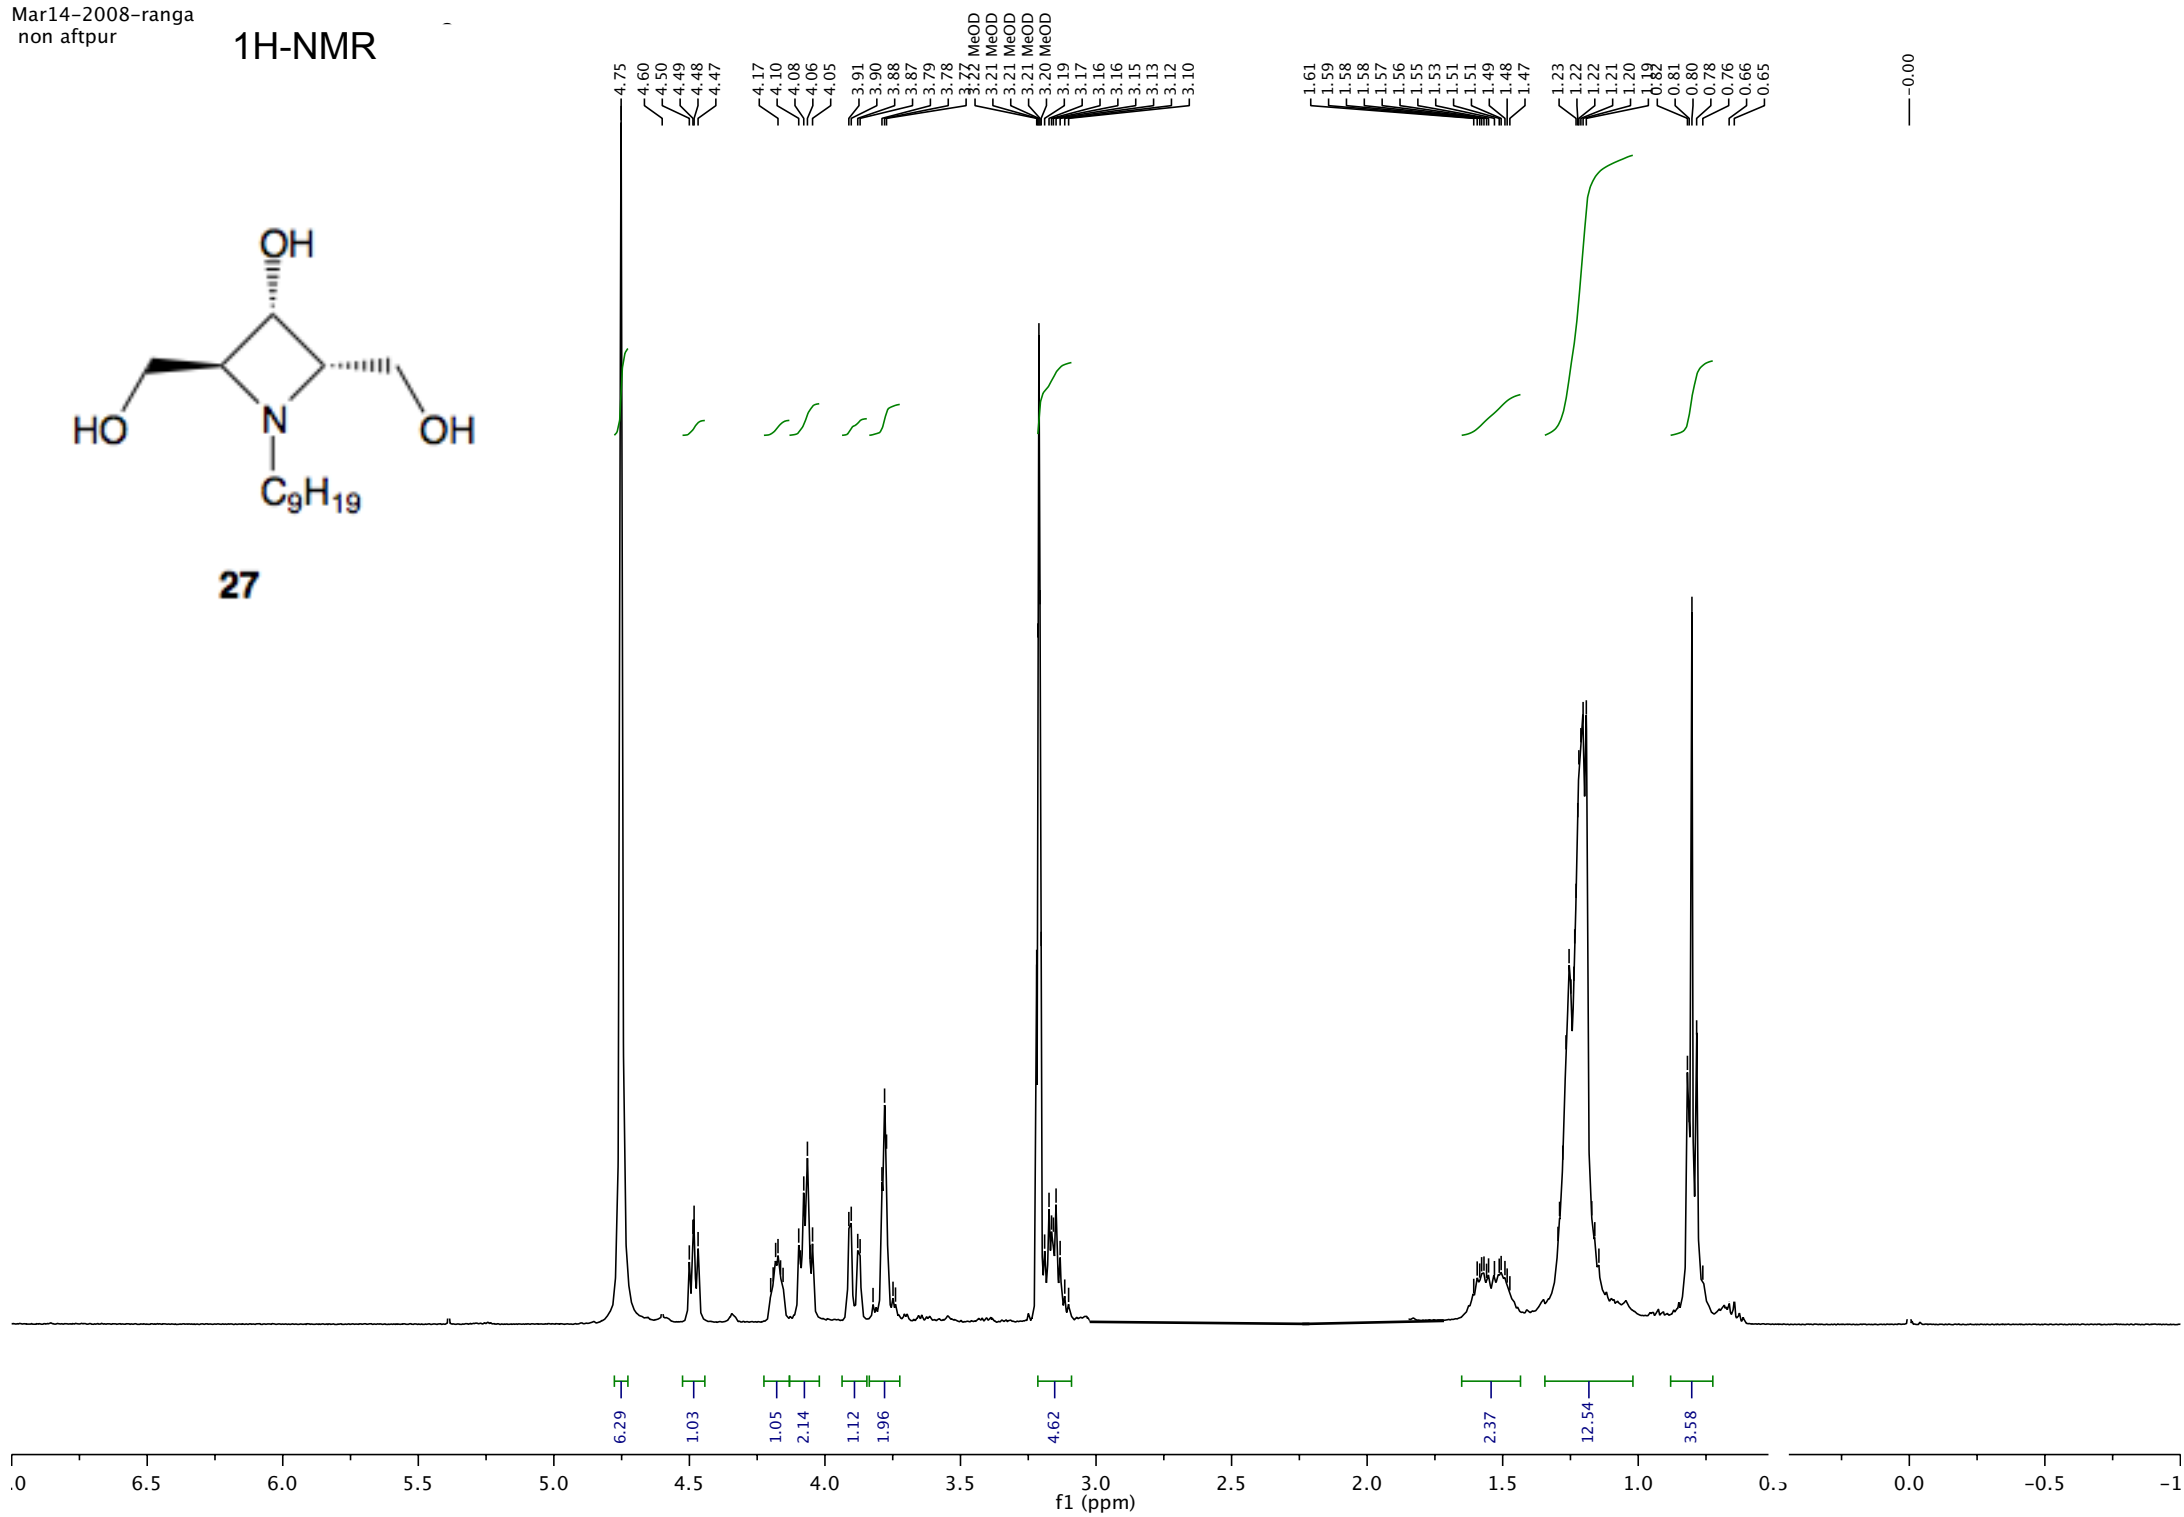

# 13C-NMR

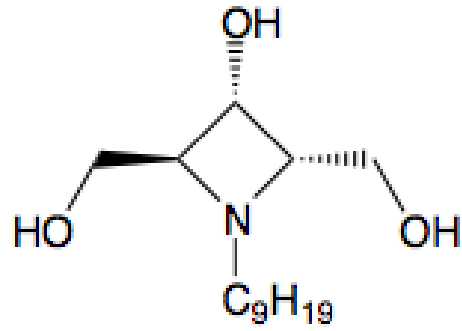

**27**

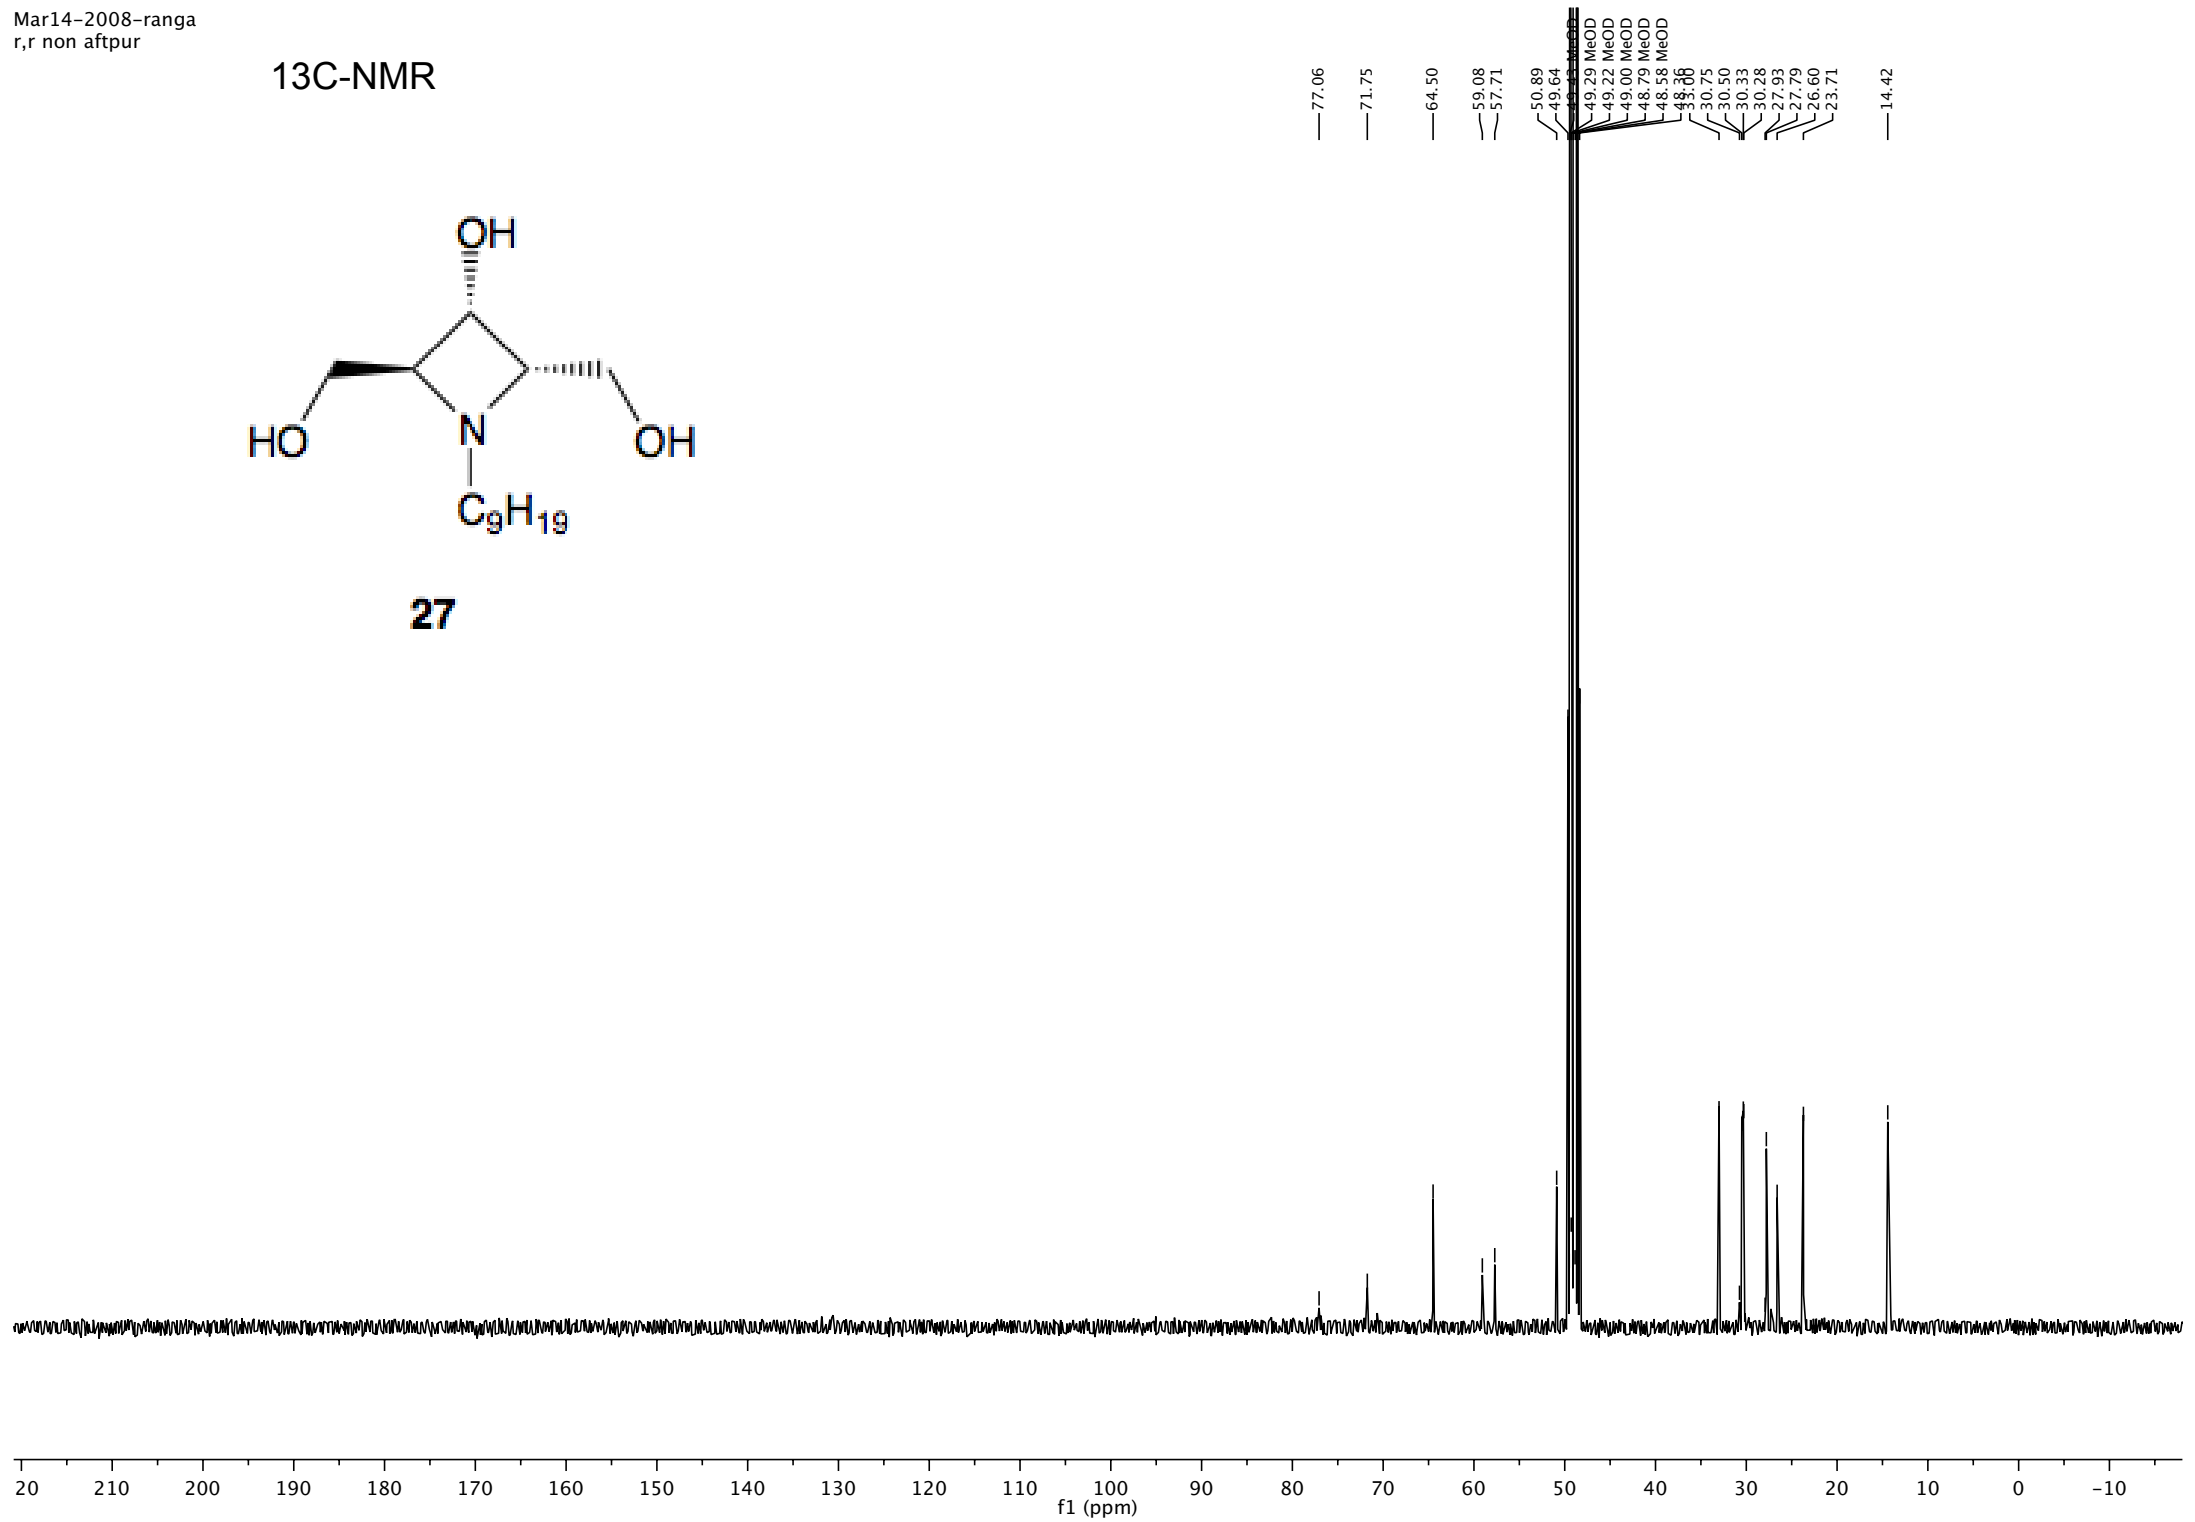

Supplement: NIHMS365482-supplement-1_si_001.pdf [file NIHMS365482-supplement-1_si_001.pdf]
